# Supplementary material for: Identification of Novel SARS-CoV-2 Drug Targets by Host MicroRNAs and Transcription Factors Co-regulatory Interaction Network Analysis
Source: Front Genet. 2020 Oct 14;11:571274. doi: 10.3389/fgene.2020.571274 (PMC7591747; doi:10.3389/fgene.2020.571274)
Supplement: TABLE S2 — List of miRNA targeting host genes identified using the miRnet server. [file Table_2.xlsx]

## Sheet: Sheet1
ID	Accession	Target	TargetID	Experiment	Literature	Tissue
hsa-let-7a-5p	MIMAT0000062	GNG5	2787	PAR-CLIP	20371350|27292025	Unspecified
hsa-let-7a-5p	MIMAT0000062	NPTX1	4884	CLASH	23622248	Unspecified
hsa-let-7a-5p	MIMAT0000062	PRIM2	5558	HITS-CLIP	23706177	Unspecified
hsa-let-7a-5p	MIMAT0000062	RDX	5962	PAR-CLIP	23446348|21572407|26701625	Unspecified
hsa-let-7a-5p	MIMAT0000062	PDE4DIP	9659	CLASH	23622248	Unspecified
hsa-let-7a-5p	MIMAT0000062	CEP135	9662	PAR-CLIP	24398324	Unspecified
hsa-let-7a-5p	MIMAT0000062	NUP58	9818	CLASH	23622248	Unspecified
hsa-let-7a-5p	MIMAT0000062	UBAP2L	9898	CLASH	23622248	Unspecified
hsa-let-7a-5p	MIMAT0000062	AKAP8	10270	PAR-CLIP	21572407|20371350	Unspecified
hsa-let-7a-5p	MIMAT0000062	CNTRL	11064	CLASH	23622248	Unspecified
hsa-let-7a-5p	MIMAT0000062	PMPCA	23203	PAR-CLIP	21572407|20371350	Unspecified
hsa-let-7a-5p	MIMAT0000062	LARP1	23367	CLASH	23622248	Unspecified
hsa-let-7a-5p	MIMAT0000062	PLD3	23646	PAR-CLIP	26701625	Unspecified
hsa-let-7a-5p	MIMAT0000062	TMED5	50999	HITS-CLIP//PAR-CLIP	23592263|24906430	Unspecified
hsa-let-7a-5p	MIMAT0000062	MRPS2	51116	CLASH	23622248	Unspecified
hsa-let-7a-5p	MIMAT0000062	DPH5	51611	CLASH	23622248	Unspecified
hsa-let-7a-5p	MIMAT0000062	UBAP2	55833	CLASH	23622248	Unspecified
hsa-let-7a-5p	MIMAT0000062	MEPCE	56257	CLASH	23622248	Unspecified
hsa-let-7a-5p	MIMAT0000062	MIB1	57534	CLASH	23622248	Unspecified
hsa-let-7a-5p	MIMAT0000062	PTGES2	80142	CLASH	23622248	Unspecified
hsa-let-7a-5p	MIMAT0000062	EDEM3	80267	HITS-CLIP	23313552	Unspecified
hsa-let-7a-5p	MIMAT0000062	ZC3H18	124245	CLASH	23622248	Unspecified
hsa-let-7a-5p	MIMAT0000062	ARL6IP6	151188	CLASH	23622248	Unspecified
hsa-let-7a-5p	MIMAT0000062	ANO6	196527	CLASH	23622248	Unspecified
hsa-let-7b-5p	MIMAT0000063	DDX10	1662	Proteomics	18668040	Unspecified
hsa-let-7b-5p	MIMAT0000063	ETFA	2108	CLASH	23622248	Unspecified
hsa-let-7b-5p	MIMAT0000063	GNB1	2782	CLASH	23622248	Unspecified
hsa-let-7b-5p	MIMAT0000063	GNG5	2787	PAR-CLIP	20371350|27292025	Unspecified
hsa-let-7b-5p	MIMAT0000063	IMPDH2	3615	Proteomics	18668040	Unspecified
hsa-let-7b-5p	MIMAT0000063	MOV10	4343	CLASH	23622248	Unspecified
hsa-let-7b-5p	MIMAT0000063	ABCC1	4363	Proteomics	18668040	Unspecified
hsa-let-7b-5p	MIMAT0000063	PRIM1	5557	Proteomics//pSILAC	18668040	Unspecified
hsa-let-7b-5p	MIMAT0000063	PRIM2	5558	HITS-CLIP	23706177	Unspecified
hsa-let-7b-5p	MIMAT0000063	PRKAR2A	5576	Proteomics	18668040	Unspecified
hsa-let-7b-5p	MIMAT0000063	PVR	5817	Proteomics	18668040	Unspecified
hsa-let-7b-5p	MIMAT0000063	RDX	5962	PAR-CLIP//Proteomics	18668040|23446348|21572407|26701625	Unspecified
hsa-let-7b-5p	MIMAT0000063	BRD2	6046	CLASH	23622248	Unspecified
hsa-let-7b-5p	MIMAT0000063	UBXN8	7993	Proteomics	18668040	Unspecified
hsa-let-7b-5p	MIMAT0000063	NUP214	8021	CLASH//Proteomics	18668040|23622248	Unspecified
hsa-let-7b-5p	MIMAT0000063	CUL2	8453	CLASH	23622248	Unspecified
hsa-let-7b-5p	MIMAT0000063	DDX21	9188	Proteomics	18668040	Unspecified
hsa-let-7b-5p	MIMAT0000063	SLC9A3R1	9368	Proteomics	18668040	Unspecified
hsa-let-7b-5p	MIMAT0000063	BAG5	9529	Proteomics	18668040	Unspecified
hsa-let-7b-5p	MIMAT0000063	HS2ST1	9653	Proteomics	18668040	Unspecified
hsa-let-7b-5p	MIMAT0000063	CEP135	9662	PAR-CLIP	24398324	Unspecified
hsa-let-7b-5p	MIMAT0000063	UBAP2L	9898	CLASH//Proteomics	18668040|23622248	Unspecified
hsa-let-7b-5p	MIMAT0000063	DCAF7	10238	CLASH	23622248	Unspecified
hsa-let-7b-5p	MIMAT0000063	AKAP8	10270	PAR-CLIP//Proteomics//pSILAC	18668040|21572407|20371350	Unspecified
hsa-let-7b-5p	MIMAT0000063	SIGMAR1	10280	Microarray//Proteomics//pSILAC	17699775|18668040	Unspecified
hsa-let-7b-5p	MIMAT0000063	TUBGCP3	10426	CLASH	23622248	Unspecified
hsa-let-7b-5p	MIMAT0000063	TUBGCP2	10844	Proteomics	18668040	Unspecified
hsa-let-7b-5p	MIMAT0000063	RAB10	10890	CLASH	23622248	Unspecified
hsa-let-7b-5p	MIMAT0000063	LMAN2	10960	CLASH	23622248	Unspecified
hsa-let-7b-5p	MIMAT0000063	SLC27A2	11001	Proteomics	18668040	Unspecified
hsa-let-7b-5p	MIMAT0000063	ATE1	11101	CLASH	23622248	Unspecified
hsa-let-7b-5p	MIMAT0000063	ERC1	23085	Proteomics//pSILAC	18668040	Unspecified
hsa-let-7b-5p	MIMAT0000063	PMPCA	23203	PAR-CLIP	21572407|20371350	Unspecified
hsa-let-7b-5p	MIMAT0000063	VPS39	23339	Proteomics//pSILAC	18668040	Unspecified
hsa-let-7b-5p	MIMAT0000063	LARP1	23367	CLASH	23622248	Unspecified
hsa-let-7b-5p	MIMAT0000063	PLD3	23646	PAR-CLIP	26701625	Unspecified
hsa-let-7b-5p	MIMAT0000063	TIMM9	26520	Proteomics	18668040	Unspecified
hsa-let-7b-5p	MIMAT0000063	AATF	26574	CLASH	23622248	Unspecified
hsa-let-7b-5p	MIMAT0000063	PABPC1	26986	CLASH	23622248	Unspecified
hsa-let-7b-5p	MIMAT0000063	CHMP2A	27243	Proteomics//pSILAC	18668040	Unspecified
hsa-let-7b-5p	MIMAT0000063	MAT2B	27430	Proteomics	18668040	Unspecified
hsa-let-7b-5p	MIMAT0000063	BZW2	28969	Proteomics	18668040	Unspecified
hsa-let-7b-5p	MIMAT0000063	TMED5	50999	HITS-CLIP//PAR-CLIP//Proteomics	18668040|23592263|24906430	Unspecified
hsa-let-7b-5p	MIMAT0000063	CHPF2	54480	Proteomics//pSILAC	18668040	Unspecified
hsa-let-7b-5p	MIMAT0000063	TRMT1	55621	Proteomics//pSILAC	18668040	Unspecified
hsa-let-7b-5p	MIMAT0000063	MAP7D1	55700	Proteomics//pSILAC	18668040	Unspecified
hsa-let-7b-5p	MIMAT0000063	DNAJC11	55735	Proteomics	18668040	Unspecified
hsa-let-7b-5p	MIMAT0000063	MIB1	57534	CLASH	23622248	Unspecified
hsa-let-7b-5p	MIMAT0000063	DCTPP1	79077	Proteomics//pSILAC	18668040	Unspecified
hsa-let-7b-5p	MIMAT0000063	NARS2	79731	Proteomics	18668040	Unspecified
hsa-let-7b-5p	MIMAT0000063	FOXRED2	80020	CLASH	23622248	Unspecified
hsa-let-7b-5p	MIMAT0000063	PTGES2	80142	CLASH	23622248	Unspecified
hsa-let-7b-5p	MIMAT0000063	EDEM3	80267	HITS-CLIP//Proteomics//pSILAC	18668040|23313552	Unspecified
hsa-let-7b-5p	MIMAT0000063	PRRC2B	84726	CLASH	23622248	Unspecified
hsa-let-7b-5p	MIMAT0000063	NEK9	91754	CLASH	23622248	Unspecified
hsa-let-7b-5p	MIMAT0000063	SLC30A7	148867	Proteomics	18668040	Unspecified
hsa-let-7b-5p	MIMAT0000063	USP54	159195	CLASH	23622248	Unspecified
hsa-let-7c-5p	MIMAT0000064	DNMT1	1786	3'LIFE	25074381	Unspecified
hsa-let-7c-5p	MIMAT0000064	GNG5	2787	PAR-CLIP	20371350|27292025	Unspecified
hsa-let-7c-5p	MIMAT0000064	NPTX1	4884	CLASH	23622248	Unspecified
hsa-let-7c-5p	MIMAT0000064	PRIM2	5558	HITS-CLIP	23706177	Unspecified
hsa-let-7c-5p	MIMAT0000064	RDX	5962	PAR-CLIP	23446348|21572407|26701625	Unspecified
hsa-let-7c-5p	MIMAT0000064	BRD2	6046	CLASH	23622248	Unspecified
hsa-let-7c-5p	MIMAT0000064	CEP135	9662	PAR-CLIP	24398324	Unspecified
hsa-let-7c-5p	MIMAT0000064	NUP58	9818	CLASH	23622248	Unspecified
hsa-let-7c-5p	MIMAT0000064	DCAF7	10238	CLASH	23622248	Unspecified
hsa-let-7c-5p	MIMAT0000064	AKAP8	10270	PAR-CLIP	21572407|20371350	Unspecified
hsa-let-7c-5p	MIMAT0000064	RAB10	10890	CLASH	23622248	Unspecified
hsa-let-7c-5p	MIMAT0000064	PMPCA	23203	PAR-CLIP	21572407|20371350	Unspecified
hsa-let-7c-5p	MIMAT0000064	PLD3	23646	PAR-CLIP	26701625	Unspecified
hsa-let-7c-5p	MIMAT0000064	TMED5	50999	HITS-CLIP//PAR-CLIP	23592263|24906430	Unspecified
hsa-let-7c-5p	MIMAT0000064	FKBP10	60681	CLASH	23622248	Unspecified
hsa-let-7c-5p	MIMAT0000064	PTGES2	80142	CLASH	23622248	Unspecified
hsa-let-7c-5p	MIMAT0000064	EDEM3	80267	HITS-CLIP	23313552	Unspecified
hsa-let-7d-5p	MIMAT0000065	GNG5	2787	PAR-CLIP	20371350|27292025	Unspecified
hsa-let-7d-5p	MIMAT0000065	PRIM2	5558	HITS-CLIP	23706177	Unspecified
hsa-let-7d-5p	MIMAT0000065	RDX	5962	PAR-CLIP	23446348|21572407|26701625	Unspecified
hsa-let-7d-5p	MIMAT0000065	CEP135	9662	PAR-CLIP	24398324	Unspecified
hsa-let-7d-5p	MIMAT0000065	AKAP8	10270	PAR-CLIP//Sequencing	20371350|21572407	Unspecified
hsa-let-7d-5p	MIMAT0000065	ERC1	23085	Sequencing	20371350	Unspecified
hsa-let-7d-5p	MIMAT0000065	LARP4B	23185	Sequencing	20371350	Unspecified
hsa-let-7d-5p	MIMAT0000065	PMPCA	23203	PAR-CLIP	21572407|20371350	Unspecified
hsa-let-7d-5p	MIMAT0000065	PLD3	23646	PAR-CLIP	26701625	Unspecified
hsa-let-7d-5p	MIMAT0000065	TMED5	50999	HITS-CLIP//PAR-CLIP	23592263|24906430	Unspecified
hsa-let-7d-5p	MIMAT0000065	SLC30A6	55676	Sequencing	20371350	Unspecified
hsa-let-7d-5p	MIMAT0000065	EDEM3	80267	HITS-CLIP	23313552	Unspecified
hsa-let-7e-5p	MIMAT0000066	COL6A1	1291	CLASH	23622248	Unspecified
hsa-let-7e-5p	MIMAT0000066	GNG5	2787	CLASH//PAR-CLIP	23622248|20371350|27292025	Unspecified
hsa-let-7e-5p	MIMAT0000066	PRIM2	5558	HITS-CLIP	23706177	Unspecified
hsa-let-7e-5p	MIMAT0000066	RDX	5962	CLASH//PAR-CLIP	23622248|23446348|21572407|26701625	Unspecified
hsa-let-7e-5p	MIMAT0000066	CEP135	9662	PAR-CLIP	24398324	Unspecified
hsa-let-7e-5p	MIMAT0000066	UBAP2L	9898	CLASH	23622248	Unspecified
hsa-let-7e-5p	MIMAT0000066	AKAP8	10270	PAR-CLIP	21572407|20371350	Unspecified
hsa-let-7e-5p	MIMAT0000066	PMPCA	23203	CLASH//PAR-CLIP	23622248|21572407|20371350	Unspecified
hsa-let-7e-5p	MIMAT0000066	PLD3	23646	PAR-CLIP	26701625	Unspecified
hsa-let-7e-5p	MIMAT0000066	TMED5	50999	HITS-CLIP//PAR-CLIP	23592263|24906430	Unspecified
hsa-let-7e-5p	MIMAT0000066	MRPS2	51116	CLASH	23622248	Unspecified
hsa-let-7e-5p	MIMAT0000066	EDEM3	80267	HITS-CLIP	23313552	Unspecified
hsa-let-7e-5p	MIMAT0000066	HS6ST2	90161	CLASH	23622248	Unspecified
hsa-let-7e-5p	MIMAT0000066	PIGS	94005	CLASH	23622248	Unspecified
hsa-let-7f-5p	MIMAT0000067	GNG5	2787	PAR-CLIP	20371350|27292025	Unspecified
hsa-let-7f-5p	MIMAT0000067	HDAC2	3066	qRT-PCR	24405266	Unspecified
hsa-let-7f-5p	MIMAT0000067	PRIM2	5558	HITS-CLIP	23706177	Unspecified
hsa-let-7f-5p	MIMAT0000067	RDX	5962	PAR-CLIP	23446348|21572407|26701625	Unspecified
hsa-let-7f-5p	MIMAT0000067	CEP135	9662	PAR-CLIP	24398324	Unspecified
hsa-let-7f-5p	MIMAT0000067	UBAP2L	9898	CLASH	23622248	Unspecified
hsa-let-7f-5p	MIMAT0000067	AKAP8	10270	PAR-CLIP	21572407|20371350	Unspecified
hsa-let-7f-5p	MIMAT0000067	PMPCA	23203	PAR-CLIP	21572407|20371350	Unspecified
hsa-let-7f-5p	MIMAT0000067	LARP1	23367	CLASH	23622248	Unspecified
hsa-let-7f-5p	MIMAT0000067	PLD3	23646	PAR-CLIP	26701625	Unspecified
hsa-let-7f-5p	MIMAT0000067	TMED5	50999	HITS-CLIP//PAR-CLIP	23592263|24906430	Unspecified
hsa-let-7f-5p	MIMAT0000067	UBAP2	55833	CLASH	23622248	Unspecified
hsa-let-7f-5p	MIMAT0000067	EDEM3	80267	HITS-CLIP	23313552	Unspecified
hsa-let-7f-5p	MIMAT0000067	ZC3H18	124245	CLASH	23622248	Unspecified
hsa-mir-15a-5p	MIMAT0000068	ATP6AP1	537	CLASH	23622248	Unspecified
hsa-mir-15a-5p	MIMAT0000068	GNB1	2782	HITS-CLIP//PAR-CLIP	22473208|23592263|21572407|20371350	Unspecified
hsa-mir-15a-5p	MIMAT0000068	PRIM1	5557	Microarray	18362358	Unspecified
hsa-mir-15a-5p	MIMAT0000068	PRKAR2A	5576	PAR-CLIP	23592263|23446348|21572407|20371350	Unspecified
hsa-mir-15a-5p	MIMAT0000068	CSDE1	7812	HITS-CLIP	22473208	Unspecified
hsa-mir-15a-5p	MIMAT0000068	CUL2	8453	HITS-CLIP	22473208	Unspecified
hsa-mir-15a-5p	MIMAT0000068	HYOU1	10525	HITS-CLIP	22473208	Unspecified
hsa-mir-15a-5p	MIMAT0000068	CLCC1	23155	CLASH	23622248	Unspecified
hsa-mir-15a-5p	MIMAT0000068	RPL36	25873	HITS-CLIP	22473208	Unspecified
hsa-mir-15a-5p	MIMAT0000068	SBNO1	55206	PAR-CLIP	23446348|21572407|20371350	Unspecified
hsa-mir-15a-5p	MIMAT0000068	RTN4	57142	PAR-CLIP	21572407	Unspecified
hsa-mir-15a-5p	MIMAT0000068	MIB1	57534	HITS-CLIP	22473208	Unspecified
hsa-mir-15a-5p	MIMAT0000068	ATP13A3	79572	HITS-CLIP	22473208	Unspecified
hsa-mir-15a-5p	MIMAT0000068	CLIP4	79745	PAR-CLIP	21572407|20371350	Unspecified
hsa-mir-16-5p	MIMAT0000069	CENPF	1063	Proteomics	18668040	Unspecified
hsa-mir-16-5p	MIMAT0000069	AP2M1	1173	Proteomics	18668040	Unspecified
hsa-mir-16-5p	MIMAT0000069	COMT	1312	CLASH//Proteomics	18668040|23622248	Unspecified
hsa-mir-16-5p	MIMAT0000069	TOR1A	1861	CLASH	23622248	Unspecified
hsa-mir-16-5p	MIMAT0000069	GNB1	2782	HITS-CLIP//Microarray//PAR-CLIP//Sequencing	20371350|21199864|22473208|23592263|21572407	Unspecified
hsa-mir-16-5p	MIMAT0000069	HMOX1	3162	Proteomics//pSILAC	18668040	Unspecified
hsa-mir-16-5p	MIMAT0000069	IMPDH2	3615	Proteomics	18668040	Unspecified
hsa-mir-16-5p	MIMAT0000069	MOV10	4343	Proteomics//Sequencing	18668040|20371350	Unspecified
hsa-mir-16-5p	MIMAT0000069	ABCC1	4363	CLASH	23622248	Unspecified
hsa-mir-16-5p	MIMAT0000069	NUP98	4928	CLASH	23622248	Unspecified
hsa-mir-16-5p	MIMAT0000069	PPT1	5538	Proteomics	18668040	Unspecified
hsa-mir-16-5p	MIMAT0000069	PRIM1	5557	Microarray	18362358	Unspecified
hsa-mir-16-5p	MIMAT0000069	PRKAR2A	5576	PAR-CLIP//Sequencing	20371350|23592263|23446348|21572407	Unspecified
hsa-mir-16-5p	MIMAT0000069	PVR	5817	Proteomics	18668040	Unspecified
hsa-mir-16-5p	MIMAT0000069	RAB1A	5861	Proteomics	18668040	Unspecified
hsa-mir-16-5p	MIMAT0000069	SRP19	6728	Proteomics	18668040	Unspecified
hsa-mir-16-5p	MIMAT0000069	SRP72	6731	Proteomics	18668040	Unspecified
hsa-mir-16-5p	MIMAT0000069	CSDE1	7812	HITS-CLIP//Proteomics	18668040|22473208	Unspecified
hsa-mir-16-5p	MIMAT0000069	CUL2	8453	HITS-CLIP	22473208	Unspecified
hsa-mir-16-5p	MIMAT0000069	GPAA1	8733	CLASH	23622248	Unspecified
hsa-mir-16-5p	MIMAT0000069	PABPC4	8761	CLASH//Proteomics	18668040|23622248	Unspecified
hsa-mir-16-5p	MIMAT0000069	RRP9	9136	Proteomics	18668040	Unspecified
hsa-mir-16-5p	MIMAT0000069	DDX21	9188	Proteomics	18668040	Unspecified
hsa-mir-16-5p	MIMAT0000069	G3BP2	9908	Proteomics	18668040	Unspecified
hsa-mir-16-5p	MIMAT0000069	DCAF7	10238	Proteomics	18668040	Unspecified
hsa-mir-16-5p	MIMAT0000069	HYOU1	10525	HITS-CLIP	22473208	Unspecified
hsa-mir-16-5p	MIMAT0000069	TUBGCP2	10844	CLASH	23622248	Unspecified
hsa-mir-16-5p	MIMAT0000069	MDN1	23195	Proteomics	18668040	Unspecified
hsa-mir-16-5p	MIMAT0000069	LARP1	23367	Proteomics	18668040	Unspecified
hsa-mir-16-5p	MIMAT0000069	POFUT1	23509	Proteomics	18668040	Unspecified
hsa-mir-16-5p	MIMAT0000069	PLD3	23646	CLASH	23622248	Unspecified
hsa-mir-16-5p	MIMAT0000069	RPL36	25873	HITS-CLIP	22473208	Unspecified
hsa-mir-16-5p	MIMAT0000069	TIMM10B	26515	Proteomics//Sequencing	20371350|18668040	Unspecified
hsa-mir-16-5p	MIMAT0000069	MRPS2	51116	Proteomics	18668040	Unspecified
hsa-mir-16-5p	MIMAT0000069	GOLGA7	51125	CLASH	23622248	Unspecified
hsa-mir-16-5p	MIMAT0000069	NIN	51199	Sequencing	20371350	Unspecified
hsa-mir-16-5p	MIMAT0000069	HEATR3	55027	CLASH	23622248	Unspecified
hsa-mir-16-5p	MIMAT0000069	RBM28	55131	Proteomics	18668040	Unspecified
hsa-mir-16-5p	MIMAT0000069	SBNO1	55206	PAR-CLIP	23446348|21572407|20371350	Unspecified
hsa-mir-16-5p	MIMAT0000069	TRMT1	55621	Proteomics	18668040	Unspecified
hsa-mir-16-5p	MIMAT0000069	MEPCE	56257	Proteomics	18668040	Unspecified
hsa-mir-16-5p	MIMAT0000069	RTN4	57142	Microarray//PAR-CLIP//Proteomics//pSILAC	18668040|21199864|21572407	Unspecified
hsa-mir-16-5p	MIMAT0000069	MIB1	57534	HITS-CLIP//Sequencing	20371350|22473208	Unspecified
hsa-mir-16-5p	MIMAT0000069	MRPS25	64432	Proteomics	18668040	Unspecified
hsa-mir-16-5p	MIMAT0000069	GCC1	79571	Sequencing	20371350	Unspecified
hsa-mir-16-5p	MIMAT0000069	ATP13A3	79572	HITS-CLIP//Sequencing	20371350|22473208	Unspecified
hsa-mir-16-5p	MIMAT0000069	NARS2	79731	Proteomics	18668040	Unspecified
hsa-mir-16-5p	MIMAT0000069	CLIP4	79745	PAR-CLIP	21572407|20371350	Unspecified
hsa-mir-16-5p	MIMAT0000069	QSOX2	169714	Proteomics	18668040	Unspecified
hsa-mir-17-5p	MIMAT0000070	DNMT1	1786	Luciferase reporter assay	23306545	Unspecified
hsa-mir-17-5p	MIMAT0000070	F2RL1	2150	HITS-CLIP	23313552	Unspecified
hsa-mir-17-5p	MIMAT0000070	GNB1	2782	CLASH	23622248	Unspecified
hsa-mir-17-5p	MIMAT0000070	GOLGA2	2801	HITS-CLIP	19536157	Unspecified
hsa-mir-17-5p	MIMAT0000070	ITGB1	3688	PAR-CLIP	20371350	Unspecified
hsa-mir-17-5p	MIMAT0000070	NUP98	4928	HITS-CLIP	22473208	Unspecified
hsa-mir-17-5p	MIMAT0000070	PRIM1	5557	HITS-CLIP//PAR-CLIP	23446348|23313552	Unspecified
hsa-mir-17-5p	MIMAT0000070	PVR	5817	PAR-CLIP	21572407|20371350	Unspecified
hsa-mir-17-5p	MIMAT0000070	ELOC	6921	HITS-CLIP	23824327	Unspecified
hsa-mir-17-5p	MIMAT0000070	EIF4H	7458	PAR-CLIP	22012620|21572407|20371350	Unspecified
hsa-mir-17-5p	MIMAT0000070	NSD2	7468	HITS-CLIP	22473208	Unspecified
hsa-mir-17-5p	MIMAT0000070	CSDE1	7812	PAR-CLIP	21572407	Unspecified
hsa-mir-17-5p	MIMAT0000070	REEP5	7905	CLASH//HITS-CLIP	23622248|22473208	Unspecified
hsa-mir-17-5p	MIMAT0000070	RAB10	10890	PAR-CLIP	21572407|20371350|27292025	Unspecified
hsa-mir-17-5p	MIMAT0000070	CIT	11113	HITS-CLIP	22473208	Unspecified
hsa-mir-17-5p	MIMAT0000070	EMC1	23065	PAR-CLIP	22100165	Unspecified
hsa-mir-17-5p	MIMAT0000070	MYCBP2	23077	CLASH	23622248	Unspecified
hsa-mir-17-5p	MIMAT0000070	LARP1	23367	CLASH	23622248	Unspecified
hsa-mir-17-5p	MIMAT0000070	POFUT1	23509	HITS-CLIP	22473208	Unspecified
hsa-mir-17-5p	MIMAT0000070	NIN	51199	PAR-CLIP	23592263|21572407	Unspecified
hsa-mir-17-5p	MIMAT0000070	PDZD11	51248	HITS-CLIP	22473208	Unspecified
hsa-mir-17-5p	MIMAT0000070	FAM8A1	51439	CLASH	23622248	Unspecified
hsa-mir-17-5p	MIMAT0000070	RBM41	55285	HITS-CLIP	23313552	Unspecified
hsa-mir-17-5p	MIMAT0000070	SMOC1	64093	PAR-CLIP	21572407	Unspecified
hsa-mir-17-5p	MIMAT0000070	CRTC3	64784	HITS-CLIP	22473208	Unspecified
hsa-mir-17-5p	MIMAT0000070	DCTPP1	79077	CLASH	23622248	Unspecified
hsa-mir-17-5p	MIMAT0000070	C1orf50	79078	HITS-CLIP	23313552	Unspecified
hsa-mir-17-5p	MIMAT0000070	FYCO1	79443	HITS-CLIP	22473208	Unspecified
hsa-mir-17-5p	MIMAT0000070	CLIP4	79745	PAR-CLIP	20371350	Unspecified
hsa-mir-17-5p	MIMAT0000070	FOXRED2	80020	HITS-CLIP	23313552	Unspecified
hsa-mir-17-5p	MIMAT0000070	PIGO	84720	HITS-CLIP	22473208	Unspecified
hsa-mir-17-5p	MIMAT0000070	PIGS	94005	CLASH	23622248	Unspecified
hsa-mir-17-5p	MIMAT0000070	ZC3H18	124245	CLASH	23622248	Unspecified
hsa-mir-17-5p	MIMAT0000070	SLC30A7	148867	PAR-CLIP	23592263	Unspecified
hsa-mir-17-3p	MIMAT0000071	MARK2	2011	PAR-CLIP	26701625	Unspecified
hsa-mir-17-3p	MIMAT0000071	IMPDH2	3615	CLASH	23622248	Unspecified
hsa-mir-17-3p	MIMAT0000071	NUP98	4928	PAR-CLIP	26701625	Unspecified
hsa-mir-17-3p	MIMAT0000071	PRKAR2A	5576	HITS-CLIP	27418678	Unspecified
hsa-mir-17-3p	MIMAT0000071	RAB1A	5861	PAR-CLIP	21572407	Unspecified
hsa-mir-17-3p	MIMAT0000071	FAM98A	25940	PAR-CLIP	24398324|23446348|21572407|20371350	Unspecified
hsa-mir-17-3p	MIMAT0000071	PABPC1	26986	HITS-CLIP	23706177	Unspecified
hsa-mir-17-3p	MIMAT0000071	SBNO1	55206	PAR-CLIP	26701625	Unspecified
hsa-mir-17-3p	MIMAT0000071	GCC1	79571	HITS-CLIP	23824327	Unspecified
hsa-mir-17-3p	MIMAT0000071	QSOX2	169714	CLASH	23622248	Unspecified
hsa-mir-18a-5p	MIMAT0000072	ARF6	382	PAR-CLIP	20371350	Unspecified
hsa-mir-18a-5p	MIMAT0000072	DNMT1	1786	Luciferase reporter assay	23306545	Unspecified
hsa-mir-18a-5p	MIMAT0000072	ETFA	2108	CLASH	23622248	Unspecified
hsa-mir-18a-5p	MIMAT0000072	RAB5C	5878	PAR-CLIP	23592263|23446348|21572407|20371350|26701625	Unspecified
hsa-mir-18a-5p	MIMAT0000072	TLE3	7090	CLASH	23622248	Unspecified
hsa-mir-18a-5p	MIMAT0000072	DCAF7	10238	CLASH//PAR-CLIP	23622248|21572407|20371350	Unspecified
hsa-mir-18a-5p	MIMAT0000072	MAP7D1	55700	Sequencing	20371350	Unspecified
hsa-mir-18a-5p	MIMAT0000072	ZC3H18	124245	CLASH	23622248	Unspecified
hsa-mir-19a-3p	MIMAT0000073	DNMT1	1786	Luciferase reporter assay	23306545	Unspecified
hsa-mir-19a-3p	MIMAT0000073	RAB1A	5861	PAR-CLIP	21572407	Unspecified
hsa-mir-19a-3p	MIMAT0000073	USP13	8975	PAR-CLIP	21572407	Unspecified
hsa-mir-19a-3p	MIMAT0000073	EIF4E2	9470	HITS-CLIP	22473208	Unspecified
hsa-mir-19a-3p	MIMAT0000073	CEP350	9857	HITS-CLIP//PAR-CLIP	22473208|23446348|21572407	Unspecified
hsa-mir-19a-3p	MIMAT0000073	G3BP2	9908	PAR-CLIP	24398324|23446348|22012620|21572407|20371350	Unspecified
hsa-mir-19a-3p	MIMAT0000073	DCAF7	10238	HITS-CLIP//PAR-CLIP	22473208|21572407	Unspecified
hsa-mir-19a-3p	MIMAT0000073	CIT	11113	HITS-CLIP	22473208	Unspecified
hsa-mir-19a-3p	MIMAT0000073	RAB18	22931	HITS-CLIP	22473208	Unspecified
hsa-mir-19a-3p	MIMAT0000073	SPART	23111	PAR-CLIP	23446348|21572407|20371350	Unspecified
hsa-mir-19a-3p	MIMAT0000073	FKBP15	23307	HITS-CLIP	22473208|23313552	Unspecified
hsa-mir-19a-3p	MIMAT0000073	RAB14	51552	HITS-CLIP//PAR-CLIP//Reporter assay	21751348|22473208|23592263	Unspecified
hsa-mir-19a-3p	MIMAT0000073	NUP54	53371	HITS-CLIP//PAR-CLIP	22473208|23446348|21572407|20371350	Unspecified
hsa-mir-19a-3p	MIMAT0000073	PTBP2	58155	HITS-CLIP//PAR-CLIP	24398324|23446348|21572407|20371350|23706177|27292025	Unspecified
hsa-mir-19a-3p	MIMAT0000073	SMOC1	64093	PAR-CLIP	21572407	Unspecified
hsa-mir-19a-3p	MIMAT0000073	PLEKHF2	79666	PAR-CLIP	24398324|21572407	Unspecified
hsa-mir-19a-3p	MIMAT0000073	PIGS	94005	HITS-CLIP	22473208	Unspecified
hsa-mir-19a-3p	MIMAT0000073	SLC30A7	148867	HITS-CLIP//PAR-CLIP	22473208|21572407	Unspecified
hsa-mir-19b-3p	MIMAT0000074	DNMT1	1786	Luciferase reporter assay	23306545	Unspecified
hsa-mir-19b-3p	MIMAT0000074	RAB1A	5861	PAR-CLIP//Sequencing	20371350|21572407	Unspecified
hsa-mir-19b-3p	MIMAT0000074	USP13	8975	PAR-CLIP	21572407	Unspecified
hsa-mir-19b-3p	MIMAT0000074	EIF4E2	9470	HITS-CLIP	22473208	Unspecified
hsa-mir-19b-3p	MIMAT0000074	CEP350	9857	HITS-CLIP//PAR-CLIP//Sequencing	20371350|22473208|23446348|21572407	Unspecified
hsa-mir-19b-3p	MIMAT0000074	G3BP2	9908	PAR-CLIP	24398324|23446348|22012620|21572407|20371350	Unspecified
hsa-mir-19b-3p	MIMAT0000074	RNF41	10193	Sequencing	20371350	Unspecified
hsa-mir-19b-3p	MIMAT0000074	NUTF2	10204	CLASH	23622248	Unspecified
hsa-mir-19b-3p	MIMAT0000074	DCAF7	10238	HITS-CLIP//PAR-CLIP//Sequencing	20371350|22473208|21572407	Unspecified
hsa-mir-19b-3p	MIMAT0000074	CIT	11113	HITS-CLIP	22473208	Unspecified
hsa-mir-19b-3p	MIMAT0000074	RAB18	22931	HITS-CLIP	22473208	Unspecified
hsa-mir-19b-3p	MIMAT0000074	SPART	23111	PAR-CLIP//Sequencing	20371350|23446348|21572407	Unspecified
hsa-mir-19b-3p	MIMAT0000074	FKBP15	23307	HITS-CLIP	22473208|23313552	Unspecified
hsa-mir-19b-3p	MIMAT0000074	PDZD11	51248	Sequencing	20371350	Unspecified
hsa-mir-19b-3p	MIMAT0000074	RAB14	51552	HITS-CLIP//PAR-CLIP	22473208|23592263	Unspecified
hsa-mir-19b-3p	MIMAT0000074	NUP54	53371	HITS-CLIP//PAR-CLIP	22473208|23446348|21572407|20371350	Unspecified
hsa-mir-19b-3p	MIMAT0000074	PTBP2	58155	HITS-CLIP//PAR-CLIP	24398324|23446348|21572407|20371350|23706177|27292025	Unspecified
hsa-mir-19b-3p	MIMAT0000074	SMOC1	64093	PAR-CLIP	21572407	Unspecified
hsa-mir-19b-3p	MIMAT0000074	FYCO1	79443	Sequencing	20371350	Unspecified
hsa-mir-19b-3p	MIMAT0000074	PLEKHF2	79666	PAR-CLIP	24398324|21572407	Unspecified
hsa-mir-19b-3p	MIMAT0000074	PIGS	94005	HITS-CLIP	22473208	Unspecified
hsa-mir-19b-3p	MIMAT0000074	SLC30A7	148867	HITS-CLIP//PAR-CLIP	22473208|21572407	Unspecified
hsa-mir-19b-3p	MIMAT0000074	TRIM59	286827	Sequencing	20371350	Unspecified
hsa-mir-20a-5p	MIMAT0000075	DNMT1	1786	Luciferase reporter assay	23306545	Unspecified
hsa-mir-20a-5p	MIMAT0000075	F2RL1	2150	HITS-CLIP	23313552	Unspecified
hsa-mir-20a-5p	MIMAT0000075	GOLGA2	2801	HITS-CLIP	19536157	Unspecified
hsa-mir-20a-5p	MIMAT0000075	ITGB1	3688	PAR-CLIP	20371350	Unspecified
hsa-mir-20a-5p	MIMAT0000075	NUP98	4928	HITS-CLIP	22473208	Unspecified
hsa-mir-20a-5p	MIMAT0000075	PRIM1	5557	HITS-CLIP//PAR-CLIP	23446348|23313552	Unspecified
hsa-mir-20a-5p	MIMAT0000075	PVR	5817	PAR-CLIP	21572407|20371350	Unspecified
hsa-mir-20a-5p	MIMAT0000075	ELOC	6921	HITS-CLIP	23824327	Unspecified
hsa-mir-20a-5p	MIMAT0000075	EIF4H	7458	PAR-CLIP	22012620|21572407|20371350	Unspecified
hsa-mir-20a-5p	MIMAT0000075	NSD2	7468	HITS-CLIP	22473208	Unspecified
hsa-mir-20a-5p	MIMAT0000075	CSDE1	7812	PAR-CLIP	21572407	Unspecified
hsa-mir-20a-5p	MIMAT0000075	REEP5	7905	HITS-CLIP	22473208	Unspecified
hsa-mir-20a-5p	MIMAT0000075	NUP214	8021	CLASH	23622248	Unspecified
hsa-mir-20a-5p	MIMAT0000075	RAB10	10890	PAR-CLIP	21572407|20371350|27292025	Unspecified
hsa-mir-20a-5p	MIMAT0000075	CIT	11113	HITS-CLIP	22473208	Unspecified
hsa-mir-20a-5p	MIMAT0000075	EMC1	23065	PAR-CLIP	22100165	Unspecified
hsa-mir-20a-5p	MIMAT0000075	POFUT1	23509	HITS-CLIP	22473208	Unspecified
hsa-mir-20a-5p	MIMAT0000075	TMEM97	27346	CLASH	23622248	Unspecified
hsa-mir-20a-5p	MIMAT0000075	NIN	51199	PAR-CLIP	23592263|21572407	Unspecified
hsa-mir-20a-5p	MIMAT0000075	PDZD11	51248	HITS-CLIP	22473208	Unspecified
hsa-mir-20a-5p	MIMAT0000075	RBM41	55285	HITS-CLIP	23313552	Unspecified
hsa-mir-20a-5p	MIMAT0000075	SMOC1	64093	PAR-CLIP	21572407	Unspecified
hsa-mir-20a-5p	MIMAT0000075	CRTC3	64784	HITS-CLIP	22473208	Unspecified
hsa-mir-20a-5p	MIMAT0000075	C1orf50	79078	HITS-CLIP	23313552	Unspecified
hsa-mir-20a-5p	MIMAT0000075	FYCO1	79443	HITS-CLIP	22473208	Unspecified
hsa-mir-20a-5p	MIMAT0000075	CLIP4	79745	PAR-CLIP	20371350	Unspecified
hsa-mir-20a-5p	MIMAT0000075	FOXRED2	80020	HITS-CLIP	23313552	Unspecified
hsa-mir-20a-5p	MIMAT0000075	PIGO	84720	HITS-CLIP	22473208	Unspecified
hsa-mir-20a-5p	MIMAT0000075	SLC30A7	148867	PAR-CLIP	23592263	Unspecified
hsa-mir-21-5p	MIMAT0000076	PLAT	5327	Luciferase reporter assay//Microarray//qRT-PCR	21131358	Unspecified
hsa-mir-21-5p	MIMAT0000076	WFS1	7466	Quantitative proteomic approach	19253296	Unspecified
hsa-mir-21-5p	MIMAT0000076	NSD2	7468	Microarray	18591254	Unspecified
hsa-mir-21-5p	MIMAT0000076	AKAP9	10142	Microarray	19242418	Unspecified
hsa-mir-21-5p	MIMAT0000076	CNTRL	11064	Microarray	18591254	Unspecified
hsa-mir-21-5p	MIMAT0000076	ERP44	23071	PAR-CLIP	22100165	Unspecified
hsa-mir-21-5p	MIMAT0000076	MYCBP2	23077	Microarray	18591254	Unspecified
hsa-mir-21-5p	MIMAT0000076	HECTD1	25831	Microarray	18591254	Unspecified
hsa-mir-21-5p	MIMAT0000076	NIN	51199	Microarray	18591254	Unspecified
hsa-mir-21-5p	MIMAT0000076	RTN4	57142	HITS-CLIP//Luciferase reporter assay//Quantitative proteomic approach	19253296|22473208	Unspecified
hsa-mir-21-5p	MIMAT0000076	MIB1	57534	Microarray	18591254	Unspecified
hsa-mir-21-5p	MIMAT0000076	ZYG11B	79699	Microarray	18591254	Unspecified
hsa-mir-21-5p	MIMAT0000076	CLIP4	79745	Microarray	18591254	Unspecified
hsa-mir-21-5p	MIMAT0000076	TRIM59	286827	Microarray	18591254	Unspecified
hsa-mir-22-3p	MIMAT0000077	PRKACA	5566	Sequencing	20371350	Unspecified
hsa-mir-22-3p	MIMAT0000077	NUP214	8021	CLASH	23622248	Unspecified
hsa-mir-23a-3p	MIMAT0000078	FBN2	2201	HITS-CLIP	23824327	Unspecified
hsa-mir-23a-3p	MIMAT0000078	IMPDH2	3615	CLASH	23622248	Unspecified
hsa-mir-23a-3p	MIMAT0000078	CSDE1	7812	CLASH	23622248	Unspecified
hsa-mir-23a-3p	MIMAT0000078	ADAM9	8754	CLASH	23622248	Unspecified
hsa-mir-23a-3p	MIMAT0000078	HS2ST1	9653	HITS-CLIP//PAR-CLIP	23446348|21572407|20371350	Unspecified
hsa-mir-23a-3p	MIMAT0000078	LMAN2	10960	PAR-CLIP	20371350	Unspecified
hsa-mir-23a-3p	MIMAT0000078	TOR1AIP1	26092	PAR-CLIP	22012620	Unspecified
hsa-mir-23a-3p	MIMAT0000078	FASTKD5	60493	CLASH	23622248	Unspecified
hsa-mir-23a-3p	MIMAT0000078	TRIM59	286827	PAR-CLIP	21572407	Unspecified
hsa-mir-24-1-5p	MIMAT0000079	LARP1	23367	PAR-CLIP	26701625	Unspecified
hsa-mir-24-3p	MIMAT0000080	ATP6V1A	523	HITS-CLIP	23824327	Unspecified
hsa-mir-24-3p	MIMAT0000080	GGCX	2677	HITS-CLIP	23824327	Unspecified
hsa-mir-24-3p	MIMAT0000080	HMOX1	3162	Luciferase reporter assay//Western blot	24854275	Unspecified
hsa-mir-24-3p	MIMAT0000080	PRIM1	5557	Microarray	19748357	Unspecified
hsa-mir-24-3p	MIMAT0000080	RAB5C	5878	PAR-CLIP	27292025	Unspecified
hsa-mir-24-3p	MIMAT0000080	RALA	5898	Microarray	19748357	Unspecified
hsa-mir-24-3p	MIMAT0000080	SRP19	6728	HITS-CLIP	23824327	Unspecified
hsa-mir-24-3p	MIMAT0000080	EIF4H	7458	Microarray	19748357	Unspecified
hsa-mir-24-3p	MIMAT0000080	DCAF7	10238	HITS-CLIP	23824327	Unspecified
hsa-mir-24-3p	MIMAT0000080	CWC27	10283	Microarray	19748357	Unspecified
hsa-mir-24-3p	MIMAT0000080	SLU7	10569	HITS-CLIP	23824327	Unspecified
hsa-mir-24-3p	MIMAT0000080	TUBGCP2	10844	Microarray	19748357	Unspecified
hsa-mir-24-3p	MIMAT0000080	EXOSC8	11340	Microarray	19748357	Unspecified
hsa-mir-24-3p	MIMAT0000080	PMPCA	23203	HITS-CLIP	23824327|27418678	Unspecified
hsa-mir-24-3p	MIMAT0000080	EXOSC2	23404	HITS-CLIP	23824327	Unspecified
hsa-mir-24-3p	MIMAT0000080	POLA2	23649	HITS-CLIP	23824327	Unspecified
hsa-mir-24-3p	MIMAT0000080	ALG5	29880	Microarray	19748357	Unspecified
hsa-mir-24-3p	MIMAT0000080	NUP54	53371	Microarray//Sequencing	20371350|19748357	Unspecified
hsa-mir-24-3p	MIMAT0000080	ERGIC1	57222	HITS-CLIP	23824327	Unspecified
hsa-mir-25-3p	MIMAT0000081	ETFA	2108	CLASH	23622248	Unspecified
hsa-mir-25-3p	MIMAT0000081	GGCX	2677	PAR-CLIP	27292025	Unspecified
hsa-mir-25-3p	MIMAT0000081	GOLGA3	2802	PAR-CLIP	22012620|21572407	Unspecified
hsa-mir-25-3p	MIMAT0000081	ITGB1	3688	CLASH	23622248	Unspecified
hsa-mir-25-3p	MIMAT0000081	UBAP2L	9898	CLASH	23622248	Unspecified
hsa-mir-25-3p	MIMAT0000081	ZDHHC5	25921	HITS-CLIP	23824327	Unspecified
hsa-mir-25-3p	MIMAT0000081	PLEKHA5	54477	CLASH	23622248	Unspecified
hsa-mir-25-3p	MIMAT0000081	RBM28	55131	HITS-CLIP//PAR-CLIP	23706177|27292025	Unspecified
hsa-mir-25-3p	MIMAT0000081	PTGES2	80142	PAR-CLIP	23592263	Unspecified
hsa-mir-25-3p	MIMAT0000081	PRRC2B	84726	PAR-CLIP	20371350	Unspecified
hsa-mir-26a-5p	MIMAT0000082	DNMT1	1786	CLASH	23622248	Unspecified
hsa-mir-26a-5p	MIMAT0000082	ACSL3	2181	HITS-CLIP	22473208	Unspecified
hsa-mir-26a-5p	MIMAT0000082	PLOD2	5352	Luciferase reporter assay	26983694|27310702	Unspecified
hsa-mir-26a-5p	MIMAT0000082	PDE4DIP	9659	HITS-CLIP	19536157	Unspecified
hsa-mir-26a-5p	MIMAT0000082	DCAF7	10238	CLASH	23622248	Unspecified
hsa-mir-26a-5p	MIMAT0000082	RAB18	22931	CLASH	23622248	Unspecified
hsa-mir-26a-5p	MIMAT0000082	LARP1	23367	Immunohistochemistry//Luciferase reporter assay//qRT-PCR//Western blot	26063484	Unspecified
hsa-mir-26a-5p	MIMAT0000082	C1orf50	79078	HITS-CLIP	23824327	Unspecified
hsa-mir-26a-5p	MIMAT0000082	EDEM3	80267	PAR-CLIP	23592263	Unspecified
hsa-mir-26a-5p	MIMAT0000082	TIMM29	90580	HITS-CLIP	23824327	Unspecified
hsa-mir-26b-5p	MIMAT0000083	ACADM	34	Microarray	19088304	Unspecified
hsa-mir-26b-5p	MIMAT0000083	ATP6V1A	523	Microarray	19088304	Unspecified
hsa-mir-26b-5p	MIMAT0000083	ATP6AP1	537	Microarray	19088304	Unspecified
hsa-mir-26b-5p	MIMAT0000083	ACSL3	2181	HITS-CLIP	22473208	Unspecified
hsa-mir-26b-5p	MIMAT0000083	HMOX1	3162	Microarray	19088304	Unspecified
hsa-mir-26b-5p	MIMAT0000083	RAB8A	4218	Microarray	19088304	Unspecified
hsa-mir-26b-5p	MIMAT0000083	PCNT	5116	Microarray	19088304	Unspecified
hsa-mir-26b-5p	MIMAT0000083	PLOD2	5352	Luciferase reporter assay//Microarray	19088304|27310702	Unspecified
hsa-mir-26b-5p	MIMAT0000083	POLA1	5422	Microarray	19088304	Unspecified
hsa-mir-26b-5p	MIMAT0000083	PPT1	5538	Microarray	19088304	Unspecified
hsa-mir-26b-5p	MIMAT0000083	TCF12	6938	Microarray	19088304	Unspecified
hsa-mir-26b-5p	MIMAT0000083	RAE1	8480	Microarray	19088304	Unspecified
hsa-mir-26b-5p	MIMAT0000083	ADAM9	8754	Microarray	19088304	Unspecified
hsa-mir-26b-5p	MIMAT0000083	GGH	8836	Microarray	19088304	Unspecified
hsa-mir-26b-5p	MIMAT0000083	ADAMTS1	9510	Microarray	19088304	Unspecified
hsa-mir-26b-5p	MIMAT0000083	PDE4DIP	9659	HITS-CLIP	19536157	Unspecified
hsa-mir-26b-5p	MIMAT0000083	G3BP2	9908	Sequencing	20371350	Unspecified
hsa-mir-26b-5p	MIMAT0000083	FBLN5	10516	Microarray	19088304	Unspecified
hsa-mir-26b-5p	MIMAT0000083	YIF1A	10897	Microarray	19088304	Unspecified
hsa-mir-26b-5p	MIMAT0000083	CNTRL	11064	Microarray	19088304	Unspecified
hsa-mir-26b-5p	MIMAT0000083	ERC1	23085	Microarray	19088304	Unspecified
hsa-mir-26b-5p	MIMAT0000083	PMPCA	23203	Microarray	19088304	Unspecified
hsa-mir-26b-5p	MIMAT0000083	WASHC4	23325	Microarray	19088304	Unspecified
hsa-mir-26b-5p	MIMAT0000083	DPY19L1	23333	Microarray	19088304	Unspecified
hsa-mir-26b-5p	MIMAT0000083	LARP1	23367	Immunohistochemistry//Luciferase reporter assay//qRT-PCR//Western blot	26063484	Unspecified
hsa-mir-26b-5p	MIMAT0000083	BRD4	23476	Microarray	19088304	Unspecified
hsa-mir-26b-5p	MIMAT0000083	FAM98A	25940	Microarray	19088304	Unspecified
hsa-mir-26b-5p	MIMAT0000083	TIMM10	26519	Microarray	19088304	Unspecified
hsa-mir-26b-5p	MIMAT0000083	MAT2B	27430	Microarray	19088304	Unspecified
hsa-mir-26b-5p	MIMAT0000083	STOML2	30968	Microarray	19088304	Unspecified
hsa-mir-26b-5p	MIMAT0000083	TMED5	50999	Microarray	19088304	Unspecified
hsa-mir-26b-5p	MIMAT0000083	MRPS2	51116	Microarray	19088304	Unspecified
hsa-mir-26b-5p	MIMAT0000083	RBM41	55285	Microarray	19088304	Unspecified
hsa-mir-26b-5p	MIMAT0000083	DNAJC11	55735	Sequencing	20371350	Unspecified
hsa-mir-26b-5p	MIMAT0000083	DCTPP1	79077	Microarray	19088304	Unspecified
hsa-mir-26b-5p	MIMAT0000083	C1orf50	79078	HITS-CLIP	23824327	Unspecified
hsa-mir-26b-5p	MIMAT0000083	CHPF	79586	Microarray	19088304	Unspecified
hsa-mir-26b-5p	MIMAT0000083	NARS2	79731	Microarray	19088304	Unspecified
hsa-mir-26b-5p	MIMAT0000083	EDEM3	80267	PAR-CLIP	23592263	Unspecified
hsa-mir-26b-5p	MIMAT0000083	TIMM29	90580	HITS-CLIP	23824327	Unspecified
hsa-mir-26b-5p	MIMAT0000083	NEK9	91754	Microarray	19088304	Unspecified
hsa-mir-27a-3p	MIMAT0000084	DCAF7	10238	PAR-CLIP	23592263|21572407|20371350	Unspecified
hsa-mir-27a-3p	MIMAT0000084	ERC1	23085	PAR-CLIP	23592263	Unspecified
hsa-mir-27a-3p	MIMAT0000084	MRPS27	23107	PAR-CLIP	23592263	Unspecified
hsa-mir-27a-3p	MIMAT0000084	SUN2	25777	CLASH	23622248	Unspecified
hsa-mir-27a-3p	MIMAT0000084	TIMM10	26519	HITS-CLIP	23824327	Unspecified
hsa-mir-27a-3p	MIMAT0000084	TMED5	50999	HITS-CLIP//PAR-CLIP	22473208|23592263|24398324|24906430	Unspecified
hsa-mir-27a-3p	MIMAT0000084	RAB14	51552	PAR-CLIP	23592263|24398324	Unspecified
hsa-mir-27a-3p	MIMAT0000084	PIGO	84720	HITS-CLIP//PAR-CLIP	23592263|24398324|23446348|21572407|20371350|23824327|27292025	Unspecified
hsa-mir-28-5p	MIMAT0000085	G3BP1	10146	PAR-CLIP	23592263|21572407	Unspecified
hsa-mir-28-5p	MIMAT0000085	CRTC3	64784	HITS-CLIP	23313552	Unspecified
hsa-mir-28-5p	MIMAT0000085	PRRC2B	84726	PAR-CLIP	26701625	Unspecified
hsa-mir-29a-3p	MIMAT0000086	DNMT1	1786	ChIP-seq//Microarray//qRT-PCR//Western blot	23789939|26251039	Unspecified
hsa-mir-29a-3p	MIMAT0000086	FBN1	2200	Immunofluorescence//Luciferase reporter assay//Western blot	22745231|25241894	Unspecified
hsa-mir-29a-3p	MIMAT0000086	ITGB1	3688	Luciferase reporter assay//qRT-PCR//Western blot	26903137	Unspecified
hsa-mir-29a-3p	MIMAT0000086	LOX	4015	Luciferase reporter assay	22745231	Unspecified
hsa-mir-29a-3p	MIMAT0000086	PPT1	5538	CLASH	23622248	Unspecified
hsa-mir-29a-3p	MIMAT0000086	GOLGA7	51125	PAR-CLIP	22012620	Unspecified
hsa-mir-29a-3p	MIMAT0000086	PIGS	94005	HITS-CLIP	23824327	Unspecified
hsa-mir-30a-5p	MIMAT0000087	ARF6	382	Proteomics	18668040	Unspecified
hsa-mir-30a-5p	MIMAT0000087	DDX10	1662	Proteomics	18668040	Unspecified
hsa-mir-30a-5p	MIMAT0000087	DNMT1	1786	Luciferase reporter assay//Western blot	28222434	Unspecified
hsa-mir-30a-5p	MIMAT0000087	FBN1	2200	Proteomics	18668040	Unspecified
hsa-mir-30a-5p	MIMAT0000087	GNG5	2787	Proteomics	18668040	Unspecified
hsa-mir-30a-5p	MIMAT0000087	LOX	4015	Immunohistochemistry//Luciferase reporter assay//Western blot	25488748	Unspecified
hsa-mir-30a-5p	MIMAT0000087	PCNT	5116	Proteomics	18668040	Unspecified
hsa-mir-30a-5p	MIMAT0000087	PRIM1	5557	Proteomics	18668040	Unspecified
hsa-mir-30a-5p	MIMAT0000087	REEP5	7905	Proteomics	18668040	Unspecified
hsa-mir-30a-5p	MIMAT0000087	ADAM9	8754	HITS-CLIP	23313552	Unspecified
hsa-mir-30a-5p	MIMAT0000087	CEP350	9857	HITS-CLIP	22473208	Unspecified
hsa-mir-30a-5p	MIMAT0000087	G3BP1	10146	Proteomics//pSILAC	18668040	Unspecified
hsa-mir-30a-5p	MIMAT0000087	RAB10	10890	PAR-CLIP	21572407	Unspecified
hsa-mir-30a-5p	MIMAT0000087	ERP44	23071	CLASH	23622248	Unspecified
hsa-mir-30a-5p	MIMAT0000087	CLCC1	23155	HITS-CLIP	22473208	Unspecified
hsa-mir-30a-5p	MIMAT0000087	LARP4B	23185	Proteomics	18668040	Unspecified
hsa-mir-30a-5p	MIMAT0000087	DPY19L1	23333	Proteomics//pSILAC	18668040	Unspecified
hsa-mir-30a-5p	MIMAT0000087	LARP1	23367	PAR-CLIP	23592263|24398324|20371350	Unspecified
hsa-mir-30a-5p	MIMAT0000087	HECTD1	25831	Proteomics	18668040	Unspecified
hsa-mir-30a-5p	MIMAT0000087	TIMM10	26519	Proteomics	18668040	Unspecified
hsa-mir-30a-5p	MIMAT0000087	TIMM9	26520	Proteomics	18668040	Unspecified
hsa-mir-30a-5p	MIMAT0000087	PABPC1	26986	Proteomics	18668040	Unspecified
hsa-mir-30a-5p	MIMAT0000087	TMED5	50999	Proteomics	18668040	Unspecified
hsa-mir-30a-5p	MIMAT0000087	NDUFAF1	51103	Proteomics	18668040	Unspecified
hsa-mir-30a-5p	MIMAT0000087	FAM8A1	51439	PAR-CLIP	21572407	Unspecified
hsa-mir-30a-5p	MIMAT0000087	RAB14	51552	Proteomics	18668040	Unspecified
hsa-mir-30a-5p	MIMAT0000087	MIB1	57534	HITS-CLIP	22473208	Unspecified
hsa-mir-30a-5p	MIMAT0000087	MRPS5	64969	Proteomics	18668040	Unspecified
hsa-mir-30a-5p	MIMAT0000087	FYCO1	79443	PAR-CLIP	21572407	Unspecified
hsa-mir-30a-3p	MIMAT0000088	NUP98	4928	CLASH	23622248	Unspecified
hsa-mir-30a-3p	MIMAT0000088	EXOSC2	23404	CLASH	23622248	Unspecified
hsa-mir-30a-3p	MIMAT0000088	NIN	51199	PAR-CLIP	23592263|21572407	Unspecified
hsa-mir-30a-3p	MIMAT0000088	CCDC86	79080	PAR-CLIP	23592263	Unspecified
hsa-mir-31-5p	MIMAT0000089	RHOA	387	Immunohistochemistry//In situ hybridization//Luciferase reporter assay//qRT-PCR//Western blot	19524507|22854067|22736314|27904131	Unspecified
hsa-mir-31-5p	MIMAT0000089	RDX	5962	Luciferase reporter assay//qRT-PCR//Western blot	19524507|22089331	Unspecified
hsa-mir-31-5p	MIMAT0000089	TOR1AIP1	26092	PAR-CLIP	21572407	Unspecified
hsa-mir-31-5p	MIMAT0000089	AKAP8L	26993	CLASH	23622248	Unspecified
hsa-mir-31-5p	MIMAT0000089	GHITM	27069	CLASH	23622248	Unspecified
hsa-mir-31-5p	MIMAT0000089	STOML2	30968	CLASH	23622248	Unspecified
hsa-mir-31-5p	MIMAT0000089	NDFIP2	54602	CLASH	23622248	Unspecified
hsa-mir-31-5p	MIMAT0000089	EXOSC5	56915	CLASH	23622248	Unspecified
hsa-mir-31-5p	MIMAT0000089	PRRC2B	84726	PAR-CLIP	26701625	Unspecified
hsa-mir-31-5p	MIMAT0000089	ZC3H18	124245	CLASH	23622248	Unspecified
hsa-mir-31-5p	MIMAT0000089	RETREG3	162427	CLASH	23622248	Unspecified
hsa-mir-32-5p	MIMAT0000090	GGCX	2677	PAR-CLIP	27292025	Unspecified
hsa-mir-32-5p	MIMAT0000090	GOLGA3	2802	HITS-CLIP//PAR-CLIP//Sequencing	20371350|22473208|22012620|21572407	Unspecified
hsa-mir-32-5p	MIMAT0000090	G3BP2	9908	HITS-CLIP	22473208	Unspecified
hsa-mir-32-5p	MIMAT0000090	HECTD1	25831	HITS-CLIP	22473208	Unspecified
hsa-mir-32-5p	MIMAT0000090	ZDHHC5	25921	HITS-CLIP//Sequencing	20371350|22473208|23824327	Unspecified
hsa-mir-32-5p	MIMAT0000090	RBM28	55131	HITS-CLIP//PAR-CLIP	23706177|27292025	Unspecified
hsa-mir-32-5p	MIMAT0000090	PTGES2	80142	PAR-CLIP//Sequencing	20371350|23592263	Unspecified
hsa-mir-32-5p	MIMAT0000090	PRRC2B	84726	HITS-CLIP//PAR-CLIP	22473208|20371350	Unspecified
hsa-mir-33a-5p	MIMAT0000091	ADAM9	8754	Immunohistochemistry//Luciferase reporter assay//qRT-PCR//Western blot	26507842	Unspecified
hsa-mir-33a-5p	MIMAT0000091	ERO1B	56605	Sequencing	20371350	Unspecified
hsa-mir-33a-5p	MIMAT0000091	RTN4	57142	Sequencing	20371350	Unspecified
hsa-mir-92a-3p	MIMAT0000092	BCS1L	617	CLASH	23622248	Unspecified
hsa-mir-92a-3p	MIMAT0000092	SCARB1	949	CLASH	23622248	Unspecified
hsa-mir-92a-3p	MIMAT0000092	CYB5R3	1727	CLASH	23622248	Unspecified
hsa-mir-92a-3p	MIMAT0000092	DNMT1	1786	Luciferase reporter assay	23306545	Unspecified
hsa-mir-92a-3p	MIMAT0000092	ETFA	2108	CLASH	23622248	Unspecified
hsa-mir-92a-3p	MIMAT0000092	GGCX	2677	PAR-CLIP	27292025	Unspecified
hsa-mir-92a-3p	MIMAT0000092	GOLGA3	2802	CLASH//HITS-CLIP//PAR-CLIP	23622248|22473208|22012620|21572407	Unspecified
hsa-mir-92a-3p	MIMAT0000092	HDAC2	3066	Luciferase reporter assay	27884646	Unspecified
hsa-mir-92a-3p	MIMAT0000092	RAB8A	4218	CLASH	23622248	Unspecified
hsa-mir-92a-3p	MIMAT0000092	POR	5447	CLASH	23622248	Unspecified
hsa-mir-92a-3p	MIMAT0000092	BRD2	6046	CLASH	23622248	Unspecified
hsa-mir-92a-3p	MIMAT0000092	ELOB	6923	CLASH	23622248	Unspecified
hsa-mir-92a-3p	MIMAT0000092	TLE3	7090	CLASH	23622248	Unspecified
hsa-mir-92a-3p	MIMAT0000092	NSD2	7468	CLASH	23622248	Unspecified
hsa-mir-92a-3p	MIMAT0000092	CSDE1	7812	CLASH	23622248	Unspecified
hsa-mir-92a-3p	MIMAT0000092	USP13	8975	CLASH	23622248	Unspecified
hsa-mir-92a-3p	MIMAT0000092	RRP9	9136	CLASH	23622248	Unspecified
hsa-mir-92a-3p	MIMAT0000092	ADAMTS1	9510	CLASH	23622248	Unspecified
hsa-mir-92a-3p	MIMAT0000092	PDE4DIP	9659	CLASH	23622248	Unspecified
hsa-mir-92a-3p	MIMAT0000092	UBAP2L	9898	CLASH	23622248	Unspecified
hsa-mir-92a-3p	MIMAT0000092	G3BP2	9908	CLASH//HITS-CLIP	23622248|22473208	Unspecified
hsa-mir-92a-3p	MIMAT0000092	RBX1	9978	CLASH	23622248	Unspecified
hsa-mir-92a-3p	MIMAT0000092	PITRM1	10531	CLASH	23622248	Unspecified
hsa-mir-92a-3p	MIMAT0000092	NPC2	10577	CLASH	23622248	Unspecified
hsa-mir-92a-3p	MIMAT0000092	TUBGCP2	10844	CLASH	23622248	Unspecified
hsa-mir-92a-3p	MIMAT0000092	CIT	11113	CLASH	23622248	Unspecified
hsa-mir-92a-3p	MIMAT0000092	MYCBP2	23077	Luciferase reporter assay//Western blot	27620505	Unspecified
hsa-mir-92a-3p	MIMAT0000092	MDN1	23195	CLASH	23622248	Unspecified
hsa-mir-92a-3p	MIMAT0000092	NUP210	23225	CLASH	23622248	Unspecified
hsa-mir-92a-3p	MIMAT0000092	LARP1	23367	CLASH	23622248	Unspecified
hsa-mir-92a-3p	MIMAT0000092	IL17RA	23765	CLASH	23622248	Unspecified
hsa-mir-92a-3p	MIMAT0000092	HECTD1	25831	HITS-CLIP	22473208	Unspecified
hsa-mir-92a-3p	MIMAT0000092	ZDHHC5	25921	HITS-CLIP	22473208|23824327	Unspecified
hsa-mir-92a-3p	MIMAT0000092	GHITM	27069	CLASH	23622248	Unspecified
hsa-mir-92a-3p	MIMAT0000092	RBM28	55131	HITS-CLIP//PAR-CLIP	23706177|27292025	Unspecified
hsa-mir-92a-3p	MIMAT0000092	ERGIC1	57222	CLASH	23622248	Unspecified
hsa-mir-92a-3p	MIMAT0000092	CRTC3	64784	CLASH	23622248	Unspecified
hsa-mir-92a-3p	MIMAT0000092	CCDC86	79080	CLASH	23622248	Unspecified
hsa-mir-92a-3p	MIMAT0000092	FYCO1	79443	CLASH	23622248	Unspecified
hsa-mir-92a-3p	MIMAT0000092	PTGES2	80142	PAR-CLIP	23592263	Unspecified
hsa-mir-92a-3p	MIMAT0000092	PRRC2B	84726	CLASH//HITS-CLIP//PAR-CLIP	23622248|22473208|20371350	Unspecified
hsa-mir-92a-3p	MIMAT0000092	ZNF503	84858	CLASH	23622248	Unspecified
hsa-mir-92a-3p	MIMAT0000092	PIGS	94005	CLASH	23622248	Unspecified
hsa-mir-92a-3p	MIMAT0000092	ZC3H18	124245	CLASH	23622248	Unspecified
hsa-mir-92a-3p	MIMAT0000092	QSOX2	169714	CLASH	23622248	Unspecified
hsa-mir-93-5p	MIMAT0000093	AP2A2	161	CLASH	23622248	Unspecified
hsa-mir-93-5p	MIMAT0000093	MARK2	2011	CLASH	23622248	Unspecified
hsa-mir-93-5p	MIMAT0000093	F2RL1	2150	HITS-CLIP	23313552	Unspecified
hsa-mir-93-5p	MIMAT0000093	GOLGA2	2801	HITS-CLIP	19536157	Unspecified
hsa-mir-93-5p	MIMAT0000093	ITGB1	3688	PAR-CLIP	20371350	Unspecified
hsa-mir-93-5p	MIMAT0000093	NUP98	4928	HITS-CLIP	22473208	Unspecified
hsa-mir-93-5p	MIMAT0000093	PRIM1	5557	HITS-CLIP//PAR-CLIP	23446348|23313552	Unspecified
hsa-mir-93-5p	MIMAT0000093	PVR	5817	PAR-CLIP	21572407|20371350	Unspecified
hsa-mir-93-5p	MIMAT0000093	UPF1	5976	CLASH	23622248	Unspecified
hsa-mir-93-5p	MIMAT0000093	ELOC	6921	HITS-CLIP	23824327	Unspecified
hsa-mir-93-5p	MIMAT0000093	TLE3	7090	CLASH	23622248	Unspecified
hsa-mir-93-5p	MIMAT0000093	EIF4H	7458	PAR-CLIP	22012620|21572407|20371350	Unspecified
hsa-mir-93-5p	MIMAT0000093	NSD2	7468	HITS-CLIP	22473208	Unspecified
hsa-mir-93-5p	MIMAT0000093	CSDE1	7812	PAR-CLIP	21572407	Unspecified
hsa-mir-93-5p	MIMAT0000093	REEP5	7905	HITS-CLIP	22473208	Unspecified
hsa-mir-93-5p	MIMAT0000093	STC2	8614	Sequencing	20371350	Unspecified
hsa-mir-93-5p	MIMAT0000093	NUP58	9818	Sequencing	20371350	Unspecified
hsa-mir-93-5p	MIMAT0000093	UBAP2L	9898	CLASH	23622248	Unspecified
hsa-mir-93-5p	MIMAT0000093	RAB10	10890	PAR-CLIP	21572407|20371350|27292025	Unspecified
hsa-mir-93-5p	MIMAT0000093	CIT	11113	HITS-CLIP	22473208	Unspecified
hsa-mir-93-5p	MIMAT0000093	EMC1	23065	PAR-CLIP	22100165	Unspecified
hsa-mir-93-5p	MIMAT0000093	POFUT1	23509	HITS-CLIP	22473208	Unspecified
hsa-mir-93-5p	MIMAT0000093	ZC3H7A	29066	CLASH	23622248	Unspecified
hsa-mir-93-5p	MIMAT0000093	NIN	51199	PAR-CLIP//Sequencing	20371350|23592263|21572407	Unspecified
hsa-mir-93-5p	MIMAT0000093	PDZD11	51248	HITS-CLIP//Sequencing	20371350|22473208	Unspecified
hsa-mir-93-5p	MIMAT0000093	HOOK1	51361	Sequencing	20371350	Unspecified
hsa-mir-93-5p	MIMAT0000093	FKBP7	51661	Sequencing	20371350	Unspecified
hsa-mir-93-5p	MIMAT0000093	RBM41	55285	HITS-CLIP	23313552	Unspecified
hsa-mir-93-5p	MIMAT0000093	SMOC1	64093	PAR-CLIP	21572407	Unspecified
hsa-mir-93-5p	MIMAT0000093	CRTC3	64784	HITS-CLIP	22473208	Unspecified
hsa-mir-93-5p	MIMAT0000093	C1orf50	79078	HITS-CLIP	23313552	Unspecified
hsa-mir-93-5p	MIMAT0000093	FYCO1	79443	HITS-CLIP//Sequencing	20371350|22473208	Unspecified
hsa-mir-93-5p	MIMAT0000093	CLIP4	79745	PAR-CLIP	20371350	Unspecified
hsa-mir-93-5p	MIMAT0000093	FOXRED2	80020	CLASH//HITS-CLIP	23622248|23313552	Unspecified
hsa-mir-93-5p	MIMAT0000093	PIGO	84720	HITS-CLIP	22473208	Unspecified
hsa-mir-93-5p	MIMAT0000093	SLC30A7	148867	PAR-CLIP	23592263	Unspecified
hsa-mir-93-5p	MIMAT0000093	TYSND1	219743	CLASH	23622248	Unspecified
hsa-mir-95-3p	MIMAT0000094	NSD2	7468	PAR-CLIP	23592263|21572407	Unspecified
hsa-mir-96-5p	MIMAT0000095	SCARB1	949	Luciferase reporter assay	23459944	Unspecified
hsa-mir-96-5p	MIMAT0000095	LOX	4015	PAR-CLIP	27292025	Unspecified
hsa-mir-96-5p	MIMAT0000095	NPTX1	4884	HITS-CLIP	23824327	Unspecified
hsa-mir-96-5p	MIMAT0000095	EXOSC2	23404	HITS-CLIP	23824327	Unspecified
hsa-mir-96-5p	MIMAT0000095	MIPOL1	145282	HITS-CLIP	19536157	Unspecified
hsa-mir-98-5p	MIMAT0000096	ACADM	34	qRT-PCR	17942906	Unspecified
hsa-mir-98-5p	MIMAT0000096	DDX10	1662	Microarray	19088304	Unspecified
hsa-mir-98-5p	MIMAT0000096	CYB5R3	1727	Microarray	19088304	Unspecified
hsa-mir-98-5p	MIMAT0000096	GNG5	2787	Microarray//PAR-CLIP	19088304|20371350|27292025	Unspecified
hsa-mir-98-5p	MIMAT0000096	ABCC1	4363	Microarray	19088304	Unspecified
hsa-mir-98-5p	MIMAT0000096	NUP98	4928	Microarray	19088304	Unspecified
hsa-mir-98-5p	MIMAT0000096	PLOD2	5352	Microarray	19088304	Unspecified
hsa-mir-98-5p	MIMAT0000096	PRIM2	5558	HITS-CLIP	23706177	Unspecified
hsa-mir-98-5p	MIMAT0000096	RDX	5962	PAR-CLIP	23446348|21572407|26701625	Unspecified
hsa-mir-98-5p	MIMAT0000096	AGPS	8540	Microarray	19088304	Unspecified
hsa-mir-98-5p	MIMAT0000096	STC2	8614	Microarray	19088304	Unspecified
hsa-mir-98-5p	MIMAT0000096	PABPC4	8761	Microarray	19088304	Unspecified
hsa-mir-98-5p	MIMAT0000096	EIF4E2	9470	Microarray	19088304	Unspecified
hsa-mir-98-5p	MIMAT0000096	CEP135	9662	PAR-CLIP	24398324	Unspecified
hsa-mir-98-5p	MIMAT0000096	AKAP8	10270	PAR-CLIP	21572407|20371350	Unspecified
hsa-mir-98-5p	MIMAT0000096	SIGMAR1	10280	Microarray	19088304	Unspecified
hsa-mir-98-5p	MIMAT0000096	PMPCA	23203	PAR-CLIP	21572407|20371350	Unspecified
hsa-mir-98-5p	MIMAT0000096	PLD3	23646	PAR-CLIP	26701625	Unspecified
hsa-mir-98-5p	MIMAT0000096	TMED5	50999	HITS-CLIP//PAR-CLIP	23592263|24906430	Unspecified
hsa-mir-98-5p	MIMAT0000096	MRPS2	51116	Microarray	19088304	Unspecified
hsa-mir-98-5p	MIMAT0000096	CHPF2	54480	Microarray	19088304	Unspecified
hsa-mir-98-5p	MIMAT0000096	ALG8	79053	Microarray	19088304	Unspecified
hsa-mir-98-5p	MIMAT0000096	ATP13A3	79572	Microarray	19088304	Unspecified
hsa-mir-98-5p	MIMAT0000096	COLGALT1	79709	Microarray	19088304	Unspecified
hsa-mir-98-5p	MIMAT0000096	EDEM3	80267	HITS-CLIP	23313552	Unspecified
hsa-mir-98-5p	MIMAT0000096	GRPEL1	80273	Microarray	19088304	Unspecified
hsa-mir-98-5p	MIMAT0000096	INHBE	83729	Microarray	19088304	Unspecified
hsa-mir-98-5p	MIMAT0000096	RETREG3	162427	Microarray	19088304	Unspecified
hsa-mir-99a-5p	MIMAT0000097	MARK2	2011	CLASH	23622248	Unspecified
hsa-mir-99a-5p	MIMAT0000097	GOLGA3	2802	CLASH	23622248	Unspecified
hsa-mir-99a-5p	MIMAT0000097	CUL2	8453	CLASH	23622248	Unspecified
hsa-mir-99a-5p	MIMAT0000097	LMAN2	10960	CLASH	23622248	Unspecified
hsa-mir-99a-5p	MIMAT0000097	FOXRED2	80020	CLASH	23622248	Unspecified
hsa-mir-100-5p	MIMAT0000098	DNMT1	1786	CLASH	23622248	Unspecified
hsa-mir-100-5p	MIMAT0000098	ACSL3	2181	CLASH	23622248	Unspecified
hsa-mir-100-5p	MIMAT0000098	GNG5	2787	CLASH	23622248	Unspecified
hsa-mir-100-5p	MIMAT0000098	RAB5C	5878	CLASH	23622248	Unspecified
hsa-mir-100-5p	MIMAT0000098	CUL2	8453	CLASH	23622248	Unspecified
hsa-mir-100-5p	MIMAT0000098	DDX21	9188	CLASH	23622248	Unspecified
hsa-mir-100-5p	MIMAT0000098	SEPSECS	51091	CLASH	23622248	Unspecified
hsa-mir-100-5p	MIMAT0000098	MAP7D1	55700	CLASH	23622248	Unspecified
hsa-mir-101-3p	MIMAT0000099	RHOA	387	Luciferase reporter assay//qRT-PCR//Western blot	28109909	Unspecified
hsa-mir-101-3p	MIMAT0000099	FBN2	2201	Western blot	19008416	Unspecified
hsa-mir-101-3p	MIMAT0000099	GNB1	2782	PAR-CLIP//Sequencing	20371350|21572407	Unspecified
hsa-mir-101-3p	MIMAT0000099	REEP5	7905	Sequencing	20371350	Unspecified
hsa-mir-101-3p	MIMAT0000099	G3BP1	10146	PAR-CLIP	23592263|21572407	Unspecified
hsa-mir-101-3p	MIMAT0000099	TOR1AIP1	26092	Sequencing	20371350	Unspecified
hsa-mir-101-3p	MIMAT0000099	TMED5	50999	HITS-CLIP//PAR-CLIP	23592263|24906430	Unspecified
hsa-mir-101-3p	MIMAT0000099	GOLGA7	51125	PAR-CLIP	21572407	Unspecified
hsa-mir-101-3p	MIMAT0000099	RTN4	57142	Sequencing	20371350	Unspecified
hsa-mir-29b-3p	MIMAT0000100	DNMT1	1786	immunoblot//Luciferase reporter assay//qRT-PCR//Western blot	19211935|23179556	Unspecified
hsa-mir-29b-3p	MIMAT0000100	FBN1	2200	Luciferase reporter assay	22745231	Unspecified
hsa-mir-29b-3p	MIMAT0000100	ITGB1	3688	Luciferase reporter assay//qRT-PCR	23354167	Unspecified
hsa-mir-29b-3p	MIMAT0000100	LOX	4015	Luciferase reporter assay//qRT-PCR	23354167|22745231|25744716	Unspecified
hsa-mir-29b-3p	MIMAT0000100	CIT	11113	CLASH	23622248	Unspecified
hsa-mir-29b-3p	MIMAT0000100	GOLGA7	51125	PAR-CLIP	22012620	Unspecified
hsa-mir-29b-3p	MIMAT0000100	PIGS	94005	HITS-CLIP	23824327	Unspecified
hsa-mir-103a-3p	MIMAT0000101	ARF6	382	Sequencing	20371350	Unspecified
hsa-mir-103a-3p	MIMAT0000101	GNB1	2782	Sequencing	20371350	Unspecified
hsa-mir-103a-3p	MIMAT0000101	PRKAR2A	5576	Sequencing	20371350	Unspecified
hsa-mir-103a-3p	MIMAT0000101	G3BP2	9908	PAR-CLIP//Sequencing	20371350|23446348|21572407	Unspecified
hsa-mir-103a-3p	MIMAT0000101	BCKDK	10295	Sequencing	20371350	Unspecified
hsa-mir-103a-3p	MIMAT0000101	RAB10	10890	PAR-CLIP	21572407|26701625	Unspecified
hsa-mir-103a-3p	MIMAT0000101	LARP4B	23185	Sequencing	20371350	Unspecified
hsa-mir-103a-3p	MIMAT0000101	SUN2	25777	PAR-CLIP//Sequencing	20371350|21572407	Unspecified
hsa-mir-103a-3p	MIMAT0000101	FAM98A	25940	PAR-CLIP//Sequencing	20371350|24398324|23446348|21572407	Unspecified
hsa-mir-103a-3p	MIMAT0000101	NIN	51199	Sequencing	20371350	Unspecified
hsa-mir-103a-3p	MIMAT0000101	MIB1	57534	Sequencing	20371350	Unspecified
hsa-mir-103a-3p	MIMAT0000101	GCC1	79571	HITS-CLIP//Sequencing	20371350|23824327	Unspecified
hsa-mir-103a-3p	MIMAT0000101	ATP13A3	79572	PAR-CLIP//Sequencing	20371350|21572407	Unspecified
hsa-mir-103a-3p	MIMAT0000101	PLEKHF2	79666	PAR-CLIP	24398324|21572407	Unspecified
hsa-mir-103a-3p	MIMAT0000101	SLC30A7	148867	PAR-CLIP	20371350	Unspecified
hsa-mir-105-5p	MIMAT0000102	NPTX1	4884	HITS-CLIP	23824327	Unspecified
hsa-mir-106a-5p	MIMAT0000103	F2RL1	2150	HITS-CLIP	23313552	Unspecified
hsa-mir-106a-5p	MIMAT0000103	GNB1	2782	CLASH	23622248	Unspecified
hsa-mir-106a-5p	MIMAT0000103	GOLGA2	2801	HITS-CLIP	19536157	Unspecified
hsa-mir-106a-5p	MIMAT0000103	ITGB1	3688	PAR-CLIP	20371350	Unspecified
hsa-mir-106a-5p	MIMAT0000103	PRIM1	5557	HITS-CLIP//PAR-CLIP	23446348|23313552	Unspecified
hsa-mir-106a-5p	MIMAT0000103	PVR	5817	PAR-CLIP	21572407|20371350	Unspecified
hsa-mir-106a-5p	MIMAT0000103	ELOC	6921	HITS-CLIP	23824327	Unspecified
hsa-mir-106a-5p	MIMAT0000103	EIF4H	7458	PAR-CLIP	22012620|21572407|20371350	Unspecified
hsa-mir-106a-5p	MIMAT0000103	CSDE1	7812	PAR-CLIP	21572407	Unspecified
hsa-mir-106a-5p	MIMAT0000103	RAB10	10890	PAR-CLIP	21572407|20371350|27292025	Unspecified
hsa-mir-106a-5p	MIMAT0000103	EMC1	23065	PAR-CLIP	22100165	Unspecified
hsa-mir-106a-5p	MIMAT0000103	NIN	51199	PAR-CLIP	23592263|21572407	Unspecified
hsa-mir-106a-5p	MIMAT0000103	RBM41	55285	HITS-CLIP	23313552	Unspecified
hsa-mir-106a-5p	MIMAT0000103	SMOC1	64093	PAR-CLIP	21572407	Unspecified
hsa-mir-106a-5p	MIMAT0000103	C1orf50	79078	HITS-CLIP	23313552	Unspecified
hsa-mir-106a-5p	MIMAT0000103	CLIP4	79745	PAR-CLIP	20371350	Unspecified
hsa-mir-106a-5p	MIMAT0000103	FOXRED2	80020	HITS-CLIP	23313552	Unspecified
hsa-mir-106a-5p	MIMAT0000103	SLC30A7	148867	PAR-CLIP	23592263	Unspecified
hsa-mir-107	MIMAT0000104	G3BP2	9908	PAR-CLIP	23446348|21572407|20371350	Unspecified
hsa-mir-107	MIMAT0000104	RAB10	10890	PAR-CLIP	21572407|26701625	Unspecified
hsa-mir-107	MIMAT0000104	SUN2	25777	PAR-CLIP	21572407|20371350	Unspecified
hsa-mir-107	MIMAT0000104	FAM98A	25940	PAR-CLIP	24398324|23446348|21572407|20371350	Unspecified
hsa-mir-107	MIMAT0000104	GCC1	79571	HITS-CLIP	23824327	Unspecified
hsa-mir-107	MIMAT0000104	ATP13A3	79572	PAR-CLIP	21572407	Unspecified
hsa-mir-107	MIMAT0000104	PLEKHF2	79666	PAR-CLIP	24398324|21572407	Unspecified
hsa-mir-107	MIMAT0000104	SLC30A7	148867	PAR-CLIP	20371350	Unspecified
hsa-mir-192-5p	MIMAT0000222	ATP1B1	481	Luciferase reporter assay	23221637	Unspecified
hsa-mir-192-5p	MIMAT0000222	CENPF	1063	Microarray	19074876	Unspecified
hsa-mir-192-5p	MIMAT0000222	FBN1	2200	Microarray	19074876	Unspecified
hsa-mir-192-5p	MIMAT0000222	ITGB1	3688	Immunofluorescence//Luciferase reporter assay//Microarray//Western blot	19074876|26506238	Unspecified
hsa-mir-192-5p	MIMAT0000222	PRIM1	5557	Microarray	19074876	Unspecified
hsa-mir-192-5p	MIMAT0000222	RAB1A	5861	Microarray	19074876	Unspecified
hsa-mir-192-5p	MIMAT0000222	RAB2A	5862	Microarray	16822819|19074876	Unspecified
hsa-mir-192-5p	MIMAT0000222	NSD2	7468	Microarray	19074876	Unspecified
hsa-mir-192-5p	MIMAT0000222	PABPC4	8761	Microarray	19074876	Unspecified
hsa-mir-192-5p	MIMAT0000222	AKAP9	10142	Microarray	16822819	Unspecified
hsa-mir-192-5p	MIMAT0000222	TUBGCP3	10426	Microarray	19074876	Unspecified
hsa-mir-192-5p	MIMAT0000222	CIT	11113	Microarray	19074876	Unspecified
hsa-mir-192-5p	MIMAT0000222	EMC1	23065	Microarray	19074876	Unspecified
hsa-mir-192-5p	MIMAT0000222	FKBP15	23307	Microarray	19074876	Unspecified
hsa-mir-192-5p	MIMAT0000222	POLA2	23649	Microarray	19074876	Unspecified
hsa-mir-192-5p	MIMAT0000222	TOR1AIP1	26092	Microarray	19074876	Unspecified
hsa-mir-192-5p	MIMAT0000222	NIN	51199	Microarray	19074876	Unspecified
hsa-mir-192-5p	MIMAT0000222	NDFIP2	54602	Microarray	19074876	Unspecified
hsa-mir-192-5p	MIMAT0000222	MIB1	57534	Microarray	19074876	Unspecified
hsa-mir-192-5p	MIMAT0000222	PTBP2	58155	Microarray	19074876	Unspecified
hsa-mir-192-5p	MIMAT0000222	PLEKHF2	79666	Microarray	19074876	Unspecified
hsa-mir-192-5p	MIMAT0000222	CLIP4	79745	Microarray	19074876	Unspecified
hsa-mir-192-5p	MIMAT0000222	ERMP1	79956	Microarray	19074876	Unspecified
hsa-mir-192-5p	MIMAT0000222	NEK9	91754	HITS-CLIP	23824327	Unspecified
hsa-mir-192-5p	MIMAT0000222	DNAJC19	131118	Microarray	19074876	Unspecified
hsa-mir-192-5p	MIMAT0000222	MIPOL1	145282	Microarray	19074876	Unspecified
hsa-mir-192-5p	MIMAT0000222	USP54	159195	Microarray	19074876	Unspecified
hsa-mir-192-5p	MIMAT0000222	ANO6	196527	Microarray	19074876	Unspecified
hsa-mir-192-5p	MIMAT0000222	TRIM59	286827	Microarray	19074876	Unspecified
hsa-mir-196a-5p	MIMAT0000226	BCS1L	617	CLASH	23622248	Unspecified
hsa-mir-196a-5p	MIMAT0000226	HMOX1	3162	Luciferase reporter assay//qRT-PCR//Western blot	20127796	Unspecified
hsa-mir-196a-5p	MIMAT0000226	PSMD8	5714	CLASH	23622248	Unspecified
hsa-mir-196a-5p	MIMAT0000226	RDX	5962	Immunohistochemistry//Luciferase reporter assay//PAR-CLIP//qRT-PCR//Western blot	24933454|23446348|21572407|26701625	Unspecified
hsa-mir-196a-5p	MIMAT0000226	MYCBP2	23077	CLASH	23622248	Unspecified
hsa-mir-196a-5p	MIMAT0000226	SBNO1	55206	CLASH	23622248	Unspecified
hsa-mir-196a-5p	MIMAT0000226	SLC30A6	55676	HITS-CLIP//Sequencing	20371350|23313552	Unspecified
hsa-mir-197-3p	MIMAT0000227	GLA	2717	PAR-CLIP	23446348	Unspecified
hsa-mir-197-3p	MIMAT0000227	GOLGB1	2804	Microarray	16822819	Unspecified
hsa-mir-197-3p	MIMAT0000227	PRIM1	5557	CLASH	23622248	Unspecified
hsa-mir-197-3p	MIMAT0000227	PRKAR2A	5576	Microarray	16822819	Unspecified
hsa-mir-197-3p	MIMAT0000227	EIF4H	7458	CLASH	23622248	Unspecified
hsa-mir-197-3p	MIMAT0000227	G3BP1	10146	CLASH	23622248	Unspecified
hsa-mir-197-3p	MIMAT0000227	SPART	23111	CLASH	23622248	Unspecified
hsa-mir-197-3p	MIMAT0000227	PMPCA	23203	HITS-CLIP	19536157	Unspecified
hsa-mir-197-3p	MIMAT0000227	ZNF318	24149	CLASH	23622248	Unspecified
hsa-mir-197-3p	MIMAT0000227	NGDN	25983	HITS-CLIP	23824327	Unspecified
hsa-mir-197-3p	MIMAT0000227	RBM41	55285	PAR-CLIP	20371350	Unspecified
hsa-mir-197-3p	MIMAT0000227	ZYG11B	79699	HITS-CLIP	23824327	Unspecified
hsa-mir-197-3p	MIMAT0000227	INTS4	92105	CLASH	23622248	Unspecified
hsa-mir-198	MIMAT0000228	MRPS27	23107	PAR-CLIP	23592263	Unspecified
hsa-mir-198	MIMAT0000228	PRRC2B	84726	PAR-CLIP	23592263	Unspecified
hsa-mir-199a-5p	MIMAT0000231	ABCC1	4363	HITS-CLIP	23313552	Unspecified
hsa-mir-199a-5p	MIMAT0000231	POLA2	23649	HITS-CLIP	23824327	Unspecified
hsa-mir-199a-3p	MIMAT0000232	STC2	8614	PAR-CLIP	21572407|20371350	Unspecified
hsa-mir-199a-3p	MIMAT0000232	TMED5	50999	PAR-CLIP	23592263	Unspecified
hsa-mir-199a-3p	MIMAT0000232	SLC30A6	55676	HITS-CLIP	23313552	Unspecified
hsa-mir-199a-3p	MIMAT0000232	NOL10	79954	PAR-CLIP	27292025	Unspecified
hsa-mir-208a-3p	MIMAT0000241	RAB5C	5878	PAR-CLIP	23446348|21572407|20371350	Unspecified
hsa-mir-129-5p	MIMAT0000242	NPTX1	4884	HITS-CLIP	23824327	Unspecified
hsa-mir-129-5p	MIMAT0000242	PVR	5817	HITS-CLIP	27418678	Unspecified
hsa-mir-129-5p	MIMAT0000242	RAB10	10890	HITS-CLIP//PAR-CLIP	21572407|20371350|23824327|27292025	Unspecified
hsa-mir-129-5p	MIMAT0000242	DPY19L1	23333	PAR-CLIP	22100165	Unspecified
hsa-mir-129-5p	MIMAT0000242	POFUT1	23509	HITS-CLIP	23824327	Unspecified
hsa-mir-129-5p	MIMAT0000242	NUP62	23636	HITS-CLIP	27418678	Unspecified
hsa-mir-129-5p	MIMAT0000242	NGDN	25983	HITS-CLIP	23824327	Unspecified
hsa-mir-129-5p	MIMAT0000242	TIMM8B	26521	HITS-CLIP	23824327	Unspecified
hsa-mir-129-5p	MIMAT0000242	SBNO1	55206	HITS-CLIP	23824327	Unspecified
hsa-mir-129-5p	MIMAT0000242	ERGIC1	57222	HITS-CLIP	23824327	Unspecified
hsa-mir-129-5p	MIMAT0000242	C1orf50	79078	HITS-CLIP	23824327	Unspecified
hsa-mir-129-5p	MIMAT0000242	ZYG11B	79699	HITS-CLIP//PAR-CLIP	20371350|23824327	Unspecified
hsa-mir-129-5p	MIMAT0000242	PRRC2B	84726	HITS-CLIP//PAR-CLIP	23824327|26701625	Unspecified
hsa-mir-148a-3p	MIMAT0000243	DNMT1	1786	Flow//Luciferase reporter assay//qRT-PCR//Western blot	20146264|20483747|22167392|24515776|24714841|26872375|27859417	Unspecified
hsa-mir-148a-3p	MIMAT0000243	NPTX1	4884	PAR-CLIP	20371350	Unspecified
hsa-mir-148a-3p	MIMAT0000243	RAB10	10890	Sequencing	20371350	Unspecified
hsa-mir-148a-3p	MIMAT0000243	MYCBP2	23077	CLASH	23622248	Unspecified
hsa-mir-148a-3p	MIMAT0000243	MRPS27	23107	PAR-CLIP	23592263	Unspecified
hsa-mir-148a-3p	MIMAT0000243	POFUT1	23509	Sequencing	20371350	Unspecified
hsa-mir-148a-3p	MIMAT0000243	RAB14	51552	PAR-CLIP	23592263	Unspecified
hsa-mir-148a-3p	MIMAT0000243	TRIM59	286827	Sequencing	20371350	Unspecified
hsa-mir-30c-5p	MIMAT0000244	DNMT1	1786	Luciferase reporter assay//Western blot	28222434	Unspecified
hsa-mir-30c-5p	MIMAT0000244	CSDE1	7812	CLASH	23622248	Unspecified
hsa-mir-30c-5p	MIMAT0000244	CUL2	8453	qRT-PCR	23418453	Unspecified
hsa-mir-30c-5p	MIMAT0000244	ADAM9	8754	HITS-CLIP	23313552	Unspecified
hsa-mir-30c-5p	MIMAT0000244	CEP350	9857	HITS-CLIP	22473208	Unspecified
hsa-mir-30c-5p	MIMAT0000244	RAB10	10890	PAR-CLIP	21572407	Unspecified
hsa-mir-30c-5p	MIMAT0000244	RAB18	22931	CLASH	23622248	Unspecified
hsa-mir-30c-5p	MIMAT0000244	CLCC1	23155	HITS-CLIP	22473208	Unspecified
hsa-mir-30c-5p	MIMAT0000244	LARP1	23367	PAR-CLIP	23592263|24398324|20371350	Unspecified
hsa-mir-30c-5p	MIMAT0000244	SUN2	25777	CLASH	23622248	Unspecified
hsa-mir-30c-5p	MIMAT0000244	FAM8A1	51439	PAR-CLIP	21572407	Unspecified
hsa-mir-30c-5p	MIMAT0000244	RTN4	57142	CLASH	23622248	Unspecified
hsa-mir-30c-5p	MIMAT0000244	MIB1	57534	HITS-CLIP	22473208	Unspecified
hsa-mir-30c-5p	MIMAT0000244	FYCO1	79443	PAR-CLIP	21572407	Unspecified
hsa-mir-30c-5p	MIMAT0000244	RETREG3	162427	CLASH	23622248	Unspecified
hsa-mir-30d-5p	MIMAT0000245	FBN2	2201	CLASH	23622248	Unspecified
hsa-mir-30d-5p	MIMAT0000245	ADAM9	8754	HITS-CLIP	23313552	Unspecified
hsa-mir-30d-5p	MIMAT0000245	CEP350	9857	HITS-CLIP	22473208	Unspecified
hsa-mir-30d-5p	MIMAT0000245	RAB10	10890	PAR-CLIP	21572407	Unspecified
hsa-mir-30d-5p	MIMAT0000245	CLCC1	23155	HITS-CLIP	22473208	Unspecified
hsa-mir-30d-5p	MIMAT0000245	LARP1	23367	PAR-CLIP	23592263|24398324|20371350	Unspecified
hsa-mir-30d-5p	MIMAT0000245	FAM8A1	51439	PAR-CLIP	21572407	Unspecified
hsa-mir-30d-5p	MIMAT0000245	MIB1	57534	HITS-CLIP	22473208	Unspecified
hsa-mir-30d-5p	MIMAT0000245	FYCO1	79443	PAR-CLIP	21572407	Unspecified
hsa-mir-139-5p	MIMAT0000250	TCF12	6938	PAR-CLIP	22100165	Unspecified
hsa-mir-139-5p	MIMAT0000250	PDE4DIP	9659	HITS-CLIP//PAR-CLIP	22012620|23824327|23706177|27418678	Unspecified
hsa-mir-139-5p	MIMAT0000250	FAM162A	26355	Luciferase reporter assay	24333693	Unspecified
hsa-mir-139-5p	MIMAT0000250	HOOK1	51361	PAR-CLIP	22100165	Unspecified
hsa-mir-147a	MIMAT0000251	AP2M1	1173	PAR-CLIP	26701625	Unspecified
hsa-mir-147a	MIMAT0000251	STC2	8614	HITS-CLIP	23824327	Unspecified
hsa-mir-147a	MIMAT0000251	SIGMAR1	10280	PAR-CLIP	20371350	Unspecified
hsa-mir-147a	MIMAT0000251	COLGALT1	79709	PAR-CLIP	23592263	Unspecified
hsa-mir-147a	MIMAT0000251	DCAKD	79877	HITS-CLIP//PAR-CLIP	26701625|27418678	Unspecified
hsa-mir-147a	MIMAT0000251	PRRC2B	84726	PAR-CLIP	23592263	Unspecified
hsa-mir-7-5p	MIMAT0000252	GGCX	2677	PAR-CLIP	21572407	Unspecified
hsa-mir-7-5p	MIMAT0000252	IDE	3416	Microarray	17612493|19073608	Unspecified
hsa-mir-7-5p	MIMAT0000252	ABCC1	4363	Immunohistochemistry//Luciferase reporter assay//Microarray//qRT-PCR//Western blot	20099276|19073608|26108539	Unspecified
hsa-mir-7-5p	MIMAT0000252	RALA	5898	CLASH	23622248	Unspecified
hsa-mir-7-5p	MIMAT0000252	WFS1	7466	Microarray	19073608	Unspecified
hsa-mir-7-5p	MIMAT0000252	GPAA1	8733	Microarray	19073608	Unspecified
hsa-mir-7-5p	MIMAT0000252	RNF41	10193	PAR-CLIP//Sequencing	20371350|23592263	Unspecified
hsa-mir-7-5p	MIMAT0000252	DCAF7	10238	Microarray	19073608	Unspecified
hsa-mir-7-5p	MIMAT0000252	SIGMAR1	10280	Microarray	19073608	Unspecified
hsa-mir-7-5p	MIMAT0000252	BCKDK	10295	Microarray	19073608	Unspecified
hsa-mir-7-5p	MIMAT0000252	FBLN5	10516	PAR-CLIP	23592263	Unspecified
hsa-mir-7-5p	MIMAT0000252	EXOSC2	23404	Microarray//PAR-CLIP	19073608|20371350	Unspecified
hsa-mir-7-5p	MIMAT0000252	TMEM97	27346	Microarray//PAR-CLIP	17612493|19073608|21572407|20371350	Unspecified
hsa-mir-7-5p	MIMAT0000252	NDFIP2	54602	Microarray	19073608	Unspecified
hsa-mir-7-5p	MIMAT0000252	DNAJC11	55735	Sequencing	20371350	Unspecified
hsa-mir-7-5p	MIMAT0000252	MEPCE	56257	Microarray	19073608	Unspecified
hsa-mir-7-5p	MIMAT0000252	CRTC3	64784	Microarray	19073608	Unspecified
hsa-mir-7-5p	MIMAT0000252	FYCO1	79443	PAR-CLIP	21572407	Unspecified
hsa-mir-10a-5p	MIMAT0000253	NPTX1	4884	CLASH	23622248	Unspecified
hsa-mir-10a-5p	MIMAT0000253	SRP19	6728	PAR-CLIP	27292025	Unspecified
hsa-mir-10a-5p	MIMAT0000253	TLE3	7090	Sequencing	20371350	Unspecified
hsa-mir-10a-5p	MIMAT0000253	EIF4H	7458	CLASH	23622248	Unspecified
hsa-mir-10a-5p	MIMAT0000253	BCKDK	10295	CLASH	23622248	Unspecified
hsa-mir-10a-5p	MIMAT0000253	RAB18	22931	CLASH	23622248	Unspecified
hsa-mir-10a-5p	MIMAT0000253	SCAP	22937	CLASH	23622248	Unspecified
hsa-mir-10a-5p	MIMAT0000253	EXOSC2	23404	HITS-CLIP	23313552	Unspecified
hsa-mir-10a-5p	MIMAT0000253	ZNF318	24149	CLASH	23622248	Unspecified
hsa-mir-10a-5p	MIMAT0000253	PABPC1	26986	CLASH	23622248	Unspecified
hsa-mir-10a-5p	MIMAT0000253	TMED5	50999	PAR-CLIP	23592263	Unspecified
hsa-mir-10a-5p	MIMAT0000253	FOXRED2	80020	PAR-CLIP	27292025	Unspecified
hsa-mir-10a-5p	MIMAT0000253	ZC3H18	124245	CLASH	23622248	Unspecified
hsa-mir-10a-5p	MIMAT0000253	ANO6	196527	CLASH	23622248	Unspecified
hsa-mir-10b-5p	MIMAT0000254	NPTX1	4884	CLASH	23622248	Unspecified
hsa-mir-10b-5p	MIMAT0000254	SRP19	6728	PAR-CLIP	27292025	Unspecified
hsa-mir-10b-5p	MIMAT0000254	EXOSC2	23404	HITS-CLIP	23313552	Unspecified
hsa-mir-10b-5p	MIMAT0000254	ZNF318	24149	CLASH	23622248	Unspecified
hsa-mir-10b-5p	MIMAT0000254	PABPC1	26986	CLASH	23622248	Unspecified
hsa-mir-10b-5p	MIMAT0000254	TMED5	50999	PAR-CLIP	23592263	Unspecified
hsa-mir-10b-5p	MIMAT0000254	CHPF2	54480	CLASH	23622248	Unspecified
hsa-mir-10b-5p	MIMAT0000254	FOXRED2	80020	PAR-CLIP	27292025	Unspecified
hsa-mir-10b-5p	MIMAT0000254	ZC3H18	124245	CLASH	23622248	Unspecified
hsa-mir-34a-5p	MIMAT0000255	AP2A2	161	Proteomics	21566225	Unspecified
hsa-mir-34a-5p	MIMAT0000255	ARF6	382	Proteomics	21566225	Unspecified
hsa-mir-34a-5p	MIMAT0000255	AP2M1	1173	Proteomics	21566225	Unspecified
hsa-mir-34a-5p	MIMAT0000255	DDX10	1662	Proteomics	21566225	Unspecified
hsa-mir-34a-5p	MIMAT0000255	IMPDH2	3615	Luciferase reporter assay	22301190	Unspecified
hsa-mir-34a-5p	MIMAT0000255	MOV10	4343	Sequencing	20371350	Unspecified
hsa-mir-34a-5p	MIMAT0000255	NUP98	4928	Proteomics	21566225	Unspecified
hsa-mir-34a-5p	MIMAT0000255	PKP2	5318	Proteomics	21566225	Unspecified
hsa-mir-34a-5p	MIMAT0000255	PRIM1	5557	Proteomics	21566225	Unspecified
hsa-mir-34a-5p	MIMAT0000255	TLE3	7090	CLASH	23622248	Unspecified
hsa-mir-34a-5p	MIMAT0000255	RAE1	8480	Proteomics	21566225	Unspecified
hsa-mir-34a-5p	MIMAT0000255	DDX21	9188	Proteomics	21566225	Unspecified
hsa-mir-34a-5p	MIMAT0000255	G3BP2	9908	Proteomics	21566225	Unspecified
hsa-mir-34a-5p	MIMAT0000255	LARP1	23367	Proteomics	21566225	Unspecified
hsa-mir-34a-5p	MIMAT0000255	NUP62	23636	Sequencing	20371350	Unspecified
hsa-mir-34a-5p	MIMAT0000255	GIGYF2	26058	Proteomics	21566225	Unspecified
hsa-mir-34a-5p	MIMAT0000255	UBAP2	55833	Proteomics	21566225	Unspecified
hsa-mir-34a-5p	MIMAT0000255	RTN4	57142	Proteomics//Sequencing	21566225|20371350	Unspecified
hsa-mir-34a-5p	MIMAT0000255	DCTPP1	79077	Proteomics	21566225	Unspecified
hsa-mir-34a-5p	MIMAT0000255	EDEM3	80267	PAR-CLIP	23592263	Unspecified
hsa-mir-34a-5p	MIMAT0000255	CYB5B	80777	Proteomics	21566225	Unspecified
hsa-mir-34a-5p	MIMAT0000255	PRRC2B	84726	CLASH	23622248	Unspecified
hsa-mir-181a-5p	MIMAT0000256	ARF6	382	Microarray//PAR-CLIP	17612493|21572407	Unspecified
hsa-mir-181a-5p	MIMAT0000256	RALA	5898	Flow//Luciferase reporter assay//Microarray//qRT-PCR//Western blot	22442671|22815788	Unspecified
hsa-mir-181a-5p	MIMAT0000256	NSD2	7468	PAR-CLIP	23592263|21572407	Unspecified
hsa-mir-181a-5p	MIMAT0000256	NUP58	9818	Sequencing	20371350	Unspecified
hsa-mir-181a-5p	MIMAT0000256	G3BP2	9908	HITS-CLIP	22473208	Unspecified
hsa-mir-181a-5p	MIMAT0000256	CLCC1	23155	HITS-CLIP	22473208	Unspecified
hsa-mir-181a-5p	MIMAT0000256	PABPC1	26986	CLASH	23622248	Unspecified
hsa-mir-181a-5p	MIMAT0000256	NIN	51199	HITS-CLIP	22473208	Unspecified
hsa-mir-181a-5p	MIMAT0000256	FKBP7	51661	Microarray	17612493	Unspecified
hsa-mir-181a-5p	MIMAT0000256	FKBP10	60681	Microarray	17612493	Unspecified
hsa-mir-181a-5p	MIMAT0000256	PRRC2B	84726	CLASH	23622248	Unspecified
hsa-mir-181a-5p	MIMAT0000256	ARL6IP6	151188	Microarray	17612493	Unspecified
hsa-mir-181b-5p	MIMAT0000257	ARF6	382	PAR-CLIP	21572407	Unspecified
hsa-mir-181b-5p	MIMAT0000257	NSD2	7468	PAR-CLIP	23592263|21572407	Unspecified
hsa-mir-181b-5p	MIMAT0000257	EIF4E2	9470	CLASH	23622248	Unspecified
hsa-mir-181b-5p	MIMAT0000257	G3BP2	9908	HITS-CLIP	22473208	Unspecified
hsa-mir-181b-5p	MIMAT0000257	SCAP	22937	CLASH	23622248	Unspecified
hsa-mir-181b-5p	MIMAT0000257	CLCC1	23155	HITS-CLIP	22473208	Unspecified
hsa-mir-181b-5p	MIMAT0000257	NIN	51199	HITS-CLIP	22473208	Unspecified
hsa-mir-181b-5p	MIMAT0000257	MEPCE	56257	CLASH	23622248	Unspecified
hsa-mir-181b-5p	MIMAT0000257	ZNF503	84858	CLASH	23622248	Unspecified
hsa-mir-181c-5p	MIMAT0000258	ARF6	382	PAR-CLIP	21572407	Unspecified
hsa-mir-181c-5p	MIMAT0000258	NSD2	7468	PAR-CLIP	23592263|21572407	Unspecified
hsa-mir-181c-5p	MIMAT0000258	G3BP2	9908	HITS-CLIP	22473208	Unspecified
hsa-mir-181c-5p	MIMAT0000258	CLCC1	23155	HITS-CLIP	22473208	Unspecified
hsa-mir-181c-5p	MIMAT0000258	NIN	51199	HITS-CLIP	22473208	Unspecified
hsa-mir-182-5p	MIMAT0000259	LOX	4015	PAR-CLIP	27292025	Unspecified
hsa-mir-182-5p	MIMAT0000259	NPTX1	4884	HITS-CLIP	23824327	Unspecified
hsa-mir-182-5p	MIMAT0000259	EXOSC2	23404	HITS-CLIP	23824327	Unspecified
hsa-mir-182-5p	MIMAT0000259	ATP13A3	79572	CLASH	23622248	Unspecified
hsa-mir-182-5p	MIMAT0000259	ANO6	196527	CLASH	23622248	Unspecified
hsa-mir-183-5p	MIMAT0000261	GNG5	2787	PAR-CLIP	23592263|24398324|21572407|20371350|27292025	Unspecified
hsa-mir-183-5p	MIMAT0000261	ITGB1	3688	Immunoblot//Immunocytochemistry//Luciferase reporter assay//qRT-PCR//Reporter assay	19940135	Unspecified
hsa-mir-183-5p	MIMAT0000261	PLOD2	5352	CLASH	23622248	Unspecified
hsa-mir-183-5p	MIMAT0000261	RNF41	10193	Sequencing	20371350	Unspecified
hsa-mir-183-5p	MIMAT0000261	HYOU1	10525	CLASH	23622248	Unspecified
hsa-mir-183-5p	MIMAT0000261	MYCBP2	23077	CLASH	23622248	Unspecified
hsa-mir-183-5p	MIMAT0000261	ERC1	23085	Sequencing	20371350	Unspecified
hsa-mir-183-5p	MIMAT0000261	LARP1	23367	CLASH	23622248	Unspecified
hsa-mir-183-5p	MIMAT0000261	RTN4	57142	Sequencing	20371350	Unspecified
hsa-mir-183-5p	MIMAT0000261	GCC1	79571	Sequencing	20371350	Unspecified
hsa-mir-183-5p	MIMAT0000261	ZC3H18	124245	CLASH	23622248	Unspecified
hsa-mir-183-5p	MIMAT0000261	MIPOL1	145282	HITS-CLIP	19536157	Unspecified
hsa-mir-187-3p	MIMAT0000262	STOML2	30968	CLASH	23622248	Unspecified
hsa-mir-199b-5p	MIMAT0000263	ABCC1	4363	HITS-CLIP	23313552	Unspecified
hsa-mir-199b-5p	MIMAT0000263	POLA2	23649	HITS-CLIP	23824327	Unspecified
hsa-mir-203a-3p	MIMAT0000264	STOM	2040	PAR-CLIP	22100165	Unspecified
hsa-mir-203a-3p	MIMAT0000264	RNF41	10193	PAR-CLIP	23592263	Unspecified
hsa-mir-203a-3p	MIMAT0000264	CIT	11113	PAR-CLIP	22100165	Unspecified
hsa-mir-203a-3p	MIMAT0000264	HECTD1	25831	PAR-CLIP	23592263	Unspecified
hsa-mir-203a-3p	MIMAT0000264	TMEM97	27346	PAR-CLIP	21572407|20371350	Unspecified
hsa-mir-203a-3p	MIMAT0000264	TBK1	29110	Luciferase reporter assay//qRT-PCR//Western blot	26584294	Unspecified
hsa-mir-203a-3p	MIMAT0000264	FYCO1	79443	PAR-CLIP	21572407	Unspecified
hsa-mir-204-5p	MIMAT0000265	NPTX1	4884	HITS-CLIP	23824327	Unspecified
hsa-mir-204-5p	MIMAT0000265	PLAT	5327	Microarray	21282569	Unspecified
hsa-mir-204-5p	MIMAT0000265	BRD2	6046	CLASH	23622248	Unspecified
hsa-mir-204-5p	MIMAT0000265	TCF12	6938	Immunofluorescence//Luciferase reporter assay//Microarray//qRT-PCR//Western blot	21282569|22523078	Unspecified
hsa-mir-204-5p	MIMAT0000265	CSDE1	7812	CLASH	23622248	Unspecified
hsa-mir-204-5p	MIMAT0000265	STC2	8614	HITS-CLIP	23824327	Unspecified
hsa-mir-204-5p	MIMAT0000265	G3BP2	9908	HITS-CLIP	23824327	Unspecified
hsa-mir-204-5p	MIMAT0000265	DCAF7	10238	HITS-CLIP	23824327	Unspecified
hsa-mir-204-5p	MIMAT0000265	RAB10	10890	PAR-CLIP	21572407|20371350|27292025	Unspecified
hsa-mir-204-5p	MIMAT0000265	SLC27A2	11001	HITS-CLIP	23824327	Unspecified
hsa-mir-204-5p	MIMAT0000265	MRPS27	23107	HITS-CLIP	23824327|19536157	Unspecified
hsa-mir-204-5p	MIMAT0000265	BRD4	23476	HITS-CLIP	23824327	Unspecified
hsa-mir-204-5p	MIMAT0000265	NGDN	25983	HITS-CLIP	23824327	Unspecified
hsa-mir-204-5p	MIMAT0000265	TOR1AIP1	26092	HITS-CLIP	23824327	Unspecified
hsa-mir-204-5p	MIMAT0000265	RAB14	51552	HITS-CLIP	23824327	Unspecified
hsa-mir-204-5p	MIMAT0000265	SMOC1	64093	HITS-CLIP	23824327	Unspecified
hsa-mir-204-5p	MIMAT0000265	ZYG11B	79699	PAR-CLIP	22012620	Unspecified
hsa-mir-205-5p	MIMAT0000266	CENPF	1063	Immunohistochemistry//Luciferase reporter assay//qRT-PCR//Western blot	26059417	Unspecified
hsa-mir-205-5p	MIMAT0000266	SIGMAR1	10280	Luciferase reporter assay	20065103	Unspecified
hsa-mir-205-5p	MIMAT0000266	NEK9	91754	HITS-CLIP	23824327	Unspecified
hsa-mir-210-3p	MIMAT0000267	NPTX1	4884	immunoprecipitaion//Luciferase reporter assay//qRT-PCR	18539147|19826008	Unspecified
hsa-mir-210-3p	MIMAT0000267	HECTD1	25831	immunoprecipitaion//Microarray//qRT-PCR	19826008	Unspecified
hsa-mir-210-3p	MIMAT0000267	MIB1	57534	immunoprecipitaion//Microarray//qRT-PCR	19826008	Unspecified
hsa-mir-211-5p	MIMAT0000268	NPTX1	4884	HITS-CLIP	23824327	Unspecified
hsa-mir-211-5p	MIMAT0000268	TCF12	6938	Immunofluorescence//Microarray//qRT-PCR//Western blot	22523078	Unspecified
hsa-mir-211-5p	MIMAT0000268	STC2	8614	HITS-CLIP	23824327	Unspecified
hsa-mir-211-5p	MIMAT0000268	G3BP2	9908	HITS-CLIP	23824327	Unspecified
hsa-mir-211-5p	MIMAT0000268	DCAF7	10238	HITS-CLIP	23824327	Unspecified
hsa-mir-211-5p	MIMAT0000268	RAB10	10890	PAR-CLIP	21572407|20371350|27292025	Unspecified
hsa-mir-211-5p	MIMAT0000268	SLC27A2	11001	HITS-CLIP	23824327	Unspecified
hsa-mir-211-5p	MIMAT0000268	MRPS27	23107	HITS-CLIP	23824327|19536157	Unspecified
hsa-mir-211-5p	MIMAT0000268	BRD4	23476	HITS-CLIP	23824327	Unspecified
hsa-mir-211-5p	MIMAT0000268	NGDN	25983	HITS-CLIP	23824327	Unspecified
hsa-mir-211-5p	MIMAT0000268	TOR1AIP1	26092	HITS-CLIP	23824327	Unspecified
hsa-mir-211-5p	MIMAT0000268	RAB14	51552	HITS-CLIP	23824327	Unspecified
hsa-mir-211-5p	MIMAT0000268	SMOC1	64093	HITS-CLIP	23824327	Unspecified
hsa-mir-211-5p	MIMAT0000268	ZYG11B	79699	PAR-CLIP	22012620	Unspecified
hsa-mir-212-3p	MIMAT0000269	GNB1	2782	PAR-CLIP	21572407	Unspecified
hsa-mir-212-3p	MIMAT0000269	ELOC	6921	PAR-CLIP	24398324|26701625|27292025	Unspecified
hsa-mir-212-3p	MIMAT0000269	RAB18	22931	PAR-CLIP	22012620	Unspecified
hsa-mir-181a-3p	MIMAT0000270	MARK2	2011	PAR-CLIP	26701625	Unspecified
hsa-mir-214-3p	MIMAT0000271	POR	5447	Luciferase reporter assay	23905773	Unspecified
hsa-mir-214-3p	MIMAT0000271	AP3B1	8546	Microarray	19859982	Unspecified
hsa-mir-214-3p	MIMAT0000271	ERC1	23085	PAR-CLIP	23592263	Unspecified
hsa-mir-215-5p	MIMAT0000272	CENPF	1063	Microarray	19074876	Unspecified
hsa-mir-215-5p	MIMAT0000272	FBN1	2200	Microarray	19074876	Unspecified
hsa-mir-215-5p	MIMAT0000272	ITGB1	3688	Microarray	19074876	Unspecified
hsa-mir-215-5p	MIMAT0000272	PRIM1	5557	Microarray	19074876	Unspecified
hsa-mir-215-5p	MIMAT0000272	RAB1A	5861	Microarray	19074876	Unspecified
hsa-mir-215-5p	MIMAT0000272	RAB2A	5862	Microarray	19074876	Unspecified
hsa-mir-215-5p	MIMAT0000272	NSD2	7468	Microarray	19074876	Unspecified
hsa-mir-215-5p	MIMAT0000272	PABPC4	8761	Microarray	19074876	Unspecified
hsa-mir-215-5p	MIMAT0000272	TUBGCP3	10426	Microarray	19074876	Unspecified
hsa-mir-215-5p	MIMAT0000272	CIT	11113	Microarray	19074876	Unspecified
hsa-mir-215-5p	MIMAT0000272	EMC1	23065	Microarray	19074876	Unspecified
hsa-mir-215-5p	MIMAT0000272	POLA2	23649	Microarray	19074876	Unspecified
hsa-mir-215-5p	MIMAT0000272	TOR1AIP1	26092	Microarray	19074876	Unspecified
hsa-mir-215-5p	MIMAT0000272	MIB1	57534	Microarray	19074876	Unspecified
hsa-mir-215-5p	MIMAT0000272	PTBP2	58155	Microarray	19074876	Unspecified
hsa-mir-215-5p	MIMAT0000272	PLEKHF2	79666	Microarray	19074876	Unspecified
hsa-mir-215-5p	MIMAT0000272	CLIP4	79745	Microarray	19074876	Unspecified
hsa-mir-215-5p	MIMAT0000272	ERMP1	79956	Microarray	19074876	Unspecified
hsa-mir-215-5p	MIMAT0000272	NEK9	91754	HITS-CLIP	23824327	Unspecified
hsa-mir-215-5p	MIMAT0000272	DNAJC19	131118	Microarray	19074876	Unspecified
hsa-mir-215-5p	MIMAT0000272	MIPOL1	145282	Microarray	19074876	Unspecified
hsa-mir-215-5p	MIMAT0000272	USP54	159195	Microarray	19074876	Unspecified
hsa-mir-215-5p	MIMAT0000272	TRIM59	286827	Microarray	19074876	Unspecified
hsa-mir-216a-5p	MIMAT0000273	SLU7	10569	HITS-CLIP	23824327	Unspecified
hsa-mir-216a-5p	MIMAT0000273	SEPSECS	51091	HITS-CLIP	23824327	Unspecified
hsa-mir-216a-5p	MIMAT0000273	TARS2	80222	PAR-CLIP	27292025	Unspecified
hsa-mir-217	MIMAT0000274	DNMT1	1786	Luciferase reporter assay	28380423	Unspecified
hsa-mir-217	MIMAT0000274	GHITM	27069	PAR-CLIP	23446348	Unspecified
hsa-mir-218-5p	MIMAT0000275	AP2A2	161	HITS-CLIP	23212916	Unspecified
hsa-mir-218-5p	MIMAT0000275	RHOA	387	HITS-CLIP	23212916	Unspecified
hsa-mir-218-5p	MIMAT0000275	ATP1B1	481	HITS-CLIP	23212916	Unspecified
hsa-mir-218-5p	MIMAT0000275	ATP6AP1	537	HITS-CLIP	23212916	Unspecified
hsa-mir-218-5p	MIMAT0000275	CYB5R3	1727	HITS-CLIP	23212916	Unspecified
hsa-mir-218-5p	MIMAT0000275	DNMT1	1786	HITS-CLIP	23212916	Unspecified
hsa-mir-218-5p	MIMAT0000275	FBN2	2201	HITS-CLIP	23212916	Unspecified
hsa-mir-218-5p	MIMAT0000275	GNB1	2782	HITS-CLIP	23212916	Unspecified
hsa-mir-218-5p	MIMAT0000275	GOLGA3	2802	HITS-CLIP	23212916	Unspecified
hsa-mir-218-5p	MIMAT0000275	GOLGB1	2804	HITS-CLIP	23212916	Unspecified
hsa-mir-218-5p	MIMAT0000275	HMOX1	3162	Luciferase reporter assay	26876575	Unspecified
hsa-mir-218-5p	MIMAT0000275	IMPDH2	3615	HITS-CLIP	23212916	Unspecified
hsa-mir-218-5p	MIMAT0000275	ITGB1	3688	HITS-CLIP	23212916	Unspecified
hsa-mir-218-5p	MIMAT0000275	REEP5	7905	HITS-CLIP	23212916	Unspecified
hsa-mir-218-5p	MIMAT0000275	NUP214	8021	HITS-CLIP	23212916	Unspecified
hsa-mir-218-5p	MIMAT0000275	PABPC4	8761	HITS-CLIP	23212916	Unspecified
hsa-mir-218-5p	MIMAT0000275	PMPCB	9512	HITS-CLIP	23212916	Unspecified
hsa-mir-218-5p	MIMAT0000275	AKAP8	10270	Sequencing	20371350	Unspecified
hsa-mir-218-5p	MIMAT0000275	PITRM1	10531	HITS-CLIP	23212916	Unspecified
hsa-mir-218-5p	MIMAT0000275	MRPS27	23107	qRT-PCR//Western blot	17998940	Unspecified
hsa-mir-218-5p	MIMAT0000275	LARP4B	23185	HITS-CLIP	23212916	Unspecified
hsa-mir-218-5p	MIMAT0000275	NUP210	23225	HITS-CLIP	23313552	Unspecified
hsa-mir-218-5p	MIMAT0000275	TIMM10B	26515	HITS-CLIP	23212916	Unspecified
hsa-mir-218-5p	MIMAT0000275	GHITM	27069	PAR-CLIP	23446348	Unspecified
hsa-mir-218-5p	MIMAT0000275	MRPS2	51116	HITS-CLIP	23212916	Unspecified
hsa-mir-218-5p	MIMAT0000275	PLEKHA5	54477	HITS-CLIP	23212916	Unspecified
hsa-mir-218-5p	MIMAT0000275	SBNO1	55206	CLASH	23622248	Unspecified
hsa-mir-218-5p	MIMAT0000275	DNAJC11	55735	HITS-CLIP	23212916	Unspecified
hsa-mir-218-5p	MIMAT0000275	UGGT2	55757	HITS-CLIP	23212916	Unspecified
hsa-mir-218-5p	MIMAT0000275	UBAP2	55833	HITS-CLIP	23212916	Unspecified
hsa-mir-218-5p	MIMAT0000275	FKBP10	60681	HITS-CLIP	23212916	Unspecified
hsa-mir-218-5p	MIMAT0000275	THTPA	79178	HITS-CLIP	23212916	Unspecified
hsa-mir-218-5p	MIMAT0000275	FYCO1	79443	HITS-CLIP	23212916	Unspecified
hsa-mir-218-5p	MIMAT0000275	DCAKD	79877	HITS-CLIP	23212916	Unspecified
hsa-mir-218-5p	MIMAT0000275	ERMP1	79956	HITS-CLIP	23212916	Unspecified
hsa-mir-218-5p	MIMAT0000275	EDEM3	80267	HITS-CLIP	23212916	Unspecified
hsa-mir-218-5p	MIMAT0000275	HS6ST2	90161	HITS-CLIP	23212916	Unspecified
hsa-mir-218-5p	MIMAT0000275	ZC3H18	124245	CLASH	23622248	Unspecified
hsa-mir-218-5p	MIMAT0000275	ANO6	196527	HITS-CLIP	23212916	Unspecified
hsa-mir-219a-5p	MIMAT0000276	TOR1AIP1	26092	PAR-CLIP	21572407	Unspecified
hsa-mir-221-3p	MIMAT0000278	RHOA	387	CLASH	23622248	Unspecified
hsa-mir-221-3p	MIMAT0000278	ACSL3	2181	Sequencing	20371350	Unspecified
hsa-mir-221-3p	MIMAT0000278	PLOD2	5352	Sequencing	20371350	Unspecified
hsa-mir-221-3p	MIMAT0000278	RAB1A	5861	Luciferase reporter assay//QRTPCR//Western blot	23770851	Unspecified
hsa-mir-221-3p	MIMAT0000278	RAB5C	5878	CLASH	23622248	Unspecified
hsa-mir-221-3p	MIMAT0000278	AP3B1	8546	CLASH	23622248	Unspecified
hsa-mir-221-3p	MIMAT0000278	ERC1	23085	CLASH	23622248	Unspecified
hsa-mir-221-3p	MIMAT0000278	NUP210	23225	CLASH	23622248	Unspecified
hsa-mir-221-3p	MIMAT0000278	HECTD1	25831	CLASH	23622248	Unspecified
hsa-mir-221-3p	MIMAT0000278	TBK1	29110	Microarray//Reporter assay//Western blot	20018759	Unspecified
hsa-mir-221-3p	MIMAT0000278	SLC30A7	148867	CLASH	23622248	Unspecified
hsa-mir-222-3p	MIMAT0000279	PCNT	5116	CLASH	23622248	Unspecified
hsa-mir-222-3p	MIMAT0000279	PKP2	5318	CLASH	23622248	Unspecified
hsa-mir-222-3p	MIMAT0000279	ELOB	6923	CLASH	23622248	Unspecified
hsa-mir-222-3p	MIMAT0000279	TLE3	7090	CLASH	23622248	Unspecified
hsa-mir-222-3p	MIMAT0000279	DDX21	9188	CLASH	23622248	Unspecified
hsa-mir-222-3p	MIMAT0000279	DCAF7	10238	CLASH	23622248	Unspecified
hsa-mir-222-3p	MIMAT0000279	CEP250	11190	CLASH	23622248	Unspecified
hsa-mir-222-3p	MIMAT0000279	MDN1	23195	CLASH	23622248	Unspecified
hsa-mir-222-3p	MIMAT0000279	SUN2	25777	CLASH	23622248	Unspecified
hsa-mir-223-3p	MIMAT0000280	SCARB1	949	Luciferase reporter assay	23459944	Unspecified
hsa-mir-223-3p	MIMAT0000280	ITGB1	3688	PAR-CLIP	20371350	Unspecified
hsa-mir-223-3p	MIMAT0000280	PTBP2	58155	Luciferase reporter assay//qRT-PCR	23174904	Unspecified
hsa-mir-224-5p	MIMAT0000281	AP2M1	1173	Luciferase reporter assay	20065103	Unspecified
hsa-mir-224-5p	MIMAT0000281	ABCC1	4363	HITS-CLIP	23313552	Unspecified
hsa-mir-224-5p	MIMAT0000281	PIGO	84720	HITS-CLIP	23313552	Unspecified
hsa-mir-200b-3p	MIMAT0000318	RHOA	387	Luciferase reporter assay	26903801	Unspecified
hsa-mir-200b-3p	MIMAT0000318	DNMT1	1786	ChIP-seq//qRT-PCR//Western blot	25595591	Unspecified
hsa-mir-200b-3p	MIMAT0000318	LOX	4015	Luciferase reporter assay//qRT-PCR//Western blot	23975428	Unspecified
hsa-mir-200b-3p	MIMAT0000318	ELOC	6921	PAR-CLIP	24398324|26701625|27292025	Unspecified
hsa-mir-200b-3p	MIMAT0000318	RAB18	22931	Luciferase reporter assay//qRT-PCR//Western blot	24477653	Unspecified
hsa-mir-200b-3p	MIMAT0000318	PABPC1	26986	HITS-CLIP	19536157	Unspecified
hsa-mir-200b-3p	MIMAT0000318	TBK1	29110	PAR-CLIP	24398324	Unspecified
hsa-mir-200b-3p	MIMAT0000318	ERMP1	79956	PAR-CLIP	22012620	Unspecified
hsa-let-7g-5p	MIMAT0000414	GNG5	2787	PAR-CLIP	20371350|27292025	Unspecified
hsa-let-7g-5p	MIMAT0000414	PRIM2	5558	HITS-CLIP	23706177	Unspecified
hsa-let-7g-5p	MIMAT0000414	RDX	5962	PAR-CLIP	23446348|21572407|26701625	Unspecified
hsa-let-7g-5p	MIMAT0000414	CEP135	9662	PAR-CLIP	24398324	Unspecified
hsa-let-7g-5p	MIMAT0000414	AKAP8	10270	PAR-CLIP	21572407|20371350	Unspecified
hsa-let-7g-5p	MIMAT0000414	PMPCA	23203	PAR-CLIP	21572407|20371350	Unspecified
hsa-let-7g-5p	MIMAT0000414	PLD3	23646	PAR-CLIP	26701625	Unspecified
hsa-let-7g-5p	MIMAT0000414	TMED5	50999	HITS-CLIP//PAR-CLIP	23592263|24906430	Unspecified
hsa-let-7g-5p	MIMAT0000414	EDEM3	80267	HITS-CLIP	23313552	Unspecified
hsa-let-7i-5p	MIMAT0000415	GNG5	2787	PAR-CLIP	20371350|27292025	Unspecified
hsa-let-7i-5p	MIMAT0000415	PRIM2	5558	HITS-CLIP	23706177	Unspecified
hsa-let-7i-5p	MIMAT0000415	RDX	5962	PAR-CLIP	23446348|21572407|26701625	Unspecified
hsa-let-7i-5p	MIMAT0000415	CEP135	9662	PAR-CLIP	24398324	Unspecified
hsa-let-7i-5p	MIMAT0000415	AKAP8	10270	PAR-CLIP	21572407|20371350	Unspecified
hsa-let-7i-5p	MIMAT0000415	PMPCA	23203	PAR-CLIP	21572407|20371350	Unspecified
hsa-let-7i-5p	MIMAT0000415	PLD3	23646	PAR-CLIP	26701625	Unspecified
hsa-let-7i-5p	MIMAT0000415	TMED5	50999	HITS-CLIP//PAR-CLIP	23592263|24906430	Unspecified
hsa-let-7i-5p	MIMAT0000415	EDEM3	80267	HITS-CLIP	23313552	Unspecified
hsa-mir-1-3p	MIMAT0000416	ATP6V1A	523	Proteomics	18668040	Unspecified
hsa-mir-1-3p	MIMAT0000416	CENPF	1063	Proteomics	18668040	Unspecified
hsa-mir-1-3p	MIMAT0000416	CSNK2A2	1459	Proteomics	18668040	Unspecified
hsa-mir-1-3p	MIMAT0000416	F2RL1	2150	Microarray	18668037	Unspecified
hsa-mir-1-3p	MIMAT0000416	FBN1	2200	Proteomics	18668040	Unspecified
hsa-mir-1-3p	MIMAT0000416	GNB1	2782	Microarray//Proteomics	18668037	Unspecified
hsa-mir-1-3p	MIMAT0000416	GNG5	2787	Proteomics	18668040	Unspecified
hsa-mir-1-3p	MIMAT0000416	HDAC2	3066	Proteomics	18668040	Unspecified
hsa-mir-1-3p	MIMAT0000416	HMOX1	3162	Proteomics	18668040	Unspecified
hsa-mir-1-3p	MIMAT0000416	MOV10	4343	Microarray//Proteomics//pSILAC	18668040|18668037	Unspecified
hsa-mir-1-3p	MIMAT0000416	ABCC1	4363	Microarray//Proteomics	18668037	Unspecified
hsa-mir-1-3p	MIMAT0000416	RAB5C	5878	PAR-CLIP	23592263|23446348|21572407|20371350|26701625	Unspecified
hsa-mir-1-3p	MIMAT0000416	SRP19	6728	HITS-CLIP	23824327	Unspecified
hsa-mir-1-3p	MIMAT0000416	AP3B1	8546	Proteomics//pSILAC	18668040	Unspecified
hsa-mir-1-3p	MIMAT0000416	GPAA1	8733	Proteomics	18668040	Unspecified
hsa-mir-1-3p	MIMAT0000416	BAG5	9529	Proteomics	18668040	Unspecified
hsa-mir-1-3p	MIMAT0000416	HS2ST1	9653	Microarray	18668037	Unspecified
hsa-mir-1-3p	MIMAT0000416	G3BP2	9908	Proteomics	18668040	Unspecified
hsa-mir-1-3p	MIMAT0000416	G3BP1	10146	Proteomics	18668040	Unspecified
hsa-mir-1-3p	MIMAT0000416	SIGMAR1	10280	Microarray//Proteomics	18668037	Unspecified
hsa-mir-1-3p	MIMAT0000416	MRPS27	23107	PAR-CLIP	23592263	Unspecified
hsa-mir-1-3p	MIMAT0000416	NUP210	23225	Proteomics	18668040	Unspecified
hsa-mir-1-3p	MIMAT0000416	DPY19L1	23333	Proteomics	18668040	Unspecified
hsa-mir-1-3p	MIMAT0000416	EXOSC2	23404	PAR-CLIP	27292025	Unspecified
hsa-mir-1-3p	MIMAT0000416	POLA2	23649	Proteomics//pSILAC	18668040	Unspecified
hsa-mir-1-3p	MIMAT0000416	CHMP2A	27243	Microarray//Proteomics	18668037	Unspecified
hsa-mir-1-3p	MIMAT0000416	GOLGA7	51125	Proteomics//pSILAC	18668040	Unspecified
hsa-mir-1-3p	MIMAT0000416	HOOK1	51361	Microarray	18668037	Unspecified
hsa-mir-1-3p	MIMAT0000416	RBM28	55131	Proteomics	18668040	Unspecified
hsa-mir-1-3p	MIMAT0000416	UGGT2	55757	Proteomics	18668040	Unspecified
hsa-mir-1-3p	MIMAT0000416	NAT14	57106	Proteomics	18668040	Unspecified
hsa-mir-1-3p	MIMAT0000416	PTBP2	58155	Proteomics//pSILAC	18668040	Unspecified
hsa-mir-1-3p	MIMAT0000416	DCTPP1	79077	Proteomics	18668040	Unspecified
hsa-mir-1-3p	MIMAT0000416	DCAKD	79877	Microarray//Proteomics	18668037	Unspecified
hsa-mir-1-3p	MIMAT0000416	PIGS	94005	Proteomics	18668040	Unspecified
hsa-mir-15b-5p	MIMAT0000417	AP2M1	1173	CLASH	23622248	Unspecified
hsa-mir-15b-5p	MIMAT0000417	GNB1	2782	HITS-CLIP//PAR-CLIP	22473208|23592263|21572407|20371350	Unspecified
hsa-mir-15b-5p	MIMAT0000417	PPT1	5538	CLASH	23622248	Unspecified
hsa-mir-15b-5p	MIMAT0000417	PRKAR2A	5576	PAR-CLIP	23592263|23446348|21572407|20371350	Unspecified
hsa-mir-15b-5p	MIMAT0000417	RAB1A	5861	Luciferase reporter assay//qRT-PCR//Western blot	26023735	Unspecified
hsa-mir-15b-5p	MIMAT0000417	CSDE1	7812	HITS-CLIP	22473208	Unspecified
hsa-mir-15b-5p	MIMAT0000417	NUP214	8021	CLASH	23622248	Unspecified
hsa-mir-15b-5p	MIMAT0000417	CUL2	8453	HITS-CLIP	22473208	Unspecified
hsa-mir-15b-5p	MIMAT0000417	RAE1	8480	CLASH	23622248	Unspecified
hsa-mir-15b-5p	MIMAT0000417	HYOU1	10525	HITS-CLIP	22473208	Unspecified
hsa-mir-15b-5p	MIMAT0000417	MYCBP2	23077	CLASH	23622248	Unspecified
hsa-mir-15b-5p	MIMAT0000417	NUP210	23225	CLASH	23622248	Unspecified
hsa-mir-15b-5p	MIMAT0000417	RPL36	25873	HITS-CLIP	22473208	Unspecified
hsa-mir-15b-5p	MIMAT0000417	SCCPDH	51097	CLASH	23622248	Unspecified
hsa-mir-15b-5p	MIMAT0000417	SBNO1	55206	PAR-CLIP	23446348|21572407|20371350	Unspecified
hsa-mir-15b-5p	MIMAT0000417	RTN4	57142	PAR-CLIP	21572407	Unspecified
hsa-mir-15b-5p	MIMAT0000417	MIB1	57534	HITS-CLIP	22473208	Unspecified
hsa-mir-15b-5p	MIMAT0000417	ATP13A3	79572	HITS-CLIP	22473208	Unspecified
hsa-mir-15b-5p	MIMAT0000417	CHPF	79586	CLASH	23622248	Unspecified
hsa-mir-15b-5p	MIMAT0000417	CLIP4	79745	PAR-CLIP	21572407|20371350	Unspecified
hsa-mir-23b-3p	MIMAT0000418	BCS1L	617	CLASH	23622248	Unspecified
hsa-mir-23b-3p	MIMAT0000418	FBN2	2201	HITS-CLIP	23824327	Unspecified
hsa-mir-23b-3p	MIMAT0000418	IMPDH2	3615	CLASH	23622248	Unspecified
hsa-mir-23b-3p	MIMAT0000418	ABCC1	4363	CLASH	23622248	Unspecified
hsa-mir-23b-3p	MIMAT0000418	CSDE1	7812	CLASH	23622248	Unspecified
hsa-mir-23b-3p	MIMAT0000418	HS2ST1	9653	HITS-CLIP//PAR-CLIP	23446348|21572407|20371350	Unspecified
hsa-mir-23b-3p	MIMAT0000418	G3BP2	9908	Luciferase reporter assay//qRT-PCR//Western blot	26839366	Unspecified
hsa-mir-23b-3p	MIMAT0000418	G3BP1	10146	Sequencing	20371350	Unspecified
hsa-mir-23b-3p	MIMAT0000418	LMAN2	10960	PAR-CLIP	20371350	Unspecified
hsa-mir-23b-3p	MIMAT0000418	EMC1	23065	CLASH	23622248	Unspecified
hsa-mir-23b-3p	MIMAT0000418	TOR1AIP1	26092	PAR-CLIP	22012620	Unspecified
hsa-mir-23b-3p	MIMAT0000418	GHITM	27069	CLASH	23622248	Unspecified
hsa-mir-23b-3p	MIMAT0000418	TRIM59	286827	PAR-CLIP	21572407	Unspecified
hsa-mir-27b-3p	MIMAT0000419	DCAF7	10238	PAR-CLIP	23592263|21572407|20371350	Unspecified
hsa-mir-27b-3p	MIMAT0000419	ERC1	23085	PAR-CLIP	23592263	Unspecified
hsa-mir-27b-3p	MIMAT0000419	MRPS27	23107	PAR-CLIP	23592263	Unspecified
hsa-mir-27b-3p	MIMAT0000419	TIMM10	26519	HITS-CLIP	23824327	Unspecified
hsa-mir-27b-3p	MIMAT0000419	TMED5	50999	HITS-CLIP//PAR-CLIP	22473208|23592263|24398324|24906430	Unspecified
hsa-mir-27b-3p	MIMAT0000419	RAB14	51552	PAR-CLIP	23592263|24398324	Unspecified
hsa-mir-27b-3p	MIMAT0000419	PIGO	84720	HITS-CLIP//PAR-CLIP	23592263|24398324|23446348|21572407|20371350|23824327|27292025	Unspecified
hsa-mir-30b-5p	MIMAT0000420	DNMT1	1786	CLASH//qRT-PCR//Western blot	23622248|24913034	Unspecified
hsa-mir-30b-5p	MIMAT0000420	IMPDH2	3615	CLASH	23622248	Unspecified
hsa-mir-30b-5p	MIMAT0000420	PCNT	5116	CLASH	23622248	Unspecified
hsa-mir-30b-5p	MIMAT0000420	ADAM9	8754	HITS-CLIP	23313552	Unspecified
hsa-mir-30b-5p	MIMAT0000420	CEP350	9857	HITS-CLIP	22473208	Unspecified
hsa-mir-30b-5p	MIMAT0000420	G3BP1	10146	CLASH	23622248	Unspecified
hsa-mir-30b-5p	MIMAT0000420	RAB10	10890	PAR-CLIP	21572407	Unspecified
hsa-mir-30b-5p	MIMAT0000420	RAB18	22931	CLASH	23622248	Unspecified
hsa-mir-30b-5p	MIMAT0000420	CLCC1	23155	HITS-CLIP	22473208	Unspecified
hsa-mir-30b-5p	MIMAT0000420	LARP1	23367	PAR-CLIP	23592263|24398324|20371350	Unspecified
hsa-mir-30b-5p	MIMAT0000420	TMED5	50999	CLASH	23622248	Unspecified
hsa-mir-30b-5p	MIMAT0000420	FAM8A1	51439	PAR-CLIP//Sequencing	20371350|21572407	Unspecified
hsa-mir-30b-5p	MIMAT0000420	MIB1	57534	HITS-CLIP	22473208	Unspecified
hsa-mir-30b-5p	MIMAT0000420	FYCO1	79443	PAR-CLIP	21572407	Unspecified
hsa-mir-30b-5p	MIMAT0000420	CYB5B	80777	CLASH	23622248	Unspecified
hsa-mir-30b-5p	MIMAT0000420	RETREG3	162427	CLASH	23622248	Unspecified
hsa-mir-30b-5p	MIMAT0000420	TRIM59	286827	CLASH	23622248	Unspecified
hsa-mir-122-5p	MIMAT0000421	RHOA	387	Luciferase reporter assay	19617899|19935707	Unspecified
hsa-mir-122-5p	MIMAT0000421	CENPF	1063	Proteomics	21750653	Unspecified
hsa-mir-122-5p	MIMAT0000421	F2RL1	2150	HITS-CLIP	23824327	Unspecified
hsa-mir-122-5p	MIMAT0000421	HMOX1	3162	Microarray//qRT-PCR//Western blot	20633528|17612493	Unspecified
hsa-mir-122-5p	MIMAT0000421	TOMM70	9868	PAR-CLIP	23446348|22012620|20371350	Unspecified
hsa-mir-122-5p	MIMAT0000421	DCAF7	10238	HITS-CLIP	23824327	Unspecified
hsa-mir-122-5p	MIMAT0000421	RAB10	10890	HITS-CLIP	23824327	Unspecified
hsa-mir-122-5p	MIMAT0000421	ERC1	23085	PAR-CLIP	21572407	Unspecified
hsa-mir-122-5p	MIMAT0000421	POFUT1	23509	Microarray	17612493	Unspecified
hsa-mir-122-5p	MIMAT0000421	SBNO1	55206	HITS-CLIP	23824327	Unspecified
hsa-mir-122-5p	MIMAT0000421	UBAP2	55833	Luciferase reporter assay//qRT-PCR	19296470	Unspecified
hsa-mir-122-5p	MIMAT0000421	MRPS25	64432	HITS-CLIP	23313552	Unspecified
hsa-mir-122-5p	MIMAT0000421	ATP13A3	79572	Microarray	17612493	Unspecified
hsa-mir-122-5p	MIMAT0000421	ZYG11B	79699	HITS-CLIP//PAR-CLIP	23824327|27292025	Unspecified
hsa-mir-122-5p	MIMAT0000421	NOL10	79954	PAR-CLIP	27292025	Unspecified
hsa-mir-122-5p	MIMAT0000421	PIGO	84720	HITS-CLIP//PAR-CLIP	23592263|24398324|23446348|21572407|20371350|23824327|27292025	Unspecified
hsa-mir-122-5p	MIMAT0000421	TIMM29	90580	HITS-CLIP//PAR-CLIP	22012620|21572407	Unspecified
hsa-mir-124-3p	MIMAT0000422	RHOA	387	Microarray	18668037	Unspecified
hsa-mir-124-3p	MIMAT0000422	STOM	2040	Microarray//Proteomics	15685193|18668037	Unspecified
hsa-mir-124-3p	MIMAT0000422	HMOX1	3162	Microarray	18668037	Unspecified
hsa-mir-124-3p	MIMAT0000422	ITGB1	3688	Immunoblot//Immunohistochemistry//Luciferase reporter assay//Microarray//qRT-PCR//Western blot	15685193|21196113|21112327|22085528|18668037	Unspecified
hsa-mir-124-3p	MIMAT0000422	RAB8A	4218	Microarray	18668037	Unspecified
hsa-mir-124-3p	MIMAT0000422	MOV10	4343	Microarray	18668037	Unspecified
hsa-mir-124-3p	MIMAT0000422	POLA1	5422	Microarray	18668037	Unspecified
hsa-mir-124-3p	MIMAT0000422	RAB2A	5862	Microarray	18668037	Unspecified
hsa-mir-124-3p	MIMAT0000422	MOGS	7841	Microarray//Proteomics	18668037	Unspecified
hsa-mir-124-3p	MIMAT0000422	STC2	8614	Microarray	18668037	Unspecified
hsa-mir-124-3p	MIMAT0000422	PABPC4	8761	Microarray//Proteomics	18668037	Unspecified
hsa-mir-124-3p	MIMAT0000422	ADAMTS1	9510	Microarray	18668037	Unspecified
hsa-mir-124-3p	MIMAT0000422	BAG5	9529	Microarray	18668037	Unspecified
hsa-mir-124-3p	MIMAT0000422	HS2ST1	9653	Microarray	18668037	Unspecified
hsa-mir-124-3p	MIMAT0000422	G3BP2	9908	Microarray//Proteomics	18668037	Unspecified
hsa-mir-124-3p	MIMAT0000422	G3BP1	10146	Microarray//PAR-CLIP//Proteomics	15685193|18668037|22012620	Unspecified
hsa-mir-124-3p	MIMAT0000422	RNF41	10193	PAR-CLIP	23592263	Unspecified
hsa-mir-124-3p	MIMAT0000422	MPHOSPH10	10199	Microarray//Proteomics	18668037	Unspecified
hsa-mir-124-3p	MIMAT0000422	SLU7	10569	Microarray//Proteomics	18668037	Unspecified
hsa-mir-124-3p	MIMAT0000422	LARP1	23367	Microarray//Proteomics	18668037	Unspecified
hsa-mir-124-3p	MIMAT0000422	POFUT1	23509	Microarray	18668037	Unspecified
hsa-mir-124-3p	MIMAT0000422	MTCH1	23787	Microarray	18668037	Unspecified
hsa-mir-124-3p	MIMAT0000422	NGDN	25983	Microarray//Proteomics	18668037	Unspecified
hsa-mir-124-3p	MIMAT0000422	TIMM8B	26521	Microarray//Proteomics	18668037	Unspecified
hsa-mir-124-3p	MIMAT0000422	AATF	26574	Microarray//Proteomics	18668037	Unspecified
hsa-mir-124-3p	MIMAT0000422	TMED5	50999	PAR-CLIP	20371350	Unspecified
hsa-mir-124-3p	MIMAT0000422	GOLGA7	51125	Microarray//Proteomics	18668037	Unspecified
hsa-mir-124-3p	MIMAT0000422	DPH5	51611	Microarray	18668037	Unspecified
hsa-mir-124-3p	MIMAT0000422	RBM28	55131	Microarray//Proteomics	18668037	Unspecified
hsa-mir-124-3p	MIMAT0000422	SLC44A2	57153	Microarray	18668037	Unspecified
hsa-mir-124-3p	MIMAT0000422	CRTC3	64784	Microarray	18668037	Unspecified
hsa-mir-124-3p	MIMAT0000422	CCDC86	79080	Microarray//Proteomics	18668037	Unspecified
hsa-mir-124-3p	MIMAT0000422	PLEKHF2	79666	Microarray	18668037	Unspecified
hsa-mir-124-3p	MIMAT0000422	NLRX1	79671	Microarray	18668037	Unspecified
hsa-mir-124-3p	MIMAT0000422	COLGALT1	79709	Microarray//Proteomics	18668037	Unspecified
hsa-mir-124-3p	MIMAT0000422	NOL10	79954	Microarray//Proteomics	18668037	Unspecified
hsa-mir-124-3p	MIMAT0000422	FOXRED2	80020	Microarray//Proteomics	18668037	Unspecified
hsa-mir-124-3p	MIMAT0000422	NEK9	91754	HITS-CLIP//Microarray	18668037|15685193|23824327	Unspecified
hsa-mir-124-3p	MIMAT0000422	SLC30A7	148867	Microarray	15685193	Unspecified
hsa-mir-124-3p	MIMAT0000422	ANO6	196527	Microarray	18668037	Unspecified
hsa-mir-125b-5p	MIMAT0000423	FBN1	2200	CLASH	23622248	Unspecified
hsa-mir-125b-5p	MIMAT0000423	ABCC1	4363	CLASH	23622248	Unspecified
hsa-mir-125b-5p	MIMAT0000423	NEU1	4758	Immunohistochemistry//Luciferase reporter assay//qRT-PCR//Western blot	27220320	Unspecified
hsa-mir-125b-5p	MIMAT0000423	STC2	8614	CLASH	23622248	Unspecified
hsa-mir-125b-5p	MIMAT0000423	PABPC4	8761	CLASH	23622248	Unspecified
hsa-mir-125b-5p	MIMAT0000423	UBAP2L	9898	CLASH	23622248	Unspecified
hsa-mir-125b-5p	MIMAT0000423	BCKDK	10295	CLASH	23622248	Unspecified
hsa-mir-125b-5p	MIMAT0000423	EMC1	23065	CLASH	23622248	Unspecified
hsa-mir-125b-5p	MIMAT0000423	ZDHHC5	25921	CLASH	23622248	Unspecified
hsa-mir-125b-5p	MIMAT0000423	TIMM10	26519	CLASH	23622248	Unspecified
hsa-mir-125b-5p	MIMAT0000423	PABPC1	26986	Microarray	17891175	Unspecified
hsa-mir-125b-5p	MIMAT0000423	PDZD11	51248	CLASH	23622248	Unspecified
hsa-mir-125b-5p	MIMAT0000423	CHPF2	54480	CLASH	23622248	Unspecified
hsa-mir-125b-5p	MIMAT0000423	MEPCE	56257	CLASH	23622248	Unspecified
hsa-mir-125b-5p	MIMAT0000423	QSOX2	169714	Microarray	17891175	Unspecified
hsa-mir-128-3p	MIMAT0000424	ACADM	34	Microarray	17612493	Unspecified
hsa-mir-128-3p	MIMAT0000424	ARF6	382	Microarray	17612493	Unspecified
hsa-mir-128-3p	MIMAT0000424	HMOX1	3162	Microarray//PAR-CLIP	17612493|23592263	Unspecified
hsa-mir-128-3p	MIMAT0000424	GDF15	9518	PAR-CLIP	26701625	Unspecified
hsa-mir-128-3p	MIMAT0000424	GCC2	9648	Microarray	17612493	Unspecified
hsa-mir-128-3p	MIMAT0000424	DCAF7	10238	PAR-CLIP	23592263|21572407|20371350	Unspecified
hsa-mir-128-3p	MIMAT0000424	FBLN5	10516	PAR-CLIP	23592263	Unspecified
hsa-mir-128-3p	MIMAT0000424	MRPS27	23107	PAR-CLIP	23592263	Unspecified
hsa-mir-128-3p	MIMAT0000424	LARP1	23367	CLASH	23622248	Unspecified
hsa-mir-128-3p	MIMAT0000424	TIMM10	26519	HITS-CLIP	23824327	Unspecified
hsa-mir-128-3p	MIMAT0000424	TMED5	50999	HITS-CLIP//PAR-CLIP	23592263|24398324|24906430	Unspecified
hsa-mir-128-3p	MIMAT0000424	FKBP10	60681	Microarray	17612493	Unspecified
hsa-mir-128-3p	MIMAT0000424	ZYG11B	79699	HITS-CLIP	23824327	Unspecified
hsa-mir-130a-3p	MIMAT0000425	F2RL1	2150	HITS-CLIP	23824327	Unspecified
hsa-mir-130a-3p	MIMAT0000425	NPTX1	4884	PAR-CLIP	20371350	Unspecified
hsa-mir-130a-3p	MIMAT0000425	USP13	8975	PAR-CLIP	21572407	Unspecified
hsa-mir-130a-3p	MIMAT0000425	SPART	23111	PAR-CLIP	23446348|21572407|20371350	Unspecified
hsa-mir-130a-3p	MIMAT0000425	SUN2	25777	PAR-CLIP	21572407|20371350	Unspecified
hsa-mir-130a-3p	MIMAT0000425	PDZD11	51248	PAR-CLIP	23592263|21572407	Unspecified
hsa-mir-130a-3p	MIMAT0000425	RAB14	51552	PAR-CLIP	23592263	Unspecified
hsa-mir-130a-3p	MIMAT0000425	SMOC1	64093	PAR-CLIP	21572407	Unspecified
hsa-mir-130a-3p	MIMAT0000425	PLEKHF2	79666	PAR-CLIP	24398324|21572407	Unspecified
hsa-mir-132-3p	MIMAT0000426	ARF6	382	Microarray	17612493	Unspecified
hsa-mir-132-3p	MIMAT0000426	GNB1	2782	PAR-CLIP	21572407	Unspecified
hsa-mir-132-3p	MIMAT0000426	SDF2	6388	Microarray	17612493	Unspecified
hsa-mir-132-3p	MIMAT0000426	ELOC	6921	PAR-CLIP	24398324|26701625|27292025	Unspecified
hsa-mir-132-3p	MIMAT0000426	RAB18	22931	PAR-CLIP	22012620	Unspecified
hsa-mir-132-3p	MIMAT0000426	RTN4	57142	Microarray	17612493	Unspecified
hsa-mir-132-3p	MIMAT0000426	FKBP10	60681	Microarray	17612493	Unspecified
hsa-mir-132-3p	MIMAT0000426	ARL6IP6	151188	Microarray	17612493	Unspecified
hsa-mir-133a-3p	MIMAT0000427	FBN1	2200	Microarray	21396852	Unspecified
hsa-mir-133a-3p	MIMAT0000427	RAB5C	5878	PAR-CLIP	27292025	Unspecified
hsa-mir-133a-3p	MIMAT0000427	ATP13A3	79572	PAR-CLIP	21572407	Unspecified
hsa-mir-133a-3p	MIMAT0000427	DCAKD	79877	PAR-CLIP	22012620	Unspecified
hsa-mir-135a-5p	MIMAT0000428	CEP135	9662	HITS-CLIP	23313552	Unspecified
hsa-mir-135a-5p	MIMAT0000428	IL17RA	23765	PAR-CLIP	22100165	Unspecified
hsa-mir-137	MIMAT0000429	GOLGA3	2802	PAR-CLIP	22012620|21572407	Unspecified
hsa-mir-137	MIMAT0000429	PTGES2	80142	PAR-CLIP	23592263	Unspecified
hsa-mir-140-5p	MIMAT0000431	DNMT1	1786	Immunohistochemistry//Luciferase reporter assay//Microarray//qRT-PCR//Western blot	22898998|27021683	Unspecified
hsa-mir-140-5p	MIMAT0000431	RALA	5898	Luciferase reporter assay//Microarray//qRT-PCR	24063364|22815788|26175215	Unspecified
hsa-mir-140-5p	MIMAT0000431	ADAM9	8754	qRT-PCR	27498787	Unspecified
hsa-mir-140-5p	MIMAT0000431	RAB10	10890	PAR-CLIP	21572407|20371350	Unspecified
hsa-mir-140-5p	MIMAT0000431	LARP1	23367	PAR-CLIP	26701625	Unspecified
hsa-mir-141-3p	MIMAT0000432	DPY19L1	23333	PAR-CLIP	22100165	Unspecified
hsa-mir-141-3p	MIMAT0000432	RBM28	55131	HITS-CLIP	23313552	Unspecified
hsa-mir-142-5p	MIMAT0000433	PVR	5817	PAR-CLIP	21572407|20371350	Unspecified
hsa-mir-142-5p	MIMAT0000433	DDX21	9188	PAR-CLIP	20371350	Unspecified
hsa-mir-142-5p	MIMAT0000433	RAB10	10890	PAR-CLIP	21572407	Unspecified
hsa-mir-142-5p	MIMAT0000433	SMOC1	64093	HITS-CLIP	23824327	Unspecified
hsa-mir-142-5p	MIMAT0000433	ATP13A3	79572	PAR-CLIP	20371350	Unspecified
hsa-mir-142-5p	MIMAT0000433	SLC30A7	148867	PAR-CLIP	20371350	Unspecified
hsa-mir-142-5p	MIMAT0000433	TRIM59	286827	PAR-CLIP	22100165|22291592	Unspecified
hsa-mir-142-3p	MIMAT0000434	HSBP1	3281	PAR-CLIP	22100165	Unspecified
hsa-mir-142-3p	MIMAT0000434	LOX	4015	PAR-CLIP	22100165	Unspecified
hsa-mir-142-3p	MIMAT0000434	RAB2A	5862	HITS-CLIP//Microarray//qRT-PCR	22473208|22815788	Unspecified
hsa-mir-142-3p	MIMAT0000434	NSD2	7468	PAR-CLIP	23592263|21572407	Unspecified
hsa-mir-142-3p	MIMAT0000434	MTCH1	23787	PAR-CLIP	23592263	Unspecified
hsa-mir-142-3p	MIMAT0000434	HECTD1	25831	HITS-CLIP//Microarray//PAR-CLIP//qRT-PCR	22473208|23592263|22815788	Unspecified
hsa-mir-142-3p	MIMAT0000434	FAM98A	25940	Microarray	17612493	Unspecified
hsa-mir-142-3p	MIMAT0000434	SLC30A6	55676	HITS-CLIP	23313552	Unspecified
hsa-mir-142-3p	MIMAT0000434	FYCO1	79443	HITS-CLIP	22473208	Unspecified
hsa-mir-142-3p	MIMAT0000434	EDEM3	80267	Microarray	17612493	Unspecified
hsa-mir-142-3p	MIMAT0000434	ARL6IP6	151188	Microarray	17612493	Unspecified
hsa-mir-143-3p	MIMAT0000435	ITGB1	3688	qRT-PCR//Western blot	26722463	Unspecified
hsa-mir-143-3p	MIMAT0000435	BRD2	6046	PAR-CLIP	26701625	Unspecified
hsa-mir-143-3p	MIMAT0000435	SLC30A9	10463	PAR-CLIP	20371350	Unspecified
hsa-mir-143-3p	MIMAT0000435	C1orf50	79078	HITS-CLIP	23824327	Unspecified
hsa-mir-143-3p	MIMAT0000435	PRRC2B	84726	PAR-CLIP	23592263	Unspecified
hsa-mir-144-3p	MIMAT0000436	TMED5	50999	HITS-CLIP//PAR-CLIP	23592263|24906430	Unspecified
hsa-mir-144-3p	MIMAT0000436	GOLGA7	51125	PAR-CLIP	21572407	Unspecified
hsa-mir-145-5p	MIMAT0000437	ARF6	382	In situ hybridization//Luciferase reporter assay//PAR-CLIP//qRT-PCR//Western blot	22291592|25253741	Unspecified
hsa-mir-145-5p	MIMAT0000437	HDAC2	3066	Luciferase reporter assay	23499894	Unspecified
hsa-mir-145-5p	MIMAT0000437	ABCC1	4363	HITS-CLIP//Luciferase reporter assay	23313552|25354783	Unspecified
hsa-mir-145-5p	MIMAT0000437	AGPS	8540	HITS-CLIP//PAR-CLIP	23446348|23313552	Unspecified
hsa-mir-152-3p	MIMAT0000438	DNMT1	1786	Immunoblot//Immunoprecipitaion//Luciferase reporter assay//Microarray//qRT-PCR//Reporter assay//Western blot	20146264|20841484|20578129|23125218|23318422	Unspecified
hsa-mir-152-3p	MIMAT0000438	NPTX1	4884	PAR-CLIP	20371350	Unspecified
hsa-mir-152-3p	MIMAT0000438	MRPS27	23107	PAR-CLIP	23592263	Unspecified
hsa-mir-152-3p	MIMAT0000438	RAB14	51552	PAR-CLIP	23592263	Unspecified
hsa-mir-152-3p	MIMAT0000438	HS6ST2	90161	CLASH	23622248	Unspecified
hsa-mir-153-3p	MIMAT0000439	REEP5	7905	HITS-CLIP	27418678	Unspecified
hsa-mir-153-3p	MIMAT0000439	CEP350	9857	PAR-CLIP	21572407	Unspecified
hsa-mir-191-5p	MIMAT0000440	TLE1	7088	Sequencing	20371350	Unspecified
hsa-mir-191-5p	MIMAT0000440	BZW2	28969	CLASH	23622248	Unspecified
hsa-mir-191-5p	MIMAT0000440	GOLGA7	51125	CLASH	23622248	Unspecified
hsa-mir-9-5p	MIMAT0000441	FBN2	2201	Microarray	17612493	Unspecified
hsa-mir-9-5p	MIMAT0000441	LOX	4015	PAR-CLIP	27292025	Unspecified
hsa-mir-9-5p	MIMAT0000441	ABCC1	4363	Luciferase reporter assay//Microarray//qRT-PCR//Western blot	17612493|28098912	Unspecified
hsa-mir-9-5p	MIMAT0000441	AP3B1	8546	Luciferase reporter assay//Microarray//qRT-PCR//Western blot	22761433	Unspecified
hsa-mir-9-5p	MIMAT0000441	EMC1	23065	HITS-CLIP	23824327|19536157	Unspecified
hsa-mir-9-5p	MIMAT0000441	NIN	51199	Microarray	17612493	Unspecified
hsa-mir-9-5p	MIMAT0000441	EDEM3	80267	HITS-CLIP	23313552	Unspecified
hsa-mir-9-3p	MIMAT0000442	ITGB1	3688	Luciferase reporter assay//Microarray//qRT-PCR	23530058|28418879	Unspecified
hsa-mir-9-3p	MIMAT0000442	GCC2	9648	PAR-CLIP	24398324|21572407|20371350	Unspecified
hsa-mir-9-3p	MIMAT0000442	RNF41	10193	PAR-CLIP	22100165	Unspecified
hsa-mir-125a-5p	MIMAT0000443	ELOB	6923	Sequencing	20371350	Unspecified
hsa-mir-125a-5p	MIMAT0000443	ADAM9	8754	qRT-PCR	24675842	Unspecified
hsa-mir-125a-5p	MIMAT0000443	NIN	51199	CLASH	23622248	Unspecified
hsa-mir-125a-5p	MIMAT0000443	ERMP1	79956	Sequencing	20371350	Unspecified
hsa-mir-126-5p	MIMAT0000444	NPTX1	4884	PAR-CLIP	20371350	Unspecified
hsa-mir-126-5p	MIMAT0000444	ADAM9	8754	Luciferase reporter assay	23437250	Unspecified
hsa-mir-126-5p	MIMAT0000444	MYCBP2	23077	HITS-CLIP	19536157	Unspecified
hsa-mir-126-5p	MIMAT0000444	POFUT1	23509	PAR-CLIP	23592263	Unspecified
hsa-mir-126-3p	MIMAT0000445	DNMT1	1786	Flow//Luciferase reporter assay//Microarray//qRT-PCR//Western blot	21538319	Unspecified
hsa-mir-126-3p	MIMAT0000445	ADAM9	8754	Immunohistochemistry//In situ hybridization//Luciferase reporter assay//Microarray//qRT-PCR//Western blot	23437250|22064652|24823697|25512445|26244545|28260063	Unspecified
hsa-mir-127-3p	MIMAT0000446	BAG5	9529	Luciferase reporter assay//qRT-PCR	27571744	Unspecified
hsa-mir-134-5p	MIMAT0000447	ITGB1	3688	Luciferase reporter assay//Microarray//qRT-PCR	24498348	Unspecified
hsa-mir-134-5p	MIMAT0000447	ABCC1	4363	Northern blot//qRT-PCR//Western blot	20371173	Unspecified
hsa-mir-134-5p	MIMAT0000447	USP13	8975	PAR-CLIP	21572407	Unspecified
hsa-mir-134-5p	MIMAT0000447	POLA2	23649	HITS-CLIP	23824327	Unspecified
hsa-mir-134-5p	MIMAT0000447	ERGIC1	57222	PAR-CLIP	27292025	Unspecified
hsa-mir-134-5p	MIMAT0000447	SMOC1	64093	HITS-CLIP	23824327|19536157|28735896	Unspecified
hsa-mir-136-5p	MIMAT0000448	PLOD2	5352	HITS-CLIP	24374217	Unspecified
hsa-mir-136-5p	MIMAT0000448	REEP5	7905	HITS-CLIP	27418678	Unspecified
hsa-mir-136-5p	MIMAT0000448	G3BP2	9908	HITS-CLIP	24374217	Unspecified
hsa-mir-136-5p	MIMAT0000448	EXOSC2	23404	PAR-CLIP	20371350	Unspecified
hsa-mir-146a-5p	MIMAT0000449	RHOA	387	Luciferase reporter assay	27175941	Unspecified
hsa-mir-146a-5p	MIMAT0000449	AKAP8	10270	PAR-CLIP	21572407|20371350	Unspecified
hsa-mir-146a-5p	MIMAT0000449	MDN1	23195	HITS-CLIP	23824327	Unspecified
hsa-mir-146a-5p	MIMAT0000449	ATP13A3	79572	PAR-CLIP	21572407	Unspecified
hsa-mir-146a-5p	MIMAT0000449	PTGES2	80142	Luciferase reporter assay	23589616	Unspecified
hsa-mir-146a-5p	MIMAT0000449	EDEM3	80267	HITS-CLIP	23313552	Unspecified
hsa-mir-149-5p	MIMAT0000450	DNMT1	1786	CLASH	23622248	Unspecified
hsa-mir-149-5p	MIMAT0000450	FBN2	2201	CLASH	23622248	Unspecified
hsa-mir-149-5p	MIMAT0000450	GFER	2671	PAR-CLIP	23708386	Unspecified
hsa-mir-149-5p	MIMAT0000450	HDAC2	3066	CLASH	23622248	Unspecified
hsa-mir-149-5p	MIMAT0000450	NPTX1	4884	HITS-CLIP	23824327	Unspecified
hsa-mir-149-5p	MIMAT0000450	NUP98	4928	CLASH	23622248	Unspecified
hsa-mir-149-5p	MIMAT0000450	PSMD8	5714	CLASH	23622248	Unspecified
hsa-mir-149-5p	MIMAT0000450	RAB5C	5878	CLASH	23622248	Unspecified
hsa-mir-149-5p	MIMAT0000450	EIF4H	7458	CLASH	23622248	Unspecified
hsa-mir-149-5p	MIMAT0000450	NUP214	8021	CLASH	23622248	Unspecified
hsa-mir-149-5p	MIMAT0000450	ZNF318	24149	CLASH	23622248	Unspecified
hsa-mir-149-5p	MIMAT0000450	AAR2	25980	PAR-CLIP	23592263	Unspecified
hsa-mir-149-5p	MIMAT0000450	AATF	26574	CLASH	23622248	Unspecified
hsa-mir-149-5p	MIMAT0000450	PABPC1	26986	CLASH	23622248	Unspecified
hsa-mir-149-5p	MIMAT0000450	CDK5RAP2	55755	CLASH	23622248	Unspecified
hsa-mir-149-5p	MIMAT0000450	ERGIC1	57222	HITS-CLIP	23824327	Unspecified
hsa-mir-149-5p	MIMAT0000450	MRPS25	64432	CLASH	23622248	Unspecified
hsa-mir-149-5p	MIMAT0000450	DCTPP1	79077	HITS-CLIP	19536157	Unspecified
hsa-mir-149-5p	MIMAT0000450	DNAJC19	131118	CLASH	23622248	Unspecified
hsa-mir-150-5p	MIMAT0000451	F2RL1	2150	HITS-CLIP	23313552	Unspecified
hsa-mir-150-5p	MIMAT0000451	GOLGA2	2801	HITS-CLIP	19536157	Unspecified
hsa-mir-150-5p	MIMAT0000451	PRIM1	5557	HITS-CLIP	23313552	Unspecified
hsa-mir-150-5p	MIMAT0000451	ELOB	6923	HITS-CLIP	23824327	Unspecified
hsa-mir-150-5p	MIMAT0000451	CEP135	9662	HITS-CLIP	23824327	Unspecified
hsa-mir-150-5p	MIMAT0000451	MRPS27	23107	PAR-CLIP	23592263	Unspecified
hsa-mir-150-5p	MIMAT0000451	POFUT1	23509	HITS-CLIP	23824327	Unspecified
hsa-mir-150-5p	MIMAT0000451	TOR1AIP1	26092	PAR-CLIP	27292025	Unspecified
hsa-mir-150-5p	MIMAT0000451	TIMM10	26519	HITS-CLIP	23313552	Unspecified
hsa-mir-150-5p	MIMAT0000451	RBM41	55285	HITS-CLIP	23313552	Unspecified
hsa-mir-150-5p	MIMAT0000451	ATP13A3	79572	CLASH	23622248	Unspecified
hsa-mir-150-5p	MIMAT0000451	FOXRED2	80020	HITS-CLIP	23313552	Unspecified
hsa-mir-150-5p	MIMAT0000451	MIPOL1	145282	HITS-CLIP	23824327	Unspecified
hsa-mir-154-5p	MIMAT0000452	CIT	11113	PAR-CLIP	22012620	Unspecified
hsa-mir-154-5p	MIMAT0000452	PLEKHF2	79666	PAR-CLIP	24398324|20371350	Unspecified
hsa-mir-154-3p	MIMAT0000453	NGDN	25983	HITS-CLIP	19536157	Unspecified
hsa-mir-184	MIMAT0000454	SELENOS	55829	HITS-CLIP//PAR-CLIP	22012620|20371350|23313552	Unspecified
hsa-mir-185-5p	MIMAT0000455	RHOA	387	Luciferase reporter assay//qRT-PCR//Western blot	21186079|27250838	Unspecified
hsa-mir-185-5p	MIMAT0000455	ATP6AP1	537	HITS-CLIP	23313552	Unspecified
hsa-mir-185-5p	MIMAT0000455	SCARB1	949	Luciferase reporter assay	23459944	Unspecified
hsa-mir-185-5p	MIMAT0000455	DNMT1	1786	Flow//Immunoprecipitaion//Luciferase reporter assay//Microarray//qRT-PCR//Quantitative proteomic approach//Western blot	21962230|23846337|23318422	Unspecified
hsa-mir-185-5p	MIMAT0000455	TLE3	7090	PAR-CLIP	23592263	Unspecified
hsa-mir-185-5p	MIMAT0000455	EIF4H	7458	CLASH//PAR-CLIP	23622248|26701625	Unspecified
hsa-mir-185-5p	MIMAT0000455	RAE1	8480	CLASH	23622248	Unspecified
hsa-mir-185-5p	MIMAT0000455	G3BP1	10146	PAR-CLIP	23592263|21572407	Unspecified
hsa-mir-185-5p	MIMAT0000455	VPS39	23339	PAR-CLIP	23592263	Unspecified
hsa-mir-185-5p	MIMAT0000455	PLD3	23646	PAR-CLIP	26701625	Unspecified
hsa-mir-185-5p	MIMAT0000455	CCDC86	79080	PAR-CLIP	23592263	Unspecified
hsa-mir-185-5p	MIMAT0000455	SLC30A7	148867	PAR-CLIP	20371350	Unspecified
hsa-mir-186-5p	MIMAT0000456	ITGB1	3688	CLASH	23622248	Unspecified
hsa-mir-186-5p	MIMAT0000456	PKP2	5318	CLASH	23622248	Unspecified
hsa-mir-186-5p	MIMAT0000456	PSMD8	5714	CLASH	23622248	Unspecified
hsa-mir-186-5p	MIMAT0000456	RAB2A	5862	PAR-CLIP	23592263|26701625	Unspecified
hsa-mir-186-5p	MIMAT0000456	RALA	5898	CLASH	23622248	Unspecified
hsa-mir-186-5p	MIMAT0000456	UPF1	5976	PAR-CLIP	22100165	Unspecified
hsa-mir-186-5p	MIMAT0000456	SRP19	6728	HITS-CLIP	23824327	Unspecified
hsa-mir-186-5p	MIMAT0000456	TBCA	6902	HITS-CLIP	23824327	Unspecified
hsa-mir-186-5p	MIMAT0000456	CSDE1	7812	PAR-CLIP	23446348|21572407|20371350	Unspecified
hsa-mir-186-5p	MIMAT0000456	PABPC4	8761	CLASH	23622248	Unspecified
hsa-mir-186-5p	MIMAT0000456	DDX21	9188	CLASH	23622248	Unspecified
hsa-mir-186-5p	MIMAT0000456	GCC2	9648	PAR-CLIP	24398324|21572407|20371350	Unspecified
hsa-mir-186-5p	MIMAT0000456	G3BP1	10146	CLASH	23622248	Unspecified
hsa-mir-186-5p	MIMAT0000456	MDN1	23195	CLASH	23622248	Unspecified
hsa-mir-186-5p	MIMAT0000456	NUP62	23636	Sequencing	20371350	Unspecified
hsa-mir-186-5p	MIMAT0000456	RPL36	25873	CLASH	23622248	Unspecified
hsa-mir-186-5p	MIMAT0000456	CHMP2A	27243	CLASH	23622248	Unspecified
hsa-mir-186-5p	MIMAT0000456	TBK1	29110	PAR-CLIP	23446348|20371350	Unspecified
hsa-mir-186-5p	MIMAT0000456	GOLGA7	51125	CLASH	23622248	Unspecified
hsa-mir-186-5p	MIMAT0000456	RBM28	55131	CLASH	23622248	Unspecified
hsa-mir-186-5p	MIMAT0000456	MAP7D1	55700	CLASH	23622248	Unspecified
hsa-mir-186-5p	MIMAT0000456	NGLY1	55768	CLASH	23622248	Unspecified
hsa-mir-186-5p	MIMAT0000456	FOXRED2	80020	CLASH	23622248	Unspecified
hsa-mir-186-5p	MIMAT0000456	SLC30A7	148867	PAR-CLIP	20371350	Unspecified
hsa-mir-186-5p	MIMAT0000456	TRIM59	286827	PAR-CLIP	22100165|22291592	Unspecified
hsa-mir-188-5p	MIMAT0000457	G3BP2	9908	HITS-CLIP	23824327	Unspecified
hsa-mir-188-5p	MIMAT0000457	ZDHHC5	25921	HITS-CLIP	23824327	Unspecified
hsa-mir-188-5p	MIMAT0000457	SBNO1	55206	CLASH	23622248	Unspecified
hsa-mir-190a-5p	MIMAT0000458	MARK2	2011	Immunofluorescence//Luciferase reporter assay//qRT-PCR//Western blot	24009311	Unspecified
hsa-mir-190a-5p	MIMAT0000458	CSDE1	7812	PAR-CLIP	21572407	Unspecified
hsa-mir-190a-5p	MIMAT0000458	SIGMAR1	10280	HITS-CLIP	27418678	Unspecified
hsa-mir-193a-3p	MIMAT0000459	DCAF7	10238	HITS-CLIP//PAR-CLIP	22473208|23446348|20371350	Unspecified
hsa-mir-193a-3p	MIMAT0000459	HYOU1	10525	Luciferase reporter assay//Microarray//Western blot	28276476	Unspecified
hsa-mir-193a-3p	MIMAT0000459	TAPT1	202018	CLASH	23622248	Unspecified
hsa-mir-194-5p	MIMAT0000460	EIF4H	7458	PAR-CLIP	26701625	Unspecified
hsa-mir-194-5p	MIMAT0000460	RBX1	9978	Flow//Luciferase reporter assay//qRT-PCR//Western blot	25412959	Unspecified
hsa-mir-194-5p	MIMAT0000460	TMED5	50999	HITS-CLIP//PAR-CLIP	23592263|24906430	Unspecified
hsa-mir-195-5p	MIMAT0000461	GNB1	2782	HITS-CLIP//PAR-CLIP	22473208|23592263|21572407|20371350	Unspecified
hsa-mir-195-5p	MIMAT0000461	PRKAR2A	5576	PAR-CLIP	23592263|23446348|21572407|20371350	Unspecified
hsa-mir-195-5p	MIMAT0000461	CSDE1	7812	HITS-CLIP	22473208	Unspecified
hsa-mir-195-5p	MIMAT0000461	CUL2	8453	HITS-CLIP	22473208	Unspecified
hsa-mir-195-5p	MIMAT0000461	RNF41	10193	HITS-CLIP	23824327	Unspecified
hsa-mir-195-5p	MIMAT0000461	HYOU1	10525	HITS-CLIP	22473208	Unspecified
hsa-mir-195-5p	MIMAT0000461	RPL36	25873	HITS-CLIP	22473208	Unspecified
hsa-mir-195-5p	MIMAT0000461	SBNO1	55206	PAR-CLIP	23446348|21572407|20371350	Unspecified
hsa-mir-195-5p	MIMAT0000461	RTN4	57142	PAR-CLIP	21572407	Unspecified
hsa-mir-195-5p	MIMAT0000461	MIB1	57534	HITS-CLIP	22473208	Unspecified
hsa-mir-195-5p	MIMAT0000461	ATP13A3	79572	HITS-CLIP	22473208	Unspecified
hsa-mir-195-5p	MIMAT0000461	CLIP4	79745	PAR-CLIP	21572407|20371350	Unspecified
hsa-mir-206	MIMAT0000462	RAB5C	5878	PAR-CLIP	23592263|23446348|21572407|20371350|26701625	Unspecified
hsa-mir-206	MIMAT0000462	STC2	8614	qRT-PCR	24855559	Unspecified
hsa-mir-206	MIMAT0000462	MRPS27	23107	PAR-CLIP	23592263	Unspecified
hsa-mir-206	MIMAT0000462	EXOSC2	23404	PAR-CLIP	27292025	Unspecified
hsa-mir-320a	MIMAT0000510	MARK2	2011	CLASH	23622248	Unspecified
hsa-mir-320a	MIMAT0000510	PPT1	5538	CLASH	23622248	Unspecified
hsa-mir-320a	MIMAT0000510	RAB2A	5862	CLASH	23622248	Unspecified
hsa-mir-320a	MIMAT0000510	CSDE1	7812	CLASH	23622248	Unspecified
hsa-mir-320a	MIMAT0000510	UBAP2L	9898	CLASH	23622248	Unspecified
hsa-mir-320a	MIMAT0000510	G3BP1	10146	CLASH	23622248	Unspecified
hsa-mir-320a	MIMAT0000510	RNF41	10193	CLASH	23622248	Unspecified
hsa-mir-320a	MIMAT0000510	TUBGCP2	10844	CLASH	23622248	Unspecified
hsa-mir-320a	MIMAT0000510	ERC1	23085	CLASH	23622248	Unspecified
hsa-mir-320a	MIMAT0000510	BRD4	23476	CLASH	23622248	Unspecified
hsa-mir-320a	MIMAT0000510	PLD3	23646	CLASH	23622248	Unspecified
hsa-mir-320a	MIMAT0000510	ZNF318	24149	CLASH	23622248	Unspecified
hsa-mir-320a	MIMAT0000510	RPL36	25873	CLASH	23622248	Unspecified
hsa-mir-320a	MIMAT0000510	STOML2	30968	CLASH	23622248	Unspecified
hsa-mir-320a	MIMAT0000510	RAB14	51552	Immunohistochemistry//Luciferase reporter assay//qRT-PCR//Western blot	27994670	Unspecified
hsa-mir-320a	MIMAT0000510	UBAP2	55833	CLASH	23622248	Unspecified
hsa-mir-320a	MIMAT0000510	RTN4	57142	CLASH	23622248	Unspecified
hsa-mir-320a	MIMAT0000510	MRPS5	64969	CLASH	23622248	Unspecified
hsa-mir-200c-3p	MIMAT0000617	RHOA	387	Luciferase reporter assay//qRT-PCR//Western blot	23272142	Unspecified
hsa-mir-200c-3p	MIMAT0000617	ELOC	6921	PAR-CLIP	24398324|26701625|27292025	Unspecified
hsa-mir-200c-3p	MIMAT0000617	FBLN5	10516	Luciferase reporter assay//Western blot	22685266|22569286	Unspecified
hsa-mir-200c-3p	MIMAT0000617	PABPC1	26986	HITS-CLIP	19536157	Unspecified
hsa-mir-200c-3p	MIMAT0000617	TBK1	29110	Luciferase reporter assay//PAR-CLIP//Western blot	22991189|24398324	Unspecified
hsa-mir-200c-3p	MIMAT0000617	ERMP1	79956	PAR-CLIP	22012620	Unspecified
hsa-mir-155-5p	MIMAT0000646	RHOA	387	Luciferase reporter assay//qRT-PCR//Western blot	18794355|28146427	Unspecified
hsa-mir-155-5p	MIMAT0000646	DDX10	1662	Proteomics	18668040	Unspecified
hsa-mir-155-5p	MIMAT0000646	DNMT1	1786	Proteomics	18668040	Unspecified
hsa-mir-155-5p	MIMAT0000646	MOV10	4343	Proteomics	18668040	Unspecified
hsa-mir-155-5p	MIMAT0000646	NEU1	4758	Proteomics	18668040	Unspecified
hsa-mir-155-5p	MIMAT0000646	PCNT	5116	Proteomics	18668040	Unspecified
hsa-mir-155-5p	MIMAT0000646	PRKAR2A	5576	Proteomics	18668040	Unspecified
hsa-mir-155-5p	MIMAT0000646	RAB2A	5862	Proteomics	18668040	Unspecified
hsa-mir-155-5p	MIMAT0000646	RAB5C	5878	PAR-CLIP//Proteomics//pSILAC	18668040|27292025	Unspecified
hsa-mir-155-5p	MIMAT0000646	TBCA	6902	Proteomics//pSILAC//Reporter assay	18668040|20584899	Unspecified
hsa-mir-155-5p	MIMAT0000646	TCF12	6938	Reporter assay	20584899	Unspecified
hsa-mir-155-5p	MIMAT0000646	EIF4E2	9470	Proteomics	18668040	Unspecified
hsa-mir-155-5p	MIMAT0000646	BAG5	9529	HITS-CLIP//Proteomics	18668040|22473208	Unspecified
hsa-mir-155-5p	MIMAT0000646	DCAF7	10238	Proteomics//pSILAC	18668040	Unspecified
hsa-mir-155-5p	MIMAT0000646	SLC27A2	11001	Proteomics	18668040	Unspecified
hsa-mir-155-5p	MIMAT0000646	MRPS27	23107	HITS-CLIP//Proteomics//Reporter assay	18668040|20584899|22473208	Unspecified
hsa-mir-155-5p	MIMAT0000646	DPY19L1	23333	HITS-CLIP//PAR-CLIP	22473208|23592263	Unspecified
hsa-mir-155-5p	MIMAT0000646	EXOSC2	23404	Reporter assay	20584899	Unspecified
hsa-mir-155-5p	MIMAT0000646	NUP62	23636	Proteomics	18668040	Unspecified
hsa-mir-155-5p	MIMAT0000646	GHITM	27069	PAR-CLIP//Proteomics	18668040|20371350	Unspecified
hsa-mir-155-5p	MIMAT0000646	MAT2B	27430	Proteomics	18668040	Unspecified
hsa-mir-155-5p	MIMAT0000646	RAB14	51552	Proteomics	18668040	Unspecified
hsa-mir-155-5p	MIMAT0000646	PLEKHA5	54477	Proteomics	18668040	Unspecified
hsa-mir-155-5p	MIMAT0000646	TRMT1	55621	Proteomics	18668040	Unspecified
hsa-mir-155-5p	MIMAT0000646	ERGIC1	57222	Proteomics	18668040	Unspecified
hsa-mir-155-5p	MIMAT0000646	COLGALT1	79709	HITS-CLIP//Proteomics	18668040|22473208	Unspecified
hsa-mir-155-5p	MIMAT0000646	ERMP1	79956	Proteomics//pSILAC	18668040	Unspecified
hsa-mir-155-5p	MIMAT0000646	EDEM3	80267	Proteomics//pSILAC	18668040	Unspecified
hsa-mir-155-5p	MIMAT0000646	GRPEL1	80273	Proteomics	18668040	Unspecified
hsa-mir-155-5p	MIMAT0000646	INTS4	92105	Proteomics	18668040	Unspecified
hsa-mir-155-5p	MIMAT0000646	DNAJC19	131118	pSILAC//qRT-PCR	18668040|20584899	Unspecified
hsa-mir-155-5p	MIMAT0000646	SLC30A7	148867	Proteomics	18668040	Unspecified
hsa-mir-155-5p	MIMAT0000646	TAPT1	202018	HITS-CLIP	22473208	Unspecified
hsa-mir-155-5p	MIMAT0000646	TYSND1	219743	Proteomics	18668040	Unspecified
hsa-mir-106b-5p	MIMAT0000680	F2RL1	2150	HITS-CLIP	23313552	Unspecified
hsa-mir-106b-5p	MIMAT0000680	GOLGA2	2801	HITS-CLIP	19536157	Unspecified
hsa-mir-106b-5p	MIMAT0000680	ITGB1	3688	PAR-CLIP	20371350	Unspecified
hsa-mir-106b-5p	MIMAT0000680	NUP98	4928	HITS-CLIP	22473208	Unspecified
hsa-mir-106b-5p	MIMAT0000680	PRIM1	5557	HITS-CLIP//PAR-CLIP	23446348|23313552	Unspecified
hsa-mir-106b-5p	MIMAT0000680	PVR	5817	PAR-CLIP	21572407|20371350	Unspecified
hsa-mir-106b-5p	MIMAT0000680	ELOC	6921	HITS-CLIP	23824327	Unspecified
hsa-mir-106b-5p	MIMAT0000680	EIF4H	7458	PAR-CLIP	22012620|21572407|20371350	Unspecified
hsa-mir-106b-5p	MIMAT0000680	NSD2	7468	HITS-CLIP	22473208	Unspecified
hsa-mir-106b-5p	MIMAT0000680	CSDE1	7812	PAR-CLIP	21572407	Unspecified
hsa-mir-106b-5p	MIMAT0000680	REEP5	7905	HITS-CLIP	22473208	Unspecified
hsa-mir-106b-5p	MIMAT0000680	RAB10	10890	PAR-CLIP	21572407|20371350|27292025	Unspecified
hsa-mir-106b-5p	MIMAT0000680	CIT	11113	HITS-CLIP	22473208	Unspecified
hsa-mir-106b-5p	MIMAT0000680	EMC1	23065	PAR-CLIP	22100165	Unspecified
hsa-mir-106b-5p	MIMAT0000680	POFUT1	23509	HITS-CLIP	22473208	Unspecified
hsa-mir-106b-5p	MIMAT0000680	NIN	51199	PAR-CLIP	23592263|21572407	Unspecified
hsa-mir-106b-5p	MIMAT0000680	PDZD11	51248	HITS-CLIP	22473208	Unspecified
hsa-mir-106b-5p	MIMAT0000680	RBM41	55285	HITS-CLIP	23313552	Unspecified
hsa-mir-106b-5p	MIMAT0000680	SMOC1	64093	PAR-CLIP	21572407	Unspecified
hsa-mir-106b-5p	MIMAT0000680	CRTC3	64784	HITS-CLIP	22473208	Unspecified
hsa-mir-106b-5p	MIMAT0000680	DCTPP1	79077	CLASH	23622248	Unspecified
hsa-mir-106b-5p	MIMAT0000680	C1orf50	79078	HITS-CLIP	23313552	Unspecified
hsa-mir-106b-5p	MIMAT0000680	FYCO1	79443	HITS-CLIP	22473208	Unspecified
hsa-mir-106b-5p	MIMAT0000680	CLIP4	79745	PAR-CLIP	20371350	Unspecified
hsa-mir-106b-5p	MIMAT0000680	FOXRED2	80020	HITS-CLIP	23313552	Unspecified
hsa-mir-106b-5p	MIMAT0000680	PIGO	84720	HITS-CLIP	22473208	Unspecified
hsa-mir-106b-5p	MIMAT0000680	ZC3H18	124245	CLASH	23622248	Unspecified
hsa-mir-106b-5p	MIMAT0000680	SLC30A7	148867	PAR-CLIP	23592263	Unspecified
hsa-mir-29c-3p	MIMAT0000681	FBN1	2200	Luciferase reporter assay//qRT-PCR	18390668|22745231	Unspecified
hsa-mir-29c-3p	MIMAT0000681	ITGB1	3688	Luciferase reporter assay//Microarray//qRT-PCR//Western blot	26766915|24870620	Unspecified
hsa-mir-29c-3p	MIMAT0000681	LOX	4015	Luciferase reporter assay	22745231	Unspecified
hsa-mir-29c-3p	MIMAT0000681	PPT1	5538	CLASH	23622248	Unspecified
hsa-mir-29c-3p	MIMAT0000681	DDX21	9188	Sequencing	20371350	Unspecified
hsa-mir-29c-3p	MIMAT0000681	CEP68	23177	Sequencing	20371350	Unspecified
hsa-mir-29c-3p	MIMAT0000681	GOLGA7	51125	PAR-CLIP	22012620	Unspecified
hsa-mir-29c-3p	MIMAT0000681	PIGS	94005	HITS-CLIP	23824327	Unspecified
hsa-mir-200a-3p	MIMAT0000682	DNMT1	1786	ChIP-seq//qRT-PCR//Western blot	25595591	Unspecified
hsa-mir-200a-3p	MIMAT0000682	G3BP2	9908	Microarray//Northern blot	16331254	Unspecified
hsa-mir-200a-3p	MIMAT0000682	DPY19L1	23333	PAR-CLIP	22100165	Unspecified
hsa-mir-200a-3p	MIMAT0000682	RBM28	55131	HITS-CLIP	23313552	Unspecified
hsa-mir-302a-5p	MIMAT0000683	GNB1	2782	PAR-CLIP	21572407	Unspecified
hsa-mir-302a-5p	MIMAT0000683	G3BP2	9908	PAR-CLIP	21572407	Unspecified
hsa-mir-302a-3p	MIMAT0000684	MARK2	2011	PAR-CLIP	23592263	Unspecified
hsa-mir-302a-3p	MIMAT0000684	F2RL1	2150	HITS-CLIP	23313552	Unspecified
hsa-mir-302a-3p	MIMAT0000684	GOLGA2	2801	HITS-CLIP	19536157	Unspecified
hsa-mir-302a-3p	MIMAT0000684	PRIM1	5557	HITS-CLIP//PAR-CLIP	23446348|23313552	Unspecified
hsa-mir-302a-3p	MIMAT0000684	ELOC	6921	HITS-CLIP	23824327	Unspecified
hsa-mir-302a-3p	MIMAT0000684	EMC1	23065	PAR-CLIP	22100165	Unspecified
hsa-mir-302a-3p	MIMAT0000684	TIMM10	26519	HITS-CLIP	23313552	Unspecified
hsa-mir-302a-3p	MIMAT0000684	SBNO1	55206	PAR-CLIP	23446348	Unspecified
hsa-mir-302a-3p	MIMAT0000684	RBM41	55285	HITS-CLIP	23313552	Unspecified
hsa-mir-302a-3p	MIMAT0000684	C1orf50	79078	HITS-CLIP	23313552	Unspecified
hsa-mir-302a-3p	MIMAT0000684	CLIP4	79745	PAR-CLIP	20371350	Unspecified
hsa-mir-302a-3p	MIMAT0000684	FOXRED2	80020	HITS-CLIP	23313552	Unspecified
hsa-mir-302a-3p	MIMAT0000684	PIGO	84720	HITS-CLIP	23313552	Unspecified
hsa-mir-34c-5p	MIMAT0000686	PABPC1	26986	qRT-PCR//Western blot	26097561	Unspecified
hsa-mir-34c-5p	MIMAT0000686	EDEM3	80267	PAR-CLIP	23592263	Unspecified
hsa-mir-299-3p	MIMAT0000687	RAB7A	7879	HITS-CLIP	24906430	Unspecified
hsa-mir-299-3p	MIMAT0000687	MRPS27	23107	PAR-CLIP	23592263	Unspecified
hsa-mir-301a-3p	MIMAT0000688	F2RL1	2150	HITS-CLIP	23824327	Unspecified
hsa-mir-301a-3p	MIMAT0000688	NPTX1	4884	PAR-CLIP	20371350	Unspecified
hsa-mir-301a-3p	MIMAT0000688	USP13	8975	PAR-CLIP	21572407	Unspecified
hsa-mir-301a-3p	MIMAT0000688	SPART	23111	PAR-CLIP	23446348|21572407|20371350	Unspecified
hsa-mir-301a-3p	MIMAT0000688	SUN2	25777	PAR-CLIP	21572407|20371350	Unspecified
hsa-mir-301a-3p	MIMAT0000688	TMED5	50999	CLASH	23622248	Unspecified
hsa-mir-301a-3p	MIMAT0000688	PDZD11	51248	PAR-CLIP	23592263|21572407	Unspecified
hsa-mir-301a-3p	MIMAT0000688	RAB14	51552	PAR-CLIP	23592263	Unspecified
hsa-mir-301a-3p	MIMAT0000688	SMOC1	64093	PAR-CLIP	21572407	Unspecified
hsa-mir-301a-3p	MIMAT0000688	PLEKHF2	79666	PAR-CLIP	24398324|21572407	Unspecified
hsa-mir-301a-3p	MIMAT0000688	SNIP1	79753	Luciferase reporter assay//qRT-PCR	26338824	Unspecified
hsa-mir-99b-5p	MIMAT0000689	FAM8A1	51439	CLASH	23622248	Unspecified
hsa-mir-296-5p	MIMAT0000690	DPY19L1	23333	PAR-CLIP	22291592	Unspecified
hsa-mir-130b-3p	MIMAT0000691	F2RL1	2150	HITS-CLIP	23824327	Unspecified
hsa-mir-130b-3p	MIMAT0000691	ITGB1	3688	Luciferase reporter assay//qRT-PCR//Western blot	24498407	Unspecified
hsa-mir-130b-3p	MIMAT0000691	NPTX1	4884	PAR-CLIP	20371350	Unspecified
hsa-mir-130b-3p	MIMAT0000691	USP13	8975	PAR-CLIP	21572407	Unspecified
hsa-mir-130b-3p	MIMAT0000691	RNF41	10193	Sequencing	20371350	Unspecified
hsa-mir-130b-3p	MIMAT0000691	ATE1	11101	Sequencing	20371350	Unspecified
hsa-mir-130b-3p	MIMAT0000691	SPART	23111	PAR-CLIP//Sequencing	20371350|23446348|21572407	Unspecified
hsa-mir-130b-3p	MIMAT0000691	SUN2	25777	PAR-CLIP//Sequencing	20371350|21572407	Unspecified
hsa-mir-130b-3p	MIMAT0000691	NIN	51199	Sequencing	20371350	Unspecified
hsa-mir-130b-3p	MIMAT0000691	PDZD11	51248	PAR-CLIP//Sequencing	20371350|23592263|21572407	Unspecified
hsa-mir-130b-3p	MIMAT0000691	RAB14	51552	PAR-CLIP	23592263	Unspecified
hsa-mir-130b-3p	MIMAT0000691	SMOC1	64093	PAR-CLIP	21572407	Unspecified
hsa-mir-130b-3p	MIMAT0000691	FYCO1	79443	Sequencing	20371350	Unspecified
hsa-mir-130b-3p	MIMAT0000691	PLEKHF2	79666	PAR-CLIP	24398324|21572407	Unspecified
hsa-mir-130b-3p	MIMAT0000691	TRIM59	286827	Sequencing	20371350	Unspecified
hsa-mir-30e-5p	MIMAT0000692	PCNT	5116	CLASH	23622248	Unspecified
hsa-mir-30e-5p	MIMAT0000692	ADAM9	8754	HITS-CLIP	23313552	Unspecified
hsa-mir-30e-5p	MIMAT0000692	CEP350	9857	HITS-CLIP	22473208	Unspecified
hsa-mir-30e-5p	MIMAT0000692	RAB10	10890	PAR-CLIP	21572407	Unspecified
hsa-mir-30e-5p	MIMAT0000692	CLCC1	23155	HITS-CLIP	22473208	Unspecified
hsa-mir-30e-5p	MIMAT0000692	LARP1	23367	PAR-CLIP	23592263|24398324|20371350	Unspecified
hsa-mir-30e-5p	MIMAT0000692	FAM8A1	51439	PAR-CLIP	21572407	Unspecified
hsa-mir-30e-5p	MIMAT0000692	MIB1	57534	HITS-CLIP	22473208	Unspecified
hsa-mir-30e-5p	MIMAT0000692	FYCO1	79443	PAR-CLIP	21572407	Unspecified
hsa-mir-30e-3p	MIMAT0000693	NIN	51199	PAR-CLIP	23592263|21572407	Unspecified
hsa-mir-30e-3p	MIMAT0000693	CCDC86	79080	PAR-CLIP	23592263	Unspecified
hsa-mir-361-5p	MIMAT0000703	ATP6V1A	523	CLASH	23622248	Unspecified
hsa-mir-361-5p	MIMAT0000703	RAE1	8480	CLASH	23622248	Unspecified
hsa-mir-361-5p	MIMAT0000703	G3BP2	9908	Sequencing	20371350	Unspecified
hsa-mir-361-5p	MIMAT0000703	ERP44	23071	PAR-CLIP	22100165	Unspecified
hsa-mir-361-5p	MIMAT0000703	MTCH1	23787	PAR-CLIP	23592263	Unspecified
hsa-mir-361-5p	MIMAT0000703	AAR2	25980	PAR-CLIP	23592263	Unspecified
hsa-mir-362-5p	MIMAT0000705	OS9	10956	HITS-CLIP	27418678	Unspecified
hsa-mir-363-3p	MIMAT0000707	GGCX	2677	PAR-CLIP	27292025	Unspecified
hsa-mir-363-3p	MIMAT0000707	GOLGA3	2802	PAR-CLIP	22012620|21572407	Unspecified
hsa-mir-363-3p	MIMAT0000707	ZDHHC5	25921	HITS-CLIP	23824327	Unspecified
hsa-mir-363-3p	MIMAT0000707	RBM28	55131	HITS-CLIP//PAR-CLIP	23706177|27292025	Unspecified
hsa-mir-363-3p	MIMAT0000707	PTGES2	80142	PAR-CLIP	23592263	Unspecified
hsa-mir-363-3p	MIMAT0000707	PRRC2B	84726	PAR-CLIP	20371350	Unspecified
hsa-mir-365a-3p	MIMAT0000710	PRKACA	5566	CLASH	23622248	Unspecified
hsa-mir-302b-5p	MIMAT0000714	GGCX	2677	HITS-CLIP	23824327	Unspecified
hsa-mir-302b-5p	MIMAT0000714	AP3B1	8546	HITS-CLIP	23824327	Unspecified
hsa-mir-302b-3p	MIMAT0000715	MARK2	2011	PAR-CLIP	23592263	Unspecified
hsa-mir-302b-3p	MIMAT0000715	F2RL1	2150	HITS-CLIP	23313552	Unspecified
hsa-mir-302b-3p	MIMAT0000715	GOLGA2	2801	HITS-CLIP	19536157	Unspecified
hsa-mir-302b-3p	MIMAT0000715	PRIM1	5557	HITS-CLIP//PAR-CLIP	23446348|23313552	Unspecified
hsa-mir-302b-3p	MIMAT0000715	ELOC	6921	HITS-CLIP	23824327	Unspecified
hsa-mir-302b-3p	MIMAT0000715	EMC1	23065	PAR-CLIP	22100165	Unspecified
hsa-mir-302b-3p	MIMAT0000715	TIMM10	26519	HITS-CLIP	23313552	Unspecified
hsa-mir-302b-3p	MIMAT0000715	SBNO1	55206	PAR-CLIP	23446348	Unspecified
hsa-mir-302b-3p	MIMAT0000715	RBM41	55285	HITS-CLIP	23313552	Unspecified
hsa-mir-302b-3p	MIMAT0000715	C1orf50	79078	HITS-CLIP	23313552	Unspecified
hsa-mir-302b-3p	MIMAT0000715	CLIP4	79745	PAR-CLIP	20371350	Unspecified
hsa-mir-302b-3p	MIMAT0000715	FOXRED2	80020	HITS-CLIP	23313552	Unspecified
hsa-mir-302b-3p	MIMAT0000715	PIGO	84720	HITS-CLIP	23313552	Unspecified
hsa-mir-302c-5p	MIMAT0000716	GGCX	2677	HITS-CLIP	23824327	Unspecified
hsa-mir-302c-5p	MIMAT0000716	RAB10	10890	PAR-CLIP	21572407|20371350|27292025	Unspecified
hsa-mir-302c-5p	MIMAT0000716	ZYG11B	79699	HITS-CLIP	27418678	Unspecified
hsa-mir-302c-5p	MIMAT0000716	TRIM59	286827	PAR-CLIP	21572407	Unspecified
hsa-mir-302c-3p	MIMAT0000717	MARK2	2011	PAR-CLIP	23592263	Unspecified
hsa-mir-302c-3p	MIMAT0000717	F2RL1	2150	HITS-CLIP	23313552	Unspecified
hsa-mir-302c-3p	MIMAT0000717	GOLGA2	2801	HITS-CLIP	19536157	Unspecified
hsa-mir-302c-3p	MIMAT0000717	PRIM1	5557	HITS-CLIP//PAR-CLIP	23446348|23313552	Unspecified
hsa-mir-302c-3p	MIMAT0000717	ELOC	6921	HITS-CLIP	23824327	Unspecified
hsa-mir-302c-3p	MIMAT0000717	NUP58	9818	PAR-CLIP	22012620	Unspecified
hsa-mir-302c-3p	MIMAT0000717	EMC1	23065	PAR-CLIP	22100165	Unspecified
hsa-mir-302c-3p	MIMAT0000717	TIMM10	26519	HITS-CLIP	23313552	Unspecified
hsa-mir-302c-3p	MIMAT0000717	SBNO1	55206	PAR-CLIP	23446348	Unspecified
hsa-mir-302c-3p	MIMAT0000717	RBM41	55285	HITS-CLIP	23313552	Unspecified
hsa-mir-302c-3p	MIMAT0000717	C1orf50	79078	HITS-CLIP	23313552	Unspecified
hsa-mir-302c-3p	MIMAT0000717	CLIP4	79745	PAR-CLIP	20371350	Unspecified
hsa-mir-302c-3p	MIMAT0000717	FOXRED2	80020	HITS-CLIP	23313552	Unspecified
hsa-mir-302c-3p	MIMAT0000717	PIGO	84720	HITS-CLIP	23313552	Unspecified
hsa-mir-302d-3p	MIMAT0000718	MARK2	2011	PAR-CLIP	23592263	Unspecified
hsa-mir-302d-3p	MIMAT0000718	F2RL1	2150	HITS-CLIP	23313552	Unspecified
hsa-mir-302d-3p	MIMAT0000718	GOLGA2	2801	HITS-CLIP	19536157	Unspecified
hsa-mir-302d-3p	MIMAT0000718	PRIM1	5557	HITS-CLIP//PAR-CLIP	23446348|23313552	Unspecified
hsa-mir-302d-3p	MIMAT0000718	ELOC	6921	HITS-CLIP	23824327	Unspecified
hsa-mir-302d-3p	MIMAT0000718	EMC1	23065	PAR-CLIP	22100165	Unspecified
hsa-mir-302d-3p	MIMAT0000718	TIMM10	26519	HITS-CLIP	23313552	Unspecified
hsa-mir-302d-3p	MIMAT0000718	SBNO1	55206	PAR-CLIP	23446348	Unspecified
hsa-mir-302d-3p	MIMAT0000718	RBM41	55285	HITS-CLIP	23313552	Unspecified
hsa-mir-302d-3p	MIMAT0000718	C1orf50	79078	HITS-CLIP	23313552	Unspecified
hsa-mir-302d-3p	MIMAT0000718	CLIP4	79745	PAR-CLIP	20371350	Unspecified
hsa-mir-302d-3p	MIMAT0000718	FOXRED2	80020	HITS-CLIP	23313552	Unspecified
hsa-mir-302d-3p	MIMAT0000718	PIGO	84720	HITS-CLIP	23313552	Unspecified
hsa-mir-367-3p	MIMAT0000719	GGCX	2677	PAR-CLIP	27292025	Unspecified
hsa-mir-367-3p	MIMAT0000719	GOLGA3	2802	PAR-CLIP	22012620|21572407	Unspecified
hsa-mir-367-3p	MIMAT0000719	ZDHHC5	25921	HITS-CLIP	23824327	Unspecified
hsa-mir-367-3p	MIMAT0000719	RBM28	55131	HITS-CLIP//PAR-CLIP	23706177|27292025	Unspecified
hsa-mir-367-3p	MIMAT0000719	PTGES2	80142	PAR-CLIP	23592263	Unspecified
hsa-mir-367-3p	MIMAT0000719	PRRC2B	84726	PAR-CLIP	20371350	Unspecified
hsa-mir-376c-3p	MIMAT0000720	ARF6	382	PAR-CLIP	20371350	Unspecified
hsa-mir-376c-3p	MIMAT0000720	RAB1A	5861	PAR-CLIP	21572407	Unspecified
hsa-mir-376c-3p	MIMAT0000720	G3BP1	10146	PAR-CLIP	23592263	Unspecified
hsa-mir-376c-3p	MIMAT0000720	FAM8A1	51439	PAR-CLIP	21572407	Unspecified
hsa-mir-376c-3p	MIMAT0000720	ERO1B	56605	HITS-CLIP	24374217	Unspecified
hsa-mir-376c-3p	MIMAT0000720	RTN4	57142	PAR-CLIP	21572407	Unspecified
hsa-mir-369-3p	MIMAT0000721	HSBP1	3281	PAR-CLIP	21572407	Unspecified
hsa-mir-369-3p	MIMAT0000721	ZDHHC5	25921	HITS-CLIP//PAR-CLIP	23446348|21572407|20371350	Unspecified
hsa-mir-370-3p	MIMAT0000722	RAB7A	7879	HITS-CLIP	24906430	Unspecified
hsa-mir-370-3p	MIMAT0000722	NUP210	23225	HITS-CLIP	23313552	Unspecified
hsa-mir-371a-3p	MIMAT0000723	PIGO	84720	PAR-CLIP	26701625	Unspecified
hsa-mir-372-3p	MIMAT0000724	MARK2	2011	PAR-CLIP	23592263	Unspecified
hsa-mir-372-3p	MIMAT0000724	F2RL1	2150	HITS-CLIP	23313552	Unspecified
hsa-mir-372-3p	MIMAT0000724	GOLGA2	2801	HITS-CLIP	19536157	Unspecified
hsa-mir-372-3p	MIMAT0000724	PRIM1	5557	HITS-CLIP//PAR-CLIP	23446348|23313552	Unspecified
hsa-mir-372-3p	MIMAT0000724	ELOC	6921	HITS-CLIP	23824327	Unspecified
hsa-mir-372-3p	MIMAT0000724	EMC1	23065	PAR-CLIP	22100165	Unspecified
hsa-mir-372-3p	MIMAT0000724	TIMM10	26519	HITS-CLIP	23313552	Unspecified
hsa-mir-372-3p	MIMAT0000724	SBNO1	55206	PAR-CLIP	23446348	Unspecified
hsa-mir-372-3p	MIMAT0000724	RBM41	55285	HITS-CLIP	23313552	Unspecified
hsa-mir-372-3p	MIMAT0000724	C1orf50	79078	HITS-CLIP	23313552	Unspecified
hsa-mir-372-3p	MIMAT0000724	CLIP4	79745	PAR-CLIP	20371350	Unspecified
hsa-mir-372-3p	MIMAT0000724	FOXRED2	80020	HITS-CLIP	23313552	Unspecified
hsa-mir-372-3p	MIMAT0000724	PIGO	84720	HITS-CLIP	23313552	Unspecified
hsa-mir-373-5p	MIMAT0000725	GOLGA3	2802	HITS-CLIP	23824327	Unspecified
hsa-mir-373-5p	MIMAT0000725	EXOSC2	23404	HITS-CLIP	23313552	Unspecified
hsa-mir-373-5p	MIMAT0000725	FAR2	55711	PAR-CLIP	22012620|21572407	Unspecified
hsa-mir-373-5p	MIMAT0000725	PIGO	84720	HITS-CLIP	23824327	Unspecified
hsa-mir-373-3p	MIMAT0000726	CENPF	1063	Microarray	15685193	Unspecified
hsa-mir-373-3p	MIMAT0000726	MARK2	2011	PAR-CLIP	23592263	Unspecified
hsa-mir-373-3p	MIMAT0000726	F2RL1	2150	HITS-CLIP	23313552	Unspecified
hsa-mir-373-3p	MIMAT0000726	GOLGA2	2801	HITS-CLIP	19536157	Unspecified
hsa-mir-373-3p	MIMAT0000726	PRIM1	5557	HITS-CLIP//PAR-CLIP	23446348|23313552	Unspecified
hsa-mir-373-3p	MIMAT0000726	ELOC	6921	HITS-CLIP	23824327	Unspecified
hsa-mir-373-3p	MIMAT0000726	ADAM9	8754	Microarray	15685193	Unspecified
hsa-mir-373-3p	MIMAT0000726	NUP58	9818	Microarray	15685193	Unspecified
hsa-mir-373-3p	MIMAT0000726	EMC1	23065	PAR-CLIP	22100165	Unspecified
hsa-mir-373-3p	MIMAT0000726	TIMM10	26519	HITS-CLIP	23313552	Unspecified
hsa-mir-373-3p	MIMAT0000726	NIN	51199	Microarray	15685193	Unspecified
hsa-mir-373-3p	MIMAT0000726	SBNO1	55206	PAR-CLIP	23446348	Unspecified
hsa-mir-373-3p	MIMAT0000726	RBM41	55285	HITS-CLIP	23313552	Unspecified
hsa-mir-373-3p	MIMAT0000726	C1orf50	79078	HITS-CLIP	23313552	Unspecified
hsa-mir-373-3p	MIMAT0000726	FYCO1	79443	Microarray	15685193	Unspecified
hsa-mir-373-3p	MIMAT0000726	CLIP4	79745	PAR-CLIP	20371350	Unspecified
hsa-mir-373-3p	MIMAT0000726	FOXRED2	80020	HITS-CLIP	23313552	Unspecified
hsa-mir-373-3p	MIMAT0000726	PIGO	84720	HITS-CLIP	23313552	Unspecified
hsa-mir-374a-5p	MIMAT0000727	HSBP1	3281	PAR-CLIP	21572407	Unspecified
hsa-mir-374a-5p	MIMAT0000727	LMAN2	10960	PAR-CLIP	20371350	Unspecified
hsa-mir-374a-5p	MIMAT0000727	DPY19L1	23333	HITS-CLIP	22473208	Unspecified
hsa-mir-374a-5p	MIMAT0000727	LARP1	23367	HITS-CLIP	22473208	Unspecified
hsa-mir-374a-5p	MIMAT0000727	HECTD1	25831	HITS-CLIP	22473208	Unspecified
hsa-mir-374a-5p	MIMAT0000727	ZDHHC5	25921	HITS-CLIP//PAR-CLIP	23446348|21572407|20371350	Unspecified
hsa-mir-374a-5p	MIMAT0000727	MIB1	57534	HITS-CLIP	22473208	Unspecified
hsa-mir-375	MIMAT0000728	RHOA	387	Microarray//qRT-PCR//Western blot	20584986	Unspecified
hsa-mir-375	MIMAT0000728	CENPF	1063	Microarray	20215506	Unspecified
hsa-mir-375	MIMAT0000728	ACSL3	2181	Microarray	20215506	Unspecified
hsa-mir-375	MIMAT0000728	ITGB1	3688	Microarray//qRT-PCR	20584986	Unspecified
hsa-mir-375	MIMAT0000728	TCF12	6938	Microarray	20215506	Unspecified
hsa-mir-375	MIMAT0000728	REEP5	7905	HITS-CLIP	27418678	Unspecified
hsa-mir-375	MIMAT0000728	AP3B1	8546	HITS-CLIP	19536157	Unspecified
hsa-mir-375	MIMAT0000728	NUP58	9818	Microarray	20215506	Unspecified
hsa-mir-375	MIMAT0000728	RAB10	10890	Microarray//qRT-PCR	20584986	Unspecified
hsa-mir-375	MIMAT0000728	LMAN2	10960	Microarray	20215506	Unspecified
hsa-mir-375	MIMAT0000728	ERP44	23071	Microarray	20215506	Unspecified
hsa-mir-375	MIMAT0000728	DPY19L1	23333	Microarray	20215506	Unspecified
hsa-mir-375	MIMAT0000728	IL17RA	23765	Microarray	20215506	Unspecified
hsa-mir-375	MIMAT0000728	MAT2B	27430	Microarray	20215506	Unspecified
hsa-mir-375	MIMAT0000728	TMED5	50999	Microarray	20215506	Unspecified
hsa-mir-375	MIMAT0000728	NIN	51199	Microarray	20215506	Unspecified
hsa-mir-375	MIMAT0000728	NUP54	53371	HITS-CLIP//PAR-CLIP	23446348|21572407	Unspecified
hsa-mir-375	MIMAT0000728	CHPF	79586	Microarray	20215506	Unspecified
hsa-mir-376a-3p	MIMAT0000729	ERO1B	56605	HITS-CLIP	24374217	Unspecified
hsa-mir-377-3p	MIMAT0000730	DNMT1	1786	Luciferase reporter assay//qRT-PCR//Western blot	28277545	Unspecified
hsa-mir-377-3p	MIMAT0000730	RNF41	10193	HITS-CLIP	23824327	Unspecified
hsa-mir-377-3p	MIMAT0000730	MYCBP2	23077	HITS-CLIP	24374217	Unspecified
hsa-mir-377-3p	MIMAT0000730	TIMM10	26519	HITS-CLIP	23824327	Unspecified
hsa-mir-377-3p	MIMAT0000730	MAT2B	27430	PAR-CLIP	21572407	Unspecified
hsa-mir-377-3p	MIMAT0000730	ZYG11B	79699	PAR-CLIP	22012620	Unspecified
hsa-mir-378a-5p	MIMAT0000731	IDE	3416	HITS-CLIP	23824327	Unspecified
hsa-mir-378a-5p	MIMAT0000731	IMPDH2	3615	CLASH	23622248	Unspecified
hsa-mir-378a-5p	MIMAT0000731	MOGS	7841	CLASH	23622248	Unspecified
hsa-mir-378a-5p	MIMAT0000731	RNF41	10193	PAR-CLIP	21572407	Unspecified
hsa-mir-378a-5p	MIMAT0000731	NUP62	23636	HITS-CLIP	23824327|19536157	Unspecified
hsa-mir-378a-5p	MIMAT0000731	TIMM10	26519	HITS-CLIP	23824327	Unspecified
hsa-mir-378a-5p	MIMAT0000731	AKAP8L	26993	CLASH	23622248	Unspecified
hsa-mir-378a-5p	MIMAT0000731	FYCO1	79443	CLASH	23622248	Unspecified
hsa-mir-378a-5p	MIMAT0000731	PIGO	84720	HITS-CLIP	23824327	Unspecified
hsa-mir-378a-5p	MIMAT0000731	TIMM29	90580	HITS-CLIP	23824327	Unspecified
hsa-mir-378a-3p	MIMAT0000732	CYB5R3	1727	CLASH	23622248	Unspecified
hsa-mir-378a-3p	MIMAT0000732	EIF4H	7458	CLASH	23622248	Unspecified
hsa-mir-378a-3p	MIMAT0000732	NDFIP2	54602	CLASH	23622248	Unspecified
hsa-mir-378a-3p	MIMAT0000732	DCTPP1	79077	HITS-CLIP	19536157	Unspecified
hsa-mir-378a-3p	MIMAT0000732	FOXRED2	80020	CLASH	23622248	Unspecified
hsa-mir-379-5p	MIMAT0000733	ZYG11B	79699	HITS-CLIP//PAR-CLIP	20371350|23824327	Unspecified
hsa-mir-379-5p	MIMAT0000733	EDEM3	80267	HITS-CLIP	23313552	Unspecified
hsa-mir-380-3p	MIMAT0000735	BRD4	23476	HITS-CLIP	23824327	Unspecified
hsa-mir-380-3p	MIMAT0000735	MIPOL1	145282	HITS-CLIP//PAR-CLIP	23446348|22012620|21572407	Unspecified
hsa-mir-381-3p	MIMAT0000736	POLA2	23649	HITS-CLIP	23824327	Unspecified
hsa-mir-382-5p	MIMAT0000737	G3BP2	9908	HITS-CLIP	19536157	Unspecified
hsa-mir-382-5p	MIMAT0000737	EXOSC2	23404	PAR-CLIP	22100165	Unspecified
hsa-mir-382-5p	MIMAT0000737	ZNF318	24149	HITS-CLIP//PAR-CLIP	23446348|21572407|20371350	Unspecified
hsa-mir-383-5p	MIMAT0000738	DDX21	9188	PAR-CLIP	20371350	Unspecified
hsa-mir-383-5p	MIMAT0000738	CRTC3	64784	HITS-CLIP	23313552	Unspecified
hsa-mir-340-3p	MIMAT0000750	STOM	2040	HITS-CLIP	23313552	Unspecified
hsa-mir-340-3p	MIMAT0000750	FYCO1	79443	PAR-CLIP	21572407	Unspecified
hsa-mir-328-3p	MIMAT0000752	NUP214	8021	CLASH	23622248	Unspecified
hsa-mir-342-3p	MIMAT0000753	DNMT1	1786	Luciferase reporter assay//Microarray//qRT-PCR//Western blot	21565830|27302063	Unspecified
hsa-mir-342-3p	MIMAT0000753	GGCX	2677	HITS-CLIP	23824327	Unspecified
hsa-mir-342-3p	MIMAT0000753	TOMM70	9868	CLASH	23622248	Unspecified
hsa-mir-342-3p	MIMAT0000753	G3BP1	10146	PAR-CLIP	20371350	Unspecified
hsa-mir-342-3p	MIMAT0000753	SLC30A9	10463	CLASH	23622248	Unspecified
hsa-mir-342-3p	MIMAT0000753	ERC1	23085	PAR-CLIP	23592263	Unspecified
hsa-mir-342-3p	MIMAT0000753	TIMM10B	26515	HITS-CLIP	23824327	Unspecified
hsa-mir-337-3p	MIMAT0000754	RNF41	10193	PAR-CLIP	22100165	Unspecified
hsa-mir-323a-3p	MIMAT0000755	CLCC1	23155	PAR-CLIP	22012620	Unspecified
hsa-mir-326	MIMAT0000756	NUP98	4928	HITS-CLIP	19536157	Unspecified
hsa-mir-326	MIMAT0000756	CSDE1	7812	CLASH	23622248	Unspecified
hsa-mir-326	MIMAT0000756	DCAF7	10238	CLASH	23622248	Unspecified
hsa-mir-326	MIMAT0000756	POFUT1	23509	PAR-CLIP	22100165	Unspecified
hsa-mir-151a-3p	MIMAT0000757	FKBP15	23307	PAR-CLIP	22012620	Unspecified
hsa-mir-151a-3p	MIMAT0000757	AATF	26574	CLASH	23622248	Unspecified
hsa-mir-135b-5p	MIMAT0000758	CEP135	9662	HITS-CLIP	23313552	Unspecified
hsa-mir-135b-5p	MIMAT0000758	IL17RA	23765	PAR-CLIP	22100165	Unspecified
hsa-mir-148b-3p	MIMAT0000759	DNMT1	1786	Microarray	17612493	Unspecified
hsa-mir-148b-3p	MIMAT0000759	HMOX1	3162	Microarray	17612493	Unspecified
hsa-mir-148b-3p	MIMAT0000759	NPTX1	4884	PAR-CLIP	20371350	Unspecified
hsa-mir-148b-3p	MIMAT0000759	TOMM70	9868	Microarray	17612493	Unspecified
hsa-mir-148b-3p	MIMAT0000759	MRPS27	23107	PAR-CLIP	23592263	Unspecified
hsa-mir-148b-3p	MIMAT0000759	NIN	51199	Microarray	17612493	Unspecified
hsa-mir-148b-3p	MIMAT0000759	RAB14	51552	PAR-CLIP	23592263	Unspecified
hsa-mir-148b-3p	MIMAT0000759	RTN4	57142	Microarray	17612493	Unspecified
hsa-mir-148b-3p	MIMAT0000759	NOL10	79954	Microarray	17612493	Unspecified
hsa-mir-331-3p	MIMAT0000760	AP2A2	161	CLASH	23622248	Unspecified
hsa-mir-331-3p	MIMAT0000760	GFER	2671	PAR-CLIP	23708386	Unspecified
hsa-mir-331-3p	MIMAT0000760	MARK3	4140	CLASH	23622248	Unspecified
hsa-mir-331-3p	MIMAT0000760	PRKACA	5566	CLASH	23622248	Unspecified
hsa-mir-331-3p	MIMAT0000760	RDX	5962	CLASH	23622248	Unspecified
hsa-mir-331-3p	MIMAT0000760	NUP214	8021	CLASH	23622248	Unspecified
hsa-mir-331-3p	MIMAT0000760	DDX21	9188	CLASH	23622248	Unspecified
hsa-mir-331-3p	MIMAT0000760	ZDHHC5	25921	CLASH	23622248	Unspecified
hsa-mir-331-3p	MIMAT0000760	AAR2	25980	HITS-CLIP	23313552	Unspecified
hsa-mir-331-3p	MIMAT0000760	VPS11	55823	CLASH	23622248	Unspecified
hsa-mir-331-3p	MIMAT0000760	NLRX1	79671	CLASH	23622248	Unspecified
hsa-mir-331-3p	MIMAT0000760	PRRC2B	84726	CLASH	23622248	Unspecified
hsa-mir-331-3p	MIMAT0000760	ZNF503	84858	CLASH	23622248	Unspecified
hsa-mir-331-3p	MIMAT0000760	PIGS	94005	CLASH	23622248	Unspecified
hsa-mir-331-3p	MIMAT0000760	CEP112	201134	CLASH	23622248	Unspecified
hsa-mir-324-5p	MIMAT0000761	SCARB1	949	CLASH	23622248	Unspecified
hsa-mir-324-5p	MIMAT0000761	COL6A1	1291	CLASH	23622248	Unspecified
hsa-mir-324-5p	MIMAT0000761	GNB1	2782	PAR-CLIP	21572407	Unspecified
hsa-mir-324-5p	MIMAT0000761	NSD2	7468	CLASH	23622248	Unspecified
hsa-mir-324-5p	MIMAT0000761	DNAJC11	55735	CLASH	23622248	Unspecified
hsa-mir-324-3p	MIMAT0000762	IMPDH2	3615	CLASH	23622248	Unspecified
hsa-mir-324-3p	MIMAT0000762	RAB7A	7879	CLASH	23622248	Unspecified
hsa-mir-324-3p	MIMAT0000762	G3BP2	9908	PAR-CLIP	21572407	Unspecified
hsa-mir-324-3p	MIMAT0000762	RAB18	22931	CLASH	23622248	Unspecified
hsa-mir-324-3p	MIMAT0000762	NUP62	23636	HITS-CLIP	23824327|19536157	Unspecified
hsa-mir-324-3p	MIMAT0000762	GHITM	27069	PAR-CLIP	20371350	Unspecified
hsa-mir-324-3p	MIMAT0000762	CDK5RAP2	55755	CLASH	23622248	Unspecified
hsa-mir-324-3p	MIMAT0000762	PRRC2B	84726	CLASH	23622248	Unspecified
hsa-mir-324-3p	MIMAT0000762	NEK9	91754	CLASH	23622248	Unspecified
hsa-mir-339-5p	MIMAT0000764	ABCC1	4363	CLASH	23622248	Unspecified
hsa-mir-339-5p	MIMAT0000764	PPT1	5538	CLASH	23622248	Unspecified
hsa-mir-339-5p	MIMAT0000764	PVR	5817	HITS-CLIP	23313552	Unspecified
hsa-mir-339-5p	MIMAT0000764	SRP19	6728	PAR-CLIP	27292025	Unspecified
hsa-mir-339-5p	MIMAT0000764	NSD2	7468	CLASH	23622248	Unspecified
hsa-mir-339-5p	MIMAT0000764	G3BP2	9908	PAR-CLIP	26701625	Unspecified
hsa-mir-339-5p	MIMAT0000764	EXOSC2	23404	HITS-CLIP	23313552	Unspecified
hsa-mir-339-5p	MIMAT0000764	AAR2	25980	CLASH	23622248	Unspecified
hsa-mir-339-5p	MIMAT0000764	CHMP2A	27243	CLASH	23622248	Unspecified
hsa-mir-339-5p	MIMAT0000764	CHPF2	54480	CLASH	23622248	Unspecified
hsa-mir-335-5p	MIMAT0000765	COL6A1	1291	Microarray	18185580	Unspecified
hsa-mir-335-5p	MIMAT0000765	ACSL3	2181	Microarray	18185580	Unspecified
hsa-mir-335-5p	MIMAT0000765	FBN2	2201	Microarray	18185580	Unspecified
hsa-mir-335-5p	MIMAT0000765	GOLGB1	2804	Microarray	18185580	Unspecified
hsa-mir-335-5p	MIMAT0000765	HMOX1	3162	Microarray	18185580	Unspecified
hsa-mir-335-5p	MIMAT0000765	LOX	4015	Microarray	18185580	Unspecified
hsa-mir-335-5p	MIMAT0000765	MFGE8	4240	Microarray	18185580	Unspecified
hsa-mir-335-5p	MIMAT0000765	PLAT	5327	Microarray	18185580	Unspecified
hsa-mir-335-5p	MIMAT0000765	POR	5447	Microarray	18185580	Unspecified
hsa-mir-335-5p	MIMAT0000765	SLC9A3R1	9368	Microarray	18185580	Unspecified
hsa-mir-335-5p	MIMAT0000765	GDF15	9518	Microarray	18185580	Unspecified
hsa-mir-335-5p	MIMAT0000765	TBKBP1	9755	Microarray	18185580	Unspecified
hsa-mir-335-5p	MIMAT0000765	FBLN5	10516	Microarray	18185580	Unspecified
hsa-mir-335-5p	MIMAT0000765	HYOU1	10525	Microarray	18185580	Unspecified
hsa-mir-335-5p	MIMAT0000765	ATE1	11101	Microarray	18185580	Unspecified
hsa-mir-335-5p	MIMAT0000765	NINL	22981	Microarray	18185580	Unspecified
hsa-mir-335-5p	MIMAT0000765	ERC1	23085	Microarray	18185580	Unspecified
hsa-mir-335-5p	MIMAT0000765	NUP210	23225	Microarray	18185580	Unspecified
hsa-mir-335-5p	MIMAT0000765	WASHC4	23325	Microarray	18185580	Unspecified
hsa-mir-335-5p	MIMAT0000765	VPS39	23339	Microarray	18185580	Unspecified
hsa-mir-335-5p	MIMAT0000765	SIRT5	23408	Microarray	18185580	Unspecified
hsa-mir-335-5p	MIMAT0000765	PLD3	23646	Microarray	18185580	Unspecified
hsa-mir-335-5p	MIMAT0000765	SUN2	25777	HITS-CLIP	23824327	Unspecified
hsa-mir-335-5p	MIMAT0000765	HECTD1	25831	Microarray	18185580	Unspecified
hsa-mir-335-5p	MIMAT0000765	HOOK1	51361	Microarray	18185580	Unspecified
hsa-mir-335-5p	MIMAT0000765	FKBP7	51661	Microarray	18185580	Unspecified
hsa-mir-335-5p	MIMAT0000765	ERO1B	56605	Microarray	18185580	Unspecified
hsa-mir-335-5p	MIMAT0000765	DCAKD	79877	Microarray	18185580	Unspecified
hsa-mir-335-5p	MIMAT0000765	ERMP1	79956	Microarray	18185580	Unspecified
hsa-mir-335-5p	MIMAT0000765	FOXRED2	80020	HITS-CLIP	23313552	Unspecified
hsa-mir-335-5p	MIMAT0000765	EDEM3	80267	Microarray	18185580	Unspecified
hsa-mir-335-5p	MIMAT0000765	INHBE	83729	Microarray	18185580	Unspecified
hsa-mir-335-5p	MIMAT0000765	ZNF503	84858	Microarray	18185580	Unspecified
hsa-mir-335-5p	MIMAT0000765	JAKMIP1	152789	Microarray	18185580	Unspecified
hsa-mir-335-5p	MIMAT0000765	TAPT1	202018	Microarray	18185580	Unspecified
hsa-mir-133b	MIMAT0000770	RHOA	387	Immunoblot//Luciferase reporter assay//Microarray//qRT-PCR//Western blot	22179829	Unspecified
hsa-mir-133b	MIMAT0000770	RAB5C	5878	PAR-CLIP	27292025	Unspecified
hsa-mir-133b	MIMAT0000770	NUP214	8021	Immunoblot//Luciferase reporter assay//qRT-PCR	25743594	Unspecified
hsa-mir-133b	MIMAT0000770	PTBP2	58155	Reporter assay	17210790	Unspecified
hsa-mir-133b	MIMAT0000770	ATP13A3	79572	PAR-CLIP	21572407	Unspecified
hsa-mir-133b	MIMAT0000770	DCAKD	79877	PAR-CLIP	22012620	Unspecified
hsa-mir-325	MIMAT0000771	RAB10	10890	PAR-CLIP	21572407	Unspecified
hsa-mir-345-5p	MIMAT0000772	ABCC1	4363	Luciferase reporter assay//Western blot	20099276	Unspecified
hsa-mir-346	MIMAT0000773	PVR	5817	HITS-CLIP	23313552	Unspecified
hsa-mir-346	MIMAT0000773	MAP7D1	55700	PAR-CLIP	23446348|21572407	Unspecified
hsa-mir-384	MIMAT0001075	TBCA	6902	HITS-CLIP	23824327	Unspecified
hsa-mir-384	MIMAT0001075	AAR2	25980	HITS-CLIP	23313552	Unspecified
hsa-mir-196b-5p	MIMAT0001080	PRKACA	5566	CLASH	23622248	Unspecified
hsa-mir-196b-5p	MIMAT0001080	RDX	5962	Immunohistochemistry//Luciferase reporter assay//PAR-CLIP//qRT-PCR//Western blot	24933454|23446348|21572407|26701625	Unspecified
hsa-mir-196b-5p	MIMAT0001080	TLE3	7090	CLASH	23622248	Unspecified
hsa-mir-196b-5p	MIMAT0001080	REEP5	7905	CLASH	23622248	Unspecified
hsa-mir-196b-5p	MIMAT0001080	SLC30A6	55676	HITS-CLIP	23313552	Unspecified
hsa-mir-196b-5p	MIMAT0001080	MEPCE	56257	CLASH	23622248	Unspecified
hsa-mir-422a	MIMAT0001339	DCTPP1	79077	HITS-CLIP	19536157	Unspecified
hsa-mir-423-3p	MIMAT0001340	AP2M1	1173	CLASH	23622248	Unspecified
hsa-mir-423-3p	MIMAT0001340	PSMD8	5714	CLASH	23622248	Unspecified
hsa-mir-423-3p	MIMAT0001340	UPF1	5976	CLASH	23622248	Unspecified
hsa-mir-423-3p	MIMAT0001340	TLE1	7088	CLASH	23622248	Unspecified
hsa-mir-423-3p	MIMAT0001340	NSD2	7468	CLASH	23622248	Unspecified
hsa-mir-423-3p	MIMAT0001340	MOGS	7841	CLASH	23622248	Unspecified
hsa-mir-423-3p	MIMAT0001340	NUP58	9818	CLASH	23622248	Unspecified
hsa-mir-423-3p	MIMAT0001340	NUP210	23225	CLASH	23622248	Unspecified
hsa-mir-423-3p	MIMAT0001340	PABPC1	26986	CLASH//PAR-CLIP	23622248|21572407|20371350|26701625	Unspecified
hsa-mir-423-3p	MIMAT0001340	STOML2	30968	CLASH	23622248	Unspecified
hsa-mir-423-3p	MIMAT0001340	SLC30A6	55676	CLASH	23622248	Unspecified
hsa-mir-423-3p	MIMAT0001340	NAT14	57106	HITS-CLIP	19536157	Unspecified
hsa-mir-423-3p	MIMAT0001340	ZNF503	84858	CLASH	23622248	Unspecified
hsa-mir-424-5p	MIMAT0001341	GNB1	2782	PAR-CLIP	23592263|21572407|20371350	Unspecified
hsa-mir-424-5p	MIMAT0001341	PRKAR2A	5576	PAR-CLIP	23592263|23446348|21572407|20371350	Unspecified
hsa-mir-424-5p	MIMAT0001341	CUL2	8453	ChIP-seq//Luciferase reporter assay//Microarray//qRT-PCR//Western blot	20972335	Unspecified
hsa-mir-424-5p	MIMAT0001341	SBNO1	55206	PAR-CLIP	23446348|21572407|20371350	Unspecified
hsa-mir-424-5p	MIMAT0001341	RTN4	57142	PAR-CLIP	21572407	Unspecified
hsa-mir-424-5p	MIMAT0001341	CLIP4	79745	PAR-CLIP	21572407|20371350	Unspecified
hsa-mir-18b-5p	MIMAT0001412	ARF6	382	PAR-CLIP	20371350	Unspecified
hsa-mir-18b-5p	MIMAT0001412	RAB5C	5878	PAR-CLIP	23592263|23446348|21572407|20371350|26701625	Unspecified
hsa-mir-18b-5p	MIMAT0001412	DCAF7	10238	PAR-CLIP	21572407|20371350	Unspecified
hsa-mir-18b-5p	MIMAT0001412	ZC3H18	124245	CLASH	23622248	Unspecified
hsa-mir-20b-5p	MIMAT0001413	F2RL1	2150	HITS-CLIP	23313552	Unspecified
hsa-mir-20b-5p	MIMAT0001413	GOLGA2	2801	HITS-CLIP	19536157	Unspecified
hsa-mir-20b-5p	MIMAT0001413	ITGB1	3688	PAR-CLIP	20371350	Unspecified
hsa-mir-20b-5p	MIMAT0001413	NUP98	4928	HITS-CLIP	22473208	Unspecified
hsa-mir-20b-5p	MIMAT0001413	PRIM1	5557	HITS-CLIP//PAR-CLIP	23446348|23313552	Unspecified
hsa-mir-20b-5p	MIMAT0001413	PVR	5817	PAR-CLIP	21572407|20371350	Unspecified
hsa-mir-20b-5p	MIMAT0001413	ELOC	6921	HITS-CLIP	23824327	Unspecified
hsa-mir-20b-5p	MIMAT0001413	EIF4H	7458	PAR-CLIP	22012620|21572407|20371350	Unspecified
hsa-mir-20b-5p	MIMAT0001413	NSD2	7468	HITS-CLIP	22473208	Unspecified
hsa-mir-20b-5p	MIMAT0001413	CSDE1	7812	PAR-CLIP	21572407	Unspecified
hsa-mir-20b-5p	MIMAT0001413	REEP5	7905	HITS-CLIP	22473208	Unspecified
hsa-mir-20b-5p	MIMAT0001413	RAB10	10890	PAR-CLIP	21572407|20371350|27292025	Unspecified
hsa-mir-20b-5p	MIMAT0001413	CIT	11113	HITS-CLIP	22473208	Unspecified
hsa-mir-20b-5p	MIMAT0001413	EMC1	23065	PAR-CLIP	22100165	Unspecified
hsa-mir-20b-5p	MIMAT0001413	POFUT1	23509	HITS-CLIP	22473208	Unspecified
hsa-mir-20b-5p	MIMAT0001413	NIN	51199	PAR-CLIP	23592263|21572407	Unspecified
hsa-mir-20b-5p	MIMAT0001413	PDZD11	51248	HITS-CLIP	22473208	Unspecified
hsa-mir-20b-5p	MIMAT0001413	RBM41	55285	HITS-CLIP	23313552	Unspecified
hsa-mir-20b-5p	MIMAT0001413	SMOC1	64093	PAR-CLIP	21572407	Unspecified
hsa-mir-20b-5p	MIMAT0001413	CRTC3	64784	HITS-CLIP	22473208	Unspecified
hsa-mir-20b-5p	MIMAT0001413	C1orf50	79078	HITS-CLIP	23313552	Unspecified
hsa-mir-20b-5p	MIMAT0001413	FYCO1	79443	HITS-CLIP	22473208	Unspecified
hsa-mir-20b-5p	MIMAT0001413	CLIP4	79745	PAR-CLIP	20371350	Unspecified
hsa-mir-20b-5p	MIMAT0001413	FOXRED2	80020	HITS-CLIP	23313552	Unspecified
hsa-mir-20b-5p	MIMAT0001413	PIGO	84720	HITS-CLIP	22473208	Unspecified
hsa-mir-20b-5p	MIMAT0001413	SLC30A7	148867	PAR-CLIP	23592263	Unspecified
hsa-mir-448	MIMAT0001532	ARF6	382	PAR-CLIP	20371350	Unspecified
hsa-mir-448	MIMAT0001532	REEP5	7905	HITS-CLIP	27418678	Unspecified
hsa-mir-448	MIMAT0001532	STC2	8614	PAR-CLIP	27292025	Unspecified
hsa-mir-448	MIMAT0001532	GHITM	27069	PAR-CLIP	20371350	Unspecified
hsa-mir-448	MIMAT0001532	SELENOS	55829	HITS-CLIP//PAR-CLIP	22012620|20371350|24906430|23313552|21572407|26701625|27292025	Unspecified
hsa-mir-429	MIMAT0001536	DNMT1	1786	ChIP-seq//qRT-PCR//Western blot	25595591	Unspecified
hsa-mir-429	MIMAT0001536	ELOC	6921	PAR-CLIP	24398324|26701625|27292025	Unspecified
hsa-mir-429	MIMAT0001536	PABPC1	26986	HITS-CLIP	19536157	Unspecified
hsa-mir-429	MIMAT0001536	TBK1	29110	PAR-CLIP	24398324	Unspecified
hsa-mir-429	MIMAT0001536	ERMP1	79956	PAR-CLIP	22012620	Unspecified
hsa-mir-449a	MIMAT0001541	EDEM3	80267	PAR-CLIP	23592263	Unspecified
hsa-mir-191-3p	MIMAT0001618	LARP4B	23185	HITS-CLIP	23824327	Unspecified
hsa-mir-191-3p	MIMAT0001618	MAP7D1	55700	PAR-CLIP	23446348|21572407	Unspecified
hsa-mir-431-5p	MIMAT0001625	TOMM70	9868	PAR-CLIP	22012620	Unspecified
hsa-mir-431-5p	MIMAT0001625	C1orf50	79078	HITS-CLIP	23824327	Unspecified
hsa-mir-433-3p	MIMAT0001627	RAB5C	5878	PAR-CLIP	27292025	Unspecified
hsa-mir-433-3p	MIMAT0001627	MRPS25	64432	HITS-CLIP	23313552	Unspecified
hsa-mir-433-3p	MIMAT0001627	NEK9	91754	HITS-CLIP	23824327	Unspecified
hsa-mir-329-3p	MIMAT0001629	MARK2	2011	PAR-CLIP	26701625	Unspecified
hsa-mir-329-3p	MIMAT0001629	F2RL1	2150	HITS-CLIP	23313552	Unspecified
hsa-mir-329-3p	MIMAT0001629	RAB1A	5861	PAR-CLIP	20371350	Unspecified
hsa-mir-329-3p	MIMAT0001629	RDX	5962	HITS-CLIP	23824327|23313552|27418678	Unspecified
hsa-mir-329-3p	MIMAT0001629	AGPS	8540	HITS-CLIP//PAR-CLIP	23446348|23824327	Unspecified
hsa-mir-329-3p	MIMAT0001629	ADAM9	8754	HITS-CLIP	23824327	Unspecified
hsa-mir-329-3p	MIMAT0001629	CEP135	9662	HITS-CLIP	23824327|27418678	Unspecified
hsa-mir-329-3p	MIMAT0001629	G3BP1	10146	PAR-CLIP	26701625	Unspecified
hsa-mir-329-3p	MIMAT0001629	MDN1	23195	HITS-CLIP	23824327	Unspecified
hsa-mir-329-3p	MIMAT0001629	BRD4	23476	HITS-CLIP//Luciferase reporter assay//qRT-PCR//Western blot	23824327|26456956	Unspecified
hsa-mir-329-3p	MIMAT0001629	ZDHHC5	25921	HITS-CLIP//PAR-CLIP	23446348|21572407	Unspecified
hsa-mir-329-3p	MIMAT0001629	TIMM10	26519	HITS-CLIP//PAR-CLIP	21572407|27418678	Unspecified
hsa-mir-329-3p	MIMAT0001629	RBM41	55285	HITS-CLIP	19536157	Unspecified
hsa-mir-329-3p	MIMAT0001629	GRIPAP1	56850	HITS-CLIP	23824327	Unspecified
hsa-mir-329-3p	MIMAT0001629	ERGIC1	57222	HITS-CLIP	23824327	Unspecified
hsa-mir-329-3p	MIMAT0001629	DNAJC19	131118	HITS-CLIP	23824327	Unspecified
hsa-mir-329-3p	MIMAT0001629	ARL6IP6	151188	HITS-CLIP	23824327|23313552	Unspecified
[truncated: 7,434 more rows]
