# Supplementary material for: Identification of Novel SARS-CoV-2 Drug Targets by Host MicroRNAs and Transcription Factors Co-regulatory Interaction Network Analysis
Source: Front Genet. 2020 Oct 14;11:571274. doi: 10.3389/fgene.2020.571274 (PMC7591747; doi:10.3389/fgene.2020.571274)
Supplement: TABLE S5 — Gene expression data of SARS-CoV and SARS-CoV-2. [file Table_5.XLSX]

## Sheet: 24hrSARS_GSE17400
Symbol	Name	Host Factor ID	Entrez Gene ID	Public Identifier	Bioset Information Key	Tseng01_Infected_2B4_Expression:SARS CoV | Vehicle Control 24 hours 0.1 MOI Calu-3 cell : Log2 FC	Tseng01_Infected_2B4_Expression:SARS CoV | Vehicle Control 24 hours 0.1 MOI Calu-3 cell : P-Value
AAK1	AP2 associated kinase 1	225522_at	22848	AW628987	1	-0.3	0.044
ABAT	4-aminobutyrate aminotransferase	209459_s_at	18	AF237813	1	-0.6	0.0051
ABAT	4-aminobutyrate aminotransferase	209460_at	18	AF237813	1	-0.5	0.01
ABCB1 /// ABCB4	ATP-binding cassette, sub-family B (MDR/TAP), member 1 /// ATP-binding cassette, sub-family B (MDR/TAP), member 4	209994_s_at	5243 /// 5244	AF016535	1	-0.4	0.019
ABCB10	ATP-binding cassette, sub-family B (MDR/TAP), member 10	223320_s_at	23456	AF277184	1	-0.4	0.042
ABCB9	ATP-binding cassette, sub-family B (MDR/TAP), member 9	207321_s_at	23457	NM_019625	1	-0.5	0.0057
ABCC13	ATP-binding cassette, sub-family C (CFTR/MRP), member 13, pseudogene	1552582_at	150000	NM_172025	1	0.6	0.023
ABHD11	abhydrolase domain containing 11	1552470_a_at	83451	NM_148914	1	-0.6	0.0092
ABI3BP	ABI family, member 3 (NESH) binding protein	223395_at	25890	AB056106	1	-0.6	0.0057
ABL1	ABL proto-oncogene 1, non-receptor tyrosine kinase	202123_s_at	25	NM_005157	1	-0.3	0.044
ABLIM1	actin binding LIM protein 1	200965_s_at	3983	NM_006720	1	-0.4	0.038
ABLIM2	actin binding LIM protein family, member 2	228132_at	84448	AI240129	1	0.4	0.03
AC139100.3	-N/A-	1558845_at	-N/A-	AK097695	1	0.4	0.04
ACAA1	acetyl-CoA acyltransferase 1	214274_s_at	30	AI860341	1	-0.5	0.0089
ACADM	acyl-CoA dehydrogenase, C-4 to C-12 straight chain	202502_at	34	NM_000016	1	-0.3	0.041
ACBD6	acyl-CoA binding domain containing 6	225317_at	84320	AL574669	1	-0.4	0.02
ACD	adrenocortical dysplasia homolog (mouse)	204617_s_at	65057	NM_022914	1	-0.4	0.025
ACE2	angiotensin I converting enzyme 2	219962_at	59272	NM_021804	1	-0.8	0.00037
ACE2	angiotensin I converting enzyme 2	222257_s_at	59272	AK026461	1	-0.6	0.0016
ACER3	alkaline ceramidase 3	222688_at	55331	R12678	1	-0.4	0.029
ACER3	alkaline ceramidase 3	222689_at	55331	N51263	1	-0.5	0.0067
ACO2	aconitase 2, mitochondrial	200793_s_at	50	NM_001098	1	-0.4	0.029
ACOT1 /// ACOT2	acyl-CoA thioesterase 1 /// acyl-CoA thioesterase 2	202982_s_at	10965 /// 641371	NM_006821	1	-0.3	0.044
ACP6	acid phosphatase 6, lysophosphatidic	218795_at	51205	NM_016361	1	-0.4	0.018
ACRC	acidic repeat containing	238825_at	93953	AI091533	1	-0.3	0.038
ACTN2	actinin, alpha 2	203863_at	88	W63731	1	0.6	0.01
ACVR2A	activin A receptor, type IIA	228416_at	92	AI149508	1	-0.5	0.016
ADAM23	ADAM metallopeptidase domain 23	244463_at	8745	AI879064	1	-0.3	0.038
ADAMTS15	ADAM metallopeptidase with thrombospondin type 1 motif, 15	229004_at	170689	AI970797	1	0.3	0.046
ADAMTS2	ADAM metallopeptidase with thrombospondin type 1 motif, 2	226311_at	9509	BF058422	1	0.4	0.047
ADAT1	adenosine deaminase, tRNA-specific 1	219384_s_at	23536	NM_012091	1	-0.5	0.049
ADCY3	adenylate cyclase 3	209321_s_at	109	AF033861	1	-0.3	0.049
ADD1	adducin 1 (alpha)	208030_s_at	118	NM_001119	1	-0.3	0.042
ADIG	adipogenin	1554129_a_at	149685	BC029594	1	0.4	0.016
ADO	2-aminoethanethiol (cysteamine) dioxygenase	212500_at	84890	AL049319	1	-0.3	0.048
AF086126 /// C16ORF52	Homo sapiens full length insert cDNA clone ZA79F02. /// chromosome 16 open reading frame 52	244835_at	730094	AA574132	1	-0.6	0.002
AFF3	AF4/FMR2 family, member 3	1565034_s_at	3899	AF422798	1	0.4	0.028
AGA	aspartylglucosaminidase	204333_s_at	175	NM_000027	1	-0.5	0.0092
AGAP2-AS1	AGAP2 antisense RNA 1	1555907_at	100130776	BQ184856	1	-0.3	0.047
AGBL5	ATP/GTP binding protein-like 5	218480_at	60509	NM_021831	1	-0.4	0.028
AGO4	argonaute RISC catalytic component 4	227930_at	192670	AI669957	1	-0.4	0.026
AGPS	alkylglycerone phosphate synthase	225113_at	8540	BF688144	1	-0.3	0.04
AGTR2	angiotensin II receptor, type 2	207293_s_at	186	U16957	1	0.4	0.045
AHCTF1	AT hook containing transcription factor 1	226115_at	25909	AI138934	1	-0.5	0.0067
AHNAK	AHNAK nucleoprotein	220016_at	79026	NM_024060	1	-0.3	0.033
AHNAK2	AHNAK nucleoprotein 2	212992_at	113146	AI935123	1	-0.5	0.02
AIF1L	allograft inflammatory factor 1-like	223075_s_at	83543	AL136566	1	-0.4	0.04
AJ420595 /// GOPC	Homo sapiens mRNA full length insert cDNA clone EUROIMAGE 704987. /// golgi-associated PDZ and coiled-coil motif containing	236862_at	57120	AA279958	1	-0.4	0.026
AJUBA	ajuba LIM protein	1553764_a_at	84962	NM_032876	1	-0.4	0.022
AK055981	Homo sapiens cDNA FLJ31419 fis, clone NT2NE2000356.	213658_at	-N/A-	BE858194	1	-0.4	0.026
AK057657 /// RP11-473I1.9	Homo sapiens cDNA FLJ33095 fis, clone TRACH2000708. ///	225199_at	-N/A-	AA526970	1	-0.3	0.038
AK3	adenylate kinase 3	224151_s_at	50808	AF183419	1	-0.4	0.034
AK3	adenylate kinase 3	224655_at	50808	AA432267	1	-0.3	0.034
AKAP12	A kinase (PRKA) anchor protein 12	210517_s_at	9590	AB003476	1	-0.4	0.023
AKAP2 /// PALM2-AKAP2	A kinase (PRKA) anchor protein 2 /// PALM2-AKAP2 readthrough	226694_at	11217 /// 445815	BG540494	1	-0.6	0.0064
AKAP7	A kinase (PRKA) anchor protein 7	205771_s_at	9465	AL137063	1	-0.4	0.023
AKAP9	A kinase (PRKA) anchor protein 9	210962_s_at	10142	AB019691	1	-0.4	0.045
AKIP1 /// NUAK2	A kinase (PRKA) interacting protein 1 /// NUAK family, SNF1-like kinase, 2	220987_s_at	56672 /// 81788	NM_030952	1	0.3	0.028
AKR1B10	aldo-keto reductase family 1, member B10 (aldose reductase)	206561_s_at	57016	NM_020299	1	-0.5	0.0076
AKR7A2	aldo-keto reductase family 7, member A2 (aflatoxin aldehyde reductase)	202139_at	8574	NM_003689	1	-0.4	0.024
AKTIP	AKT interacting protein	223894_s_at	64400	BC001134	1	-0.3	0.028
ALCAM	activated leukocyte cell adhesion molecule	1569362_at	214	BC041127	1	-0.4	0.031
ALDH16A1	aldehyde dehydrogenase 16 family, member A1	227592_at	126133	AI674922	1	-0.4	0.028
ALDH1L1	aldehyde dehydrogenase 1 family, member L1	205208_at	10840	NM_012190	1	-0.3	0.03
ALDH1L2	aldehyde dehydrogenase 1 family, member L2	231202_at	160428	AI654224	1	-0.6	0.0051
ALDH3A1	aldehyde dehydrogenase 3 family, member A1	205623_at	218	NM_000691	1	0.4	0.049
ALDH4A1	aldehyde dehydrogenase 4 family, member A1	203722_at	8659	NM_003748	1	-0.4	0.028
ALDH5A1	aldehyde dehydrogenase 5 family, member A1	203608_at	7915	AL031230	1	-0.5	0.011
ALDH6A1	aldehyde dehydrogenase 6 family, member A1	221589_s_at	4329	AW612403	1	-0.4	0.02
ALDH6A1	aldehyde dehydrogenase 6 family, member A1	221590_s_at	4329	AF130089	1	-0.5	0.012
ALDH7A1	aldehyde dehydrogenase 7 family, member A1	208950_s_at	501	BC002515	1	-0.4	0.021
ALDH7A1	aldehyde dehydrogenase 7 family, member A1	208951_at	501	BC002515	1	-0.5	0.02
ALDOB	aldolase B, fructose-bisphosphate	211357_s_at	229	BC005314	1	-0.4	0.039
ALG1 /// NAGPA-AS1	ALG1, chitobiosyldiphosphodolichol beta-mannosyltransferase /// NAGPA antisense RNA 1	236626_at	56052 /// 100507589	AA651954	1	-0.4	0.044
ALG10 /// ALG10B	ALG10, alpha-1,2-glucosyltransferase /// ALG10B, alpha-1,2-glucosyltransferase	228941_at	84920 /// 144245	AW295395	1	-0.6	0.018
ALG10 /// ALG10B	ALG10, alpha-1,2-glucosyltransferase /// ALG10B, alpha-1,2-glucosyltransferase	242900_at	84920 /// 144245	BF244214	1	-0.6	0.0031
ALG14	ALG14, UDP-N-acetylglucosaminyltransferase subunit	1553954_at	199857	BU682208	1	-0.3	0.037
ALG14	ALG14, UDP-N-acetylglucosaminyltransferase subunit	228871_at	199857	AI652839	1	0.4	0.027
ALG9	ALG9, alpha-1,2-mannosyltransferase	228817_at	79796	AI085361	1	-0.4	0.019
ALKBH6	alkB, alkylation repair homolog 6 (E. coli)	225969_at	84964	AW105337	1	-0.4	0.024
ALMS1	Alstrom syndrome 1	214220_s_at	7840	AW003635	1	-0.4	0.048
ALMS1	Alstrom syndrome 1	214221_at	7840	AI825212	1	-0.6	0.011
ALPK1	alpha-kinase 1	227438_at	80216	AI760166	1	-0.3	0.043
ALPL	alkaline phosphatase, liver/bone/kidney	215783_s_at	249	X14174	1	0.3	0.048
ALYREF	Aly/REF export factor	226319_s_at	10189	AF047002	1	-0.5	0.022
ALYREF	Aly/REF export factor	226320_at	10189	AF047002	1	-0.6	0.0093
AMDHD2 /// CEMP1	amidohydrolase domain containing 2 /// cementum protein 1	219082_at	51005 /// 752014	NM_015944	1	-0.4	0.026
AMER2	APC membrane recruitment protein 2	235465_at	219287	N66614	1	0.4	0.029
AMFR	autocrine motility factor receptor, E3 ubiquitin protein ligase	202203_s_at	267	NM_001144	1	-0.6	0.0024
AMFR	autocrine motility factor receptor, E3 ubiquitin protein ligase	202204_s_at	267	AF124145	1	-0.3	0.045
ANAPC10	anaphase promoting complex subunit 10	207845_s_at	10393	NM_014885	1	-0.4	0.05
ANK3	ankyrin 3, node of Ranvier (ankyrin G)	206385_s_at	288	NM_020987	1	-0.3	0.027
ANKRA2	ankyrin repeat, family A (RFXANK-like), 2	218769_s_at	57763	NM_023039	1	-0.4	0.032
ANKRD13A	ankyrin repeat domain 13A	224810_s_at	88455	AL569476	1	-0.4	0.01
ANKRD18A	ankyrin repeat domain 18A	244297_at	253650	AI806762	1	-0.3	0.047
ANKRD44	ankyrin repeat domain 44	228471_at	91526	AA744636	1	-0.5	0.026
ANKRD50	ankyrin repeat domain 50	225731_at	57182	BF196876	1	-0.4	0.022
ANKRD9	ankyrin repeat domain 9	230972_at	122416	AW194999	1	-0.7	0.0077
ANKS1B	ankyrin repeat and sterile alpha motif domain containing 1B	227440_at	56899	AW005572	1	0.4	0.029
ANLN	anillin, actin binding protein	1552619_a_at	54443	NM_018685	1	-0.4	0.027
ANP32A	acidic (leucine-rich) nuclear phosphoprotein 32 family, member A	201038_s_at	8125	T67821	1	-0.6	0.0015
ANP32E	acidic (leucine-rich) nuclear phosphoprotein 32 family, member E	208103_s_at	81611	NM_030920	1	-0.3	0.03
ANP32E	acidic (leucine-rich) nuclear phosphoprotein 32 family, member E	221505_at	81611	AW612574	1	-0.3	0.045
ANPEP	alanyl (membrane) aminopeptidase	202888_s_at	290	NM_001150	1	-0.7	0.00085
ANTXR2	anthrax toxin receptor 2	225524_at	118429	AU152178	1	-0.4	0.022
ANTXR2	anthrax toxin receptor 2	228573_at	118429	BE673665	1	-0.4	0.026
ANTXR2	anthrax toxin receptor 2	238050_at	118429	R94785	1	-0.4	0.043
ANXA11	annexin A11	206200_s_at	311	NM_001157	1	-0.4	0.029
ANXA13	annexin A13	208323_s_at	312	NM_004306	1	-0.3	0.04
AP1G2	adaptor-related protein complex 1, gamma 2 subunit	201613_s_at	8906	BC000519	1	-0.3	0.048
AP3S2 /// C15ORF38-AP3S2	adaptor-related protein complex 3, sigma 2 subunit /// C15orf38-AP3S2 readthrough	213215_at	10239 /// 100526783	AI910895	1	-0.3	0.044
APBA3	amyloid beta (A4) precursor protein-binding, family A, member 3	215148_s_at	9546	AI141541	1	-0.5	0.017
APC	adenomatous polyposis coli	203525_s_at	324	AI375486	1	-0.6	0.016
API5	apoptosis inhibitor 5	233078_at	8539	AK021649	1	-0.4	0.026
APLP2	amyloid beta (A4) precursor-like protein 2	208702_x_at	334	AI525212	1	-0.3	0.035
APOBEC3B	apolipoprotein B mRNA editing enzyme, catalytic polypeptide-like 3B	206632_s_at	9582	NM_004900	1	-0.7	0.0029
APOOL	apolipoprotein O-like	213289_at	139322	BE221922	1	-0.3	0.03
APPBP2	amyloid beta precursor protein (cytoplasmic tail) binding protein 2	202630_at	10513	AA046411	1	-0.4	0.029
ARHGAP18	Rho GTPase activating protein 18	225166_at	93663	AU158022	1	-0.4	0.028
ARHGAP19	Rho GTPase activating protein 19	37577_at	84986	U79256	1	-0.3	0.04
ARHGAP29	Rho GTPase activating protein 29	1558280_s_at	9411	AK092668	1	-0.4	0.02
ARHGAP35	Rho GTPase activating protein 35	229394_s_at	2909	AI275597	1	-0.4	0.024
ARHGAP8 /// PRR5-ARHGAP8	Rho GTPase activating protein 8 /// PRR5-ARHGAP8 readthrough	205980_s_at	23779 /// 553158	NM_015366	1	-0.3	0.044
ARHGAP8 /// PRR5-ARHGAP8	Rho GTPase activating protein 8 /// PRR5-ARHGAP8 readthrough	37117_at	23779 /// 553158	Z83838	1	-0.3	0.039
ARHGEF26	Rho guanine nucleotide exchange factor (GEF) 26	233903_s_at	26084	AK022655	1	-0.5	0.036
ARHGEF28	Rho guanine nucleotide exchange factor (GEF) 28	1554004_a_at	64283	BC012946	1	-0.4	0.034
ARHGEF9	Cdc42 guanine nucleotide exchange factor (GEF) 9	203263_s_at	23229	AI625739	1	-0.5	0.012
ARID1B	AT rich interactive domain 1B (SWI1-like)	238043_at	57492	AI913123	1	-0.4	0.036
ARID4A	AT rich interactive domain 4A (RBP1-like)	230141_at	5926	AI640594	1	-0.4	0.031
ARIH1	ariadne RBR E3 ubiquitin protein ligase 1	1558401_at	25820	AW953994	1	-0.5	0.025
ARIH2	ariadne RBR E3 ubiquitin protein ligase 2	201230_s_at	10425	NM_006321	1	-0.4	0.021
ARL13B	ADP-ribosylation factor-like 13B	228201_at	200894	BE858032	1	-0.4	0.011
ARL17A /// ARL17B /// LOC100294341	ADP-ribosylation factor-like 17A /// ADP-ribosylation factor-like 17B /// ADP-ribosylation factor-like protein 17-like	229028_s_at	51326 /// 100294341 /// 100506084	W73694	1	-0.4	0.026
ARL6IP5	ADP-ribosylation factor-like 6 interacting protein 5	200760_s_at	10550	N92494	1	-0.3	0.048
ARMC8	armadillo repeat containing 8	1555279_at	25852	BC007934	1	-0.6	0.025
ARMC8	armadillo repeat containing 8	1555281_x_at	25852	BC007934	1	-0.8	0.00097
ARMC8	armadillo repeat containing 8	219094_at	25852	NM_014154	1	-0.3	0.048
ARMCX4	armadillo repeat containing, X-linked 4	227444_at	100131755	AW519141	1	0.3	0.047
ARNT	aryl hydrocarbon receptor nuclear translocator	218221_at	405	AL042842	1	-0.4	0.042
ARPIN	actin-related protein 2/3 complex inhibitor	228791_at	348110	BF434655	1	-0.4	0.021
ARRDC3	arrestin domain containing 3	224797_at	57561	AB037797	1	0.5	0.016
ARSB	arylsulfatase B	232197_x_at	411	AW168942	1	-0.9	0.00068
ASB1	ankyrin repeat and SOCS box containing 1	212819_at	51665	AF055024	1	-0.4	0.023
ASB12	ankyrin repeat and SOCS box containing 12	236033_at	142689	AA349954	1	0.6	0.028
ASB16-AS1	ASB16 antisense RNA 1	1555981_at	339201	AK055685	1	-0.4	0.025
ASB4	ankyrin repeat and SOCS box containing 4	217228_s_at	51666	AC003079	1	0.4	0.017
ASB7	ankyrin repeat and SOCS box containing 7	226513_at	140460	AW003222	1	-0.4	0.026
ASF1B	anti-silencing function 1B histone chaperone	218115_at	55723	NM_018154	1	-0.3	0.044
ASMTL	acetylserotonin O-methyltransferase-like	36554_at	8623	Y15521	1	-0.4	0.018
ASMTL-AS1	ASMTL antisense RNA 1	1552872_at	80161	NM_025091	1	0.4	0.025
ASNS	asparagine synthetase (glutamine-hydrolyzing)	205047_s_at	440	NM_001673	1	-0.3	0.05
ASPH	aspartate beta-hydroxylase	210896_s_at	444	AF306765	1	-0.5	0.027
ASPM	asp (abnormal spindle) homolog, microcephaly associated (Drosophila)	219918_s_at	259266	NM_018123	1	-0.7	0.0011
ASPM	asp (abnormal spindle) homolog, microcephaly associated (Drosophila)	232238_at	259266	AK001380	1	-1	0.0051
ASPM	asp (abnormal spindle) homolog, microcephaly associated (Drosophila)	239002_at	259266	AA748494	1	-0.5	0.044
ASRGL1	asparaginase like 1	218857_s_at	80150	NM_025080	1	-0.5	0.012
ASRGL1	asparaginase like 1	222764_at	80150	AI928342	1	-0.6	0.0016
ASXL3	additional sex combs like transcriptional regulator 3	214162_at	80816	AF070541	1	0.4	0.016
ATAD2	ATPase family, AAA domain containing 2	218782_s_at	29028	NM_014109	1	-0.5	0.0062
ATAD2	ATPase family, AAA domain containing 2	222740_at	29028	AI925583	1	-0.5	0.0061
ATAD2	ATPase family, AAA domain containing 2	228401_at	29028	AI656807	1	-0.5	0.011
ATAD2	ATPase family, AAA domain containing 2	235266_at	29028	AI139629	1	-0.5	0.018
ATE1	arginyltransferase 1	225497_at	11101	AL589591	1	-0.4	0.026
ATF2	activating transcription factor 2	212984_at	1386	BE786164	1	-0.4	0.034
ATF3	activating transcription factor 3	1554980_a_at	467	AB066566	1	0.8	0.00052
ATF3	activating transcription factor 3	202672_s_at	467	NM_001674	1	1.4	4.6e-06
ATF6	activating transcription factor 6	226941_at	22926	BF439325	1	-0.3	0.045
ATF6	activating transcription factor 6	231927_at	22926	BF671883	1	-0.4	0.011
ATF7	activating transcription factor 7	228829_at	11016	AI279868	1	-0.4	0.031
ATG13	autophagy related 13	203364_s_at	9776	NM_014741	1	-0.3	0.041
ATG2B	autophagy related 2B	226684_at	55102	AI217906	1	-0.3	0.046
ATL3	atlastin GTPase 3	223453_s_at	25923	BC005096	1	-0.6	0.011
ATM	ATM serine/threonine kinase	212672_at	472	U82828	1	-0.3	0.035
ATP11C	ATPase, class VI, type 11C	226785_at	286410	BF475862	1	-0.4	0.022
ATP2B1	ATPase, Ca++ transporting, plasma membrane 1	212930_at	490	AW576457	1	-0.3	0.042
ATP2B1	ATPase, Ca++ transporting, plasma membrane 1	215716_s_at	490	L14561	1	-0.3	0.045
ATP2C1	ATPase, Ca++ transporting, type 2C, member 1	211137_s_at	27032	AF189723	1	-0.3	0.036
ATP5D	ATP synthase, H+ transporting, mitochondrial F1 complex, delta subunit	213041_s_at	513	BE798517	1	-0.4	0.034
ATP5S	ATP synthase, H+ transporting, mitochondrial Fo complex, subunit s (factor B)	239859_x_at	27109	AW140122	1	-0.6	0.0095
ATP6V1A	ATPase, H+ transporting, lysosomal 70kDa, V1 subunit A	201971_s_at	523	NM_001690	1	-0.4	0.016
ATP6V1C1	ATPase, H+ transporting, lysosomal 42kDa, V1 subunit C1	202874_s_at	528	NM_001695	1	-0.4	0.025
ATP6V1C1	ATPase, H+ transporting, lysosomal 42kDa, V1 subunit C1	226463_at	528	AW241758	1	-0.4	0.041
ATP7B	ATPase, Cu++ transporting, beta polypeptide	204624_at	540	NM_000053	1	-0.4	0.023
ATP8B1	ATPase, aminophospholipid transporter, class I, type 8B, member 1	214594_x_at	5205	BG252666	1	-0.5	0.038
ATP9A	ATPase, class II, type 9A	212062_at	10079	AB014511	1	-0.3	0.046
ATXN1	ataxin 1	203232_s_at	6310	NM_000332	1	-0.3	0.039
ATXN1L	ataxin 1-like	227373_at	342371	AW299653	1	-0.3	0.031
ATXN3	ataxin 3	205415_s_at	4287	AI888099	1	-0.4	0.013
AURKA	aurora kinase A	204092_s_at	6790	NM_003600	1	-0.5	0.012
AURKA	aurora kinase A	208079_s_at	6790	NM_003158	1	-0.3	0.05
AURKB	aurora kinase B	209464_at	9212	AB011446	1	-0.4	0.025
AVL9	AVL9 homolog (S. cerevisiase)	244355_at	23080	AI090310	1	0.5	0.0047
AVPR1A	arginine vasopressin receptor 1A	242680_at	552	AW242409	1	-0.4	0.027
AX747630	Homo sapiens cDNA FLJ35294 fis, clone PROST2008724.	1561817_at	-N/A-	BF681305	1	0.4	0.012
AZGP1	alpha-2-glycoprotein 1, zinc-binding	209309_at	563	D90427	1	-0.3	0.038
AZI2	5-azacytidine induced 2	227905_s_at	64343	BF000175	1	-0.4	0.043
B3GNT7	UDP-GlcNAc:betaGal beta-1,3-N-acetylglucosaminyltransferase 7	1555963_x_at	93010	CA503291	1	-0.4	0.034
B4GALT3	UDP-Gal:betaGlcNAc beta 1,4- galactosyltransferase, polypeptide 3	238312_s_at	8703	BF448185	1	0.3	0.049
BACE2	beta-site APP-cleaving enzyme 2	227051_at	25825	AU157716	1	-0.4	0.043
BACH1	BTB and CNC homology 1, basic leucine zipper transcription factor 1	204194_at	571	NM_001186	1	-0.3	0.027
BAG1	BCL2-associated athanogene	202387_at	573	NM_004323	1	-0.4	0.026
BAG1	BCL2-associated athanogene	229720_at	573	AA394039	1	-0.4	0.025
BAG5	BCL2-associated athanogene 5	202984_s_at	9529	AA457021	1	-0.5	0.013
BAI3	brain-specific angiogenesis inhibitor 3	205638_at	577	NM_001704	1	0.4	0.02
BAX	BCL2-associated X protein	211833_s_at	581	U19599	1	-0.3	0.048
BBIP1	BBSome interacting protein 1	213224_s_at	92482	AK025724	1	-0.3	0.047
BBOX1	butyrobetaine (gamma), 2-oxoglutarate dioxygenase (gamma-butyrobetaine hydroxylase) 1	205363_at	8424	NM_003986	1	0.5	0.0078
BBS1	Bardet-Biedl syndrome 1	229142_s_at	582	AA988322	1	0.3	0.05
BBS2	Bardet-Biedl syndrome 2	223227_at	583	AF342736	1	-0.4	0.024
BBS9	Bardet-Biedl syndrome 9	37549_g_at	27241	U87408	1	-0.4	0.022
BC032026 /// RP11-526I2.1	Homo sapiens cDNA clone IMAGE:4822975. ///	1561035_at	-N/A-	BC032026	1	0.4	0.026
BC038731 /// CTD-2284J15.1	Homo sapiens cDNA clone IMAGE:5267578. ///	1555893_at	-N/A-	AI918054	1	-0.4	0.038
BCAT1	branched chain amino-acid transaminase 1, cytosolic	225285_at	586	AK025615	1	-0.3	0.049
BCAT2	branched chain amino-acid transaminase 2, mitochondrial	203576_at	587	NM_001190	1	-0.4	0.04
BCKDHB	branched chain keto acid dehydrogenase E1, beta polypeptide	210653_s_at	594	M55575	1	-0.3	0.033
BCL3 /// MIR8085	B-cell CLL/lymphoma 3 /// microRNA 8085	204907_s_at	602 /// 102465879	AI829875	1	0.6	0.004
BCL3 /// MIR8085	B-cell CLL/lymphoma 3 /// microRNA 8085	204908_s_at	602 /// 102465879	NM_005178	1	0.5	0.012
BDH2	3-hydroxybutyrate dehydrogenase, type 2	235155_at	56898	AW136198	1	-0.4	0.049
BDP1	B double prime 1, subunit of RNA polymerase III transcription initiation factor IIIB	226290_at	55814	AW051603	1	-0.5	0.016
BECN1	beclin 1, autophagy related	208945_s_at	8678	NM_003766	1	-0.3	0.025
BEX1	brain expressed, X-linked 1	218332_at	55859	NM_018476	1	-0.4	0.021
BEX2	brain expressed X-linked 2	224367_at	84707	AF251053	1	-0.3	0.031
BICD1	bicaudal D homolog 1 (Drosophila)	242228_at	636	AA825721	1	-0.4	0.024
BLVRA	biliverdin reductase A	203771_s_at	644	AA740186	1	-0.4	0.043
BMP10	bone morphogenetic protein 10	208292_at	27302	NM_014482	1	0.4	0.026
BMP15	bone morphogenetic protein 15	221332_at	9210	NM_005448	1	0.4	0.025
BMP2K	BMP2 inducible kinase	59644_at	55589	AI735391	1	-0.4	0.021
BMP8A	bone morphogenetic protein 8a	220204_s_at	353500	NM_024732	1	0.4	0.047
BMPR1B	bone morphogenetic protein receptor, type IB	229975_at	658	AI826437	1	-0.5	0.019
BMS1P20	BMS1 pseudogene 20	224342_x_at	96610	L14452	1	0.4	0.025
BNC2	basonuclin 2	229942_at	54796	AW024890	1	0.4	0.021
BOLA1	bolA family member 1	219345_at	51027	NM_016074	1	-0.3	0.044
BPI /// LOC149684	bactericidal/permeability-increasing protein /// uncharacterized LOC149684	244231_at	671 /// 149684	AW451313	1	0.4	0.02
BPTF	bromodomain PHD finger transcription factor	231953_at	2186	AK027184	1	-0.5	0.017
BRCA1	breast cancer 1, early onset	204531_s_at	672	NM_007295	1	-0.5	0.0031
BRCA2	breast cancer 2, early onset	208368_s_at	675	NM_000059	1	-0.4	0.02
BRCC3	BRCA1/BRCA2-containing complex, subunit 3	216521_s_at	79184	S72931	1	-0.4	0.046
BRCC3	BRCA1/BRCA2-containing complex, subunit 3	231913_s_at	79184	X64643	1	-0.3	0.044
BRD7	bromodomain containing 7	228289_at	29117	AI131537	1	-0.4	0.023
BRD7P3	bromodomain containing 7 pseudogene 3	221093_at	23629	NM_012107	1	0.4	0.034
BRIP1	BRCA1 interacting protein C-terminal helicase 1	235609_at	83990	BF056791	1	-0.5	0.01
BRWD1	bromodomain and WD repeat domain containing 1	225446_at	54014	AI638279	1	-0.5	0.014
BRWD1	bromodomain and WD repeat domain containing 1	231960_at	54014	AA807344	1	-0.4	0.03
BRWD1	bromodomain and WD repeat domain containing 1	238890_at	54014	AI791303	1	-0.4	0.049
BTBD7	BTB (POZ) domain containing 7	220297_at	55727	NM_018167	1	-0.4	0.038
BTC	betacellulin	241412_at	685	AI620677	1	-0.4	0.038
BTG3	BTG family, member 3	213134_x_at	10950	AI765445	1	-0.3	0.043
BUB1	BUB1 mitotic checkpoint serine/threonine kinase	209642_at	699	AF043294	1	-0.5	0.01
BUB1B	BUB1 mitotic checkpoint serine/threonine kinase B	203755_at	701	NM_001211	1	-0.6	0.0019
BUB3	BUB3 mitotic checkpoint protein	201456_s_at	9184	AU160695	1	-0.4	0.034
BUB3	BUB3 mitotic checkpoint protein	201457_x_at	9184	AF081496	1	-0.3	0.044
BUB3	BUB3 mitotic checkpoint protein	201458_s_at	9184	NM_004725	1	-0.5	0.0061
C10ORF32	chromosome 10 open reading frame 32	225334_at	119032	AI147621	1	-0.6	0.004
C10ORF76	chromosome 10 open reading frame 76	55662_at	79591	H27225	1	-0.4	0.023
C10ORF82	chromosome 10 open reading frame 82	231609_at	143379	AW418674	1	0.4	0.024
C10ORF99	chromosome 10 open reading frame 99	227735_s_at	387695	AA553959	1	0.5	0.0097
C11ORF16	chromosome 11 open reading frame 16	220344_at	56673	NM_020643	1	0.4	0.029
C11ORF96	chromosome 11 open reading frame 96	227099_s_at	387763	AW276078	1	0.4	0.0092
C12ORF54	chromosome 12 open reading frame 54	240354_at	121273	BF510008	1	0.4	0.037
C15ORF40	chromosome 15 open reading frame 40	1552310_at	123207	NM_144597	1	-0.4	0.017
C17ORF104	chromosome 17 open reading frame 104	1562484_at	284071	BC041481	1	-0.6	0.018
C17ORF89	chromosome 17 open reading frame 89	225966_at	284184	BF683512	1	0.4	0.024
C1QL1	complement component 1, q subcomponent-like 1	214346_at	10882	AW026646	1	-0.4	0.046
C1RL	complement component 1, r subcomponent-like	218983_at	51279	NM_016546	1	-0.3	0.046
C1ORF111	chromosome 1 open reading frame 111	231163_at	284680	AW139193	1	0.4	0.024
C1ORF43	chromosome 1 open reading frame 43	1555225_at	25912	BC008306	1	-0.7	0.0027
C1ORF53	chromosome 1 open reading frame 53	1558508_a_at	388722	BI832220	1	-0.4	0.041
C1ORF85	chromosome 1 open reading frame 85	1558692_at	112770	AW090182	1	-0.4	0.036
C1ORF86	chromosome 1 open reading frame 86	236584_at	199990	AI681915	1	0.5	0.0078
C20ORF144	chromosome 20 open reading frame 144	231522_at	128864	AA776747	1	0.3	0.031
C22ORF39	chromosome 22 open reading frame 39	1553974_at	128977	BC030758	1	-0.5	0.012
C2CD5	C2 calcium-dependent domain containing 5	212943_at	9847	AB011100	1	-0.3	0.035
C2ORF15	chromosome 2 open reading frame 15	1552740_at	150590	NM_144706	1	-0.4	0.023
C2ORF74 /// KIAA1841	chromosome 2 open reading frame 74 /// KIAA1841	1568658_at	84542 /// 339804	BU069195	1	-0.3	0.046
C3ORF17	chromosome 3 open reading frame 17	225279_s_at	25871	BF691831	1	-0.5	0.03
C3ORF33	chromosome 3 open reading frame 33	1554176_a_at	285315	AF115515	1	-0.6	0.021
C3ORF38	chromosome 3 open reading frame 38	1569129_s_at	285237	BC016013	1	-0.6	0.0027
C3ORF80	chromosome 3 open reading frame 80	236738_at	401097	AW057589	1	-0.5	0.0066
C4ORF46	chromosome 4 open reading frame 46	238015_at	201725	BE620598	1	-0.5	0.0094
C5ORF24	chromosome 5 open reading frame 24	224875_at	134553	BG492488	1	-0.3	0.038
C5ORF51	chromosome 5 open reading frame 51	226159_at	285636	N31982	1	-0.3	0.033
C6ORF89	chromosome 6 open reading frame 89	225729_at	221477	AI870857	1	-0.4	0.024
C7ORF69	chromosome 7 open reading frame 69	221172_at	80099	NM_025031	1	0.4	0.02
C7ORF73	chromosome 7 open reading frame 73	224758_at	647087	BG393032	1	-0.4	0.031
C7ORF73 /// LOC101930655	chromosome 7 open reading frame 73 /// uncharacterized LOC101930655	224751_at	647087 /// 101930655	BE738276	1	-0.7	0.029
C8ORF33	chromosome 8 open reading frame 33	218187_s_at	65265	NM_023080	1	-0.3	0.037
C8ORF88	chromosome 8 open reading frame 88	228107_at	100127983	BF510533	1	-0.4	0.0091
C9ORF117	chromosome 9 open reading frame 117	1557866_at	286207	AK094948	1	0.3	0.041
C9ORF41	chromosome 9 open reading frame 41	228324_at	138199	BF031819	1	-0.3	0.049
C9ORF64	chromosome 9 open reading frame 64	235940_at	84267	AW983691	1	-0.4	0.04
C9ORF91	chromosome 9 open reading frame 91	221865_at	203197	BF969986	1	-0.4	0.026
CA1	carbonic anhydrase I	205949_at	759	M33987	1	0.4	0.039
CA12	carbonic anhydrase XII	204508_s_at	771	BC001012	1	-0.3	0.038
CA2	carbonic anhydrase II	209301_at	760	M36532	1	-0.4	0.0094
CA8	carbonic anhydrase VIII	220234_at	767	NM_004056	1	0.4	0.028
CAB39L	calcium binding protein 39-like	225915_at	81617	AL138875	1	-0.4	0.028
CABLES2	Cdk5 and Abl enzyme substrate 2	226004_at	81928	AI910855	1	-0.3	0.04
CACNA2D1	calcium channel, voltage-dependent, alpha 2/delta subunit 1	227623_at	781	H16409	1	-0.5	0.009
CACNG8	calcium channel, voltage-dependent, gamma subunit 8	234756_at	59283	AF288388	1	0.5	0.031
CACUL1	CDK2-associated, cullin domain 1	225192_at	143384	AA044726	1	-0.3	0.046
CAD	carbamoyl-phosphate synthetase 2, aspartate transcarbamylase, and dihydroorotase	202715_at	790	NM_004341	1	-0.3	0.039
CALCB	calcitonin-related polypeptide beta	214636_at	797	AA747379	1	-0.3	0.044
CALD1	caldesmon 1	201615_x_at	800	AI685060	1	0.4	0.036
CALM1 /// CALM2 /// CALM3	calmodulin 1 (phosphorylase kinase, delta) /// calmodulin 2 (phosphorylase kinase, delta) /// calmodulin 3 (phosphorylase kinase, delta)	211985_s_at	801 /// 805 /// 808	AI653730	1	-0.3	0.038
CALML4	calmodulin-like 4	1568600_at	91860	AA741090	1	-0.4	0.021
CALML4	calmodulin-like 4	64408_s_at	91860	AW025529	1	-0.5	0.01
CAMK4	calcium/calmodulin-dependent protein kinase IV	229029_at	814	AI745230	1	-0.3	0.039
CAMK4	calcium/calmodulin-dependent protein kinase IV	241871_at	814	AL529104	1	-0.5	0.031
CAMKK2	calcium/calmodulin-dependent protein kinase kinase 2, beta	213812_s_at	10645	AK024748	1	-0.4	0.033
CAPRIN1	cell cycle associated protein 1	226990_at	4076	AI798775	1	-0.3	0.038
CARHSP1	calcium regulated heat stable protein 1, 24kDa	224910_at	23589	AL575747	1	-0.4	0.032
CARS	cysteinyl-tRNA synthetase	212971_at	833	AI769685	1	-0.3	0.045
CASC3 /// MIR6866	cancer susceptibility candidate 3 /// microRNA 6866	207842_s_at	22794 /// 102466986	NM_007359	1	-0.3	0.03
CASC5	cancer susceptibility candidate 5	228323_at	57082	BF248364	1	-0.4	0.0097
CASD1	CAS1 domain containing 1	219342_at	64921	NM_022900	1	-0.4	0.021
CASK	calcium/calmodulin-dependent serine protein kinase (MAGUK family)	227156_at	8573	AK025872	1	-0.4	0.034
CASP2	caspase 2, apoptosis-related cysteine peptidase	208050_s_at	835	NM_001224	1	-0.5	0.026
CASP2	caspase 2, apoptosis-related cysteine peptidase	209811_at	835	BC002427	1	-0.5	0.012
CASP2	caspase 2, apoptosis-related cysteine peptidase	226032_at	835	AU153405	1	-0.4	0.013
CASP2	caspase 2, apoptosis-related cysteine peptidase	34449_at	835	U13022	1	-0.5	0.027
CASP8AP2	caspase 8 associated protein 2	222201_s_at	9994	AB037736	1	-0.5	0.013
CAV2	caveolin 2	203323_at	858	BF197655	1	-0.4	0.026
CBFB	core-binding factor, beta subunit	206788_s_at	865	AF294326	1	-0.4	0.03
CBR4	carbonyl reductase 4	213626_at	84869	AL049442	1	-0.4	0.04
CBS	cystathionine-beta-synthase	1553972_a_at	875	BC007257	1	-0.3	0.029
CBS	cystathionine-beta-synthase	212816_s_at	875	BE613178	1	-0.4	0.021
CBX1	chromobox homolog 1	201518_at	10951	NM_006807	1	-0.3	0.046
CBX3	chromobox homolog 3	1555920_at	11335	BU683892	1	-0.6	0.0094
CBX5	chromobox homolog 5	234990_at	23468	BE777970	1	-0.4	0.046
CC2D1A	coiled-coil and C2 domain containing 1A	58994_at	54862	AI689402	1	-0.3	0.046
CCDC106	coiled-coil domain containing 106	207006_s_at	29903	NM_013301	1	-0.6	0.011
CCDC115	coiled-coil domain containing 115	224946_s_at	84317	AL571677	1	-0.3	0.026
CCDC134	coiled-coil domain containing 134	235434_at	79879	AI984541	1	-0.3	0.046
CCDC15	coiled-coil domain containing 15	241360_at	80071	BG413368	1	-0.4	0.037
CCDC152	coiled-coil domain containing 152	242519_at	100129792	BF432331	1	-0.5	0.015
CCDC18	coiled-coil domain containing 18	232362_at	343099	AL139421	1	-0.3	0.043
CCDC25	coiled-coil domain containing 25	222525_s_at	55246	AU160632	1	-0.4	0.016
CCDC28A	coiled-coil domain containing 28A	209479_at	25901	BC000758	1	-0.4	0.022
CCDC34	coiled-coil domain containing 34	226287_at	91057	AI458313	1	-0.4	0.03
CCDC42B	coiled-coil domain containing 42B	226539_s_at	387885	BF436337	1	-0.5	0.03
CCDC43	coiled-coil domain containing 43	225607_at	124808	AI948491	1	-0.3	0.037
CCDC47	coiled-coil domain containing 47	217814_at	57003	NM_020198	1	-0.4	0.038
CCDC65	coiled-coil domain containing 65	1561523_at	85478	AV656810	1	-0.3	0.046
CCDC68	coiled-coil domain containing 68	220180_at	80323	NM_025214	1	-0.3	0.031
CCDC77	coiled-coil domain containing 77	224521_s_at	84318	BC006444	1	-0.4	0.026
CCDC88A	coiled-coil domain containing 88A	225045_at	55704	AB033038	1	-0.6	0.0061
CCDC91	coiled-coil domain containing 91	1570571_at	55297	BC035168	1	-0.4	0.048
CCHCR1	coiled-coil alpha-helical rod protein 1	42361_g_at	54535	AI588986	1	-0.4	0.034
CCL20	chemokine (C-C motif) ligand 20	205476_at	6364	NM_004591	1	1.1	0.00068
CCL27	chemokine (C-C motif) ligand 27	207955_at	10850	NM_006664	1	0.5	0.024
CCNB1	cyclin B1	228729_at	891	N90191	1	-0.5	0.032
CCNB2	cyclin B2	202705_at	9133	NM_004701	1	-0.4	0.038
CCNF	cyclin F	204827_s_at	899	U17105	1	-0.6	0.024
CCNG2	cyclin G2	202769_at	901	AW134535	1	-0.6	0.0049
CCNG2	cyclin G2	202770_s_at	901	NM_004354	1	-0.4	0.014
CCNYL1	cyclin Y-like 1	227280_s_at	151195	AK026922	1	-0.3	0.049
CCSAP	centriole, cilia and spindle-associated protein	225904_at	126731	N64686	1	-0.4	0.012
CD109	CD109 molecule	226545_at	135228	AL110152	1	-0.4	0.048
CD163L1	CD163 molecule-like 1	223655_at	283316	AF264014	1	0.4	0.02
CD1A	CD1a molecule	210325_at	909	M28825	1	0.4	0.037
CD1B	CD1b molecule	206749_at	910	NM_001764	1	0.4	0.035
CD302 /// LY75 /// LY75-CD302	CD302 molecule /// lymphocyte antigen 75 /// LY75-CD302 readthrough	203799_at	4065 /// 9936 /// 100526664	NM_014880	1	-0.4	0.014
CD47	CD47 molecule	226016_at	961	AL118798	1	-0.4	0.022
CD69	CD69 molecule	209795_at	969	L07555	1	0.5	0.01
CD84	CD84 molecule	211192_s_at	8832	AF054818	1	0.3	0.045
CD97	CD97 molecule	202910_s_at	976	NM_001784	1	-0.4	0.018
CDC14B	cell division cycle 14B	208022_s_at	8555	NM_003671	1	-0.5	0.0076
CDC16	cell division cycle 16	202717_s_at	8881	NM_003903	1	-0.6	0.004
CDC20	cell division cycle 20	202870_s_at	991	NM_001255	1	-0.5	0.011
CDC23	cell division cycle 23	223651_x_at	8697	BC005258	1	-0.4	0.036
CDC25B	cell division cycle 25B	201853_s_at	994	NM_021873	1	-0.3	0.04
CDC25C	cell division cycle 25C	205167_s_at	995	NM_001790	1	-0.5	0.0099
CDC40	cell division cycle 40	203376_at	51362	BG528818	1	-0.3	0.04
CDC7	cell division cycle 7	204510_at	8317	NM_003503	1	-0.5	0.013
CDCA2	cell division cycle associated 2	226661_at	157313	T90295	1	-0.5	0.0092
CDCA3	cell division cycle associated 3	223307_at	83461	BC002551	1	-0.4	0.024
CDCA5	cell division cycle associated 5	224753_at	113130	BE614410	1	-0.4	0.016
CDCA7L	cell division cycle associated 7-like	225081_s_at	55536	AK022955	1	-0.6	0.0055
CDCA8	cell division cycle associated 8	221520_s_at	55143	BC001651	1	-0.3	0.029
CDH11	cadherin 11, type 2, OB-cadherin (osteoblast)	207173_x_at	1009	D21254	1	0.4	0.039
CDH19	cadherin 19, type 2	235639_at	28513	AL137939	1	0.4	0.031
CDHR5	cadherin-related family member 5	220075_s_at	53841	NM_017717	1	0.6	0.0031
CDK1	cyclin-dependent kinase 1	203213_at	983	AL524035	1	-0.5	0.01
CDK10	cyclin-dependent kinase 10	210622_x_at	8558	AF153430	1	-0.3	0.045
CDK13	cyclin-dependent kinase 13	232266_x_at	8621	AK024379	1	-0.4	0.03
CDK15	cyclin-dependent kinase 15	1552559_a_at	65061	NM_139158	1	0.3	0.043
CDK2	cyclin-dependent kinase 2	204252_at	1017	M68520	1	-0.4	0.024
CDK2	cyclin-dependent kinase 2	211804_s_at	1017	AB012305	1	-0.4	0.028
CDK5RAP2	CDK5 regulatory subunit associated protein 2	233540_s_at	55755	AK025867	1	-0.5	0.0092
CDT1	chromatin licensing and DNA replication factor 1	209832_s_at	81620	AF321125	1	-0.5	0.011
CEACAM7	carcinoembryonic antigen-related cell adhesion molecule 7	206198_s_at	1087	L31792	1	-0.5	0.0082
CEACAM7	carcinoembryonic antigen-related cell adhesion molecule 7	206199_at	1087	NM_006890	1	-0.5	0.0094
CEBPG	CCAAT/enhancer binding protein (C/EBP), gamma	204203_at	1054	NM_001806	1	-0.3	0.04
CELF1	CUGBP, Elav-like family member 1	209489_at	10658	N25915	1	-0.3	0.047
CELSR1	cadherin, EGF LAG seven-pass G-type receptor 1	217262_s_at	9620	BC000059	1	-0.4	0.037
CENPBD1P1	CENPBD1 pseudogene 1	230528_s_at	65996	AI651726	1	-0.5	0.012
CENPC	centromere protein C	204739_at	1060	NM_001812	1	-0.5	0.01
CENPF	centromere protein F, 350/400kDa	207828_s_at	1063	NM_005196	1	-0.5	0.012
CENPF	centromere protein F, 350/400kDa	209172_s_at	1063	U30872	1	-1	7.8e-05
CENPH	centromere protein H	231772_x_at	64946	AL572471	1	-0.4	0.04
CENPM	centromere protein M	218741_at	79019	NM_024053	1	-0.4	0.046
CENPN	centromere protein N	219555_s_at	55839	NM_018455	1	-0.3	0.034
CENPN	centromere protein N	222118_at	55839	AK023669	1	-0.5	0.011
CENPO	centromere protein O	226118_at	79172	BE326728	1	-0.4	0.03
CENPU	centromere protein U	218883_s_at	79682	NM_024629	1	-0.4	0.024
CENPU	centromere protein U	229305_at	79682	AA460299	1	-0.7	0.0017
CENPW	centromere protein W	226936_at	387103	BG492359	1	-0.4	0.026
CEP104	centrosomal protein 104kDa	204075_s_at	9731	NM_014704	1	-0.4	0.018
CEP120	centrosomal protein 120kDa	226449_at	153241	AI392933	1	-0.4	0.029
CEP128	centrosomal protein 128kDa	244033_at	145508	AI937080	1	-0.3	0.049
CEP55	centrosomal protein 55kDa	218542_at	55165	NM_018131	1	-0.5	0.0091
CEP68	centrosomal protein 68kDa	212675_s_at	23177	AB011154	1	-0.4	0.016
CEP76	centrosomal protein 76kDa	52285_f_at	79959	AW002970	1	-0.4	0.049
CEP78	centrosomal protein 78kDa	235919_at	84131	AA227879	1	-0.7	0.0076
CEP89	centrosomal protein 89kDa	1554513_s_at	84902	BC032307	1	-0.4	0.017
CES2	carboxylesterase 2	209667_at	8824	BF033242	1	-0.4	0.027
CFB	complement factor B	202357_s_at	629	NM_001710	1	-0.3	0.036
CFC1 /// CFC1B	cripto, FRL-1, cryptic family 1 /// cripto, FRL-1, cryptic family 1B	223753_s_at	55997 /// 653275	AF312769	1	0.5	0.012
CFI	complement factor I	1555564_a_at	3426	BC020718	1	-0.5	0.0044
CFI	complement factor I	203854_at	3426	NM_000204	1	-0.5	0.014
CFLAR	CASP8 and FADD-like apoptosis regulator	210564_x_at	8837	AF009619	1	-0.3	0.049
CFTR	cystic fibrosis transmembrane conductance regulator (ATP-binding cassette sub-family C, member 7)	215702_s_at	1080	W60595	1	-0.3	0.033
CGNL1 /// LOC101930344 /// LOC101930349	cingulin-like 1 /// uncharacterized LOC101930344 /// uncharacterized LOC101930349	225817_at	84952 /// 101930344 /// 101930349	AB051536	1	-0.5	0.015
CHCHD4	coiled-coil-helix-coiled-coil-helix domain containing 4	229595_at	131474	AI493303	1	-0.4	0.025
CHCHD7	coiled-coil-helix-coiled-coil-helix domain containing 7	218642_s_at	79145	NM_024300	1	-0.4	0.026
CHD6	chromodomain helicase DNA binding protein 6	225026_at	84181	BF572029	1	-0.3	0.042
CHEK1	checkpoint kinase 1	205393_s_at	1111	NM_001274	1	-0.4	0.019
CHERP	calcium homeostasis endoplasmic reticulum protein	202230_s_at	10523	NM_006387	1	-0.3	0.043
CHML	choroideremia-like (Rab escort protein 2)	1565951_s_at	1122	AJ293392	1	-0.4	0.026
CHML	choroideremia-like (Rab escort protein 2)	226350_at	1122	AU155565	1	-0.7	0.0073
CHMP1B	charged multivesicular body protein 1B	218177_at	57132	AA293502	1	-0.5	0.026
CHMP4A /// TM9SF1	charged multivesicular body protein 4A /// transmembrane 9 superfamily member 1	218572_at	10548 /// 29082	NM_014169	1	-0.4	0.038
CHRAC1	chromatin accessibility complex 1	231764_at	54108	AK023537	1	-0.4	0.014
CHRNB4	cholinergic receptor, nicotinic, beta 4 (neuronal)	207516_at	1143	NM_000750	1	0.3	0.04
CHST11	carbohydrate (chondroitin 4) sulfotransferase 11	226372_at	50515	AI123348	1	0.4	0.036
CHURC1	churchill domain containing 1	223210_at	91612	AF060510	1	-0.4	0.047
CIPC	CLOCK-interacting pacemaker	225623_at	85457	AI621225	1	-0.5	0.028
CIRBP	cold inducible RNA binding protein	200810_s_at	1153	NM_001280	1	-0.7	0.0011
CIRBP	cold inducible RNA binding protein	200811_at	1153	NM_001280	1	-0.5	0.006
CIT /// MIR1178	citron rho-interacting serine/threonine kinase /// microRNA 1178	212801_at	11113 /// 100302274	AI861788	1	-0.6	0.004
CIZ1	CDKN1A interacting zinc finger protein 1	211358_s_at	25792	AF234161	1	-0.3	0.027
CKAP2L	cytoskeleton associated protein 2-like	229610_at	150468	AW088063	1	-0.3	0.045
CLASP2	cytoplasmic linker associated protein 2	212308_at	23122	AL137636	1	-0.3	0.039
CLCA1	chloride channel accessory 1	210107_at	1179	AF127036	1	0.3	0.039
CLCC1	chloride channel CLIC-like 1	207855_s_at	23155	NM_015127	1	-0.6	0.0025
CLCN5	chloride channel, voltage-sensitive 5	226274_at	1184	AK025562	1	-0.3	0.045
CLDN18	claudin 18	221132_at	51208	NM_016369	1	0.4	0.026
CLDN22 /// WWC2	claudin 22 /// WW and C2 domain containing 2	218775_s_at	53842 /// 80014	NM_024949	1	-0.4	0.029
CLEC7A	C-type lectin domain family 7, member A	1555756_a_at	64581	AF400600	1	0.5	0.039
CLEC7A	C-type lectin domain family 7, member A	221698_s_at	64581	AF313468	1	0.4	0.035
CLN6	ceroid-lipofuscinosis, neuronal 6, late infantile, variant	218161_s_at	54982	NM_017882	1	-0.4	0.034
CLN8	ceroid-lipofuscinosis, neuronal 8 (epilepsy, progressive with mental retardation)	229958_at	2055	W93695	1	-0.4	0.043
CLPX	caseinolytic mitochondrial matrix peptidase chaperone subunit	204809_at	10845	NM_006660	1	-0.4	0.028
CLSPN	claspin	1553120_at	63967	NM_022111	1	-0.3	0.049
CLSPN	claspin	243840_at	63967	BF691634	1	-0.4	0.016
CLTA	clathrin, light chain A	216293_at	1211	X81636	1	0.3	0.043
CMAS	cytidine monophosphate N-acetylneuraminic acid synthetase	218111_s_at	55907	NM_018686	1	-0.5	0.012
CNGA3	cyclic nucleotide gated channel alpha 3	207261_at	1261	NM_001298	1	0.4	0.023
CNN1	calponin 1, basic, smooth muscle	203951_at	1264	NM_001299	1	0.4	0.03
CNOT10	CCR4-NOT transcription complex, subunit 10	223219_s_at	25904	BC002931	1	-0.3	0.046
CNTLN	centlein, centrosomal protein	1559005_s_at	54875	AK098502	1	-0.6	0.024
CNTLN	centlein, centrosomal protein	239989_at	54875	AW170610	1	-0.4	0.026
COBLL1	cordon-bleu WH2 repeat protein-like 1	203642_s_at	22837	NM_014900	1	-0.4	0.012
COCH	cochlin	1554241_at	1690	BC007230	1	-0.3	0.045
COCH	cochlin	205229_s_at	1690	AA669336	1	-0.4	0.019
COL18A1	collagen, type XVIII, alpha 1	209081_s_at	80781	NM_030582	1	-0.4	0.03
COL26A1	collagen, type XXVI, alpha 1	233894_x_at	136227	T08756	1	0.4	0.045
COL4A4	collagen, type IV, alpha 4	229779_at	1286	BF476080	1	-0.4	0.038
COL4A5	collagen, type IV, alpha 5	213110_s_at	1287	AW052179	1	-0.4	0.031
COLGALT2	collagen beta(1-O)galactosyltransferase 2	209883_at	23127	AF288389	1	-0.5	0.016
COMMD2	COMM domain containing 2	223491_at	51122	BC001228	1	-0.5	0.027
COPA	coatomer protein complex, subunit alpha	214336_s_at	1314	AI621079	1	-0.4	0.026
COPRS	coordinator of PRMT5, differentiation stimulator	225096_at	55352	AJ272196	1	-0.3	0.03
COPS6	COP9 signalosome subunit 6	201405_s_at	10980	NM_006833	1	-0.4	0.041
COQ2	coenzyme Q2 4-hydroxybenzoate polyprenyltransferase	213379_at	27235	AF091086	1	-0.3	0.041
COTL1	coactosin-like F-actin binding protein 1	221059_s_at	23406	NM_021615	1	-0.4	0.028
COTL1	coactosin-like F-actin binding protein 1	224583_at	23406	AL565621	1	-0.4	0.032
COX11	cytochrome c oxidase assembly homolog 11 (yeast)	211727_s_at	1353	BC005895	1	-0.3	0.038
COX15	cytochrome c oxidase assembly homolog 15 (yeast)	221550_at	1355	BC002382	1	-0.3	0.035
COX7B	cytochrome c oxidase subunit VIIb	239252_at	1349	AA911561	1	-0.4	0.021
CPD	carboxypeptidase D	201940_at	1362	AA897514	1	-0.3	0.037
CPEB2	cytoplasmic polyadenylation element binding protein 2	235479_at	132864	AI948598	1	0.3	0.041
CPM	carboxypeptidase M	241765_at	1368	AI469884	1	-0.5	0.022
CPNE2	copine II	225129_at	221184	AW170571	1	-0.3	0.048
CPSF1 /// MIR1234 /// MIR6849 /// MIR939	cleavage and polyadenylation specific factor 1, 160kDa /// microRNA 1234 /// microRNA 6849 /// microRNA 939	201639_s_at	29894 /// 100126351 /// 100302196 /// 102466749	NM_013291	1	-0.3	0.049
CPSF2	cleavage and polyadenylation specific factor 2, 100kDa	225994_at	53981	AK023583	1	-0.4	0.025
CPSF2	cleavage and polyadenylation specific factor 2, 100kDa	233208_x_at	53981	AA583986	1	-0.4	0.026
CPSF3L	cleavage and polyadenylation specific factor 3-like	224312_x_at	54973	BC000675	1	-0.4	0.029
CPSF3L /// MIR6727	cleavage and polyadenylation specific factor 3-like /// microRNA 6727	217994_x_at	54973 /// 102465435	NM_017871	1	-0.3	0.034
CPSF3L /// MIR6727	cleavage and polyadenylation specific factor 3-like /// microRNA 6727	233625_x_at	54973 /// 102465435	AK021939	1	-0.3	0.039
CPSF6	cleavage and polyadenylation specific factor 6, 68kDa	202469_s_at	11052	AU149367	1	-0.3	0.049
CPSF6	cleavage and polyadenylation specific factor 6, 68kDa	226934_at	11052	AU149663	1	-0.7	0.016
CPT1A	carnitine palmitoyltransferase 1A (liver)	203634_s_at	1374	NM_001876	1	-0.5	0.032
CRCP	CGRP receptor component	203898_at	27297	AU154853	1	-0.4	0.035
CREB5 /// LOC401317	cAMP responsive element binding protein 5 /// uncharacterized LOC401317	205931_s_at	9586 /// 401317	NM_004904	1	0.8	0.0016
CREBRF	CREB3 regulatory factor	238476_at	153222	AA481560	1	-0.3	0.044
CRIP2	cysteine-rich protein 2	208978_at	1397	U36190	1	-0.4	0.039
CRIPT	cysteine-rich PDZ-binding protein	239050_s_at	9419	BF514509	1	-0.3	0.03
CRISP3	cysteine-rich secretory protein 3	207802_at	10321	NM_006061	1	-0.4	0.023
CRNDE	colorectal neoplasia differentially expressed (non-protein coding)	238021_s_at	643911	AA954994	1	-0.4	0.022
CROCC	ciliary rootlet coiled-coil, rootletin	216419_at	9696	AK026910	1	0.5	0.01
CROCCP2	ciliary rootlet coiled-coil, rootletin pseudogene 2	211038_s_at	84809	BC006312	1	-0.4	0.023
CRTAP	cartilage associated protein	1554464_a_at	10491	BC008745	1	-0.6	0.034
CRY1	cryptochrome circadian clock 1	209674_at	1407	D83702	1	-0.4	0.029
CRYGN	crystallin, gamma N	1553082_at	155051	NM_144727	1	0.3	0.05
CSDE1	cold shock domain containing E1, RNA-binding	202646_s_at	7812	AA167775	1	-0.3	0.044
CSE1L	CSE1 chromosome segregation 1-like (yeast)	201111_at	1434	AF053641	1	-0.3	0.037
CSE1L	CSE1 chromosome segregation 1-like (yeast)	210766_s_at	1434	AF053640	1	-0.4	0.02
CSGALNACT2	chondroitin sulfate N-acetylgalactosaminyltransferase 2	222235_s_at	55454	AL139812	1	-0.5	0.012
CSMD3	CUB and Sushi multiple domains 3	240228_at	114788	AI187364	1	0.4	0.049
CSPG5	chondroitin sulfate proteoglycan 5 (neuroglycan C)	39966_at	10675	AF059274	1	-0.5	0.0092
CSPP1	centrosome and spindle pole associated protein 1	227105_at	79848	AI400587	1	-0.3	0.046
CSRNP1	cysteine-serine-rich nuclear protein 1	225557_at	64651	AI091372	1	0.5	0.011
CTB-102L5.7	-N/A-	210922_at	-N/A-	BC000772	1	0.4	0.046
CTBP1	C-terminal binding protein 1	203392_s_at	1487	NM_001328	1	-0.5	0.018
CTBP1	C-terminal binding protein 1	212863_x_at	1487	BF337195	1	-0.3	0.048
CTBP1	C-terminal binding protein 1	213980_s_at	1487	AA053830	1	-0.3	0.05
CTBP2	C-terminal binding protein 2	201219_at	1488	AW269836	1	-0.3	0.035
CTD-2292M16.8	-N/A-	1558605_at	-N/A-	BC040287	1	-0.6	0.017
CTD-2528L19.6	-N/A-	235304_at	-N/A-	AI400209	1	-0.5	0.0067
CTH	cystathionine gamma-lyase	206085_s_at	1491	NM_001902	1	-0.4	0.03
CTIF	CBP80/20-dependent translation initiation factor	204303_s_at	9811	NM_014772	1	-0.3	0.047
CTNNB1	catenin (cadherin-associated protein), beta 1, 88kDa	201533_at	1499	NM_001904	1	-0.3	0.045
CTSB	cathepsin B	227961_at	1508	AA130998	1	-0.5	0.022
CTTNBP2NL	CTTNBP2 N-terminal like	226000_at	55917	AI423056	1	-0.3	0.026
CUBN	cubilin (intrinsic factor-cobalamin receptor)	206775_at	8029	NM_001081	1	0.3	0.049
CUL2	cullin 2	203078_at	8453	U83410	1	-0.5	0.015
CUL4A	cullin 4A	201424_s_at	8451	NM_003589	1	-0.4	0.023
CUL5	cullin 5	203531_at	8065	BF435809	1	-0.4	0.019
CXCL1	chemokine (C-X-C motif) ligand 1 (melanoma growth stimulating activity, alpha)	204470_at	2919	NM_001511	1	0.3	0.035
CXCL2	chemokine (C-X-C motif) ligand 2	209774_x_at	2920	M57731	1	0.5	0.0061
CXCL3	chemokine (C-X-C motif) ligand 3	207850_at	2921	NM_002090	1	0.5	0.021
CXCL8	chemokine (C-X-C motif) ligand 8	202859_x_at	3576	NM_000584	1	1.1	5.9e-06
CXCL8	chemokine (C-X-C motif) ligand 8	211506_s_at	3576	AF043337	1	1.1	2.8e-05
CXXC5	CXXC finger protein 5	224516_s_at	51523	BC006428	1	-0.4	0.028
CXORF57	chromosome X open reading frame 57	219355_at	55086	NM_018015	1	-0.3	0.041
CYCS	cytochrome c, somatic	244546_at	54205	AI760495	1	-0.6	0.0049
CYP19A1	cytochrome P450, family 19, subfamily A, polypeptide 1	239459_s_at	1588	BF988443	1	0.5	0.011
CYP2A7P1	cytochrome P450, family 2, subfamily A, polypeptide 7 pseudogene 1	216340_s_at	1550	U22044	1	0.3	0.04
CYP2B6	cytochrome P450, family 2, subfamily B, polypeptide 6	206755_at	1555	NM_000767	1	-0.4	0.01
CYP2B6 /// CYP2B7P	cytochrome P450, family 2, subfamily B, polypeptide 6 /// cytochrome P450, family 2, subfamily B, polypeptide 7, pseudogene	206754_s_at	1555 /// 1556	NM_000767	1	-0.6	0.0022
CYP2C18	cytochrome P450, family 2, subfamily C, polypeptide 18	215103_at	1562	AW192911	1	-0.3	0.039
CYS1	cystin 1	228739_at	192668	AI139413	1	-0.8	0.00048
CYTL1	cytokine-like 1	219837_s_at	54360	NM_018659	1	0.3	0.048
CYYR1	cysteine/tyrosine-rich 1	235044_at	116159	H06649	1	0.4	0.036
DAAM1	dishevelled associated activator of morphogenesis 1	216060_s_at	23002	AK021890	1	-0.4	0.026
DAB2	Dab, mitogen-responsive phosphoprotein, homolog 2 (Drosophila)	232898_at	1601	R79120	1	0.4	0.021
DAZAP1	DAZ associated protein 1	218443_s_at	26528	NM_018959	1	-0.4	0.022
DAZAP1	DAZ associated protein 1	226620_x_at	26528	AI951998	1	-0.3	0.038
DAZAP1	DAZ associated protein 1	229813_x_at	26528	BF512907	1	-0.4	0.02
DBT	dihydrolipoamide branched chain transacylase E2	231919_at	1629	AK024946	1	-0.3	0.038
DCAF16	DDB1 and CUL4 associated factor 16	219717_at	54876	NM_017741	1	-0.4	0.048
DCAF16	DDB1 and CUL4 associated factor 16	228106_at	54876	AA031528	1	-0.8	0.0016
DCAF17	DDB1 and CUL4 associated factor 17	231921_at	80067	AK021599	1	-0.4	0.045
DCAKD	dephospho-CoA kinase domain containing	224522_s_at	79877	BC006472	1	-0.3	0.033
DCDC2	doublecortin domain containing 2	222925_at	51473	AW444617	1	-0.3	0.046
DCK	deoxycytidine kinase	203302_at	1633	NM_000788	1	-0.4	0.033
DCPS	decapping enzyme, scavenger	218774_at	28960	NM_014026	1	-0.4	0.016
DCTD	dCMP deaminase	201571_s_at	1635	AI656493	1	-0.3	0.044
DCTD	dCMP deaminase	201572_x_at	1635	NM_001921	1	-0.5	0.0079
DCTD	dCMP deaminase	210137_s_at	1635	BC001286	1	-0.6	0.0056
DCTN4	dynactin 4 (p62)	222488_s_at	51164	BE218028	1	-0.3	0.05
DCTN4	dynactin 4 (p62)	233490_at	51164	AI985890	1	-0.3	0.05
DCUN1D1	DCN1, defective in cullin neddylation 1, domain containing 1	240781_x_at	54165	H18004	1	-0.5	0.012
DDC	dopa decarboxylase (aromatic L-amino acid decarboxylase)	205311_at	1644	NM_000790	1	-0.3	0.027
DDHD2	DDHD domain containing 2	212690_at	23259	AB018268	1	-0.5	0.0049
DDI2 /// RSC1A1	DNA-damage inducible 1 homolog 2 (S. cerevisiae) /// regulatory solute carrier protein, family 1, member 1	225780_at	6248 /// 84301	AL565415	1	-0.3	0.038
DDX11	DEAD/H (Asp-Glu-Ala-Asp/His) box helicase 11	210206_s_at	1663	U33833	1	-0.4	0.029
DDX11	DEAD/H (Asp-Glu-Ala-Asp/His) box helicase 11	232816_s_at	1663	AW571709	1	-0.4	0.013
DDX18	DEAD (Asp-Glu-Ala-Asp) box polypeptide 18	205763_s_at	8886	NM_006773	1	-0.4	0.03
DDX18	DEAD (Asp-Glu-Ala-Asp) box polypeptide 18	208896_at	8886	X98743	1	-0.3	0.037
DDX27	DEAD (Asp-Glu-Ala-Asp) box polypeptide 27	221780_s_at	55661	AF336851	1	-0.3	0.03
DDX31	DEAD (Asp-Glu-Ala-Asp) box polypeptide 31	235436_at	64794	BE503800	1	-0.4	0.026
DDX42	DEAD (Asp-Glu-Ala-Asp) box helicase 42	1559954_s_at	11325	AF147429	1	-0.5	0.0064
DDX42	DEAD (Asp-Glu-Ala-Asp) box helicase 42	201788_at	11325	NM_007372	1	-0.3	0.029
DDX43	DEAD (Asp-Glu-Ala-Asp) box polypeptide 43	220004_at	55510	NM_018665	1	-0.6	0.0029
DDX46	DEAD (Asp-Glu-Ala-Asp) box polypeptide 46	228039_at	9879	AI765169	1	-0.3	0.046
DDX6	DEAD (Asp-Glu-Ala-Asp) box helicase 6	225549_at	1656	BF129093	1	-0.4	0.04
DDX60	DEAD (Asp-Glu-Ala-Asp) box polypeptide 60	218986_s_at	55601	NM_017631	1	-0.4	0.027
DENND6A	DENN/MADD domain containing 6A	226965_at	201627	BF438017	1	-0.3	0.044
DENR	density-regulated protein	221509_at	8562	AB014731	1	-0.4	0.03
DEPDC1	DEP domain containing 1	222958_s_at	55635	AK000490	1	-0.3	0.044
DEPDC7	DEP domain containing 7	228293_at	91614	AJ245600	1	-0.4	0.034
DEPTOR	DEP domain containing MTOR-interacting protein	234071_at	64798	AU147969	1	0.3	0.038
DGAT2	diacylglycerol O-acyltransferase 2	226064_s_at	84649	AW469523	1	-0.3	0.034
DGCR14 /// TSSK2	DiGeorge syndrome critical region gene 14 /// testis-specific serine kinase 2	204383_at	8220 /// 23617	NM_022719	1	-0.4	0.022
DGCR14 /// TSSK2	DiGeorge syndrome critical region gene 14 /// testis-specific serine kinase 2	32032_at	8220 /// 23617	L77566	1	-0.4	0.027
DGCR5 /// LOC100287576	DiGeorge syndrome critical region gene 5 (non-protein coding) /// uncharacterized LOC100287576	1558118_at	26220 /// 100287576	BU584635	1	0.3	0.05
DGKH	diacylglycerol kinase, eta	235952_at	160851	AA521504	1	-0.4	0.022
DGKH	diacylglycerol kinase, eta	240145_at	160851	AW628059	1	-0.3	0.046
DHFR	dihydrofolate reductase	202532_s_at	1719	BC000192	1	-0.4	0.05
DHFR	dihydrofolate reductase	48808_at	1719	AI144299	1	-0.4	0.037
DHFRL1	dihydrofolate reductase-like 1	241727_x_at	200895	AA578546	1	-0.3	0.042
DHODH	dihydroorotate dehydrogenase (quinone)	213631_x_at	1723	BE789211	1	-0.4	0.03
DHODH	dihydroorotate dehydrogenase (quinone)	217647_at	1723	AA070330	1	-0.4	0.031
DHRS11	dehydrogenase/reductase (SDR family) member 11	218756_s_at	79154	NM_024308	1	-0.3	0.04
DHRS4 /// DHRS4L2	dehydrogenase/reductase (SDR family) member 4 /// dehydrogenase/reductase (SDR family) member 4 like 2	218021_at	10901 /// 317749	NM_021004	1	-0.3	0.029
DHTKD1	dehydrogenase E1 and transketolase domain containing 1	227094_at	55526	AI934407	1	-0.4	0.018
DHX16	DEAH (Asp-Glu-Ala-His) box polypeptide 16	203694_s_at	8449	NM_003587	1	-0.3	0.026
DHX40	DEAH (Asp-Glu-Ala-His) box polypeptide 40	222574_s_at	79665	BF431360	1	-0.3	0.047
DIAPH1	diaphanous-related formin 1	209190_s_at	1729	AF051782	1	-0.4	0.03
DICER1	dicer 1, ribonuclease type III	213229_at	23405	BF590131	1	-0.4	0.022
DIP2A	DIP2 disco-interacting protein 2 homolog A (Drosophila)	227199_at	23181	AW027812	1	-0.6	0.0075
DIRAS3	DIRAS family, GTP-binding RAS-like 3	215506_s_at	9077	AK021882	1	-0.5	0.042
DIS3	DIS3 exosome endoribonuclease and 3'-5' exoribonuclease	218362_s_at	22894	NM_014953	1	-0.6	0.037
DIS3L	DIS3 like exosome 3'-5' exoribonuclease	235005_at	115752	AA192361	1	-0.3	0.046
DIS3L2	DIS3 like 3'-5' exoribonuclease 2	238602_at	129563	AL036541	1	-0.4	0.029
DKK3	dickkopf WNT signaling pathway inhibitor 3	214247_s_at	27122	AU148057	1	-0.4	0.016
DKK3	dickkopf WNT signaling pathway inhibitor 3	221126_at	27122	NM_006394	1	0.3	0.031
DLGAP5	discs, large (Drosophila) homolog-associated protein 5	203764_at	9787	NM_014750	1	-0.6	0.0019
DLK1	delta-like 1 homolog (Drosophila)	235600_at	8788	N63890	1	0.4	0.016
DLX2	distal-less homeobox 2	215685_s_at	1746	BE792224	1	0.5	0.046
DMAP1	DNA methyltransferase 1 associated protein 1	224163_s_at	55929	AL136657	1	-0.4	0.022
DMXL1	Dmx-like 1	203791_at	1657	NM_005509	1	-0.5	0.018
DNAAF1	dynein, axonemal, assembly factor 1	215173_at	123872	N46852	1	0.4	0.045
DNAJB4	DnaJ (Hsp40) homolog, subfamily B, member 4	203810_at	11080	BG252490	1	0.5	0.01
DNAJB4	DnaJ (Hsp40) homolog, subfamily B, member 4	203811_s_at	11080	NM_007034	1	0.4	0.042
DNAJC10	DnaJ (Hsp40) homolog, subfamily C, member 10	229588_at	54431	AA651899	1	-0.4	0.024
DNAJC14	DnaJ (Hsp40) homolog, subfamily C, member 14	1554451_s_at	85406	AF141342	1	-0.6	0.0049
DNAJC27	DnaJ (Hsp40) homolog, subfamily C, member 27	227859_at	51277	AV706343	1	-0.4	0.032
DNAJC3	DnaJ (Hsp40) homolog, subfamily C, member 3	1558080_s_at	5611	BG913589	1	-0.6	0.014
DNAJC9	DnaJ (Hsp40) homolog, subfamily C, member 9	213092_x_at	23234	AW241779	1	-0.7	0.0021
DNASE1	deoxyribonuclease I	240144_at	1773	AI692769	1	0.4	0.04
DNLZ	DNL-type zinc finger	228272_at	728489	AI768208	1	-0.4	0.038
DNM2	dynamin 2	216024_at	1785	AK023207	1	0.3	0.045
DNMT1	DNA (cytosine-5-)-methyltransferase 1	201697_s_at	1786	NM_001379	1	-0.4	0.031
DNPH1	2'-deoxynucleoside 5'-phosphate N-hydrolase 1	204238_s_at	10591	NM_006443	1	-0.4	0.038
DOCK2	dedicator of cytokinesis 2	213160_at	1794	D86964	1	0.5	0.028
DOCK5	dedicator of cytokinesis 5	1561276_at	80005	AL832744	1	0.4	0.037
DOCK5	dedicator of cytokinesis 5	230263_s_at	80005	BF447954	1	-0.3	0.045
DOCK8	dedicator of cytokinesis 8	239027_at	81704	AV760561	1	0.4	0.027
DPH6-AS1	DPH6 antisense RNA 1 (head to head)	240523_at	100507466	AI989591	1	0.3	0.026
DPYSL3	dihydropyrimidinase-like 3	201431_s_at	1809	NM_001387	1	-0.4	0.03
DR1	down-regulator of transcription 1, TBP-binding (negative cofactor 2)	1558236_at	1810	BC014318	1	-0.5	0.01
DR1	down-regulator of transcription 1, TBP-binding (negative cofactor 2)	1558237_x_at	1810	BC014318	1	-0.4	0.044
DRAM1	DNA-damage regulated autophagy modulator 1	218627_at	55332	NM_018370	1	-0.3	0.049
DRAM2	DNA-damage regulated autophagy modulator 2	225228_at	128338	AI474054	1	-0.4	0.02
DRD1	dopamine receptor D1	214652_at	1812	X58987	1	0.7	0.0073
DSCR9	Down syndrome critical region gene 9 (non-protein coding)	230470_at	257203	AW510868	1	0.3	0.04
DSP	desmoplakin	200606_at	1832	NM_004415	1	-0.3	0.045
DST	dystonin	204455_at	667	NM_001723	1	-0.4	0.017
DST	dystonin	212254_s_at	667	AI798790	1	-0.3	0.046
DST	dystonin	215016_x_at	667	BC004912	1	-0.4	0.017
DTL	denticleless E3 ubiquitin protein ligase homolog (Drosophila)	218585_s_at	51514	NM_016448	1	-0.4	0.022
DTL	denticleless E3 ubiquitin protein ligase homolog (Drosophila)	222680_s_at	51514	AK001261	1	-0.4	0.017
DTYMK	deoxythymidylate kinase (thymidylate kinase)	1553984_s_at	1841	AF258562	1	-0.4	0.03
DUSP1	dual specificity phosphatase 1	201041_s_at	1843	NM_004417	1	1.2	4.6e-06
DUSP10	dual specificity phosphatase 10	215501_s_at	11221	AK022513	1	0.3	0.049
DUSP16	dual specificity phosphatase 16	224336_s_at	80824	AB052156	1	0.5	0.014
DUSP8 /// LOC101927562	dual specificity phosphatase 8 /// putative uncharacterized protein C11orf81-like	206374_at	1850 /// 101927562	NM_004420	1	0.7	0.0016
DUT	deoxyuridine triphosphatase	208955_at	1854	AB049113	1	-0.5	0.008
DYNC1H1	dynein, cytoplasmic 1, heavy chain 1	211928_at	1778	AB002323	1	-0.3	0.047
DYNC1H1	dynein, cytoplasmic 1, heavy chain 1	229115_at	1778	BF000332	1	-0.5	0.026
DYNC2LI1	dynein, cytoplasmic 2, light intermediate chain 1	203762_s_at	51626	NM_016008	1	-0.3	0.028
DYNC2LI1	dynein, cytoplasmic 2, light intermediate chain 1	203763_at	51626	NM_016008	1	-0.5	0.0076
DYNC2LI1	dynein, cytoplasmic 2, light intermediate chain 1	241757_x_at	51626	AA947051	1	-0.4	0.036
DYNLL1-AS1	DYNLL1 antisense RNA 1	238854_at	100506668	AW242904	1	-0.5	0.025
DZIP3	DAZ interacting zinc finger protein 3	213186_at	9666	BG502305	1	-0.4	0.034
E2F7	E2F transcription factor 7	228033_at	144455	AI341146	1	-0.6	0.0036
E2F8	E2F transcription factor 8	219990_at	79733	NM_024680	1	-0.6	0.0023
EBI3	Epstein-Barr virus induced 3	219424_at	10148	NM_005755	1	0.3	0.034
EBLN3	endogenous Bornavirus-like nucleoprotein 3	225635_s_at	100506710	BG535378	1	-0.3	0.03
ECT2	epithelial cell transforming 2	219787_s_at	1894	NM_018098	1	-0.3	0.047
EEF1A1	eukaryotic translation elongation factor 1 alpha 1	227708_at	1915	AW469790	1	-0.5	0.022
EFCAB13	EF-hand calcium binding domain 13	1553626_a_at	124989	NM_152347	1	0.5	0.016
EFCAB2	EF-hand calcium binding domain 2	207572_at	84288	NM_024716	1	0.4	0.03
EFCAB2	EF-hand calcium binding domain 2	223608_at	84288	BC005357	1	-0.5	0.014
EFTUD2	elongation factor Tu GTP binding domain containing 2	222398_s_at	9343	BC002360	1	-0.3	0.037
EGOT	eosinophil granule ontogeny transcript (non-protein coding)	222314_x_at	100126791	AW970881	1	0.5	0.024
EGR1	early growth response 1	201693_s_at	1958	AV733950	1	1.5	1.7e-06
EGR1	early growth response 1	201694_s_at	1958	NM_001964	1	1.6	1.7e-06
EGR1	early growth response 1	227404_s_at	1958	AI459194	1	2.3	5.3e-09
EGR2	early growth response 2	205249_at	1959	NM_000399	1	1.8	1.4e-06
EGR4	early growth response 4	207767_s_at	1961	NM_001965	1	0.6	0.002
EGR4	early growth response 4	207768_at	1961	NM_001965	1	2.1	1.8e-08
EHBP1L1	EH domain binding protein 1-like 1	221755_at	254102	BG334196	1	-0.5	0.013
EHBP1L1	EH domain binding protein 1-like 1	91703_at	254102	AA149545	1	-0.5	0.0098
EID2B	EP300 interacting inhibitor of differentiation 2B	242470_at	126272	AI093963	1	-0.6	0.0031
EIF2AK1	eukaryotic translation initiation factor 2-alpha kinase 1	217735_s_at	27102	AW007368	1	-0.3	0.048
EIF2S1	eukaryotic translation initiation factor 2, subunit 1 alpha, 35kDa	201143_s_at	1965	BC002513	1	-0.3	0.038
EIF2S3	eukaryotic translation initiation factor 2, subunit 3 gamma, 52kDa	205321_at	1968	NM_001415	1	-0.8	0.022
EIF3A	eukaryotic translation initiation factor 3, subunit A	200597_at	8661	AI123320	1	-0.7	0.0016
EIF3J	eukaryotic translation initiation factor 3, subunit J	208264_s_at	8669	NM_003758	1	-0.4	0.01
EIF4E	eukaryotic translation initiation factor 4E	201436_at	1977	AI742789	1	-0.3	0.05
EIF4EBP2	eukaryotic translation initiation factor 4E binding protein 2	224653_at	1979	U88989	1	-0.3	0.036
EIF5B	eukaryotic translation initiation factor 5B	201025_at	9669	AB018284	1	-0.4	0.014
ELAVL1	ELAV like RNA binding protein 1	201727_s_at	1994	NM_001419	1	-0.3	0.046
ELAVL4	ELAV like neuron-specific RNA binding protein 4	234904_x_at	1996	S73887	1	0.3	0.05
ELF4	E74-like factor 4 (ets domain transcription factor)	31845_at	2000	U32645	1	-0.5	0.0062
ELK4	ELK4, ETS-domain protein (SRF accessory protein 1)	238761_at	2005	BE645241	1	-0.4	0.024
ELP3	elongator acetyltransferase complex subunit 3	227075_at	55140	AI949204	1	-0.5	0.0099
EMC1	ER membrane protein complex subunit 1	212396_s_at	23065	AI143233	1	-0.3	0.041
EML1	echinoderm microtubule associated protein like 1	204796_at	2009	AI825937	1	-0.4	0.044
EML4	echinoderm microtubule associated protein like 4	228674_s_at	27436	AA524507	1	-0.4	0.032
EMR1	egf-like module containing, mucin-like, hormone receptor-like 1	207111_at	2015	NM_001974	1	0.4	0.02
ENAH	enabled homolog (Drosophila)	217820_s_at	55740	NM_018212	1	-0.4	0.047
ENTPD1	ectonucleoside triphosphate diphosphohydrolase 1	207691_x_at	953	NM_001776	1	0.3	0.034
ENTPD4	ectonucleoside triphosphate diphosphohydrolase 4	204076_at	9583	AB002390	1	-0.4	0.026
EOGT	EGF domain-specific O-linked N-acetylglucosamine (GlcNAc) transferase	221935_s_at	285203	AK023140	1	-0.4	0.026
EP300-AS1	EP300 antisense RNA 1	1562921_at	101927279	BC040700	1	-0.8	0.0065
EPB41L4A	erythrocyte membrane protein band 4.1 like 4A	220120_s_at	64097	NM_022140	1	-0.4	0.03
EPB41L4A	erythrocyte membrane protein band 4.1 like 4A	228256_s_at	64097	AU144565	1	-0.4	0.023
EPB41L4A-AS1	EPB41L4A antisense RNA 1	225698_at	114915	BF314746	1	-0.4	0.027
EPB41L5	erythrocyte membrane protein band 4.1 like 5	230951_at	57669	AW242920	1	-0.4	0.03
EPHA3	EPH receptor A3	206070_s_at	2042	AF213459	1	-0.3	0.041
EPHA4	EPH receptor A4	238671_at	2043	AW452235	1	0.4	0.024
EPHA7	EPH receptor A7	206852_at	2045	NM_004440	1	-0.4	0.031
EPHA7	EPH receptor A7	229288_at	2045	BF439579	1	-0.3	0.048
EPHA7	EPH receptor A7	238533_at	2045	AA651750	1	-0.3	0.043
EPPK1	epiplakin 1	208156_x_at	83481	NM_031308	1	-0.3	0.034
EPPK1	epiplakin 1	232164_s_at	83481	AL137725	1	-0.6	0.014
EPPK1	epiplakin 1	232165_at	83481	AL137725	1	-0.5	0.016
EPS15L1	epidermal growth factor receptor pathway substrate 15-like 1	231926_at	58513	AK023744	1	-0.4	0.022
ERBB2	v-erb-b2 avian erythroblastic leukemia viral oncogene homolog 2	234354_x_at	2064	S57296	1	-0.4	0.014
ERCC6L2	excision repair cross-complementation group 6-like 2	229710_at	375748	AA843541	1	-0.4	0.014
ERGIC2	ERGIC and golgi 2	240172_at	51290	AA102332	1	-0.3	0.031
ERI1	exoribonuclease 1	226416_at	90459	AL137679	1	-0.4	0.026
ERICH1	glutamate-rich 1	227017_at	157697	BE644894	1	-0.6	0.0065
ERICH5	glutamate-rich 5	1552389_at	203111	NM_173549	1	-0.4	0.038
ERICH5	glutamate-rich 5	1552390_a_at	203111	NM_173549	1	-0.4	0.018
ERMP1	endoplasmic reticulum metallopeptidase 1	222603_at	79956	AL136980	1	-0.3	0.038
ERVFH21-1	endogenous retrovirus group FH21, member 1	1557914_s_at	100616104	AU140866	1	0.4	0.025
ESCO2	establishment of sister chromatid cohesion N-acetyltransferase 2	235178_x_at	157570	AL120674	1	-0.4	0.021
ESPL1	extra spindle pole bodies homolog 1 (S. cerevisiae)	204817_at	9700	NM_012291	1	-0.4	0.032
ESPL1	extra spindle pole bodies homolog 1 (S. cerevisiae)	38158_at	9700	D79987	1	-0.4	0.016
ESYT2	extended synaptotagmin-like protein 2	1558511_s_at	57488	AA187963	1	-0.4	0.019
ESYT2	extended synaptotagmin-like protein 2	224698_at	57488	AB033054	1	-0.4	0.03
ETFB	electron-transfer-flavoprotein, beta polypeptide	202942_at	2109	NM_001985	1	-0.5	0.024
ETFDH	electron-transferring-flavoprotein dehydrogenase	205530_at	2110	NM_004453	1	-0.4	0.022
ETNK1	ethanolamine kinase 1	219017_at	55500	NM_018638	1	-0.4	0.026
ETV5	ets variant 5	203349_s_at	2119	NM_004454	1	-0.3	0.036
EVA1B	eva-1 homolog B (C. elegans)	229998_x_at	55194	AI304355	1	0.4	0.036
EVL	Enah/Vasp-like	217838_s_at	51466	NM_016337	1	-0.4	0.032
EWSR1	EWS RNA-binding protein 1	209214_s_at	2130	BC004817	1	-0.4	0.017
EXOSC10	exosome component 10	207541_s_at	5394	NM_002685	1	-0.5	0.0098
EXOSC2	exosome component 2	209527_at	23404	BC000747	1	-0.4	0.026
EXOSC6	exosome component 6	1553947_at	118460	NM_058219	1	-0.4	0.039
EXPH5	exophilin 5	213929_at	23086	AL050204	1	-0.4	0.029
EXT1	exostosin glycosyltransferase 1	230183_at	2131	AW189467	1	-0.3	0.041
EZH2	enhancer of zeste 2 polycomb repressive complex 2 subunit	203358_s_at	2146	NM_004456	1	-0.4	0.031
F11	coagulation factor XI	1563160_at	2160	BC020617	1	0.3	0.032
F5	coagulation factor V (proaccelerin, labile factor)	231029_at	2153	AI740541	1	-0.4	0.038
FA2H	fatty acid 2-hydroxylase	219429_at	79152	NM_024306	1	-0.3	0.043
FADS1 /// MIR1908	fatty acid desaturase 1 /// microRNA 1908	208964_s_at	3992 /// 100302263	AL512760	1	-0.3	0.048
FAHD1	fumarylacetoacetate hydrolase domain containing 1	226767_s_at	81889	AI341467	1	-0.4	0.031
FAM102B	family with sequence similarity 102, member B	226568_at	284611	AI478747	1	-0.3	0.05
FAM107B	family with sequence similarity 107, member B	223058_at	83641	AL136885	1	-0.4	0.025
FAM107B	family with sequence similarity 107, member B	223059_s_at	83641	BC004872	1	-0.4	0.02
FAM111B	family with sequence similarity 111, member B	1557129_a_at	374393	AA960844	1	-0.6	0.012
FAM115A /// LOC100294033	family with sequence similarity 115, member A /// protein FAM115A-like	212979_s_at	9747 /// 100294033	AW293343	1	-0.4	0.022
FAM115A /// LOC100294033	family with sequence similarity 115, member A /// protein FAM115A-like	212981_s_at	9747 /// 100294033	BF030508	1	-0.6	0.0038
FAM117B	family with sequence similarity 117, member B	226431_at	150864	AK025007	1	-0.4	0.028
FAM118A	family with sequence similarity 118, member A	219629_at	55007	NM_017911	1	-0.4	0.018
FAM122B	family with sequence similarity 122B	222673_x_at	159090	AI582192	1	-0.5	0.016
FAM122B	family with sequence similarity 122B	225361_x_at	159090	AI348001	1	-0.4	0.015
FAM134A	family with sequence similarity 134, member A	222129_at	79137	AK026155	1	-0.4	0.023
FAM13B	family with sequence similarity 13, member B	218518_at	51306	NM_016603	1	-0.4	0.016
FAM149A	family with sequence similarity 149, member A	214889_at	25854	AL080065	1	-0.5	0.01
FAM149A	family with sequence similarity 149, member A	214890_s_at	25854	AL080065	1	-0.5	0.01
FAM161A	family with sequence similarity 161, member A	1564467_at	84140	AK091575	1	-0.6	0.0029
FAM161A	family with sequence similarity 161, member A	242584_at	84140	AI954412	1	-0.4	0.029
FAM168A	family with sequence similarity 168, member A	36612_at	23201	D87470	1	-0.4	0.019
FAM168B	family with sequence similarity 168, member B	212017_at	130074	BF677404	1	-0.3	0.045
FAM171A1	family with sequence similarity 171, member A1	212771_at	221061	AU150943	1	0.4	0.015
FAM198B	family with sequence similarity 198, member B	223204_at	51313	AF260333	1	-0.5	0.02
FAM199X	family with sequence similarity 199, X-linked	225216_at	139231	AI590719	1	-0.3	0.048
FAM201A	family with sequence similarity 201, member A	1557014_a_at	158228	BC041970	1	-0.5	0.038
FAM204A	family with sequence similarity 204, member A	234947_s_at	63877	AK026630	1	-0.4	0.028
FAM213B	family with sequence similarity 213, member B	231835_at	127281	AL359575	1	-0.3	0.044
FAM214A	family with sequence similarity 214, member A	235193_at	56204	BG036618	1	-0.3	0.031
FAM228A	family with sequence similarity 228, member A	231386_at	653140	AW206421	1	0.3	0.049
FAM46A	family with sequence similarity 46, member A	221766_s_at	55603	AW246673	1	0.6	0.015
FAM49B	family with sequence similarity 49, member B	228987_at	51571	AA156238	1	-0.4	0.038
FAM53A	family with sequence similarity 53, member A	1569139_s_at	152877	BC042071	1	-0.4	0.04
FAM53B-AS1	FAM53B antisense RNA 1	1559812_at	101927944	BC041007	1	0.4	0.019
FAM71C	family with sequence similarity 71, member C	1552526_at	196472	NM_153364	1	0.3	0.05
FAM72A /// FAM72B /// FAM72C /// FAM72D	family with sequence similarity 72, member A /// family with sequence similarity 72, member B /// family with sequence similarity 72, member C /// family with sequence similarity 72, member D	225834_at	554282 /// 653820 /// 728833 /// 729533	AL135396	1	-0.4	0.029
FAM73A	family with sequence similarity 73, member A	235125_x_at	374986	AI078279	1	-0.3	0.028
FAM76B	family with sequence similarity 76, member B	226753_at	143684	AW138704	1	-0.4	0.022
FAM76B	family with sequence similarity 76, member B	232048_at	143684	BF214358	1	-0.3	0.038
FAM81A	family with sequence similarity 81, member A	227756_at	145773	AI381626	1	-0.3	0.049
FAM98B	family with sequence similarity 98, member B	225086_at	283742	BF679966	1	-0.4	0.031
FANCD2	Fanconi anemia, complementation group D2	242560_at	2177	AA579890	1	-0.8	0.0012
FANCG	Fanconi anemia, complementation group G	203564_at	2189	NM_004629	1	-0.3	0.048
FANCI	Fanconi anemia, complementation group I	213007_at	55215	W74442	1	-0.6	0.004
FANCI	Fanconi anemia, complementation group I	213008_at	55215	BG403615	1	-0.5	0.0092
FANCL	Fanconi anemia, complementation group L	218397_at	55120	NM_018062	1	-0.3	0.038
FAR1	fatty acyl CoA reductase 1	224866_at	84188	AK024967	1	-0.5	0.01
FARSA	phenylalanyl-tRNA synthetase, alpha subunit	202159_at	2193	NM_004461	1	-0.3	0.036
FBRSL1	fibrosin-like 1	225703_at	57666	AL583509	1	-0.3	0.04
FBRSL1	fibrosin-like 1	225704_at	57666	AA527531	1	-0.4	0.03
FBXL20	F-box and leucine-rich repeat protein 20	226842_at	84961	AV694039	1	-0.3	0.038
FBXL20	F-box and leucine-rich repeat protein 20	232412_at	84961	AK024690	1	-0.6	0.047
FBXL8	F-box and leucine-rich repeat protein 8	220080_at	55336	NM_018378	1	-0.3	0.05
FBXO11	F-box protein 11	219208_at	80204	NM_025133	1	-0.4	0.038
FBXO21	F-box protein 21	212231_at	23014	AB020682	1	-0.4	0.023
FBXO3	F-box protein 3	238686_at	26273	AA130258	1	-0.4	0.027
FBXO31	F-box protein 31	224162_s_at	79791	BC002985	1	-0.3	0.033
FBXO32	F-box protein 32	225328_at	114907	N21643	1	-0.4	0.023
FBXO44	F-box protein 44	222861_x_at	93611	NM_012168	1	0.3	0.032
FBXO5	F-box protein 5	218875_s_at	26271	NM_012177	1	-0.4	0.026
FBXO9	F-box protein 9	1566509_s_at	26268	AK095315	1	-0.4	0.022
FCF1	FCF1 rRNA-processing protein	219927_at	51077	NM_015962	1	-0.4	0.027
FCF1 /// MAPK1IP1L	FCF1 rRNA-processing protein /// mitogen-activated protein kinase 1 interacting protein 1-like	212499_s_at	51077 /// 93487	AK025580	1	-0.4	0.016
FCRL5	Fc receptor-like 5	224404_s_at	83416	AF343662	1	0.4	0.034
FDX1	ferredoxin 1	203647_s_at	2230	M18003	1	-0.3	0.038
FECH	ferrochelatase	203115_at	2235	AU152635	1	-0.4	0.036
FEN1	flap structure-specific endonuclease 1	204767_s_at	2237	BC000323	1	-0.4	0.025
FERMT1	fermitin family member 1	60474_at	55612	AA469071	1	-0.3	0.046
FGD4	FYVE, RhoGEF and PH domain containing 4	230559_x_at	121512	AI277617	1	-0.6	0.011
FGFR2	fibroblast growth factor receptor 2	203638_s_at	2263	NM_022969	1	-0.3	0.05
FGFR3	fibroblast growth factor receptor 3	204379_s_at	2261	NM_000142	1	-0.5	0.012
FGFR3	fibroblast growth factor receptor 3	204380_s_at	2261	M58051	1	-0.4	0.025
FGFR4	fibroblast growth factor receptor 4	204579_at	2264	NM_002011	1	-0.4	0.028
FGFRL1	fibroblast growth factor receptor-like 1	223321_s_at	53834	AF312678	1	-0.4	0.04
FH	fumarate hydratase	203032_s_at	2271	AI363836	1	-0.3	0.039
FH	fumarate hydratase	214170_x_at	2271	AA669797	1	-0.3	0.048
FHL5	four and a half LIM domains 5	220170_at	9457	NM_020482	1	0.4	0.044
FIBP	fibroblast growth factor (acidic) intracellular binding protein	202041_s_at	9158	NM_004214	1	-0.3	0.043
FIGN	fidgetin	238964_at	55137	BE960968	1	-0.5	0.023
FIGNL1	fidgetin-like 1	222843_at	63979	AK023411	1	-0.4	0.016
FIP1L1	factor interacting with PAPOLA and CPSF1	221007_s_at	81608	NM_030917	1	-0.4	0.022
FKBP15	FK506 binding protein 15, 133kDa	76897_s_at	23307	AA628140	1	-0.4	0.043
FLJ37035	uncharacterized LOC399821	1560714_at	399821	AK094354	1	0.4	0.02
FLJ37453	uncharacterized LOC729614	227593_at	729614	AW964477	1	-0.4	0.05
FLNA	filamin A, alpha	213746_s_at	2316	AW051856	1	-0.4	0.035
FNDC5	fibronectin type III domain containing 5	230646_at	252995	BF445046	1	0.3	0.038
FNIP1	folliculin interacting protein 1	228250_at	96459	AW263086	1	-0.5	0.01
FNIP2	folliculin interacting protein 2	225922_at	57600	BE501838	1	-0.3	0.038
FOS	FBJ murine osteosarcoma viral oncogene homolog	209189_at	2353	BC004490	1	1.4	7.6e-07
FOSB	FBJ murine osteosarcoma viral oncogene homolog B	202768_at	2354	NM_006732	1	0.7	0.0012
FOSL2	FOS-like antigen 2	228188_at	2355	AI860150	1	-0.3	0.034
FOXF2	forkhead box F2	206377_at	2295	NM_001452	1	0.5	0.024
FOXJ2	forkhead box J2	1555305_at	55810	AF155133	1	0.3	0.045
FOXK1	forkhead box K1	226715_at	221937	AW007319	1	-0.4	0.018
FOXM1	forkhead box M1	202580_x_at	2305	NM_021953	1	-0.5	0.006
FOXN3	forkhead box N3	218031_s_at	1112	NM_018589	1	-0.3	0.05
FOXRED1	FAD-dependent oxidoreductase domain containing 1	223128_at	55572	AL136923	1	-0.3	0.038
FRA10AC1	fragile site, folic acid type, rare, fra(10)(q23.3) or fra(10)(q24.2) candidate 1	226398_s_at	118924	AI804930	1	-0.4	0.04
FRAS1	Fraser extracellular matrix complex subunit 1	226145_s_at	80144	AL157471	1	-0.5	0.027
FRAT2	frequently rearranged in advanced T-cell lymphomas 2	209864_at	23401	AB045118	1	-0.5	0.0061
FREM2	FRAS1 related extracellular matrix protein 2	230964_at	341640	N66307	1	-0.4	0.04
FRS2	fibroblast growth factor receptor substrate 2	226045_at	10818	AW264515	1	-0.4	0.019
FST	follistatin	204948_s_at	10468	NM_013409	1	-0.5	0.007
FST	follistatin	207345_at	10468	NM_006350	1	-0.4	0.028
FST	follistatin	226847_at	10468	BF438173	1	-0.5	0.011
FTSJ2	FtsJ RNA methyltransferase homolog 2 (E. coli)	218356_at	29960	NM_013393	1	-0.3	0.032
FUBP1	far upstream element (FUSE) binding protein 1	214093_s_at	8880	AA156865	1	-0.6	0.011
FUCA2	fucosidase, alpha-L- 2, plasma	223120_at	2519	BC003060	1	-0.3	0.041
FUS	FUS RNA binding protein	1565717_s_at	2521	BE930017	1	-0.6	0.0027
FUS	FUS RNA binding protein	200959_at	2521	NM_004960	1	-0.4	0.016
FUS	FUS RNA binding protein	217370_x_at	2521	S75762	1	-0.3	0.036
FUT8-AS1	FUT8 antisense RNA 1	236835_at	645431	AI654093	1	-0.5	0.014
FXR1	fragile X mental retardation, autosomal homolog 1	230201_at	8087	R43158	1	-0.4	0.038
FYCO1	FYVE and coiled-coil domain containing 1	218204_s_at	79443	NM_024513	1	-0.5	0.0097
FZD2	frizzled class receptor 2	210220_at	2535	L37882	1	-0.4	0.02
FZD3	frizzled class receptor 3	219683_at	7976	NM_017412	1	-0.4	0.036
FZD5	frizzled class receptor 5	221245_s_at	7855	NM_030804	1	-0.3	0.046
FZD8 /// MIR4683	frizzled class receptor 8 /// microRNA 4683	224325_at	8325 /// 100616500	AB043703	1	-0.4	0.042
G3BP1	GTPase activating protein (SH3 domain) binding protein 1	225007_at	10146	AV705516	1	-0.4	0.029
G3BP1	GTPase activating protein (SH3 domain) binding protein 1	242422_at	10146	AA180161	1	-0.4	0.033
G3BP1	GTPase activating protein (SH3 domain) binding protein 1	244396_at	10146	BE673925	1	-0.4	0.027
G6PC3	glucose 6 phosphatase, catalytic, 3	44654_at	92579	AI669655	1	-0.3	0.038
GAB1	GRB2-associated binding protein 1	229114_at	2549	AW237741	1	-0.3	0.032
GABRA3	gamma-aminobutyric acid (GABA) A receptor, alpha 3	207210_at	2556	NM_000808	1	0.4	0.031
GABRA6	gamma-aminobutyric acid (GABA) A receptor, alpha 6	207182_at	2559	NM_000811	1	0.3	0.035
GAGE1	G antigen 1	208283_at	2543	NM_001468	1	0.4	0.036
GAK	cyclin G associated kinase	40225_at	2580	D88435	1	-0.5	0.012
GALNT10	polypeptide N-acetylgalactosaminyltransferase 10	212256_at	55568	BE906572	1	-0.3	0.049
GALNT11	polypeptide N-acetylgalactosaminyltransferase 11	219013_at	63917	NM_022087	1	-0.3	0.046
GALNT12	polypeptide N-acetylgalactosaminyltransferase 12	218885_s_at	79695	NM_024642	1	-0.5	0.01
GALNT12	polypeptide N-acetylgalactosaminyltransferase 12	222773_s_at	79695	AA554045	1	-0.3	0.04
GALNT7	polypeptide N-acetylgalactosaminyltransferase 7	218313_s_at	51809	NM_017423	1	-0.4	0.026
GAREM	GRB2 associated, regulator of MAPK1	228115_at	64762	AW299905	1	-0.8	0.0053
GAREM	GRB2 associated, regulator of MAPK1	235065_at	64762	AI546970	1	-0.3	0.041
GARS	glycyl-tRNA synthetase	208693_s_at	2617	D30658	1	-0.3	0.046
GAS5 /// SNORD44 /// SNORD47 /// SNORD74 /// SNORD76 /// SNORD77 /// SNORD79 /// SNORD80 /// SNORD81	growth arrest-specific 5 (non-protein coding) /// small nucleolar RNA, C/D box 44 /// small nucleolar RNA, C/D box 47 /// small nucleolar RNA, C/D box 74 /// small nucleolar RNA, C/D box 76 /// small nucleolar RNA, C/D box 77 /// small nucleolar RNA, C/D box 79 /// small nucleolar RNA, C/D box 80 /// small nucleolar RNA, C/D box 81	228238_at	26769 /// 26770 /// 26774 /// 26802 /// 26806 /// 60674 /// 619498 /// 692196 /// 692197	AW105301	1	0.7	0.0092
GATAD2A	GATA zinc finger domain containing 2A	222526_at	54815	AK024670	1	-0.5	0.01
GCAT	glycine C-acetyltransferase	205164_at	23464	NM_014291	1	-0.3	0.041
GCFC2	GC-rich sequence DNA-binding factor 2	216305_s_at	6936	AC005034	1	-0.3	0.044
GDAP1	ganglioside induced differentiation associated protein 1	226269_at	54332	BF002104	1	-0.5	0.019
GDAP1	ganglioside induced differentiation associated protein 1	226271_at	54332	N46350	1	-0.5	0.0067
GDF11	growth differentiation factor 11	217498_at	10220	BG389073	1	0.3	0.038
GEM	GTP binding protein overexpressed in skeletal muscle	204472_at	2669	NM_005261	1	0.7	0.0079
GFPT1	glutamine--fructose-6-phosphate transaminase 1	226886_at	2673	AF131846	1	-0.5	0.0078
GGA2	golgi-associated, gamma adaptin ear containing, ARF binding protein 2	210658_s_at	23062	BC000284	1	-0.3	0.037
GGCX	gamma-glutamyl carboxylase	235413_at	2677	AW191608	1	-0.4	0.026
GID8	GID complex subunit 8	225376_at	54994	BG480592	1	-0.3	0.038
GINS1	GINS complex subunit 1 (Psf1 homolog)	206102_at	9837	NM_021067	1	-0.4	0.04
GINS3	GINS complex subunit 3 (Psf3 homolog)	45633_at	64785	AI421812	1	-0.4	0.028
GINS4	GINS complex subunit 4 (Sld5 homolog)	211767_at	84296	BC005995	1	-0.4	0.012
GIPC2	GIPC PDZ domain containing family, member 2	219970_at	54810	NM_017655	1	-0.6	0.0052
GK5	glycerol kinase 5 (putative)	238121_at	256356	AI473796	1	-0.6	0.023
GK5	glycerol kinase 5 (putative)	241384_x_at	256356	AI866260	1	-0.4	0.029
GLE1	GLE1 RNA export mediator	225371_at	2733	AI638714	1	-0.3	0.027
GLTSCR1L	GLTSCR1-like	38892_at	23506	D87077	1	-0.5	0.012
GLUD2	glutamate dehydrogenase 2	210447_at	2747	BC005111	1	-0.3	0.032
GMCL1	germ cell-less, spermatogenesis associated 1	218458_at	64395	NM_022471	1	-0.4	0.019
GMCL1	germ cell-less, spermatogenesis associated 1	239355_at	64395	BF675979	1	-0.5	0.0088
GMDS	GDP-mannose 4,6-dehydratase	204875_s_at	2762	NM_001500	1	-0.4	0.023
GMDS	GDP-mannose 4,6-dehydratase	214106_s_at	2762	AI762113	1	-0.3	0.036
GMEB1	glucocorticoid modulatory element binding protein 1	235232_at	10691	AI061377	1	-0.3	0.036
GNA11	guanine nucleotide binding protein (G protein), alpha 11 (Gq class)	213766_x_at	2767	N36926	1	-0.4	0.03
GNAI1	guanine nucleotide binding protein (G protein), alpha inhibiting activity polypeptide 1	227692_at	2770	AU153866	1	-0.3	0.048
GNAI3	guanine nucleotide binding protein (G protein), alpha inhibiting activity polypeptide 3	201181_at	2773	NM_006496	1	-0.4	0.03
GNAQ	guanine nucleotide binding protein (G protein), q polypeptide	224861_at	2776	AA628423	1	-0.3	0.045
GNAQ	guanine nucleotide binding protein (G protein), q polypeptide	224862_at	2776	BF969428	1	-0.3	0.05
GNAS	GNAS complex locus	239037_at	2778	AA251879	1	0.4	0.034
GNB1L	guanine nucleotide binding protein (G protein), beta polypeptide 1-like	223563_at	54584	AB051432	1	0.3	0.043
GNB4	guanine nucleotide binding protein (G protein), beta polypeptide 4	223487_x_at	59345	AW504458	1	-0.5	0.023
GNG7	guanine nucleotide binding protein (G protein), gamma 7	206896_s_at	2788	NM_005145	1	0.3	0.048
GNL2	guanine nucleotide binding protein-like 2 (nucleolar)	201948_at	29889	NM_013285	1	-0.4	0.028
GNL3L	guanine nucleotide binding protein-like 3 (nucleolar)-like	217632_at	54552	BF035279	1	-0.3	0.049
GNRHR	gonadotropin-releasing hormone receptor	211523_at	2798	L07949	1	0.3	0.045
GNS	glucosamine (N-acetyl)-6-sulfatase	203676_at	2799	NM_002076	1	-0.6	0.028
GNS	glucosamine (N-acetyl)-6-sulfatase	212334_at	2799	BE880245	1	-0.4	0.024
GNS	glucosamine (N-acetyl)-6-sulfatase	212335_at	2799	AW167793	1	-0.4	0.027
GOLGB1	golgin B1	201056_at	2804	N53479	1	-0.4	0.018
GOLM1	golgi membrane protein 1	217771_at	51280	NM_016548	1	-0.4	0.025
GOSR2	golgi SNAP receptor complex member 2	213180_s_at	9570	BE895285	1	-0.3	0.048
GPANK1	G patch domain and ankyrin repeats 1	225472_at	7918	AF129756	1	-0.4	0.039
GPATCH1	G patch domain containing 1	219818_s_at	55094	NM_018025	1	-0.4	0.023
GPATCH2	G patch domain containing 2	239768_x_at	55105	BF207861	1	-0.4	0.038
GPC4	glypican 4	204984_at	2239	NM_001448	1	-0.5	0.012
GPM6A	glycoprotein M6A	236024_at	2823	AW136286	1	0.4	0.044
GPNMB	glycoprotein (transmembrane) nmb	1554018_at	10457	BC011595	1	-0.7	0.0066
GPRC5A	G protein-coupled receptor, class C, group 5, member A	235563_at	9052	BG250868	1	-0.4	0.02
GPRC5B	G protein-coupled receptor, class C, group 5, member B	203632_s_at	51704	NM_016235	1	-0.3	0.036
GPSM2	G-protein signaling modulator 2	221922_at	29899	AW195581	1	-0.5	0.004
GRAMD4	GRAM domain containing 4	212856_at	23151	AB018310	1	-0.3	0.035
GRB2	growth factor receptor-bound protein 2	223049_at	2885	AF246238	1	-0.3	0.038
GREB1L	growth regulation by estrogen in breast cancer-like	220340_at	80000	NM_024935	1	0.3	0.027
GRHL2	grainyhead-like 2 (Drosophila)	219388_at	79977	NM_024915	1	-0.3	0.03
GRIN2A	glutamate receptor, ionotropic, N-methyl D-aspartate 2A	231384_at	2903	T65537	1	-0.4	0.015
GRIN2A	glutamate receptor, ionotropic, N-methyl D-aspartate 2A	242286_at	2903	N48896	1	-0.3	0.029
GRM5	glutamate receptor, metabotropic 5	214217_at	2915	D60132	1	-0.4	0.023
GRN	granulin	216041_x_at	2896	AK023348	1	-0.3	0.046
GRTP1	growth hormone regulated TBC protein 1	229377_at	79774	BF001483	1	-0.4	0.028
GSAP	gamma-secretase activating protein	222150_s_at	54103	AK026747	1	-0.4	0.035
GSE1	Gse1 coiled-coil protein	212057_at	23199	AA206161	1	-0.3	0.05
GSK3B	glycogen synthase kinase 3 beta	226191_at	2932	AI431788	1	-0.3	0.038
GSN	gelsolin	200696_s_at	2934	NM_000177	1	-0.4	0.038
GTF2A1	general transcription factor IIA, 1, 19/37kDa	225433_at	2957	AU144104	1	-0.6	0.0012
GTF2F2	general transcription factor IIF, polypeptide 2, 30kDa	209595_at	2963	BC001771	1	-0.4	0.016
GTF2H3	general transcription factor IIH, polypeptide 3, 34kDa	222104_x_at	2967	AI569458	1	-0.4	0.041
GTF2H3	general transcription factor IIH, polypeptide 3, 34kDa	239346_at	2967	AI097560	1	-0.5	0.013
GTF2H4	general transcription factor IIH, polypeptide 4, 52kDa	203577_at	2968	NM_001517	1	-0.4	0.029
GTPBP1	GTP binding protein 1	219357_at	9567	NM_014027	1	-0.3	0.039
GTPBP4	GTP binding protein 4	218239_s_at	23560	NM_012341	1	-0.3	0.039
GTPBP4 /// IDI2	GTP binding protein 4 /// isopentenyl-diphosphate delta isomerase 2	228002_at	23560 /// 91734	AI814569	1	-0.3	0.034
GTSE1	G-2 and S-phase expressed 1	204315_s_at	51512	AI340239	1	-0.6	0.018
GTSE1	G-2 and S-phase expressed 1	204318_s_at	51512	NM_016426	1	-0.7	0.004
GTSE1	G-2 and S-phase expressed 1	215942_s_at	51512	BF973178	1	-0.6	0.0056
GUCA1C	guanylate cyclase activator 1C	233902_at	9626	AF110003	1	0.5	0.015
GUF1	GUF1 GTPase homolog (S. cerevisiae)	218884_s_at	60558	NM_021927	1	-0.4	0.038
GUF1	GUF1 GTPase homolog (S. cerevisiae)	222770_s_at	60558	AK025248	1	-0.3	0.042
GUSB	glucuronidase, beta	202605_at	2990	NM_000181	1	-0.6	0.007
GUSBP11	glucuronidase, beta pseudogene 11	213502_x_at	91316	AA398569	1	-0.4	0.043
GYPA	glycophorin A (MNS blood group)	1559520_at	2993	AL833104	1	0.3	0.048
GYPC	glycophorin C (Gerbich blood group)	202947_s_at	2995	NM_002101	1	0.3	0.047
H2AFV	H2A histone family, member V	212205_at	94239	AA534860	1	-0.6	0.004
H2AFV	H2A histone family, member V	212206_s_at	94239	BF343852	1	-0.4	0.024
H2AFX	H2A histone family, member X	205436_s_at	3014	NM_002105	1	-0.4	0.016
H2AFZ	H2A histone family, member Z	200853_at	3015	NM_002106	1	-0.4	0.03
HADHA	hydroxyacyl-CoA dehydrogenase/3-ketoacyl-CoA thiolase/enoyl-CoA hydratase (trifunctional protein), alpha subunit	208630_at	3030	AI972144	1	-0.3	0.035
HAP1	huntingtin-associated protein 1	238275_at	9001	AI809524	1	0.4	0.049
HAT1	histone acetyltransferase 1	203138_at	8520	NM_003642	1	-0.3	0.032
HAUS2	HAUS augmin-like complex, subunit 2	228744_at	55142	AW611729	1	-0.4	0.032
HAUS5	HAUS augmin-like complex, subunit 5	213054_at	23354	AA845355	1	-0.4	0.042
HAUS6	HAUS augmin-like complex, subunit 6	218602_s_at	54801	NM_017645	1	-0.7	0.016
HAUS6	HAUS augmin-like complex, subunit 6	222685_at	54801	AB046794	1	-0.5	0.0061
HAVCR1	hepatitis A virus cellular receptor 1	207052_at	26762	NM_012206	1	-0.5	0.012
HCG18	HLA complex group 18 (non-protein coding)	242618_at	414777	AA430072	1	-0.5	0.024
HCRT	hypocretin (orexin) neuropeptide precursor	207642_at	3060	NM_001524	1	0.4	0.031
HDAC9	histone deacetylase 9	1552758_at	9734	NM_058176	1	0.4	0.023
HDAC9	histone deacetylase 9	1552760_at	9734	BM726008	1	0.3	0.026
HDAC9	histone deacetylase 9	234393_at	9734	AC004744	1	0.3	0.038
HDGFRP3	hepatoma-derived growth factor, related protein 3	1558102_at	50810	AK055438	1	-0.5	0.0058
HDGFRP3	hepatoma-derived growth factor, related protein 3	1558103_a_at	50810	AK055438	1	-0.6	0.014
HDHD2	haloacid dehalogenase-like hydrolase domain containing 2	223155_at	84064	AL136681	1	-0.3	0.04
HEATR2	HEAT repeat containing 2	1554761_a_at	54919	BC010850	1	-0.3	0.032
HEATR5B	HEAT repeat containing 5B	233642_s_at	54497	AK001513	1	-0.3	0.032
HECA	headcase homolog (Drosophila)	218603_at	51696	NM_016217	1	-0.3	0.043
HELLS	helicase, lymphoid-specific	220085_at	3070	NM_018063	1	-0.6	0.0076
HELLS	helicase, lymphoid-specific	227350_at	3070	AI889959	1	-0.8	0.0016
HERC1	HECT and RLD domain containing E3 ubiquitin protein ligase family member 1	240703_s_at	8925	AW591969	1	-0.4	0.025
HERC2	HECT and RLD domain containing E3 ubiquitin protein ligase 2	217902_s_at	8924	NM_004667	1	-0.5	0.03
HERC6	HECT and RLD domain containing E3 ubiquitin protein ligase family member 6	219352_at	55008	NM_017912	1	-0.3	0.03
HERPUD2	HERPUD family member 2	1558699_a_at	64224	BG249246	1	-0.4	0.018
HERPUD2	HERPUD family member 2	222751_at	64224	AA536012	1	-0.4	0.032
HFE	hemochromatosis	214647_s_at	3077	BG402460	1	-0.3	0.042
HFM1	HFM1, ATP-dependent DNA helicase homolog (S. cerevisiae)	1564285_at	164045	AK096330	1	0.3	0.032
HHAT	hedgehog acyltransferase	219687_at	55733	NM_018194	1	-0.5	0.013
HHIP	hedgehog interacting protein	237466_s_at	64399	AW444502	1	0.7	0.02
HIBADH	3-hydroxyisobutyrate dehydrogenase	224812_at	11112	AL577446	1	-0.3	0.047
HIBADH	3-hydroxyisobutyrate dehydrogenase	231955_s_at	11112	AC007130	1	-0.4	0.041
HIP1	huntingtin interacting protein 1	226364_at	3092	AU145049	1	-0.4	0.022
HIPK2	homeodomain interacting protein kinase 2	225368_at	28996	BF218115	1	-0.4	0.017
HIRIP3	HIRA interacting protein 3	204504_s_at	8479	NM_003609	1	-0.5	0.01
HIST1H1T	histone cluster 1, H1t	207982_at	3010	NM_005323	1	0.6	0.0024
HIST1H2AD /// HIST1H3A /// HIST1H3B /// HIST1H3C /// HIST1H3D /// HIST1H3E /// HIST1H3F /// HIST1H3G /// HIST1H3H /// HIST1H3I /// HIST1H3J	histone cluster 1, H2ad /// histone cluster 1, H3a /// histone cluster 1, H3b /// histone cluster 1, H3c /// histone cluster 1, H3d /// histone cluster 1, H3e /// histone cluster 1, H3f /// histone cluster 1, H3g /// histone cluster 1, H3h /// histone cluster 1, H3i /// histone cluster 1, H3j	214472_at	3013 /// 8350 /// 8351 /// 8352 /// 8353 /// 8354 /// 8355 /// 8356 /// 8357 /// 8358 /// 8968	NM_003530	1	0.5	0.034
HIST1H2BG /// HIST1H2BJ	histone cluster 1, H2bg /// histone cluster 1, H2bj	210387_at	8339 /// 8970	BC001131	1	1	0.00041
HIST1H2BG /// HIST1H2BJ	histone cluster 1, H2bg /// histone cluster 1, H2bj	215779_s_at	8339 /// 8970	BE271470	1	0.4	0.025
HIST1H4F /// HIST1H4G	histone cluster 1, H4f /// histone cluster 1, H4g	208026_at	8361 /// 8369	NM_003540	1	0.3	0.037
HJURP	Holliday junction recognition protein	218726_at	55355	NM_018410	1	-0.5	0.0093
HKDC1	hexokinase domain containing 1	227614_at	80201	W81116	1	-0.3	0.026
HMCES	5-hydroxymethylcytosine (hmC) binding, ES cell-specific	201677_at	56941	AI937543	1	-0.3	0.046
HMG20B	high mobility group 20B	209113_s_at	10362	AF288679	1	-0.4	0.049
HMG20B	high mobility group 20B	210719_s_at	10362	BC002552	1	-0.4	0.021
HMGB1	high mobility group box 1	214938_x_at	3146	AF283771	1	-0.3	0.048
HMGB1	high mobility group box 1	224734_at	3146	N92507	1	-0.4	0.02
HMGB2	high mobility group box 2	208808_s_at	3148	BC000903	1	-0.6	0.0039
HMGB3	high mobility group box 3	203744_at	3149	NM_005342	1	-0.3	0.032
HMGB3	high mobility group box 3	225601_at	3149	AI806853	1	-0.5	0.0057
HMGN5	high mobility group nucleosome binding domain 5	221238_at	79366	NM_030763	1	-0.4	0.025
HMGN5	high mobility group nucleosome binding domain 5	221606_s_at	79366	BC005342	1	-0.4	0.022
HN1L	hematological and neurological expressed 1-like	212109_at	90861	AI590869	1	-0.4	0.013
HNRNPA3	heterogeneous nuclear ribonucleoprotein A3	211932_at	220988	BF195526	1	-0.3	0.04
HNRNPD	heterogeneous nuclear ribonucleoprotein D (AU-rich element RNA binding protein 1, 37kDa)	200073_s_at	3184	M94630	1	-0.4	0.018
HNRNPD	heterogeneous nuclear ribonucleoprotein D (AU-rich element RNA binding protein 1, 37kDa)	209330_s_at	3184	D55674	1	-0.4	0.028
HNRNPD	heterogeneous nuclear ribonucleoprotein D (AU-rich element RNA binding protein 1, 37kDa)	221481_x_at	3184	D55672	1	-0.3	0.041
HNRNPD	heterogeneous nuclear ribonucleoprotein D (AU-rich element RNA binding protein 1, 37kDa)	229129_at	3184	AI948456	1	-0.4	0.033
HNRNPL	heterogeneous nuclear ribonucleoprotein L	202072_at	3191	NM_001533	1	-0.3	0.046
HNRNPM	heterogeneous nuclear ribonucleoprotein M	1555844_s_at	4670	AL713781	1	-0.4	0.018
HNRNPM	heterogeneous nuclear ribonucleoprotein M	200072_s_at	4670	AF061832	1	-0.4	0.028
HNRNPU	heterogeneous nuclear ribonucleoprotein U (scaffold attachment factor A)	225805_at	3192	AW137669	1	-0.5	0.0044
HNRNPUL2	heterogeneous nuclear ribonucleoprotein U-like 2	225405_at	221092	AI151434	1	-0.4	0.023
HOGA1	4-hydroxy-2-oxoglutarate aldolase 1	239093_at	112817	BG165743	1	-0.3	0.045
HOOK1	hook microtubule-tethering protein 1	225792_at	51361	AA618420	1	-0.3	0.03
HOOK3	hook microtubule-tethering protein 3	236192_at	84376	BF447112	1	-0.4	0.04
HOTTIP	HOXA distal transcript antisense RNA	1564069_at	100316868	AK093987	1	0.4	0.036
HOXD3 /// HOXD4 /// LOC401021	homeobox D3 /// homeobox D4 /// uncharacterized LOC401021	206601_s_at	3232 /// 3233 /// 401021	BC005124	1	0.4	0.017
HP1BP3	heterochromatin protein 1, binding protein 3	1554251_at	50809	BC022342	1	-0.4	0.024
HP1BP3	heterochromatin protein 1, binding protein 3	224591_at	50809	AK023129	1	-0.3	0.036
HPSE	heparanase	219403_s_at	10855	NM_006665	1	-0.4	0.027
HRAS	Harvey rat sarcoma viral oncogene homolog	212983_at	3265	NM_005343	1	-0.5	0.011
HRASLS	HRAS-like suppressor	219983_at	57110	NM_020386	1	-0.4	0.033
HRASLS	HRAS-like suppressor	219984_s_at	57110	NM_020386	1	-0.5	0.016
HS2ST1	heparan sulfate 2-O-sulfotransferase 1	203285_s_at	9653	NM_012262	1	-0.6	0.0019
HS2ST1	heparan sulfate 2-O-sulfotransferase 1	230465_at	9653	AI806674	1	-0.6	0.0073
HSD17B2	hydroxysteroid (17-beta) dehydrogenase 2	204818_at	3294	NM_002153	1	-0.4	0.038
HSPA14	heat shock 70kDa protein 14	226887_at	51182	AL138384	1	-0.3	0.046
HSPA2	heat shock 70kDa protein 2	211538_s_at	3306	U56725	1	-0.5	0.014
HSPA4L	heat shock 70kDa protein 4-like	1556194_a_at	22824	BC042959	1	-0.4	0.031
HSPA6	heat shock 70kDa protein 6 (HSP70B')	117_at	3310	X51757	1	1.1	6e-05
HSPA6	heat shock 70kDa protein 6 (HSP70B')	213418_at	3310	NM_002155	1	2	8.7e-07
HSPA9	heat shock 70kDa protein 9 (mortalin)	200691_s_at	3313	BC000478	1	-0.4	0.024
HTATSF1	HIV-1 Tat specific factor 1	202602_s_at	27336	NM_014500	1	-0.3	0.04
HYI	hydroxypyruvate isomerase (putative)	223622_s_at	81888	AF284751	1	-0.3	0.043
ICE2	interactor of little elongator complex ELL subunit 2	228960_at	79664	AW105285	1	-0.3	0.039
ICE2	interactor of little elongator complex ELL subunit 2	242639_at	79664	AW340004	1	-0.3	0.042
ID2 /// ID2B	inhibitor of DNA binding 2, dominant negative helix-loop-helix protein /// inhibitor of DNA binding 2B, dominant negative helix-loop-helix protein (pseudogene)	213931_at	3398 /// 84099	AI819238	1	-0.5	0.009
IDH2	isocitrate dehydrogenase 2 (NADP+), mitochondrial	210045_at	3418	AU151428	1	-0.5	0.01
IDH2	isocitrate dehydrogenase 2 (NADP+), mitochondrial	210046_s_at	3418	U52144	1	-0.4	0.02
IDH3B	isocitrate dehydrogenase 3 (NAD+) beta	210418_s_at	3420	AF023265	1	-0.4	0.026
IDH3G	isocitrate dehydrogenase 3 (NAD+) gamma	202471_s_at	3421	NM_004135	1	-0.4	0.029
IFI6	interferon, alpha-inducible protein 6	204415_at	2537	NM_022873	1	-0.8	0.0044
IFNB1	interferon, beta 1, fibroblast	208173_at	3456	NM_002176	1	0.5	0.0088
IFNL2	interferon, lambda 2	1552915_at	282616	NM_172138	1	0.5	0.011
IFNL2 /// IFNL3	interferon, lambda 2 /// interferon, lambda 3	1552609_s_at	282616 /// 282617	NM_172139	1	0.4	0.025
IFNLR1	interferon, lambda receptor 1	244261_at	163702	AW340139	1	-0.4	0.038
IFT74	intraflagellar transport 74 homolog (Chlamydomonas)	219174_at	80173	NM_025103	1	-0.5	0.025
IFT80	intraflagellar transport 80 homolog (Chlamydomonas)	1558956_s_at	57560	AI473255	1	-0.6	0.007
IFT80	intraflagellar transport 80 homolog (Chlamydomonas)	226098_at	57560	AB037795	1	-0.5	0.029
IFT81	intraflagellar transport 81 homolog (Chlamydomonas)	219372_at	28981	NM_014055	1	-0.5	0.018
IGF1R	insulin-like growth factor 1 receptor	203628_at	3480	H05812	1	-0.4	0.028
IGF1R	insulin-like growth factor 1 receptor	225330_at	3480	AL044092	1	-0.4	0.037
IGF2BP2	insulin-like growth factor 2 mRNA binding protein 2	223963_s_at	10644	AF117107	1	0.5	0.022
IGFBP1	insulin-like growth factor binding protein 1	205302_at	3484	NM_000596	1	-0.4	0.037
IGFBP5	insulin-like growth factor binding protein 5	1555997_s_at	3488	BM128432	1	0.4	0.036
IGH /// IGHA1 /// IGHG1 /// IGHG2 /// IGHG3 /// IGHM /// LOC102725526	immunoglobulin heavy locus /// immunoglobulin heavy constant alpha 1 /// immunoglobulin heavy constant gamma 1 (G1m marker) /// immunoglobulin heavy constant gamma 2 (G2m marker) /// immunoglobulin heavy constant gamma 3 (G3m marker) /// immunoglobulin heavy constant mu /// uncharacterized LOC102725526	211646_at	3492 /// 3493 /// 3500 /// 3501 /// 3502 /// 3507 /// 102725526	L14453	1	0.3	0.044
IGHA1 /// IGHG1 /// IGHG3 /// IGHM /// IGHV4-31	immunoglobulin heavy constant alpha 1 /// immunoglobulin heavy constant gamma 1 (G1m marker) /// immunoglobulin heavy constant gamma 3 (G3m marker) /// immunoglobulin heavy constant mu /// immunoglobulin heavy variable 4-31	217360_x_at	3493 /// 3500 /// 3502 /// 3507 /// 28396	AJ275408	1	0.4	0.03
IGK /// IGKC	immunoglobulin kappa locus /// immunoglobulin kappa constant	217145_at	3514 /// 50802	AF103574	1	0.4	0.045
IGLV6-57	immunoglobulin lambda variable 6-57	215035_at	28778	AI952772	1	0.5	0.0061
IKBIP	IKBKB interacting protein	227295_at	121457	AW182575	1	-0.5	0.0044
IKZF3	IKAROS family zinc finger 3 (Aiolos)	221092_at	22806	NM_012481	1	0.5	0.017
IKZF3	IKAROS family zinc finger 3 (Aiolos)	236301_at	22806	AA789123	1	0.5	0.0088
IL16	interleukin 16	1555016_at	3603	BC040272	1	0.3	0.049
IL1A	interleukin 1, alpha	210118_s_at	3552	M15329	1	1.2	8.6e-05
IL1R1	interleukin 1 receptor, type I	202948_at	3554	NM_000877	1	-0.3	0.031
IL1RAP	interleukin 1 receptor accessory protein	210233_at	3556	AF167343	1	-0.4	0.046
IL20	interleukin 20	224071_at	50604	AF224266	1	0.4	0.027
IL20RB	interleukin 20 receptor beta	228575_at	53833	AL578102	1	-0.4	0.043
IL32	interleukin 32	203828_s_at	9235	NM_004221	1	0.4	0.019
IL6	interleukin 6	205207_at	3569	NM_000600	1	0.7	0.00041
ILF3-AS1	ILF3 antisense RNA 1 (head to head)	235014_at	147727	BF345728	1	-0.5	0.01
IMPA2	inositol(myo)-1(or 4)-monophosphatase 2	203126_at	3613	NM_014214	1	-0.3	0.037
IMPACT	impact RWD domain protein	218637_at	55364	NM_018439	1	-0.7	0.0012
INHBA	inhibin, beta A	210511_s_at	3624	M13436	1	0.7	0.026
INHBA	inhibin, beta A	227140_at	3624	AI343467	1	0.5	0.0092
INO80B /// INO80B-WBP1	INO80 complex subunit B /// INO80B-WBP1 readthrough (NMD candidate)	65133_i_at	83444 /// 100532735	AI862454	1	-0.5	0.01
INPP4A	inositol polyphosphate-4-phosphatase, type I, 107kDa	227087_at	3631	AA126419	1	-0.4	0.018
INPP4B	inositol polyphosphate-4-phosphatase, type II, 105kDa	205376_at	8821	NM_003866	1	-0.3	0.036
INPP4B	inositol polyphosphate-4-phosphatase, type II, 105kDa	223878_at	8821	BC005273	1	-0.4	0.034
INPP4B	inositol polyphosphate-4-phosphatase, type II, 105kDa	235046_at	8821	AA456099	1	-0.3	0.034
INTS3	integrator complex subunit 3	211132_at	65123	AF130066	1	0.3	0.029
INTS7	integrator complex subunit 7	218783_at	25896	AL133049	1	-0.4	0.031
IPO9	importin 9	213785_at	55705	AW269792	1	-0.4	0.024
IPO9	importin 9	244703_x_at	55705	AA444166	1	-0.5	0.025
IQGAP2	IQ motif containing GTPase activating protein 2	203474_at	10788	NM_006633	1	-0.3	0.037
IQGAP3	IQ motif containing GTPase activating protein 3	1569062_s_at	128239	BC033549	1	-0.4	0.031
IQGAP3	IQ motif containing GTPase activating protein 3	229538_s_at	128239	AW271106	1	-0.9	0.0019
IRAK2	interleukin-1 receptor-associated kinase 2	1553739_at	3656	NM_001570	1	0.4	0.023
IRAK3	interleukin-1 receptor-associated kinase 3	213817_at	11213	AL049435	1	-0.6	0.0091
IRGQ	immunity-related GTPase family, Q	242183_at	126298	AL134428	1	-0.4	0.022
IRS1	insulin receptor substrate 1	242979_at	3667	AI474666	1	-0.5	0.033
ISG20L2	interferon stimulated exonuclease gene 20kDa-like 2	212766_s_at	81875	AW294587	1	-0.3	0.045
ISL2	ISL LIM homeobox 2	232352_at	64843	AK001022	1	0.4	0.031
ITCH	itchy E3 ubiquitin protein ligase	235057_at	83737	AW089307	1	-0.5	0.023
ITCH	itchy E3 ubiquitin protein ligase	236235_at	83737	AA868238	1	-0.3	0.039
ITGA1	integrin, alpha 1	226731_at	3672	AA156873	1	-0.5	0.049
ITGA9-AS1	ITGA9 antisense RNA 1	1563635_at	101928153	BC040563	1	0.3	0.044
ITGB5	integrin, beta 5	214020_x_at	3693	BE138575	1	-0.5	0.016
IVNS1ABP	influenza virus NS1A binding protein	201362_at	10625	AF205218	1	-0.4	0.047
IVNS1ABP	influenza virus NS1A binding protein	201363_s_at	10625	AB020657	1	-0.4	0.037
IYD	iodotyrosine deiodinase	231070_at	389434	BF431199	1	-0.5	0.041
JAK1	Janus kinase 1	201648_at	3716	AL039831	1	-0.3	0.044
JMY	junction mediating and regulatory protein, p53 cofactor	226352_at	133746	BF447037	1	-0.4	0.028
JPH1	junctophilin 1	229139_at	56704	AI202201	1	-0.5	0.013
JPH3	junctophilin 3	243679_at	57338	AI680727	1	0.4	0.032
JUN	jun proto-oncogene	201464_x_at	3725	BG491844	1	1.3	1.7e-06
JUN	jun proto-oncogene	201465_s_at	3725	BC002646	1	1.5	2.7e-06
JUN	jun proto-oncogene	201466_s_at	3725	NM_002228	1	0.9	6e-05
JUN	jun proto-oncogene	213281_at	3725	BE327172	1	1.5	1.4e-06
JUNB	jun B proto-oncogene	201473_at	3726	NM_002229	1	0.3	0.042
JUND	jun D proto-oncogene	203752_s_at	3727	NM_005354	1	-0.4	0.024
KATNA1	katanin p60 (ATPase containing) subunit A 1	205526_s_at	11104	NM_007044	1	-0.3	0.044
KATNB1	katanin p80 (WD repeat containing) subunit B 1	203163_at	10300	NM_005886	1	-0.4	0.034
KBTBD6	kelch repeat and BTB (POZ) domain containing 6	226479_at	89890	AL359577	1	-0.4	0.048
KBTBD7	kelch repeat and BTB (POZ) domain containing 7	223412_at	84078	AL136782	1	-0.4	0.034
KCMF1	potassium channel modulatory factor 1	242887_at	56888	AI221300	1	-0.6	0.018
KCND3	potassium voltage-gated channel, Shal-related subfamily, member 3	211827_s_at	3752	AF187964	1	0.4	0.023
KCNIP2-AS1	KCNIP2 antisense RNA 1	237266_at	100289509	BE552347	1	0.4	0.027
KCNIP4	Kv channel interacting protein 4	224530_s_at	80333	AY029176	1	0.3	0.044
KCNJ1	potassium inwardly-rectifying channel, subfamily J, member 1	210403_s_at	3758	U12543	1	0.4	0.029
KCNK3	potassium channel, subfamily K, member 3	205952_at	3777	NM_002246	1	0.4	0.025
KCNQ2	potassium voltage-gated channel, KQT-like subfamily, member 2	205737_at	3785	NM_004518	1	0.4	0.023
KCTD3	potassium channel tetramerization domain containing 3	217894_at	51133	NM_016121	1	-0.4	0.028
KCTD5	potassium channel tetramerization domain containing 5	222645_s_at	54442	AA872593	1	-0.3	0.037
KCTD9	potassium channel tetramerization domain containing 9	218823_s_at	54793	NM_017634	1	-0.3	0.048
KDM5A	lysine (K)-specific demethylase 5A	202040_s_at	5927	NM_005056	1	-0.3	0.05
KDM6B	lysine (K)-specific demethylase 6B	41386_i_at	23135	AB002344	1	0.4	0.029
KDSR	3-ketodihydrosphingosine reductase	1558279_a_at	2531	BF666293	1	-0.7	0.012
KDSR	3-ketodihydrosphingosine reductase	202419_at	2531	NM_002035	1	-0.4	0.02
KDSR	3-ketodihydrosphingosine reductase	229850_at	2531	N30152	1	-0.8	0.012
KHK	ketohexokinase (fructokinase)	205175_s_at	3795	NM_000221	1	0.4	0.027
KHSRP	KH-type splicing regulatory protein	204372_s_at	8570	NM_003685	1	-0.4	0.023
KIAA0101	KIAA0101	202503_s_at	9768	NM_014736	1	-0.3	0.038
KIAA0141	KIAA0141	227056_at	9812	AA181172	1	-0.4	0.016
KIAA0319L	KIAA0319-like	222468_at	79932	W58365	1	-0.3	0.044
KIAA0368	KIAA0368	212428_at	23392	AW001101	1	-0.3	0.042
KIAA0368	KIAA0368	214356_s_at	23392	AI272899	1	-0.3	0.046
KIAA0430	KIAA0430	202386_s_at	9665	NM_019081	1	-0.5	0.021
KIAA1191	KIAA1191	224502_s_at	57179	BC006316	1	-0.3	0.048
KIAA1211	KIAA1211	227230_s_at	57482	BE855799	1	-0.5	0.012
KIAA1211	KIAA1211	227231_at	57482	AI991996	1	-0.5	0.018
KIAA1279	KIAA1279	212453_at	26128	AB033105	1	-0.4	0.01
KIAA1456 /// LOC101927137	KIAA1456 /// uncharacterized LOC101927137	239297_at	57604 /// 101927137	BE932011	1	0.6	0.0067
KIAA1598	KIAA1598	221802_s_at	57698	AU157109	1	-0.3	0.048
KIAA1661	KIAA1661 protein	215943_at	85375	AB051448	1	0.5	0.02
KIAA1731	KIAA1731	215018_at	85459	AB051518	1	0.4	0.014
KIAA2022	KIAA2022	244370_at	340533	AI743137	1	0.4	0.026
KIDINS220	kinase D-interacting substrate, 220kDa	212163_at	57498	AB033076	1	-0.3	0.033
KIF11	kinesin family member 11	204444_at	3832	NM_004523	1	-0.7	0.0032
KIF13B	kinesin family member 13B	202962_at	23303	NM_015254	1	-0.4	0.024
KIF14	kinesin family member 14	206364_at	9928	NM_014875	1	-0.6	0.011
KIF14	kinesin family member 14	236641_at	9928	AW183154	1	-0.8	0.00098
KIF15	kinesin family member 15	219306_at	56992	NM_020242	1	-0.4	0.016
KIF18B	kinesin family member 18B	222039_at	146909	AA292789	1	-0.4	0.026
KIF1B	kinesin family member 1B	209234_at	23095	BF939474	1	-0.4	0.016
KIF20A	kinesin family member 20A	218755_at	10112	NM_005733	1	-0.6	0.011
KIF20B	kinesin family member 20B	205235_s_at	9585	NM_016195	1	-0.3	0.039
KIF22	kinesin family member 22	202183_s_at	3835	NM_007317	1	-0.4	0.034
KIF23	kinesin family member 23	204709_s_at	9493	NM_004856	1	-0.7	0.0067
KIF2C	kinesin family member 2C	209408_at	11004	U63743	1	-0.5	0.0078
KIF2C	kinesin family member 2C	211519_s_at	11004	AY026505	1	-0.5	0.0079
KIF3A	kinesin family member 3A	213623_at	11127	NM_007054	1	-0.5	0.013
KIF4A	kinesin family member 4A	218355_at	24137	NM_012310	1	-0.5	0.0054
KIR2DL2	killer cell immunoglobulin-like receptor, two domains, long cytoplasmic tail, 2	211397_x_at	3803	L76669	1	0.4	0.037
KLC1	kinesin light chain 1	212877_at	3831	AA284075	1	-0.5	0.011
KLC1	kinesin light chain 1	212878_s_at	3831	AA284075	1	-0.4	0.025
KLC1	kinesin light chain 1	213656_s_at	3831	BF593594	1	-0.3	0.025
KLF13	Kruppel-like factor 13	225390_s_at	51621	AL390127	1	-0.4	0.03
KLF9	Kruppel-like factor 9	203543_s_at	687	NM_001206	1	-0.4	0.038
KLHDC4	kelch domain containing 4	221219_s_at	54758	NM_017566	1	-0.3	0.047
KLHL24	kelch-like family member 24	221986_s_at	54800	AW006750	1	-0.5	0.0043
KLHL24	kelch-like family member 24	226158_at	54800	AL120021	1	-0.7	0.0069
KLHL31	kelch-like family member 31	234782_at	401265	AL157773	1	0.3	0.046
KLHL36	kelch-like family member 36	227319_at	79786	AI693862	1	-0.3	0.045
KLHL5	kelch-like family member 5	227565_at	51088	BE501881	1	-0.5	0.031
KLRC4-KLRK1 /// KLRK1	KLRC4-KLRK1 readthrough /// killer cell lectin-like receptor subfamily K, member 1	205821_at	22914 /// 100528032	NM_007360	1	0.4	0.015
KMO	kynurenine 3-monooxygenase (kynurenine 3-hydroxylase)	205306_x_at	8564	AI074145	1	0.4	0.024
KMT2D	lysine (K)-specific methyltransferase 2D	227527_at	8085	AI394529	1	-0.4	0.035
KNTC1	kinetochore associated 1	206316_s_at	9735	NM_014708	1	-0.5	0.0068
KPNA4	karyopherin alpha 4 (importin alpha 3)	213567_at	3840	BF431965	1	-0.5	0.022
KPNA6	karyopherin alpha 6 (importin alpha 7)	226976_at	23633	D55880	1	-0.5	0.015
KRCC1	lysine-rich coiled-coil 1	218303_x_at	51315	NM_016618	1	0.4	0.026
KRIT1	KRIT1, ankyrin repeat containing	216713_at	889	AL049325	1	-0.4	0.016
KRIT1	KRIT1, ankyrin repeat containing	34031_i_at	889	U90269	1	-0.9	0.00036
KRT5	keratin 5	201820_at	3852	NM_000424	1	0.3	0.033
KRT6A /// KRT6B /// KRT6C	keratin 6A /// keratin 6B /// keratin 6C	214580_x_at	3853 /// 3854 /// 286887	AL569511	1	0.3	0.037
KRT7	keratin 7	214031_s_at	3855	AI920979	1	0.4	0.041
KRT8P12	keratin 8 pseudogene 12	230116_at	90133	AL133645	1	0.4	0.026
LACC1	laccase (multicopper oxidoreductase) domain containing 1	228937_at	144811	AI659800	1	-0.3	0.036
LACTB	lactamase, beta	1552486_s_at	114294	NM_171846	1	-0.4	0.041
LACTB2	lactamase, beta 2	218701_at	51110	NM_016027	1	-0.3	0.04
LAMA3	laminin, alpha 3	203726_s_at	3909	NM_000227	1	-0.3	0.046
LAMA4	laminin, alpha 4	202202_s_at	3910	NM_002290	1	-0.4	0.026
LAMB1	laminin, beta 1	201505_at	3912	NM_002291	1	-0.6	0.004
LAMB1	laminin, beta 1	211651_s_at	3912	M20206	1	-0.3	0.031
LAMB2	laminin, beta 2 (laminin S)	216264_s_at	3913	X79683	1	-0.5	0.016
LAMP1	lysosomal-associated membrane protein 1	201551_s_at	3916	J03263	1	-0.4	0.027
LAMP1	lysosomal-associated membrane protein 1	201552_at	3916	NM_005561	1	-0.4	0.026
LAMP2	lysosomal-associated membrane protein 2	226671_at	3920	AI150000	1	-0.6	0.01
LANCL1	LanC lantibiotic synthetase component C-like 1 (bacterial)	202020_s_at	10314	NM_006055	1	-0.4	0.016
LANCL2	LanC lantibiotic synthetase component C-like 2 (bacterial)	218219_s_at	55915	NM_018697	1	-0.3	0.036
LANCL2	LanC lantibiotic synthetase component C-like 2 (bacterial)	222560_at	55915	AI363001	1	0.4	0.029
LAPTM4B	lysosomal protein transmembrane 4 beta	208029_s_at	55353	NM_018407	1	-0.3	0.037
LARS	leucyl-tRNA synthetase	217810_x_at	51520	NM_020117	1	-0.4	0.038
LARS	leucyl-tRNA synthetase	222428_s_at	51520	D84223	1	-0.4	0.039
LAS1L	LAS1-like (S. cerevisiae)	208117_s_at	81887	NM_031206	1	-0.3	0.047
LBR	lamin B receptor	201795_at	3930	NM_002296	1	-0.4	0.021
LCN8	lipocalin 8	1569614_s_at	138307	BC024235	1	0.3	0.037
LCOR	ligand dependent nuclear receptor corepressor	226520_at	84458	AI831506	1	-0.4	0.024
LCORL	ligand dependent nuclear receptor corepressor-like	240592_at	254251	AI939336	1	-0.4	0.042
LDLRAD3	low density lipoprotein receptor class A domain containing 3	234985_at	143458	AW043782	1	-0.3	0.028
LEMD3	LEM domain containing 3	218604_at	23592	NM_014319	1	-0.3	0.042
LEO1	Leo1, Paf1/RNA polymerase II complex component, homolog (S. cerevisiae)	235096_at	123169	AA074729	1	-0.3	0.042
LEPROT	leptin receptor overlapping transcript	227095_at	54741	AU151151	1	-0.6	0.0025
LETMD1	LETM1 domain containing 1	207170_s_at	25875	NM_015416	1	-0.4	0.029
LIAS	lipoic acid synthetase	214045_at	11019	BF056778	1	-0.5	0.023
LIG1	ligase I, DNA, ATP-dependent	202726_at	3978	NM_000234	1	-0.5	0.0078
LIMK2	LIM domain kinase 2	202193_at	3985	NM_005569	1	-0.4	0.011
LIN28B	lin-28 homolog B (C. elegans)	229349_at	389421	AL039884	1	0.4	0.029
LINC00086 /// LINC00087	long intergenic non-protein coding RNA 86 /// long intergenic non-protein coding RNA 87	227909_at	399668 /// 644596	AI742434	1	-0.3	0.049
LINC00094	long intergenic non-protein coding RNA 94	203245_s_at	266655	BC002791	1	-0.5	0.04
LINC00176	long intergenic non-protein coding RNA 176	233355_at	284739	AL157500	1	0.4	0.035
LINC00265 /// LOC101929038	long intergenic non-protein coding RNA 265 /// uncharacterized LOC101929038	1558423_at	349114 /// 101929038	BE715671	1	0.6	0.0069
LINC00459 /// LINC00459	long intergenic non-protein coding RNA 459 ///	240431_at	-N/A-	T24087	1	0.4	0.03
LINC00470	long intergenic non-protein coding RNA 470	223977_s_at	56651	AF295726	1	0.4	0.036
LINC00493	long intergenic non-protein coding RNA 493	226236_at	388789	BF675218	1	-0.4	0.031
LINC00645	long intergenic non-protein coding RNA 645	1559992_a_at	100505967	BC042069	1	0.4	0.038
LINC00674	long intergenic non-protein coding RNA 674	225055_at	100499466	AV735241	1	-0.3	0.049
LINC00894	long intergenic non-protein coding RNA 894	1569315_s_at	100272228	BC032484	1	0.4	0.043
LINC00929	long intergenic non-protein coding RNA 929	1562972_at	503519	BC038777	1	0.3	0.042
LINC00944	long intergenic non-protein coding RNA 944	1560573_at	387895	BC040060	1	0.3	0.043
LINC01029	long intergenic non-protein coding RNA 1029	1560832_at	101927715	BC016792	1	0.4	0.026
LINC01312	long intergenic non-protein coding RNA 1312	1552900_a_at	154089	NM_153224	1	0.3	0.033
LINC01420	long intergenic non-protein coding RNA 1420	225028_at	550643	AI417268	1	-0.4	0.049
LIPI	lipase, member I	242178_at	149998	AA528339	1	0.4	0.031
LITAF	lipopolysaccharide-induced TNF factor	200706_s_at	9516	NM_004862	1	-0.4	0.028
LIX1L	Lix1 homolog (mouse)-like	235036_at	128077	AA923372	1	-0.3	0.037
LLGL1	lethal giant larvae homolog 1 (Drosophila)	236594_at	3996	AI570526	1	-0.3	0.028
LMBR1	limb development membrane protein 1	222506_at	64327	AF107454	1	-0.4	0.022
LMBR1	limb development membrane protein 1	224036_s_at	64327	AF063592	1	-0.4	0.027
LMBRD2	LMBR1 domain containing 2	226779_at	92255	BF432857	1	-0.4	0.018
LMNB2	lamin B2	216952_s_at	84823	M94363	1	-0.5	0.0078
LMTK2	lemur tyrosine kinase 2	226375_at	22853	AW206440	1	-0.3	0.042
LOC100130741	uncharacterized LOC100130741	215740_at	100130741	AU148808	1	0.5	0.015
LOC100286922	DnaJ (Hsp40) homolog, subfamily B, member 3 pseudogene	230953_at	100286922	AI126471	1	0.4	0.023
LOC100310756	uncharacterized LOC100310756	1556242_a_at	100310756	BC040715	1	-0.4	0.032
LOC100505609	uncharacterized LOC100505609	1558496_at	100505609	BC041442	1	0.9	0.00067
LOC100506122	uncharacterized LOC100506122	1561228_at	100506122	BC042565	1	0.4	0.015
LOC100506388	uncharacterized LOC100506388	238091_at	100506388	AW026243	1	0.3	0.046
LOC100506403 /// LOC101928269 /// RUNX1	uncharacterized LOC100506403 /// uncharacterized LOC101928269 /// runt-related transcription factor 1	237697_at	861 /// 100506403 /// 101928269	AW592261	1	0.3	0.032
LOC100506990	uncharacterized LOC100506990	227917_at	100506990	AW192692	1	-0.4	0.036
LOC100507389	uncharacterized LOC100507389	1556388_a_at	100507389	AK096143	1	0.3	0.049
LOC100507520	uncharacterized LOC100507520	236553_at	100507520	AW081685	1	0.4	0.04
LOC100996643 /// LOC101928195 /// MTHFD1L	monofunctional C1-tetrahydrofolate synthase, mitochondrial-like /// monofunctional C1-tetrahydrofolate synthase, mitochondrial-like /// methylenetetrahydrofolate dehydrogenase (NADP+ dependent) 1-like	225520_at	25902 /// 100996643 /// 101928195	AL133260	1	-0.3	0.038
LOC100996717 /// LOC100996763 /// LOC101929796 /// NOTCH2 /// NOTCH2NL	neurogenic locus notch homolog protein 2-like /// neurogenic locus notch homolog protein 2-like /// neurogenic locus notch homolog protein 2-like /// notch 2 /// notch 2 N-terminal like	227067_x_at	4853 /// 388677 /// 100996717 /// 100996763 /// 101929796	AW024960	1	-0.4	0.015
LOC100996724 /// LOC100996761 /// LOC101929792 /// LOC101930416 /// PDE4DIP	phosphodiesterase 4D interacting protein-like /// uncharacterized LOC100996761 /// uncharacterized LOC101929792 /// myomegalin-like /// phosphodiesterase 4D interacting protein	214130_s_at	9659 /// 100996724 /// 100996761 /// 101929792 /// 101930416	AI821791	1	-0.3	0.034
LOC101060363 /// PPIA	peptidyl-prolyl cis-trans isomerase A-like /// peptidylprolyl isomerase A (cyclophilin A)	226336_at	5478 /// 101060363	T62044	1	-0.4	0.012
LOC101593348	uncharacterized LOC101593348	243272_at	101593348	AW663447	1	0.4	0.022
LOC101927027	uncharacterized LOC101927027	228620_at	101927027	AW664056	1	-0.5	0.042
LOC101927089	uncharacterized LOC101927089	240880_at	101927089	AA776739	1	0.3	0.04
LOC101927095	uncharacterized LOC101927095	1562965_at	101927095	BC042078	1	0.4	0.046
LOC101927204	uncharacterized LOC101927204	244749_at	101927204	AA806349	1	-0.5	0.019
LOC101927253	uncharacterized LOC101927253	1559948_at	101927253	AK000454	1	0.4	0.022
LOC101927263	uncharacterized LOC101927263	236396_at	101927263	AW051952	1	-0.3	0.044
LOC101927286	uncharacterized LOC101927286	1562720_at	101927286	BC038379	1	0.4	0.023
LOC101927379	uncharacterized LOC101927379	1562801_at	101927379	BC043373	1	0.4	0.022
LOC101927494	uncharacterized LOC101927494	1561525_at	101927494	BC035252	1	0.3	0.04
LOC101927933 /// LRRC8C	uncharacterized LOC101927933 /// leucine rich repeat containing 8 family, member C	228314_at	84230 /// 101927933	BE877357	1	-0.4	0.02
LOC101928087	uncharacterized LOC101928087	241767_at	101928087	AI184581	1	0.4	0.043
LOC101928274 /// VSIG10	uncharacterized LOC101928274 /// V-set and immunoglobulin domain containing 10	220137_at	54621 /// 101928274	NM_019086	1	-0.3	0.047
LOC101928553	uncharacterized LOC101928553	1562710_at	101928553	BC043586	1	0.4	0.035
LOC101928580	uncharacterized LOC101928580	1562044_at	101928580	BC039366	1	0.3	0.047
LOC101928731	uncharacterized LOC101928731	242638_at	101928731	AA045088	1	0.5	0.0099
LOC101928973	uncharacterized LOC101928973	1561044_at	101928973	BC039493	1	0.4	0.042
LOC101929036 /// PAH	uncharacterized LOC101929036 /// phenylalanine hydroxylase	205719_s_at	5053 /// 101929036	NM_000277	1	-0.7	0.0052
LOC101929125	uncharacterized LOC101929125	1559252_a_at	101929125	BC042140	1	0.3	0.04
LOC101929147	uncharacterized LOC101929147	1562474_at	101929147	BC043601	1	-0.3	0.044
LOC101929240 /// SNRNP200	U5 small nuclear ribonucleoprotein 200 kDa helicase-like /// small nuclear ribonucleoprotein 200kDa (U5)	200058_s_at	23020 /// 101929240	BC001417	1	-0.4	0.023
LOC101929336 /// RIF1	uncharacterized LOC101929336 /// replication timing regulatory factor 1	214700_x_at	55183 /// 101929336	AK000323	1	-0.4	0.035
LOC101929336 /// RIF1	uncharacterized LOC101929336 /// replication timing regulatory factor 1	226503_at	55183 /// 101929336	BE504653	1	-0.4	0.014
LOC101929336 /// RIF1	uncharacterized LOC101929336 /// replication timing regulatory factor 1	226821_at	55183 /// 101929336	R41296	1	-0.4	0.02
LOC101929373 /// SLC9B1	sodium/hydrogen exchanger 9B1-like /// solute carrier family 9, subfamily B (NHA1, cation proton antiporter 1), member 1	1553633_s_at	150159 /// 101929373	NM_139173	1	0.3	0.045
LOC101929683	uncharacterized LOC101929683	234345_at	101929683	AL157439	1	0.4	0.029
LOC101930097	uncharacterized LOC101930097	242278_at	101930097	BE783671	1	0.4	0.048
LOC101930149 /// LOC101930286	uncharacterized LOC101930149 /// uncharacterized LOC101930286	1568921_at	101930149 /// 101930286	BC035181	1	0.4	0.022
LOC102723831	uncharacterized LOC102723831	1569849_at	102723831	BC031960	1	0.4	0.03
LOC102724200 /// TRAPPC10	trafficking protein particle complex subunit 10-like /// trafficking protein particle complex 10	209412_at	7109 /// 102724200	U61500	1	-0.5	0.013
LOC102724870	uncharacterized LOC102724870	224375_at	102724870	AF271776	1	0.6	0.031
LOC113230 /// MIR1199	uncharacterized protein LOC113230 /// microRNA 1199	1558412_at	113230 /// 102466515	BC011002	1	0.3	0.041
LOC150776 /// SMPD4	sphingomyelin phosphodiesterase 4, neutral membrane (neutral sphingomyelinase-3) pseudogene /// sphingomyelin phosphodiesterase 4, neutral membrane (neutral sphingomyelinase-3)	207856_s_at	55627 /// 150776	NM_017951	1	-0.4	0.02
LOC153682	uncharacterized LOC153682	232794_at	153682	AL137383	1	-0.3	0.03
LOC158402	uncharacterized LOC158402	236769_at	158402	BE504242	1	-0.4	0.025
LOC283357	uncharacterized LOC283357	235151_at	283357	AA807060	1	-0.6	0.0016
LOC283484	uncharacterized LOC283484	1556940_at	283484	AW665184	1	0.7	0.0079
LOC283788	FSHD region gene 1 pseudogene	229007_at	283788	N50864	1	-0.5	0.0031
LOC284926	uncharacterized LOC284926	1556064_at	284926	BQ575161	1	-0.4	0.026
LOC285000	uncharacterized LOC285000	240428_at	285000	BF690215	1	0.4	0.02
LOC286238	uncharacterized LOC286238	1564709_at	286238	AK098532	1	0.3	0.049
LOC338620	uncharacterized LOC338620	230930_at	338620	AI435839	1	-0.3	0.037
LOC338963	epididymal protein pseudogene	1563878_a_at	338963	AK093496	1	0.4	0.024
LOC339803	uncharacterized LOC339803	227940_at	339803	N90774	1	-0.6	0.0021
LOC389834	ankyrin repeat domain 57 pseudogene	242577_at	389834	BF109197	1	-0.3	0.042
LOC389906 /// LOC441528	zinc finger protein 839 pseudogene /// uncharacterized LOC441528	1558045_a_at	389906 /// 441528	BC017239	1	-0.4	0.042
LOC439994 /// LOC642361	uncharacterized LOC439994 /// uncharacterized LOC642361	228839_s_at	439994 /// 642361	AA810864	1	-0.4	0.034
LOC642852	uncharacterized LOC642852	1559957_a_at	642852	BG396868	1	-0.6	0.025
LOC645188	uncharacterized LOC645188	1560895_at	645188	BG773235	1	0.4	0.013
LOC646762	uncharacterized LOC646762	1568597_at	646762	CA309468	1	-0.3	0.044
LOC647070	uncharacterized LOC647070	215467_x_at	647070	AK001442	1	-0.3	0.034
LOC728613	programmed cell death 6 pseudogene	1569110_x_at	728613	BC020552	1	-0.7	0.0031
LONRF2	LON peptidase N-terminal domain and ring finger 2	225996_at	164832	AV709727	1	-0.6	0.0071
LOXL1-AS1	LOXL1 antisense RNA 1	232752_at	100287616	AK001164	1	-0.6	0.012
LPAL2	lipoprotein, Lp(a)-like 2, pseudogene	210909_x_at	80350	U19518	1	0.6	0.026
LPCAT2	lysophosphatidylcholine acyltransferase 2	229791_at	54947	N32611	1	0.3	0.045
LPGAT1	lysophosphatidylglycerol acyltransferase 1	1555058_a_at	9926	BC034621	1	-0.5	0.031
LPGAT1	lysophosphatidylglycerol acyltransferase 1	202651_at	9926	NM_014873	1	-0.3	0.049
LPGAT1	lysophosphatidylglycerol acyltransferase 1	227476_at	9926	AW576195	1	-0.6	0.0038
LPIN1	lipin 1	212276_at	23175	D80010	1	-0.3	0.033
LPP	LIM domain containing preferred translocation partner in lipoma	224811_at	4026	BF112093	1	-0.3	0.048
LPP-AS2	LPP antisense RNA 2	1556827_at	339929	BC042414	1	-0.3	0.034
LRBA	LPS-responsive vesicle trafficking, beach and anchor containing	214109_at	987	AI659561	1	-0.4	0.012
LRP12	low density lipoprotein receptor-related protein 12	219631_at	29967	NM_024937	1	-0.4	0.023
LRP12	low density lipoprotein receptor-related protein 12	220253_s_at	29967	NM_013437	1	-0.4	0.018
LRP2	low density lipoprotein receptor-related protein 2	205710_at	4036	NM_004525	1	0.3	0.044
LRP8	low density lipoprotein receptor-related protein 8, apolipoprotein e receptor	228955_at	7804	AL041761	1	-0.3	0.036
LRPAP1	low density lipoprotein receptor-related protein associated protein 1	242705_x_at	4043	AI188104	1	-0.4	0.03
LRPPRC	leucine-rich pentatricopeptide repeat containing	211615_s_at	10128	M92439	1	-0.4	0.023
LRRC17	leucine rich repeat containing 17	205381_at	10234	NM_005824	1	0.4	0.038
LRRC19	leucine rich repeat containing 19	220376_at	64922	NM_022901	1	-0.5	0.0067
LRRC27	leucine rich repeat containing 27	1558483_at	80313	AK098652	1	-0.4	0.023
LRRC28	leucine rich repeat containing 28	1553940_a_at	123355	NM_144598	1	-0.4	0.032
LRRC45	leucine rich repeat containing 45	226253_at	201255	BE965418	1	-0.4	0.029
LRRC47	leucine rich repeat containing 47	212904_at	57470	AB033011	1	-0.3	0.04
LRRC6	leucine rich repeat containing 6	236587_at	23639	AI521902	1	0.3	0.043
LRRC74	leucine rich repeat containing 74	234453_s_at	145497	AF111169	1	0.4	0.042
LRRC75A-AS1 /// SNORD49A /// SNORD49B /// SNORD65	LRRC75A antisense RNA 1 /// small nucleolar RNA, C/D box 49A /// small nucleolar RNA, C/D box 49B /// small nucleolar RNA, C/D box 65	225065_x_at	26800 /// 125144 /// 692087 /// 692106	AI826279	1	0.5	0.022
LRRC8B	leucine rich repeat containing 8 family, member B	212978_at	23507	AU146004	1	-0.3	0.05
LRRFIP1	leucine rich repeat (in FLII) interacting protein 1	215375_x_at	9208	AK023938	1	-0.4	0.035
LSG1	large 60S subunit nuclear export GTPase 1	221536_s_at	55341	AL136897	1	-0.4	0.035
LSM11	LSM11, U7 small nuclear RNA associated	226826_at	134353	AU152993	1	-0.4	0.017
LSM5	LSM5 homolog, U6 small nuclear RNA associated (S. cerevisiae)	202903_at	23658	AU153477	1	-0.4	0.022
LSM5	LSM5 homolog, U6 small nuclear RNA associated (S. cerevisiae)	202904_s_at	23658	NM_012322	1	-0.4	0.05
LTBP3	latent transforming growth factor beta binding protein 3	219922_s_at	4054	NM_021070	1	-0.6	0.0069
LY9	lymphocyte antigen 9	215967_s_at	4063	AL582804	1	0.4	0.017
LYZ	lysozyme	1555745_a_at	4069	U25677	1	-0.9	0.011
LZTFL1	leucine zipper transcription factor-like 1	218437_s_at	54585	NM_020347	1	-0.5	0.013
MAATS1	MYCBP-associated, testis expressed 1	1561430_s_at	89876	BC035248	1	0.4	0.047
MACC1	metastasis associated in colon cancer 1	232151_at	346389	AL359055	1	-0.3	0.042
MACF1	microtubule-actin crosslinking factor 1	215222_x_at	23499	AK023406	1	-0.3	0.046
MAD1L1	MAD1 mitotic arrest deficient-like 1 (yeast)	204857_at	8379	NM_003550	1	-0.4	0.02
MAD2L1	MAD2 mitotic arrest deficient-like 1 (yeast)	203362_s_at	4085	NM_002358	1	-0.4	0.03
MAD2L1	MAD2 mitotic arrest deficient-like 1 (yeast)	236312_at	4085	AA938184	1	-0.4	0.028
MAFF	v-maf avian musculoaponeurotic fibrosarcoma oncogene homolog F	205193_at	23764	NM_012323	1	-0.3	0.042
MAFF	v-maf avian musculoaponeurotic fibrosarcoma oncogene homolog F	36711_at	23764	AL021977	1	-0.4	0.02
MAGED1	melanoma antigen family D, 1	209014_at	9500	AF217963	1	-0.3	0.035
MAGI1	membrane associated guanylate kinase, WW and PDZ domain containing 1	225474_at	9223	AI141556	1	-0.4	0.029
MAGI2-AS3	MAGI2 antisense RNA 3	229480_at	100505881	AI341053	1	0.3	0.044
MALAT1	metastasis associated lung adenocarcinoma transcript 1 (non-protein coding)	223577_x_at	378938	AA827878	1	0.7	0.00053
MALAT1	metastasis associated lung adenocarcinoma transcript 1 (non-protein coding)	228582_x_at	378938	AI475544	1	0.7	0.016
MALAT1	metastasis associated lung adenocarcinoma transcript 1 (non-protein coding)	231735_s_at	378938	NM_014086	1	0.7	0.0015
MAML3	mastermind-like 3 (Drosophila)	242794_at	55534	AI569476	1	-0.4	0.02
MAN1A1	mannosidase, alpha, class 1A, member 1	221760_at	4121	BG287153	1	-0.5	0.02
MAN1A2	mannosidase, alpha, class 1A, member 2	214242_at	10905	AI189305	1	0.3	0.034
MAN1A2	mannosidase, alpha, class 1A, member 2	217921_at	10905	BE543064	1	-0.3	0.048
MAN2A1	mannosidase, alpha, class 2A, member 1	226538_at	4124	AV700323	1	-0.4	0.023
MAN2A1	mannosidase, alpha, class 2A, member 1	235103_at	4124	AA029155	1	-0.4	0.022
MANBAL	mannosidase, beta A, lysosomal-like	224689_at	63905	AL034422	1	-0.3	0.046
MAP3K14	mitogen-activated protein kinase kinase kinase 14	205192_at	9020	NM_003954	1	0.4	0.02
MAP3K4	mitogen-activated protein kinase kinase kinase 4	216199_s_at	4216	AL109942	1	-0.3	0.045
MAP3K5	mitogen-activated protein kinase kinase kinase 5	203837_at	4217	NM_005923	1	-0.4	0.029
MAP4K4	mitogen-activated protein kinase kinase kinase kinase 4	218181_s_at	9448	NM_017792	1	-0.6	0.0028
MAPK1	mitogen-activated protein kinase 1	212271_at	5594	AA195999	1	-0.3	0.036
MAPK12	mitogen-activated protein kinase 12	1556340_at	6300	AK098058	1	0.3	0.044
MAPK1IP1L	mitogen-activated protein kinase 1 interacting protein 1-like	225643_at	93487	AI261542	1	-0.3	0.027
2005-03-01	membrane-associated ring finger (C3HC4) 5	226394_at	54708	BE966193	1	-0.3	0.03
MARCKS	myristoylated alanine-rich protein kinase C substrate	225897_at	4082	AI709406	1	-0.3	0.043
MARVELD3	MARVEL domain containing 3	239350_at	91862	AI420156	1	-0.3	0.028
MASTL	microtubule associated serine/threonine kinase-like	228468_at	84930	BF108964	1	-0.4	0.021
MAVS	mitochondrial antiviral signaling protein	229741_at	57506	AI885294	1	-0.4	0.04
MBD2	methyl-CpG binding domain protein 2	202484_s_at	8932	AF072242	1	-0.4	0.027
MBD4	methyl-CpG binding domain protein 4	214047_s_at	8930	AI913365	1	-0.5	0.0085
MBNL3	muscleblind-like splicing regulator 3	219814_at	55796	NM_018388	1	-0.6	0.004
MBNL3	muscleblind-like splicing regulator 3	229498_at	55796	AI197932	1	-0.4	0.019
MBTD1	mbt domain containing 1	243552_at	54799	AW008914	1	-0.6	0.01
MBTPS1	membrane-bound transcription factor peptidase, site 1	201620_at	8720	NM_003791	1	-0.4	0.028
MCM10	minichromosome maintenance complex component 10	220651_s_at	55388	NM_018518	1	-0.4	0.035
MCM4	minichromosome maintenance complex component 4	212141_at	4173	AA604621	1	-0.3	0.042
MCM4	minichromosome maintenance complex component 4	222036_s_at	4173	AI859865	1	-0.3	0.027
MCM4	minichromosome maintenance complex component 4	222037_at	4173	AI859865	1	-0.4	0.016
MCM5	minichromosome maintenance complex component 5	201755_at	4174	NM_006739	1	-0.5	0.016
MCM5	minichromosome maintenance complex component 5	216237_s_at	4174	AA807529	1	-0.7	0.0017
MCM7	minichromosome maintenance complex component 7	208795_s_at	4176	D55716	1	-0.5	0.012
MCM7	minichromosome maintenance complex component 7	210983_s_at	4176	AF279900	1	-0.6	0.0057
MCM8	minichromosome maintenance complex component 8	224320_s_at	84515	BC005170	1	-0.4	0.021
MCM9	minichromosome maintenance complex component 9	213561_at	254394	BF062335	1	0.4	0.023
MCOLN3	mucolipin 3	229797_at	55283	AI636080	1	-0.4	0.017
MCTP1	multiple C2 domains, transmembrane 1	235740_at	79772	BG250585	1	-0.5	0.012
MCUR1	mitochondrial calcium uniporter regulator 1	220094_s_at	63933	NM_022102	1	-0.4	0.02
MCUR1	mitochondrial calcium uniporter regulator 1	227451_s_at	63933	BF507383	1	-0.4	0.014
MDGA2	MAM domain containing glycosylphosphatidylinositol anchor 2	239935_at	161357	D51315	1	0.3	0.041
MDM1	Mdm1 nuclear protein homolog (mouse)	213761_at	56890	AW664850	1	-0.3	0.038
MDM2	MDM2 proto-oncogene, E3 ubiquitin protein ligase	225160_x_at	4193	AI952357	1	-0.4	0.023
MDM2	MDM2 proto-oncogene, E3 ubiquitin protein ligase	229711_s_at	4193	AA902480	1	-0.5	0.035
MDM4	MDM4, p53 regulator	225740_x_at	4194	AA961420	1	-0.4	0.016
MED13L	mediator complex subunit 13-like	212209_at	23389	AL133033	1	-0.4	0.04
MED14	mediator complex subunit 14	202611_s_at	9282	AI971089	1	-0.5	0.0079
MED16	mediator complex subunit 16	43544_at	10025	AA314406	1	-0.6	0.004
MED22	mediator complex subunit 22	206593_s_at	6837	NM_006752	1	-0.5	0.012
MED23	mediator complex subunit 23	242706_s_at	9439	AW959449	1	-0.4	0.043
MED29	mediator complex subunit 29	225708_at	55588	AI561202	1	-0.5	0.0086
MED7	mediator complex subunit 7	204349_at	9443	BC005250	1	-0.5	0.041
MEF2BNB	MEF2B neighbor	1553978_at	729991	BC010931	1	-0.3	0.043
MELK	maternal embryonic leucine zipper kinase	204825_at	9833	NM_014791	1	-0.5	0.01
MESDC1	mesoderm development candidate 1	1556321_a_at	59274	BQ184262	1	-0.3	0.05
METTL10	methyltransferase like 10	226631_at	399818	C06331	1	-0.5	0.032
METTL14	methyltransferase like 14	241689_at	57721	AA866199	1	-0.3	0.044
METTL21A	methyltransferase like 21A	235931_at	151194	AI332764	1	-0.4	0.014
METTL6	methyltransferase like 6	1553689_s_at	131965	NM_152396	1	-0.3	0.035
MFI2	antigen p97 (melanoma associated) identified by monoclonal antibodies 133.2 and 96.5	235911_at	4241	AI885815	1	-0.3	0.047
MFN2	mitofusin 2	216205_s_at	9927	AK021947	1	-0.3	0.029
MGA	MGA, MAX dimerization protein	212945_s_at	23269	BE502432	1	-0.3	0.04
MGAT4B	mannosyl (alpha-1,3-)-glycoprotein beta-1,4-N-acetylglucosaminyltransferase, isozyme B	224598_at	11282	BF570193	1	-0.4	0.032
MGC24103	uncharacterized MGC24103	232568_at	158295	AU145658	1	0.4	0.027
MGEA5	meningioma expressed antigen 5 (hyaluronidase)	200899_s_at	10724	NM_012215	1	-0.5	0.0058
MGME1	mitochondrial genome maintenance exonuclease 1	225890_at	92667	AI678096	1	-0.4	0.026
MIA3	melanoma inhibitory activity family, member 3	212310_at	375056	D87742	1	-0.5	0.012
MIB1	mindbomb E3 ubiquitin protein ligase 1	224720_at	57534	AW243097	1	-0.5	0.011
MICAL2	microtubule associated monooxygenase, calponin and LIM domain containing 2	212473_s_at	9645	BE965029	1	-0.4	0.014
MIEF1	mitochondrial elongation factor 1	204593_s_at	54471	AA046752	1	-0.4	0.022
MINK1	misshapen-like kinase 1	209241_x_at	50488	AB041926	1	0.3	0.05
MIR143HG /// MIR145	MIR143 host gene (non-protein coding) /// microRNA 145	227183_at	406937 /// 728264	AI417267	1	0.4	0.024
MIR29A /// MIR29B1	microRNA 29a /// microRNA 29b-1	244322_at	407021 /// 407024	AW362008	1	0.3	0.049
MIR4657 /// PURB	microRNA 4657 /// purine-rich element binding protein B	227718_at	5814 /// 100616393	BF337790	1	-0.4	0.038
MIR4680 /// PDCD4	microRNA 4680 /// programmed cell death 4 (neoplastic transformation inhibitor)	212593_s_at	27250 /// 100616113	N92498	1	-0.4	0.028
MIR4691 /// MIR7113 /// NDUFS8	microRNA 4691 /// microRNA 7113 /// NADH dehydrogenase (ubiquinone) Fe-S protein 8, 23kDa (NADH-coenzyme Q reductase)	203189_s_at	4728 /// 100616403 /// 102465669	NM_002496	1	-0.4	0.02
MIR636 /// SRSF2	microRNA 636 /// serine/arginine-rich splicing factor 2	214882_s_at	6427 /// 693221	BG254869	1	-0.4	0.029
MIR6732 /// ZC3H12A	microRNA 6732 /// zinc finger CCCH-type containing 12A	218810_at	80149 /// 102465438	NM_025079	1	0.3	0.028
MIR6778 /// SHMT1	microRNA 6778 /// serine hydroxymethyltransferase 1 (soluble)	209980_s_at	6470 /// 102466733	L23928	1	-0.3	0.042
MIR6836 /// SNX8	microRNA 6836 /// sorting nexin 8	223241_at	29886 /// 102465503	AF121858	1	-0.5	0.014
MIR6836 /// SNX8	microRNA 6836 /// sorting nexin 8	228231_at	29886 /// 102465503	BE221804	1	-0.3	0.042
MIR6883 /// PER1	microRNA 6883 /// period circadian clock 1	202861_at	5187 /// 102465532	NM_002616	1	0.8	0.00029
MIR6883 /// PER1	microRNA 6883 /// period circadian clock 1	244677_at	5187 /// 102465532	AA416756	1	1	8.6e-05
MIR6883 /// PER1	microRNA 6883 /// period circadian clock 1	36829_at	5187 /// 102465532	AF022991	1	0.3	0.031
MIR943 /// NELFA	microRNA 943 /// negative elongation factor complex member A	34225_at	7469 /// 100126332	AF101434	1	-0.4	0.032
MIRLET7D	microRNA let-7d	227793_at	406886	AA969238	1	0.3	0.047
MIS18A	MIS18 kinetochore protein A	228597_at	54069	AW151538	1	-0.6	0.0073
MIS18BP1	MIS18 binding protein 1	226630_at	55320	BF062175	1	-0.4	0.014
MITD1	MIT, microtubule interacting and transport, domain containing 1	226329_s_at	129531	BF055289	1	-0.3	0.038
MITF	microphthalmia-associated transcription factor	226066_at	4286	AL117653	1	-0.4	0.012
MKI67	marker of proliferation Ki-67	212021_s_at	4288	AU132185	1	-0.4	0.032
MKI67	marker of proliferation Ki-67	212022_s_at	4288	BF001806	1	-0.5	0.0078
MKI67	marker of proliferation Ki-67	212023_s_at	4288	AU147044	1	-0.5	0.011
MKL1	megakaryoblastic leukemia (translocation) 1	215291_at	57591	AL022238	1	0.4	0.026
MKL2	MKL/myocardin-like 2	1558777_at	57496	AK093577	1	0.6	0.0023
MKL2	MKL/myocardin-like 2	218259_at	57496	NM_014048	1	-0.4	0.018
MKRN1	makorin ring finger protein 1	209845_at	23608	AF117233	1	-0.3	0.029
MLH3	mutL homolog 3	204838_s_at	27030	NM_014381	1	-0.3	0.025
MLLT3	myeloid/lymphoid or mixed-lineage leukemia (trithorax homolog, Drosophila); translocated to, 3	204917_s_at	4300	AV756536	1	-0.4	0.023
MME	membrane metallo-endopeptidase	203434_s_at	4311	AI433463	1	-0.5	0.032
MMP1	matrix metallopeptidase 1 (interstitial collagenase)	204475_at	4312	NM_002421	1	-0.5	0.009
MND1	meiotic nuclear divisions 1 homolog (S. cerevisiae)	223700_at	84057	AY028916	1	-0.4	0.03
MNDA	myeloid cell nuclear differentiation antigen	204959_at	4332	NM_002432	1	0.5	0.047
MNS1	meiosis-specific nuclear structural 1	219703_at	55329	NM_018365	1	-0.7	0.0023
MNT	MAX network transcriptional repressor	204206_at	4335	NM_020310	1	-0.3	0.028
MOB1A	MOB kinase activator 1A	201299_s_at	55233	NM_018221	1	-0.4	0.043
MON1B	MON1 secretory trafficking family member B	227116_at	22879	AI934828	1	-0.4	0.034
MPHOSPH8	M-phase phosphoprotein 8	221771_s_at	54737	BC003542	1	-0.5	0.025
MPHOSPH9	M-phase phosphoprotein 9	1558369_at	10198	BC036600	1	-0.5	0.039
MPHOSPH9	M-phase phosphoprotein 9	215731_s_at	10198	X98258	1	-0.4	0.027
MPP6	membrane protein, palmitoylated 6 (MAGUK p55 subfamily member 6)	1558522_at	51678	BC013077	1	-0.6	0.0098
MR1	major histocompatibility complex, class I-related	235352_at	3140	AI270356	1	-0.3	0.04
MRE11A	MRE11 meiotic recombination 11 homolog A (S. cerevisiae)	205395_s_at	4361	NM_005590	1	-0.3	0.042
MROH2A	maestro heat-like repeat family member 2A	1556167_at	339766	BC042133	1	0.5	0.015
MROH2A	maestro heat-like repeat family member 2A	1556168_s_at	339766	BC042133	1	0.3	0.031
MRPL19	mitochondrial ribosomal protein L19	203465_at	9801	NM_014763	1	-0.3	0.042
MRPL19	mitochondrial ribosomal protein L19	232071_at	9801	BF670827	1	-0.5	0.041
MRPL30	mitochondrial ribosomal protein L30	243887_at	51263	AI830655	1	-0.4	0.011
MRPL42	mitochondrial ribosomal protein L42	242289_at	28977	AW962413	1	-0.5	0.0097
MRPL47	mitochondrial ribosomal protein L47	223481_s_at	57129	AF285120	1	0.4	0.047
MRPS16	mitochondrial ribosomal protein S16	222499_at	51021	BE964789	1	-0.5	0.0061
MRPS30	mitochondrial ribosomal protein S30	227600_at	10884	AW272333	1	-0.4	0.027
MSH2	mutS homolog 2	209421_at	4436	U04045	1	-0.4	0.042
MSI2	musashi RNA-binding protein 2	226134_s_at	124540	AI978754	1	-0.6	0.0093
MTAP	methylthioadenosine phosphorylase	211363_s_at	4507	AF109294	1	-0.3	0.038
MTCL1	microtubule crosslinking factor 1	213358_at	23255	AB018345	1	-0.4	0.03
MTDH	metadherin	212248_at	92140	AI886796	1	-0.4	0.02
MTDH	metadherin	212250_at	92140	AV700332	1	-0.3	0.049
MTERF4	mitochondrial transcription termination factor 4	1557966_x_at	130916	AL566167	1	-0.4	0.029
MTFR2	mitochondrial fission regulator 2	228069_at	113115	AL138828	1	-0.4	0.024
MTHFD2	methylenetetrahydrofolate dehydrogenase (NADP+ dependent) 2, methenyltetrahydrofolate cyclohydrolase	201761_at	10797	NM_006636	1	-0.3	0.041
MTHFD2	methylenetetrahydrofolate dehydrogenase (NADP+ dependent) 2, methenyltetrahydrofolate cyclohydrolase	234976_x_at	10797	BG324504	1	-0.4	0.016
MTIF2	mitochondrial translational initiation factor 2	203095_at	4528	NM_002453	1	-0.4	0.017
MTMR4	myotubularin related protein 4	212277_at	9110	AB014547	1	-0.3	0.034
MTR	5-methyltetrahydrofolate-homocysteine methyltransferase	203774_at	4548	NM_000254	1	-0.4	0.02
MTRF1	mitochondrial translational release factor 1	244763_at	9617	AA573449	1	-0.3	0.046
MTSS1	metastasis suppressor 1	203037_s_at	9788	NM_014751	1	-0.4	0.022
MTSS1L	metastasis suppressor 1-like	1555894_s_at	92154	AA829283	1	0.4	0.036
MTX3	metaxin 3	226528_at	345778	AI743044	1	-0.3	0.032
MUC5B	mucin 5B, oligomeric mucus/gel-forming	213432_at	727897	AI697108	1	-0.6	0.0067
MUM1	melanoma associated antigen (mutated) 1	221290_s_at	84939	NM_016473	1	-0.4	0.023
MUSK	muscle, skeletal, receptor tyrosine kinase	207633_s_at	4593	NM_005592	1	0.5	0.022
MVB12A	multivesicular body subunit 12A	227864_s_at	93343	AI091713	1	-0.4	0.042
MYBL1	v-myb avian myeloblastosis viral oncogene homolog-like 1	213906_at	4603	AW592266	1	-0.7	0.0084
MYBL2	v-myb avian myeloblastosis viral oncogene homolog-like 2	201710_at	4605	NM_002466	1	-0.4	0.023
MYCBPAP	MYCBP associated protein	223731_at	84073	AL136765	1	0.3	0.044
MYL1	myosin, light chain 1, alkali; skeletal, fast	209888_s_at	4632	M20643	1	0.4	0.044
MYL10	myosin, light chain 10, regulatory	221660_at	93408	BC002778	1	0.4	0.04
MYO10	myosin X	244350_at	4651	N33403	1	-0.4	0.023
MYO1D	myosin ID	212338_at	4642	AA621962	1	-0.3	0.031
MYO1E	myosin IE	203072_at	4643	NM_004998	1	-0.3	0.04
MYO1H	myosin IH	1553452_at	283446	NM_173597	1	0.4	0.02
MYO5A	myosin VA (heavy chain 12, myoxin)	227761_at	4644	AW235548	1	-0.4	0.027
MYO6	myosin VI	203216_s_at	4646	NM_004999	1	-0.3	0.044
MYRFL	myelin regulatory factor-like	1556267_at	196446	AK057785	1	0.6	0.017
MYRIP	myosin VIIA and Rab interacting protein	214156_at	25924	AL050090	1	-0.5	0.022
N4BP2	NEDD4 binding protein 2	228242_at	55728	BF055201	1	-0.7	0.0017
NAA40	N(alpha)-acetyltransferase 40, NatD catalytic subunit	218734_at	79829	NM_024771	1	-0.4	0.027
NAA40	N(alpha)-acetyltransferase 40, NatD catalytic subunit	222369_at	79829	AW971254	1	-0.5	0.01
NAA50	N(alpha)-acetyltransferase 50, NatE catalytic subunit	239138_at	80218	H16725	1	-0.4	0.048
NACC2	NACC family member 2, BEN and BTB (POZ) domain containing	212993_at	138151	AA114166	1	-0.3	0.046
NADK2	NAD kinase 2, mitochondrial	228594_at	133686	H94910	1	-0.4	0.043
NADK2	NAD kinase 2, mitochondrial	229299_at	133686	AI816919	1	-0.3	0.036
NADK2-AS1	NADK2 antisense RNA 1	1563219_at	101056700	BG771949	1	0.5	0.031
NAGLU	N-acetylglucosaminidase, alpha	204360_s_at	4669	NM_000263	1	-0.4	0.034
NANS	N-acetylneuraminic acid synthase	218189_s_at	54187	NM_018946	1	-0.4	0.04
NAPG	N-ethylmaleimide-sensitive factor attachment protein, gamma	225448_at	8774	AL519376	1	-0.4	0.017
NASP	nuclear autoantigenic sperm protein (histone-binding)	201970_s_at	4678	NM_002482	1	-0.4	0.016
NAV2-AS5	NAV2 antisense RNA 5	1562320_at	100874012	BC040220	1	0.3	0.048
NBEAL1	neurobeachin-like 1	1554106_at	65065	AB053318	1	-0.5	0.017
NBEAL2	neurobeachin-like 2	212443_at	23218	AB011112	1	-0.4	0.025
NBPF20	neuroblastoma breakpoint family, member 20	227926_s_at	100288142	AI498207	1	-0.5	0.0073
NCAM1	neural cell adhesion molecule 1	227394_at	4684	W94001	1	0.3	0.047
NCAPD2	non-SMC condensin I complex, subunit D2	201774_s_at	9918	AK022511	1	-0.5	0.01
NCAPG	non-SMC condensin I complex, subunit G	218662_s_at	64151	NM_022346	1	-0.6	0.0094
NCAPG	non-SMC condensin I complex, subunit G	218663_at	64151	NM_022346	1	-0.7	0.0021
NCAPG2	non-SMC condensin II complex, subunit G2	219588_s_at	54892	NM_017760	1	-0.6	0.0024
NCAPH	non-SMC condensin I complex, subunit H	212949_at	23397	D38553	1	-0.4	0.023
NCOR1	nuclear receptor corepressor 1	200857_s_at	9611	NM_006311	1	-0.3	0.042
NCS1	neuronal calcium sensor 1	230138_at	23413	BF111850	1	0.3	0.029
NDC80	NDC80 kinetochore complex component	204162_at	10403	NM_006101	1	-0.7	0.0019
NDE1	nudE neurodevelopment protein 1	227249_at	54820	AI857685	1	-0.4	0.05
NDFIP1	Nedd4 family interacting protein 1	222423_at	80762	H05010	1	-0.4	0.029
NDRG3	NDRG family member 3	221082_s_at	57446	NM_022477	1	-0.4	0.042
NDRG3	NDRG family member 3	224368_s_at	57446	AF251054	1	-0.5	0.032
NDUFA5	NADH dehydrogenase (ubiquinone) 1 alpha subcomplex, 5	201304_at	4698	NM_005000	1	-0.3	0.05
NEB	nebulin	205054_at	4703	NM_004543	1	-0.8	0.00037
NEIL3	nei endonuclease VIII-like 3 (E. coli)	219502_at	55247	NM_018248	1	-0.5	0.022
NEK2	NIMA-related kinase 2	204641_at	4751	NM_002497	1	-0.5	0.021
NEK8	NIMA-related kinase 8	1557170_at	284086	AI073943	1	-0.3	0.037
NEK9	NIMA-related kinase 9	230153_at	91754	AI961740	1	0.3	0.041
NEO1	neogenin 1	225270_at	4756	AL355708	1	-0.5	0.011
NETO2	neuropilin (NRP) and tolloid (TLL)-like 2	218888_s_at	81831	NM_018092	1	-0.4	0.019
NF2	neurofibromin 2 (merlin)	204991_s_at	4771	NM_000268	1	-0.5	0.0079
NF2	neurofibromin 2 (merlin)	211091_s_at	4771	AF122828	1	-0.5	0.016
NFATC2IP	nuclear factor of activated T-cells, cytoplasmic, calcineurin-dependent 2 interacting protein	212808_at	84901	AI884627	1	-0.5	0.0092
NFATC2IP	nuclear factor of activated T-cells, cytoplasmic, calcineurin-dependent 2 interacting protein	217526_at	84901	AI478300	1	-0.4	0.029
NFATC2IP	nuclear factor of activated T-cells, cytoplasmic, calcineurin-dependent 2 interacting protein	217527_s_at	84901	AI478300	1	-0.4	0.028
NFATC2IP	nuclear factor of activated T-cells, cytoplasmic, calcineurin-dependent 2 interacting protein	229235_at	84901	AI983432	1	-0.6	0.006
NFKBIA	nuclear factor of kappa light polypeptide gene enhancer in B-cells inhibitor, alpha	201502_s_at	4792	AI078167	1	1.7	1.1e-07
NFKBID	nuclear factor of kappa light polypeptide gene enhancer in B-cells inhibitor, delta	241889_at	84807	AW151637	1	0.4	0.029
NFYC-AS1	NFYC antisense RNA 1	1558782_a_at	100130557	BG390627	1	0.3	0.041
NHLRC2	NHL repeat containing 2	219353_at	374354	NM_017687	1	-0.5	0.011
NHS	Nance-Horan syndrome (congenital cataracts and dental anomalies)	228933_at	4810	BF111819	1	-0.6	0.0019
NID1	nidogen 1	202007_at	4811	BF940043	1	-0.4	0.025
NIFK-AS1	NIFK antisense RNA 1	235132_at	254128	BF939830	1	-0.5	0.029
NIPAL2	NIPA-like domain containing 2	227001_at	79815	AI096706	1	-0.3	0.035
NIPAL3	NIPA-like domain containing 3	210267_at	57185	BC001265	1	0.4	0.019
NIPSNAP3A	nipsnap homolog 3A (C. elegans)	224436_s_at	25934	BC005935	1	-0.4	0.041
NLK	nemo-like kinase	222589_at	51701	AI967933	1	-0.4	0.028
NMT1	N-myristoyltransferase 1	201159_s_at	4836	NM_021079	1	-0.3	0.025
NOL3	nucleolar protein 3 (apoptosis repressor with CARD domain)	59625_at	8996	AI912351	1	-0.4	0.026
NOP16	NOP16 nucleolar protein	203023_at	51491	NM_016391	1	-0.4	0.026
NOSIP	nitric oxide synthase interacting protein	217950_at	51070	NM_015953	1	-0.5	0.026
NPAS2	neuronal PAS domain protein 2	39549_at	4862	AI743090	1	-0.4	0.049
NPAS3	neuronal PAS domain protein 3	230412_at	64067	BF196935	1	0.4	0.049
NPAS4	neuronal PAS domain protein 4	1554299_at	266743	AB049469	1	0.4	0.019
NPAT	nuclear protein, ataxia-telangiectasia locus	209798_at	4863	D83243	1	-0.4	0.02
NPHP1	nephronophthisis 1 (juvenile)	206285_at	4867	NM_000272	1	0.3	0.038
NPHP3	nephronophthisis 3 (adolescent)	235432_at	27031	BE865779	1	-0.4	0.029
NPNT	nephronectin	225911_at	255743	AL138410	1	-0.4	0.03
NR1D1 /// THRA	nuclear receptor subfamily 1, group D, member 1 /// thyroid hormone receptor, alpha	204760_s_at	7067 /// 9572	NM_021724	1	0.9	0.00024
NR1D2	nuclear receptor subfamily 1, group D, member 2	225768_at	9975	AI761621	1	-0.5	0.033
NR2F2	nuclear receptor subfamily 2, group F, member 2	229092_at	7026	AI420144	1	-0.3	0.031
NR4A1	nuclear receptor subfamily 4, group A, member 1	211143_x_at	3164	D49728	1	0.3	0.05
NR5A2	nuclear receptor subfamily 5, group A, member 2	208343_s_at	2494	AF146343	1	0.4	0.025
NRG1	neuregulin 1	206343_s_at	3084	NM_013959	1	-0.4	0.023
NRG3	neuregulin 3	229233_at	10718	H05240	1	-0.3	0.031
NRTN	neurturin	210683_at	4902	AL161995	1	-0.8	0.014
NSF	N-ethylmaleimide-sensitive factor	1566785_x_at	4905	AK025172	1	-0.4	0.05
NSRP1	nuclear speckle splicing regulatory protein 1	223236_at	84081	AL136806	1	-0.4	0.034
NT5C1B-RDH14 /// RDH14	NT5C1B-RDH14 readthrough /// retinol dehydrogenase 14 (all-trans/9-cis/11-cis)	222203_s_at	57665 /// 100526794	AK023625	1	-0.5	0.0078
NT5DC1	5'-nucleotidase domain containing 1	223178_s_at	221294	AF245044	1	-0.4	0.023
NT5DC4	5'-nucleotidase domain containing 4	1562019_at	284958	AK092780	1	-0.7	0.0019
NUCKS1	nuclear casein kinase and cyclin-dependent kinase substrate 1	229353_s_at	64710	AW515443	1	-0.5	0.029
NUDT15	nudix (nucleoside diphosphate linked moiety X)-type motif 15	219347_at	55270	NM_018283	1	-0.3	0.046
NUDT16	nudix (nucleoside diphosphate linked moiety X)-type motif 16	228341_at	131870	AI809108	1	-0.3	0.032
NUDT21	nudix (nucleoside diphosphate linked moiety X)-type motif 21	224830_at	11051	AL520677	1	-0.4	0.027
NUDT3 /// RPS10-NUDT3	nudix (nucleoside diphosphate linked moiety X)-type motif 3 /// RPS10-NUDT3 readthrough	229803_s_at	11165 /// 100529239	AI347000	1	-0.4	0.026
NUDT5	nudix (nucleoside diphosphate linked moiety X)-type motif 5	222824_at	11164	AW237290	1	-0.4	0.016
NUDT7	nudix (nucleoside diphosphate linked moiety X)-type motif 7	228855_at	283927	AI927964	1	-0.7	0.012
NUF2	NUF2, NDC80 kinetochore complex component	223381_at	83540	AF326731	1	-0.7	0.0022
NUMA1	nuclear mitotic apparatus protein 1	214251_s_at	4926	AI337584	1	-0.4	0.022
NUP133	nucleoporin 133kDa	202184_s_at	55746	NM_018230	1	-0.3	0.027
NUP155	nucleoporin 155kDa	206550_s_at	9631	NM_004298	1	-0.3	0.048
NUP35	nucleoporin 35kDa	225470_at	129401	AL529634	1	-0.4	0.04
NUP50	nucleoporin 50kDa	218294_s_at	10762	AF267865	1	-0.4	0.018
NUP62	nucleoporin 62kDa	202153_s_at	23636	NM_016553	1	-0.3	0.048
NUP62	nucleoporin 62kDa	236505_at	23636	AI807145	1	0.4	0.023
NUP62CL	nucleoporin 62kDa C-terminal like	220520_s_at	54830	NM_017681	1	-0.4	0.013
NUP85	nucleoporin 85kDa	218014_at	79902	NM_024844	1	-0.3	0.034
NUSAP1	nucleolar and spindle associated protein 1	218039_at	51203	NM_016359	1	-0.6	0.0072
NUSAP1	nucleolar and spindle associated protein 1	219978_s_at	51203	NM_018454	1	-0.4	0.049
NWD2	NACHT and WD repeat domain containing 2	230765_at	57495	AL037517	1	-0.4	0.047
OAF	OAF homolog (Drosophila)	228939_at	220323	AU145346	1	0.3	0.042
OARD1	O-acyl-ADP-ribose deacylase 1	213322_at	221443	AL031778	1	-0.4	0.013
OARD1	O-acyl-ADP-ribose deacylase 1	238860_at	221443	AA398043	1	-0.3	0.041
OBSL1	obscurin-like 1	212775_at	23363	AI978623	1	-0.4	0.022
OBSL1	obscurin-like 1	212776_s_at	23363	AI978623	1	-0.3	0.038
ODF2	outer dense fiber of sperm tails 2	225617_at	4957	AL138382	1	-0.3	0.038
ODF2L	outer dense fiber of sperm tails 2-like	228577_x_at	57489	AI338465	1	-0.4	0.045
OGFOD1	2-oxoglutarate and iron-dependent oxygenase domain containing 1	225110_at	55239	AK024314	1	-0.3	0.036
OGFOD2	2-oxoglutarate and iron-dependent oxygenase domain containing 2	219245_s_at	79676	AI309636	1	-0.3	0.049
OGFRL1	opioid growth factor receptor-like 1	226810_at	79627	BE500942	1	-0.4	0.047
OGT	O-linked N-acetylglucosamine (GlcNAc) transferase	229787_s_at	8473	AI742039	1	-0.6	0.037
OIP5	Opa interacting protein 5	213599_at	11339	BE045993	1	-0.5	0.02
OIP5-AS1	OIP5 antisense RNA 1	225332_at	729082	BF674064	1	-0.5	0.029
OIP5-AS1	OIP5 antisense RNA 1	231808_at	729082	AY007106	1	-0.4	0.04
OLFM4	olfactomedin 4	212768_s_at	10562	AL390736	1	-0.3	0.047
OMD	osteomodulin	205908_s_at	4958	NM_005014	1	0.4	0.048
OPA1	optic atrophy 1 (autosomal dominant)	214306_at	4976	AA209332	1	-0.4	0.013
OR1A2	olfactory receptor, family 1, subfamily A, member 2	221445_at	26189	NM_012352	1	0.4	0.026
OR7E14P	olfactory receptor, family 7, subfamily E, member 14 pseudogene	217551_at	10819	AA719797	1	-0.4	0.02
ORAI2	ORAI calcium release-activated calcium modulator 2	217529_at	80228	BE547674	1	-0.5	0.016
ORAI2	ORAI calcium release-activated calcium modulator 2	218812_s_at	80228	NM_025156	1	-0.4	0.026
ORAI2	ORAI calcium release-activated calcium modulator 2	231406_at	80228	AW205664	1	-0.4	0.034
ORC1	origin recognition complex, subunit 1	205085_at	4998	NM_004153	1	-0.4	0.024
ORC6	origin recognition complex, subunit 6	219105_x_at	23594	NM_014321	1	-0.3	0.048
OSBPL1A	oxysterol binding protein-like 1A	209485_s_at	114876	W19983	1	-0.5	0.011
OTUD1	OTU deubiquitinase 1	226140_s_at	220213	AI934347	1	-0.4	0.021
OTUD6B	OTU domain containing 6B	222825_at	51633	BF435752	1	-0.4	0.026
OXR1	oxidation resistance 1	222553_x_at	55074	AL541048	1	-0.4	0.034
P4HTM	prolyl 4-hydroxylase, transmembrane (endoplasmic reticulum)	222125_s_at	54681	BC000580	1	-0.3	0.049
PACRGL	PARK2 co-regulated-like	235554_x_at	133015	BE048198	1	-0.3	0.049
PAGR1	PAXIP1 associated glutamate-rich protein 1	231878_at	79447	AK026112	1	-0.4	0.045
PAIP1	poly(A) binding protein interacting protein 1	208051_s_at	10605	NM_006451	1	-0.3	0.04
PAIP2	poly(A) binding protein interacting protein 2	1560065_at	51247	BG717042	1	0.5	0.013
PAK1	p21 protein (Cdc42/Rac)-activated kinase 1	230100_x_at	5058	AU147145	1	-0.4	0.021
PALB2	partner and localizer of BRCA2	219530_at	79728	NM_024675	1	-0.3	0.046
PALM3	paralemmin 3	231018_at	342979	BF195936	1	-0.4	0.019
PAPOLA	poly(A) polymerase alpha	209388_at	10914	BC000927	1	-0.4	0.03
PAPOLA	poly(A) polymerase alpha	222035_s_at	10914	AI984479	1	-0.4	0.016
PAPOLA	poly(A) polymerase alpha	228569_at	10914	AV683473	1	-0.4	0.02
PAPOLB	poly(A) polymerase beta (testis specific)	242158_at	56903	AA609118	1	0.5	0.025
PAPPA2	pappalysin 2	228237_at	60676	N30053	1	0.5	0.011
PARP11	poly (ADP-ribose) polymerase family, member 11	229138_at	57097	AV747166	1	-0.4	0.022
PARP2	poly (ADP-ribose) polymerase 2	214086_s_at	10038	AK001980	1	-0.4	0.019
PAWR	PRKC, apoptosis, WT1, regulator	226231_at	5074	AI189509	1	-0.4	0.017
PBK	PDZ binding kinase	219148_at	55872	NM_018492	1	-0.4	0.012
PBLD	phenazine biosynthesis-like protein domain containing	219543_at	64081	NM_022129	1	-0.5	0.014
PBRM1	polybromo 1	221212_x_at	55193	NM_018313	1	0.4	0.029
PBRM1	polybromo 1	223238_s_at	55193	AF130061	1	-0.6	0.0028
PCBD2	pterin-4 alpha-carbinolamine dehydratase/dimerization cofactor of hepatocyte nuclear factor 1 alpha (TCF1) 2	1554894_a_at	84105	AF499009	1	-0.5	0.031
PCDH7	protocadherin 7	210273_at	5099	AB006757	1	0.4	0.033
PCDHA1 /// PCDHA10 /// PCDHA11 /// PCDHA12 /// PCDHA13 /// PCDHA2 /// PCDHA3 /// PCDHA4 /// PCDHA5 /// PCDHA6 /// PCDHA7 /// PCDHA8 /// PCDHA9 /// PCDHAC1 /// PCDHAC2	protocadherin alpha 1 /// protocadherin alpha 10 /// protocadherin alpha 11 /// protocadherin alpha 12 /// protocadherin alpha 13 /// protocadherin alpha 2 /// protocadherin alpha 3 /// protocadherin alpha 4 /// protocadherin alpha 5 /// protocadherin alpha 6 /// protocadherin alpha 7 /// protocadherin alpha 8 /// protocadherin alpha 9 /// protocadherin alpha subfamily C, 1 /// protocadherin alph…	224212_s_at	9752 /// 56134 /// 56135 /// 56136 /// 56137 /// 56138 /// 56139 /// 56140 /// 56141 /// 56142 /// 56143 /// 56144 /// 56145 /// 56146 /// 56147	AF169689	1	-0.4	0.046
PCGF5	polycomb group ring finger 5	226326_at	84333	AI798098	1	-0.3	0.049
PCGF5	polycomb group ring finger 5	229194_at	84333	AL045882	1	-0.4	0.028
PCK2	phosphoenolpyruvate carboxykinase 2 (mitochondrial)	202847_at	5106	NM_004563	1	-0.4	0.029
PCLO	piccolo presynaptic cytomatrix protein	210650_s_at	27445	BC001304	1	-0.3	0.043
PCM1	pericentriolar material 1	202174_s_at	5108	NM_006197	1	-0.3	0.047
PCM1	pericentriolar material 1	214118_x_at	5108	AI205598	1	-0.3	0.046
PCM1	pericentriolar material 1	214937_x_at	5108	AI924817	1	-0.3	0.032
PCM1	pericentriolar material 1	228905_at	5108	BE672700	1	-0.6	0.021
PCMTD2	protein-L-isoaspartate (D-aspartate) O-methyltransferase domain containing 2	212406_s_at	55251	AB028973	1	-0.4	0.034
PCNX	pecanex homolog (Drosophila)	229287_at	22990	BE326214	1	-0.7	0.00057
PCNXL2	pecanex-like 2 (Drosophila)	229202_at	80003	AI768826	1	-0.5	0.0092
PCNXL4	pecanex-like 4 (Drosophila)	219972_s_at	64430	NM_022495	1	-0.7	0.006
PCOLCE2	procollagen C-endopeptidase enhancer 2	219295_s_at	26577	NM_013363	1	-0.4	0.03
PCSK5	proprotein convertase subtilisin/kexin type 5	205559_s_at	5125	NM_006200	1	-0.5	0.025
PCYOX1L	prenylcysteine oxidase 1 like	218953_s_at	78991	NM_024028	1	-0.3	0.037
PDCD6IP	programmed cell death 6 interacting protein	222394_at	10015	BG484789	1	-0.3	0.038
PDCD7	programmed cell death 7	231809_x_at	10081	AW953770	1	-0.3	0.032
PDCL	phosducin-like	204449_at	5082	NM_005388	1	-0.4	0.023
PDGFD	platelet derived growth factor D	219304_s_at	80310	NM_025208	1	-0.4	0.026
PDHA1	pyruvate dehydrogenase (lipoamide) alpha 1	200979_at	5160	BF739979	1	-0.4	0.027
PDHB	pyruvate dehydrogenase (lipoamide) beta	211023_at	5162	AL117618	1	-0.4	0.029
PDIA2	protein disulfide isomerase family A, member 2	206691_s_at	64714	NM_006849	1	0.4	0.049
PDK1	pyruvate dehydrogenase kinase, isozyme 1	226452_at	5163	AU146532	1	-0.4	0.023
PDK3	pyruvate dehydrogenase kinase, isozyme 3	228959_at	5165	AI676241	1	-0.5	0.017
PDS5B	PDS5, regulator of cohesion maintenance, homolog B (S. cerevisiae)	207956_x_at	23047	NM_015928	1	-0.3	0.038
PDSS1	prenyl (decaprenyl) diphosphate synthase, subunit 1	220865_s_at	23590	NM_014317	1	-0.4	0.025
PDXK	pyridoxal (pyridoxine, vitamin B6) kinase	202671_s_at	8566	NM_003681	1	-0.3	0.05
PDZD8	PDZ domain containing 8	213549_at	118987	AI890972	1	-0.3	0.046
PDZD8	PDZ domain containing 8	225830_at	118987	AI052247	1	0.3	0.031
PDZK1	PDZ domain containing 1	205380_at	5174	NM_002614	1	-0.6	0.0031
PERP	PERP, TP53 apoptosis effector	236009_at	64065	AI767250	1	-0.4	0.025
PET117	PET117 homolog (S. cerevisiae)	228543_at	100303755	AA780252	1	-0.5	0.016
PEX5L	peroxisomal biogenesis factor 5-like	219642_s_at	51555	NM_016559	1	0.3	0.033
PEX7	peroxisomal biogenesis factor 7	205420_at	5191	NM_000288	1	-0.3	0.044
PFKFB2	6-phosphofructo-2-kinase/fructose-2,6-biphosphatase 2	226733_at	5208	AA587884	1	-0.5	0.0099
PGAM2	phosphoglycerate mutase 2 (muscle)	205736_at	5224	NM_000290	1	0.4	0.03
PGGT1B	protein geranylgeranyltransferase type I, beta subunit	235615_at	5229	BF029960	1	-0.4	0.018
PHACTR2	phosphatase and actin regulator 2	227947_at	9749	AV724107	1	-0.5	0.015
PHACTR3	phosphatase and actin regulator 3	227949_at	116154	AL357503	1	-0.4	0.023
PHAX	phosphorylated adaptor for RNA export	234405_s_at	51808	AK024065	1	-0.5	0.0093
PHAX	phosphorylated adaptor for RNA export	235767_x_at	51808	AI338514	1	-0.4	0.011
PHC3	polyhomeotic homolog 3 (Drosophila)	238693_at	80012	AA165136	1	-0.3	0.04
PHF20	PHD finger protein 20	209422_at	51230	AL109965	1	-0.5	0.012
PHGDH	phosphoglycerate dehydrogenase	201397_at	26227	NM_006623	1	-0.3	0.038
PHLDB2	pleckstrin homology-like domain, family B, member 2	225688_s_at	90102	AK025444	1	-0.3	0.049
PI4KA	phosphatidylinositol 4-kinase, catalytic, alpha	207081_s_at	5297	NM_002650	1	-0.4	0.03
PIAS1	protein inhibitor of activated STAT, 1	217863_at	8554	AI348378	1	-0.4	0.023
PIAS4	protein inhibitor of activated STAT, 4	212881_at	51588	AK022481	1	-0.3	0.044
PICALM	phosphatidylinositol binding clathrin assembly protein	212511_at	8301	AI766247	1	-0.5	0.012
PIEZO2	piezo-type mechanosensitive ion channel component 2	219602_s_at	63895	NM_022068	1	0.5	0.021
PIF1	PIF1 5'-to-3' DNA helicase	1555591_at	80119	BC018978	1	-0.3	0.048
PIGB	phosphatidylinositol glycan anchor biosynthesis, class B	205452_at	9488	NM_004855	1	-0.3	0.027
PIGB	phosphatidylinositol glycan anchor biosynthesis, class B	242760_x_at	9488	AA808203	1	-0.4	0.026
PIGK	phosphatidylinositol glycan anchor biosynthesis, class K	209707_at	10026	AF022913	1	-0.3	0.049
PIGK	phosphatidylinositol glycan anchor biosynthesis, class K	227639_at	10026	AI275605	1	-0.5	0.012
PIGW	phosphatidylinositol glycan anchor biosynthesis, class W	1558292_s_at	284098	BF037819	1	-0.5	0.028
PIGX	phosphatidylinositol glycan anchor biosynthesis, class X	1552291_at	54965	NM_017861	1	-0.5	0.03
PIGZ	phosphatidylinositol glycan anchor biosynthesis, class Z	220041_at	80235	NM_025163	1	-0.4	0.021
PIH1D3	PIH1 domain containing 3	231389_at	139212	AL136112	1	0.4	0.031
PIK3C3	phosphatidylinositol 3-kinase, catalytic subunit type 3	239300_at	5289	AI632214	1	-0.5	0.0077
PITPNA	phosphatidylinositol transfer protein, alpha	201191_at	5306	H15647	1	-0.4	0.044
PITPNA	phosphatidylinositol transfer protein, alpha	201192_s_at	5306	NM_006224	1	-0.3	0.036
PITPNM3	PITPNM family member 3	230076_at	83394	BF063164	1	-0.4	0.036
PIWIL2	piwi-like RNA-mediated gene silencing 2	220686_s_at	55124	NM_018068	1	0.4	0.04
PKI55	DKFZp434H1419	214717_at	150967	AL137534	1	-0.3	0.032
PKP4	plakophilin 4	201927_s_at	8502	BG292559	1	-0.4	0.037
PLA2G12A	phospholipase A2, group XIIA	228084_at	81579	AI767751	1	-0.5	0.02
PLAA	phospholipase A2-activating protein	235394_at	9373	AW614597	1	-0.4	0.026
PLAC8	placenta-specific 8	219014_at	51316	NM_016619	1	-0.3	0.026
PLAGL1	pleiomorphic adenoma gene-like 1	207002_s_at	5325	NM_002656	1	-0.4	0.024
PLCB1	phospholipase C, beta 1 (phosphoinositide-specific)	213222_at	23236	AL049593	1	-0.4	0.03
PLCB4	phospholipase C, beta 4	203895_at	5332	AL535113	1	-0.4	0.029
PLCL2	phospholipase C-like 2	213309_at	23228	AL117515	1	-0.3	0.027
PLCL2	phospholipase C-like 2	216218_s_at	23228	AK023546	1	-0.3	0.036
PLCXD2	phosphatidylinositol-specific phospholipase C, X domain containing 2	235230_at	257068	AW170015	1	-0.4	0.048
PLEKHA3	pleckstrin homology domain containing, family A (phosphoinositide binding specific) member 3	227659_at	65977	BE550332	1	0.3	0.027
PLEKHA6	pleckstrin homology domain containing, family A member 6	229245_at	22874	AA535361	1	-0.5	0.0049
PLEKHB1	pleckstrin homology domain containing, family B (evectins) member 1	209504_s_at	58473	AF081583	1	-0.4	0.026
PLEKHB1	pleckstrin homology domain containing, family B (evectins) member 1	229047_at	58473	BE467496	1	0.4	0.028
PLEKHH2	pleckstrin homology domain containing, family H (with MyTH4 domain) member 2	227148_at	130271	AI913749	1	-0.6	0.0067
PLEKHO1	pleckstrin homology domain containing, family O member 1	218223_s_at	51177	NM_016274	1	0.4	0.045
PLXNA1	plexin A1	221538_s_at	5361	AL136663	1	-0.3	0.034
PMCH	pro-melanin-concentrating hormone	206942_s_at	5367	NM_002674	1	-0.4	0.045
PMM1	phosphomannomutase 1	203467_at	5372	NM_002676	1	-0.4	0.042
PNKP	polynucleotide kinase 3'-phosphatase	218961_s_at	11284	NM_007254	1	-0.4	0.021
PNMA2	paraneoplastic Ma antigen 2	209598_at	10687	AB020690	1	-0.4	0.015
PNN	pinin, desmosome associated protein	212036_s_at	5411	AW152664	1	-0.3	0.043
PNN	pinin, desmosome associated protein	212037_at	5411	BF508848	1	-0.3	0.049
POC1A	POC1 centriolar protein A	234749_s_at	25886	AL117629	1	-0.4	0.038
POGK	pogo transposable element with KRAB domain	239392_s_at	57645	AI983896	1	-0.4	0.025
POLD1	polymerase (DNA directed), delta 1, catalytic subunit	203422_at	5424	NM_002691	1	-0.3	0.029
POLE	polymerase (DNA directed), epsilon, catalytic subunit	216026_s_at	5426	AL080203	1	-0.3	0.044
POLI	polymerase (DNA directed) iota	238992_at	11201	AW129145	1	-0.4	0.028
POLR1A	polymerase (RNA) I polypeptide A, 194kDa	235280_at	25885	BG490453	1	-0.4	0.038
POLR2B	polymerase (RNA) II (DNA directed) polypeptide B, 140kDa	1555837_s_at	5431	BE614461	1	-0.4	0.026
POLR2J4	polymerase (RNA) II (DNA directed) polypeptide J4, pseudogene	60815_at	84820	AA601208	1	-0.4	0.027
POU6F2	POU class 6 homeobox 2	207450_s_at	11281	NM_007252	1	0.4	0.028
PPA2	pyrophosphatase (inorganic) 2	1559496_at	27068	AL833123	1	-0.5	0.02
PPAP2C	phosphatidic acid phosphatase type 2C	209529_at	8612	AF047760	1	-0.3	0.037
PPCDC	phosphopantothenoylcysteine decarboxylase	219066_at	60490	NM_021823	1	-0.4	0.03
PPFIBP1	PTPRF interacting protein, binding protein 1 (liprin beta 1)	203736_s_at	8496	NM_003622	1	-0.5	0.047
PPFIBP2	PTPRF interacting protein, binding protein 2 (liprin beta 2)	212841_s_at	8495	AI692180	1	-0.3	0.046
PPIG	peptidylprolyl isomerase G (cyclophilin G)	225902_at	9360	AW194716	1	-0.3	0.048
PPL	periplakin	203407_at	5493	NM_002705	1	-0.4	0.024
PPM1A	protein phosphatase, Mg2+/Mn2+ dependent, 1A	227728_at	5494	AA886888	1	-0.6	0.006
PPM1A	protein phosphatase, Mg2+/Mn2+ dependent, 1A	229027_at	5494	AI241945	1	-0.4	0.036
PPM1B	protein phosphatase, Mg2+/Mn2+ dependent, 1B	213225_at	5495	AJ271832	1	-0.5	0.017
PPP1R15A	protein phosphatase 1, regulatory subunit 15A	202014_at	23645	NM_014330	1	0.3	0.045
PPP1R15A	protein phosphatase 1, regulatory subunit 15A	37028_at	23645	U83981	1	0.5	0.012
PPP1R16B	protein phosphatase 1, regulatory subunit 16B	212750_at	26051	AB020630	1	0.3	0.045
PPP1R2	protein phosphatase 1, regulatory (inhibitor) subunit 2	202165_at	5504	BF966540	1	-0.4	0.024
PPP1R21	protein phosphatase 1, regulatory subunit 21	1553955_at	129285	AY134855	1	-0.4	0.025
PPP1R7	protein phosphatase 1, regulatory subunit 7	201214_s_at	5510	NM_002712	1	-0.4	0.036
PPP1R7	protein phosphatase 1, regulatory subunit 7	213465_s_at	5510	BF718769	1	-0.4	0.033
PPP2CA	protein phosphatase 2, catalytic subunit, alpha isozyme	238719_at	5515	BF060712	1	-0.4	0.029
PPP2R5E	protein phosphatase 2, regulatory subunit B', epsilon isoform	203338_at	5529	NM_006246	1	-0.3	0.049
PPP3CA	protein phosphatase 3, catalytic subunit, alpha isozyme	202457_s_at	5530	AA911231	1	-0.3	0.045
PPP3CB	protein phosphatase 3, catalytic subunit, beta isozyme	209817_at	5532	M29550	1	-0.4	0.032
PPP3CC	protein phosphatase 3, catalytic subunit, gamma isozyme	213950_s_at	5533	BE670265	1	0.3	0.048
PPP6C	protein phosphatase 6, catalytic subunit	225429_at	5537	BF437011	1	-0.3	0.038
PPWD1	peptidylprolyl isomerase domain and WD repeat containing 1	213483_at	23398	AK025679	1	-0.4	0.044
PRC1	protein regulator of cytokinesis 1	218009_s_at	9055	NM_003981	1	-0.6	0.0037
PRDM1	PR domain containing 1, with ZNF domain	228964_at	639	AI692659	1	0.4	0.044
PRDX5	peroxiredoxin 5	1560587_s_at	25824	AI718223	1	-0.9	0.0016
PRELID2	PRELI domain containing 2	236513_at	153768	AW770245	1	-0.4	0.018
PRIM1	primase, DNA, polypeptide 1 (49kDa)	205053_at	5557	NM_000946	1	-0.3	0.027
PRKAA2	protein kinase, AMP-activated, alpha 2 catalytic subunit	227892_at	5563	AA855042	1	-0.4	0.037
PRKAA2	protein kinase, AMP-activated, alpha 2 catalytic subunit	238441_at	5563	AI928203	1	-0.4	0.023
PRKAB2	protein kinase, AMP-activated, beta 2 non-catalytic subunit	225278_at	5565	BF593382	1	-0.4	0.021
PRKACB	protein kinase, cAMP-dependent, catalytic, beta	235780_at	5567	BE622723	1	-0.5	0.0093
PRKD1	protein kinase D1	205880_at	5587	NM_002742	1	-0.4	0.018
PRKDC	protein kinase, DNA-activated, catalytic polypeptide	208694_at	5591	U47077	1	-0.5	0.01
PRKDC	protein kinase, DNA-activated, catalytic polypeptide	210543_s_at	5591	U34994	1	-0.4	0.028
PROL1	proline rich, lacrimal 1	208004_at	58503	NM_021225	1	0.5	0.012
PROM2	prominin 2	1552797_s_at	150696	NM_144707	1	-0.5	0.01
PROSER1	proline and serine rich 1	225887_at	80209	AL522406	1	-0.5	0.0047
PRPF18	pre-mRNA processing factor 18	221547_at	8559	BC000794	1	-0.3	0.04
PRPF31	pre-mRNA processing factor 31	202407_s_at	26121	BF342707	1	-0.5	0.0097
PRPF31	pre-mRNA processing factor 31	202408_s_at	26121	NM_015629	1	-0.4	0.023
PRPF40A	PRP40 pre-mRNA processing factor 40 homolog A (S. cerevisiae)	218053_at	55660	NM_017892	1	-0.3	0.041
PRPS2	phosphoribosyl pyrophosphate synthetase 2	203401_at	5634	NM_002765	1	-0.5	0.01
PRPS2	phosphoribosyl pyrophosphate synthetase 2	230352_at	5634	AI392908	1	-0.6	0.022
PRR11	proline rich 11	228273_at	55771	BG165011	1	-0.7	0.004
PRR23D1 /// PRR23D2	proline rich 23 domain containing 1 /// proline rich 23 domain containing 2	240731_at	100131608 /// 100133251	AI141514	1	0.4	0.013
PRSS12	protease, serine, 12 (neurotrypsin, motopsin)	213802_at	8492	AI810767	1	-0.3	0.045
PRTFDC1	phosphoribosyl transferase domain containing 1	222803_at	56952	AI871620	1	-0.7	0.0012
PSAP	prosaposin	200866_s_at	5660	M32221	1	-0.4	0.031
PSD3	pleckstrin and Sec7 domain containing 3	203355_s_at	23362	NM_015310	1	-0.6	0.023
PSIP1	PC4 and SFRS1 interacting protein 1	205961_s_at	11168	NM_004682	1	-0.4	0.013
PSIP1	PC4 and SFRS1 interacting protein 1	209337_at	11168	AF063020	1	-0.6	0.003
PSIP1	PC4 and SFRS1 interacting protein 1	210758_at	11168	AF098482	1	-0.4	0.0098
PSMA5	proteasome (prosome, macropain) subunit, alpha type, 5	230300_at	5686	N22849	1	-0.3	0.049
PSMC3IP	PSMC3 interacting protein	213951_s_at	29893	BE964655	1	-0.4	0.02
PSMD4	proteasome (prosome, macropain) 26S subunit, non-ATPase, 4	211609_x_at	5710	U51007	1	-0.4	0.035
PSMD5-AS1	PSMD5 antisense RNA 1 (head to head)	1555892_s_at	253039	BF476087	1	-0.4	0.044
PSMF1	proteasome (prosome, macropain) inhibitor subunit 1 (PI31)	201053_s_at	9491	NM_006814	1	-0.3	0.029
PSMG4	proteasome (prosome, macropain) assembly chaperone 4	228217_s_at	389362	BF973374	1	-0.3	0.03
PSMG4	proteasome (prosome, macropain) assembly chaperone 4	242055_at	389362	AW136397	1	0.3	0.038
PSPC1	paraspeckle component 1	222611_s_at	55269	AA969958	1	-0.7	0.0076
PSPC1	paraspeckle component 1	226574_at	55269	AI872384	1	-0.4	0.029
PTBP3	polypyrimidine tract binding protein 3	224617_at	9991	AI735576	1	-0.4	0.021
PTCD3	pentatricopeptide repeat domain 3	228512_at	55037	AW138833	1	-0.4	0.045
PTDSS1	phosphatidylserine synthase 1	201433_s_at	9791	NM_014754	1	-0.3	0.045
PTGER3	prostaglandin E receptor 3 (subtype EP3)	213933_at	5733	AW242315	1	0.4	0.05
PTP4A1	protein tyrosine phosphatase type IVA, member 1	200732_s_at	7803	AL578310	1	-0.3	0.049
PTPMT1	protein tyrosine phosphatase, mitochondrial 1	225901_at	114971	AI440338	1	-0.4	0.02
PTPN1	protein tyrosine phosphatase, non-receptor type 1	217689_at	5770	BG109555	1	0.4	0.033
PTPN21	protein tyrosine phosphatase, non-receptor type 21	226380_at	11099	N21442	1	-0.3	0.042
PTPN3	protein tyrosine phosphatase, non-receptor type 3	227944_at	5774	BF437260	1	-0.4	0.026
PTPRB	protein tyrosine phosphatase, receptor type, B	230250_at	5787	AI670852	1	-0.4	0.019
PTPRS	protein tyrosine phosphatase, receptor type, S	1555666_at	5802	BC029496	1	0.3	0.03
PTX3	pentraxin 3, long	206157_at	5806	NM_002852	1	2.1	1.8e-08
PUM2	pumilio RNA-binding family member 2	235995_at	23369	BF514625	1	0.4	0.032
PWP2	PWP2 periodic tryptophan protein homolog (yeast)	209336_at	5822	U56085	1	-0.3	0.037
PXMP4	peroxisomal membrane protein 4, 24kDa	224210_s_at	11264	BC001147	1	-0.5	0.01
PYY2	peptide YY, 2 (pseudogene)	220209_at	23615	NM_021093	1	0.4	0.024
QSOX1	quiescin Q6 sulfhydryl oxidase 1	230523_at	5768	AA603472	1	-0.4	0.032
R3HDM1	R3H domain containing 1	202754_at	23518	NM_015361	1	-0.3	0.044
RAB11A	RAB11A, member RAS oncogene family	234998_at	8766	N57510	1	-0.5	0.0073
RAB11B	RAB11B, member RAS oncogene family	34478_at	9230	X79780	1	0.5	0.045
RAB11FIP3	RAB11 family interacting protein 3 (class II)	228613_at	9727	BF183535	1	-0.4	0.044
RAB11FIP4	RAB11 family interacting protein 4 (class II)	224482_s_at	84440	BC006240	1	-0.4	0.02
RAB12	RAB12, member RAS oncogene family	239891_x_at	201475	AA001052	1	-0.4	0.025
RAB22A	RAB22A, member RAS oncogene family	213405_at	57403	N95443	1	-0.4	0.025
RAB22A	RAB22A, member RAS oncogene family	218360_at	57403	NM_020673	1	-0.5	0.0052
RAB27A	RAB27A, member RAS oncogene family	222294_s_at	5873	AW971415	1	-0.5	0.023
RAB27A	RAB27A, member RAS oncogene family	235766_x_at	5873	AA743462	1	-0.4	0.025
RAB27B	RAB27B, member RAS oncogene family	207018_s_at	5874	NM_004163	1	-0.3	0.034
RAB28	RAB28, member RAS oncogene family	227003_at	9364	BG150494	1	-0.5	0.036
RAB29	RAB29, member RAS oncogene family	218699_at	8934	BG338251	1	-0.4	0.022
RAB3GAP1	RAB3 GTPase activating protein subunit 1 (catalytic)	213530_at	22930	AI040009	1	-0.3	0.05
RAB7A	RAB7A, member RAS oncogene family	227602_at	7879	BE858244	1	0.4	0.023
RABEP1	rabaptin, RAB GTPase binding effector protein 1	225092_at	9135	AL550977	1	-0.4	0.03
RABEP2	rabaptin, RAB GTPase binding effector protein 2	74694_s_at	79874	AA907940	1	-0.4	0.027
RABL2A /// RABL2B	RAB, member of RAS oncogene family-like 2A /// RAB, member of RAS oncogene family-like 2B	219151_s_at	11158 /// 11159	NM_007081	1	-0.5	0.02
RABL2A /// RABL2B	RAB, member of RAS oncogene family-like 2A /// RAB, member of RAS oncogene family-like 2B	220500_s_at	11158 /// 11159	NM_007082	1	-0.3	0.027
RACGAP1	Rac GTPase activating protein 1	222077_s_at	29127	AU153848	1	-0.6	0.0025
RAD1	RAD1 homolog (S. pombe)	204461_x_at	5810	NM_002853	1	-0.4	0.034
RAD1	RAD1 homolog (S. pombe)	235253_at	5810	AI742925	1	-0.4	0.044
RAD23B	RAD23 homolog B (S. cerevisiae)	223598_at	5887	AF262027	1	-0.4	0.011
RAD51AP1	RAD51 associated protein 1	204146_at	10635	BE966146	1	-0.6	0.0033
RALBP1	ralA binding protein 1	202845_s_at	10928	NM_006788	1	-0.3	0.037
RALGAPA1 /// RALGAPA1P	Ral GTPase activating protein, alpha subunit 1 (catalytic) /// Ral GTPase activating protein, alpha subunit 1 (catalytic) pseudogene	214855_s_at	26134 /// 253959	AL050050	1	-0.4	0.012
RAN	RAN, member RAS oncogene family	200749_at	5901	BF112006	1	-0.3	0.028
RANBP2	RAN binding protein 2	226922_at	5903	BF215302	1	-0.4	0.03
RAPGEF1	Rap guanine nucleotide exchange factor (GEF) 1	225738_at	2889	AA761259	1	-0.3	0.038
RAPGEF5	Rap guanine nucleotide exchange factor (GEF) 5	1563882_a_at	9771	AL833195	1	0.3	0.038
RAPGEF6	Rap guanine nucleotide exchange factor (GEF) 6	1555247_a_at	51735	AF394782	1	-0.5	0.011
RAPH1	Ras association (RalGDS/AF-6) and pleckstrin homology domains 1	225189_s_at	65059	AA194149	1	-0.3	0.038
RASAL2	RAS protein activator like 2	227036_at	9462	N66622	1	-0.3	0.033
RASEF	RAS and EF-hand domain containing	1553185_at	158158	NM_152573	1	-0.4	0.036
RASIP1	Ras interacting protein 1	220027_s_at	54922	NM_017805	1	0.4	0.04
RASSF8	Ras association (RalGDS/AF-6) domain family (N-terminal) member 8	225946_at	11228	BG484552	1	-0.6	0.0048
RBBP4	retinoblastoma binding protein 4	237333_at	5928	T90771	1	-0.6	0.0058
RBBP4	retinoblastoma binding protein 4	244872_at	5928	BE514107	1	-0.4	0.049
RBBP4P4 /// RBBP4P4	retinoblastoma binding protein 4 pseudogene 4 ///	217015_at	-N/A-	AL390237	1	0.4	0.028
RBBP5	retinoblastoma binding protein 5	205169_at	5929	NM_005057	1	-0.4	0.032
RBBP6	retinoblastoma binding protein 6	227635_at	5930	BF057068	1	0.4	0.029
RBL1	retinoblastoma-like 1	205296_at	5933	AL365505	1	-0.5	0.026
RBM12	RNA binding motif protein 12	212170_at	10137	BF447705	1	-0.5	0.016
RBM12B	RNA binding motif protein 12B	51228_at	389677	N36928	1	-0.4	0.038
RBM18	RNA binding motif protein 18	238963_at	92400	BG106093	1	-0.4	0.013
RBM26	RNA binding motif protein 26	218422_s_at	64062	NM_022118	1	-0.3	0.036
RBM26	RNA binding motif protein 26	227355_at	64062	AW135388	1	0.3	0.042
RBM4	RNA binding motif protein 4	227979_at	5936	AU152162	1	-0.4	0.028
RBM8A	RNA binding motif protein 8A	213852_at	9939	BG289199	1	-0.3	0.048
RBM8A	RNA binding motif protein 8A	217857_s_at	9939	NM_005105	1	-0.4	0.038
RBMY3AP	RNA binding motif protein, Y-linked, family 3, member A pseudogene	1565320_at	64593	U94386	1	0.5	0.032
RBPJ	recombination signal binding protein for immunoglobulin kappa J region	207785_s_at	3516	NM_015874	1	-0.4	0.015
RBPMS	RNA binding protein with multiple splicing	207836_s_at	11030	NM_006867	1	-0.4	0.034
RC3H2	ring finger and CCCH-type domains 2	225813_at	54542	AA524361	1	-0.3	0.04
RCAN3	RCAN family member 3	219864_s_at	11123	NM_013441	1	-0.4	0.041
RCAN3	RCAN family member 3	226272_at	11123	N25986	1	-0.4	0.021
RCAN3	RCAN family member 3	229064_s_at	11123	BE670097	1	-0.4	0.045
RCBTB1	regulator of chromosome condensation (RCC1) and BTB (POZ) domain containing protein 1	218352_at	55213	NM_018191	1	-0.4	0.045
RCCD1	RCC1 domain containing 1	226488_at	91433	AW007826	1	-0.3	0.028
RCOR3	REST corepressor 3	222605_at	55758	AI807073	1	-0.4	0.028
RDH10	retinol dehydrogenase 10 (all-trans)	1552378_s_at	157506	NM_172037	1	-0.5	0.014
RDH13	retinol dehydrogenase 13 (all-trans/9-cis)	1559190_s_at	112724	AL833150	1	-0.8	0.0019
RECQL	RecQ helicase-like	205091_x_at	5965	NM_002907	1	-0.4	0.048
RECQL	RecQ helicase-like	212917_x_at	5965	AI814728	1	-0.4	0.046
RECQL	RecQ helicase-like	212918_at	5965	AI962943	1	-0.5	0.0085
REL	v-rel avian reticuloendotheliosis viral oncogene homolog	206035_at	5966	NM_002908	1	0.5	0.031
RELL1	RELT-like 1	226430_at	768211	AI394438	1	-0.4	0.012
REPS2	RALBP1 associated Eps domain containing 2	227425_at	9185	AI984607	1	-0.4	0.047
RERE	arginine-glutamic acid dipeptide (RE) repeats	200940_s_at	473	AB036737	1	-0.4	0.02
REST	RE1-silencing transcription factor	212920_at	5978	AV682285	1	-0.4	0.04
RFC1	replication factor C (activator 1) 1, 145kDa	209085_x_at	5981	L14922	1	-0.5	0.023
RFC2	replication factor C (activator 1) 2, 40kDa	1053_at	5982	M87338	1	-0.6	0.0019
RFC2	replication factor C (activator 1) 2, 40kDa	203696_s_at	5982	NM_002914	1	-0.6	0.004
RFC3	replication factor C (activator 1) 3, 38kDa	204128_s_at	5983	NM_002915	1	-0.5	0.0081
RFC5	replication factor C (activator 1) 5, 36.5kDa	203209_at	5985	BC001866	1	-0.6	0.01
RFX7	regulatory factor X, 7	218430_s_at	64864	NM_022841	1	-0.4	0.028
RFXAP	regulatory factor X-associated protein	229431_at	5994	AI742868	1	-0.5	0.0082
RHBDD2	rhomboid domain containing 2	222995_s_at	57414	AF226732	1	-0.3	0.043
RHBDD3	rhomboid domain containing 3	204402_at	25807	NM_012265	1	-0.4	0.029
RHNO1	RAD9-HUS1-RAD1 interacting nuclear orphan 1	225836_s_at	83695	AL528840	1	-0.4	0.026
RHNO1	RAD9-HUS1-RAD1 interacting nuclear orphan 1	225837_at	83695	AL577977	1	-0.6	0.0017
RIMKLA	ribosomal modification protein rimK-like family member A	236376_at	284716	AW383197	1	0.4	0.043
RIMKLB	ribosomal modification protein rimK-like family member B	225978_at	57494	AW409794	1	-0.4	0.028
RIMKLB	ribosomal modification protein rimK-like family member B	229344_x_at	57494	AW135012	1	0.4	0.023
RMI1	RecQ mediated genome instability 1	218979_at	80010	NM_024945	1	-0.4	0.03
RMND1	required for meiotic nuclear division 1 homolog (S. cerevisiae)	220329_s_at	55005	NM_017909	1	-0.3	0.046
RNASEH1	ribonuclease H1	241343_at	246243	BF127479	1	-0.6	0.013
RNASEH2A	ribonuclease H2, subunit A	203022_at	10535	NM_006397	1	-0.4	0.024
RNF135	ring finger protein 135	223591_at	84282	BC005084	1	-0.5	0.015
RNF141	ring finger protein 141	226106_at	50862	AI307808	1	-0.4	0.02
RNF166	ring finger protein 166	227726_at	115992	BF057084	1	-0.4	0.023
RNF219	ring finger protein 219	219303_at	79596	NM_024546	1	-0.4	0.022
RNF219	ring finger protein 219	237686_at	79596	BE504672	1	0.4	0.031
RNF38	ring finger protein 38	218528_s_at	152006	NM_022781	1	-0.4	0.026
RNF41	ring finger protein 41, E3 ubiquitin protein ligase	235459_at	10193	BF114745	1	-0.3	0.028
RNPEP	arginyl aminopeptidase (aminopeptidase B)	208270_s_at	6051	NM_020216	1	-0.3	0.032
RNPS1	RNA binding protein S1, serine-rich domain	200060_s_at	10921	BC001659	1	-0.3	0.024
ROBO1	roundabout, axon guidance receptor, homolog 1 (Drosophila)	213194_at	6091	BF059159	1	-0.5	0.004
ROR1	receptor tyrosine kinase-like orphan receptor 1	232060_at	4919	AK000776	1	-0.3	0.025
RORA	RAR-related orphan receptor A	226682_at	6095	AW006185	1	-0.5	0.015
RP1-118J21.25	-N/A-	244182_at	-N/A-	AW874029	1	0.4	0.039
RP1-58B11.1	-N/A-	1562751_at	-N/A-	BC042499	1	0.4	0.036
RP11-1078H9.6	-N/A-	1556994_at	-N/A-	BC042991	1	0.5	0.016
RP11-115A15.2	-N/A-	234876_at	-N/A-	U82486	1	0.5	0.02
RP11-131L23.2	-N/A-	233485_at	-N/A-	AK001128	1	-0.5	0.0078
RP11-226L15.5	-N/A-	235532_at	-N/A-	AI631888	1	-0.4	0.02
RP11-227D13.1	-N/A-	237161_at	-N/A-	AI939343	1	0.3	0.045
RP11-247L20.4	-N/A-	237400_at	-N/A-	AI308101	1	-0.4	0.023
RP11-255C15.4	-N/A-	243740_at	-N/A-	AW970112	1	-0.4	0.04
RP11-266A24.1	-N/A-	240566_at	-N/A-	AW470559	1	0.3	0.03
RP11-285F7.2	-N/A-	228549_at	-N/A-	AI491983	1	-0.3	0.041
RP11-359K18.3	-N/A-	1563002_at	-N/A-	BC041976	1	0.4	0.05
RP11-38P22.2	-N/A-	231925_at	-N/A-	AK026659	1	-0.4	0.024
RP11-469M7.1	-N/A-	233506_at	-N/A-	N95440	1	-0.4	0.017
RP11-473I1.9	-N/A-	217682_at	-N/A-	AW503390	1	-0.5	0.016
RP11-473I1.9	-N/A-	225197_at	-N/A-	W58461	1	-0.6	0.0048
RP11-474P2.2	-N/A-	1559924_at	-N/A-	BC039429	1	0.6	0.0017
RP11-489E7.4	-N/A-	231258_at	-N/A-	AV648367	1	0.5	0.033
RP11-498C9.15	-N/A-	235203_at	-N/A-	AA398756	1	-0.5	0.015
RP11-503C24.6	-N/A-	237226_at	-N/A-	AW242899	1	0.4	0.011
RP11-61L19.3	-N/A-	242073_at	-N/A-	AA731688	1	-0.6	0.0097
RP11-73K9.2	-N/A-	1559102_at	-N/A-	BC037784	1	0.5	0.031
RP11-774O3.1 /// RP11-774O3.2	///	243408_at	-N/A-	AI252664	1	0.3	0.048
RP11-77H9.8	-N/A-	236260_at	-N/A-	AW451261	1	0.4	0.017
RP11-843B15.2	-N/A-	228691_at	-N/A-	AI694946	1	0.4	0.03
RP3-428L16.2	-N/A-	238623_at	-N/A-	AI633559	1	-0.4	0.01
RP4-773N10.4	-N/A-	228944_at	-N/A-	AI076018	1	-0.3	0.04
RP5-1136G13.2	-N/A-	228899_at	-N/A-	AI870903	1	-0.5	0.019
RPA1	replication protein A1, 70kDa	201528_at	6117	BG398414	1	-0.4	0.021
RPA1	replication protein A1, 70kDa	201529_s_at	6117	NM_002945	1	-0.3	0.038
RPA3OS	RPA3 opposite strand	226596_x_at	729852	AK027125	1	-0.3	0.029
RPE	ribulose-5-phosphate-3-epimerase	225040_s_at	6120	AV699857	1	-0.4	0.038
RPE /// RPEL1	ribulose-5-phosphate-3-epimerase /// ribulose-5-phosphate-3-epimerase-like 1	216574_s_at	6120 /// 729020	J04742	1	-0.4	0.034
RPL13 /// SNORD68	ribosomal protein L13 /// small nucleolar RNA, C/D box 68	1565759_at	6137 /// 606500	BG396520	1	-0.4	0.032
RPL18A /// SNORA68	ribosomal protein L18a /// small nucleolar RNA, H/ACA box 68	1566403_at	6142 /// 26780	Y11162	1	0.4	0.05
RPRD1A	regulation of nuclear pre-mRNA domain containing 1A	222558_at	55197	T79568	1	-0.4	0.026
RPS11	ribosomal protein S11	213350_at	6205	BF680255	1	0.7	0.032
RPS6KA2	ribosomal protein S6 kinase, 90kDa, polypeptide 2	212912_at	6196	AI992251	1	-0.3	0.034
RPS6KA5	ribosomal protein S6 kinase, 90kDa, polypeptide 5	204635_at	9252	NM_004755	1	-0.5	0.011
RPS6KB1	ribosomal protein S6 kinase, 70kDa, polypeptide 1	226660_at	6198	AI142096	1	-0.4	0.031
RPS6KC1	ribosomal protein S6 kinase, 52kDa, polypeptide 1	218909_at	26750	NM_012424	1	-0.4	0.027
RQCD1	RCD1 required for cell differentiation1 homolog (S. pombe)	213179_at	9125	BG289914	1	-0.4	0.036
RRAD	Ras-related associated with diabetes	204802_at	6236	NM_004165	1	0.6	0.01
RRAD	Ras-related associated with diabetes	204803_s_at	6236	NM_004165	1	0.6	0.006
[truncated: 815 more rows]

## Sheet: A549_GSE147507 
GeneName	Protein names	baseMean	log2FoldChange	lfcSE	pvalue	padj	status
ADAR	Double-stranded RNA-specific adenosine deaminase (DRADA) (EC 3.5.4.37) (136 kDa double-stranded RNA-binding protein) (p136) (Interferon-inducible protein 4) (IFI-4) (K88DSRBP)	6441.95	0.573074	0.105787	6.05284e-08	1.91636e-05	OK
AHNAK2	Protein AHNAK2	11372.6	-0.512013	0.119244	1.7563e-05	0.00318804	OK
APOL1	Apolipoprotein L1 (Apolipoprotein L) (Apo-L) (ApoL) (Apolipoprotein L-I) (ApoL-I)	265.072	0.699512	0.169293	3.59681e-05	0.0059616	OK
APOL6	Apolipoprotein L6 (Apolipoprotein L-VI) (ApoL-VI)	249.352	0.713665	0.196992	0.000291411	0.0342006	OK
AREG	Amphiregulin (AR) (Colorectum cell-derived growth factor) (CRDGF)	851.185	0.567688	0.128795	1.04475e-05	0.00209166	OK
B2M	Beta-2-microglobulin [Cleaved into: Beta-2-microglobulin form pI 5.3]	4968.69	0.610811	0.154534	7.73063e-05	0.0116939	OK
BCL2A1	Bcl-2-related protein A1 (Bcl-2-like protein 5) (Bcl2-L-5) (Hemopoietic-specific early response protein) (Protein BFL-1) (Protein GRS)	140.426	0.925278	0.233601	7.46578e-05	0.0114781	OK
BIVM-ERCC5	NA	237.452	0.76459	0.208936	0.000252756	0.0304515	OK
C19orf66	NA	350.833	0.762664	0.166447	4.60503e-06	0.00102775	OK
C1R	Complement C1r subcomponent (EC 3.4.21.41) (Complement component 1 subcomponent r) [Cleaved into: Complement C1r subcomponent heavy chain; Complement C1r subcomponent light chain]	1334.24	0.802654	0.131627	1.07438e-09	4.43229e-07	OK
C1S	Complement C1s subcomponent (EC 3.4.21.42) (C1 esterase) (Complement component 1 subcomponent s) [Cleaved into: Complement C1s subcomponent heavy chain; Complement C1s subcomponent light chain]	1882.18	0.712248	0.120936	3.87418e-09	1.42549e-06	OK
C3	Complement C3 (C3 and PZP-like alpha-2-macroglobulin domain-containing protein 1) [Cleaved into: Complement C3 beta chain; C3-beta-c (C3bc); Complement C3 alpha chain; C3a anaphylatoxin; Acylation stimulating protein (ASP) (C3adesArg); Complement C3b alpha' chain; Complement C3c alpha' chain fragment 1; Complement C3dg fragment; Complement C3g fragment; Complement C3d fragment; Complement C3f fra…	1410.12	0.605296	0.134621	6.91422e-06	0.00147078	OK
CCL20	C-C motif chemokine 20 (Beta-chemokine exodus-1) (CC chemokine LARC) (Liver and activation-regulated chemokine) (Macrophage inflammatory protein 3 alpha) (MIP-3-alpha) (Small-inducible cytokine A20) [Cleaved into: CCL20(1-67); CCL20(1-64); CCL20(2-70)]	245.219	1.20119	0.208889	8.9047e-09	3.03071e-06	OK
CDH1	Cadherin-1 (CAM 120/80) (Epithelial cadherin) (E-cadherin) (Uvomorulin) (CD antigen CD324) [Cleaved into: E-Cad/CTF1; E-Cad/CTF2; E-Cad/CTF3]	829.329	0.552321	0.127865	1.56336e-05	0.00287616	OK
CEBPZ	CCAAT/enhancer-binding protein zeta (CCAAT-box-binding transcription factor) (CBF) (CCAAT-binding factor)	1902.84	0.600976	0.174229	0.000561943	0.058521	OK
CFB	Complement factor B (EC 3.4.21.47) (C3/C5 convertase) (Glycine-rich beta glycoprotein) (GBG) (PBF2) (Properdin factor B) [Cleaved into: Complement factor B Ba fragment; Complement factor B Bb fragment]	345.483	1.11893	0.174814	1.54655e-10	7.26026e-08	OK
CFH	Complement factor H (H factor 1)	510.925	0.848125	0.214188	7.50368e-05	0.0114781	OK
CMPK2	UMP-CMP kinase 2, mitochondrial (EC 2.7.4.14) (Nucleoside-diphosphate kinase) (EC 2.7.4.6)	21.583	2.23046	0.548495	4.77249e-05	0.0076568	OK
COL1A1	Collagen alpha-1(I) chain (Alpha-1 type I collagen)	335.696	-0.732257	0.160074	4.77379e-06	0.00104823	OK
CP	Ceruloplasmin (EC 1.16.3.1) (Ferroxidase)	579.4	0.855272	0.184727	3.65799e-06	0.000858618	OK
CXCL1	Growth-regulated alpha protein (C-X-C motif chemokine 1) (GRO-alpha(1-73)) (Melanoma growth stimulatory activity) (MGSA) (Neutrophil-activating protein 3) (NAP-3) [Cleaved into: GRO-alpha(4-73); GRO-alpha(5-73); GRO-alpha(6-73)]	1568.46	0.586294	0.13262	9.83058e-06	0.00199752	OK
CXCL2	C-X-C motif chemokine 2 (Growth-regulated protein beta) (Gro-beta) (Macrophage inflammatory protein 2-alpha) (MIP2-alpha) [Cleaved into: GRO-beta(5-73) (GRO-beta-T) (Hematopoietic synergistic factor) (HSF) (SB-251353)]	487.685	0.71218	0.145021	9.06738e-07	0.000237391	OK
CXCL3	C-X-C motif chemokine 3 (GRO-gamma(1-73)) (Growth-regulated protein gamma) (GRO-gamma) (Macrophage inflammatory protein 2-beta) (MIP2-beta) [Cleaved into: GRO-gamma(5-73)]	483.447	0.622378	0.161649	0.000118035	0.0160692	OK
CXCL5	C-X-C motif chemokine 5 (ENA-78(1-78)) (Epithelial-derived neutrophil-activating protein 78) (Neutrophil-activating peptide ENA-78) (Small-inducible cytokine B5) [Cleaved into: ENA-78(8-78); ENA-78(9-78)]	11612.6	0.958262	0.147133	7.37156e-11	3.85986e-08	OK
CXCL8	Interleukin-8 (IL-8) (C-X-C motif chemokine 8) (Chemokine (C-X-C motif) ligand 8) (Emoctakin) (Granulocyte chemotactic protein 1) (GCP-1) (Monocyte-derived neutrophil chemotactic factor) (MDNCF) (Monocyte-derived neutrophil-activating peptide) (MONAP) (Neutrophil-activating protein 1) (NAP-1) (Protein 3-10C) (T-cell chemotactic factor) [Cleaved into: MDNCF-a (GCP/IL-8 protein IV) (IL8/NAP1 form I…	1471.68	0.747984	0.126211	3.09567e-09	1.17068e-06	OK
DANCR	Putative uncharacterized protein DANCR (Anti-differentiation ncRNA protein) (Differentiation antagonizing non-protein coding RNA) (Small nucleolar RNA host gene protein 13)	394.456	-0.588666	0.154438	0.00013803	0.0184229	OK
DDX58	Antiviral innate immune response receptor RIG-I (DEAD box protein 58) (Probable ATP-dependent RNA helicase DDX58) (EC 3.6.4.13) (RIG-I-like receptor 1) (RLR-1) (Retinoic acid-inducible gene 1 protein) (RIG-1) (Retinoic acid-inducible gene I protein) (RIG-I)	569.503	1.88191	0.194167	3.25303e-22	3.16334e-19	OK
DDX60	Probable ATP-dependent RNA helicase DDX60 (EC 3.6.4.13) (DEAD box protein 60)	265.068	2.42427	0.218254	1.15265e-28	1.42656e-25	OK
DDX60L	Probable ATP-dependent RNA helicase DDX60-like (EC 3.6.4.13) (DEAD box protein 60-like)	466.028	1.13264	0.208	5.17026e-08	1.6759e-05	OK
DKK1	Dickkopf-related protein 1 (Dickkopf-1) (Dkk-1) (hDkk-1) (SK)	5662.08	0.571859	0.126058	5.72076e-06	0.00123623	OK
DTX3L	E3 ubiquitin-protein ligase DTX3L (EC 2.3.2.27) (B-lymphoma- and BAL-associated protein) (Protein deltex-3-like) (RING-type E3 ubiquitin transferase DTX3L) (Rhysin-2) (Rhysin2)	874.133	1.45791	0.142331	1.271e-24	1.44195e-21	OK
EDN1	Endothelin-1 (Preproendothelin-1) (PPET1) [Cleaved into: Endothelin-1 (ET-1); Big endothelin-1]	2136.73	0.449872	0.121119	0.000203763	0.0249913	OK
EHF	ETS homologous factor (hEHF) (ETS domain-containing transcription factor) (Epithelium-specific Ets transcription factor 3) (ESE-3)	227.809	0.8085	0.20978	0.000116188	0.0159776	OK
EIF2AK2	Interferon-induced, double-stranded RNA-activated protein kinase (EC 2.7.11.1) (Eukaryotic translation initiation factor 2-alpha kinase 2) (eIF-2A protein kinase 2) (Interferon-inducible RNA-dependent protein kinase) (P1/eIF-2A protein kinase) (Protein kinase RNA-activated) (PKR) (Protein kinase R) (Tyrosine-protein kinase EIF2AK2) (EC 2.7.10.2) (p68 kinase)	1176.69	1.35944	0.173971	5.53375e-15	3.58745e-12	OK
ESF1	ESF1 homolog (ABT1-associated protein)	730.814	0.636544	0.175366	0.000283642	0.0336133	OK
FAM102A	Protein FAM102A (Early estrogen-induced gene 1 protein)	1706.87	-0.566861	0.129516	1.20452e-05	0.00234426	OK
FGA	Fibrinogen alpha chain [Cleaved into: Fibrinopeptide A; Fibrinogen alpha chain]	552.079	0.658066	0.143298	4.38417e-06	0.000994768	OK
FGB	Fibrinogen beta chain [Cleaved into: Fibrinopeptide B; Fibrinogen beta chain]	237.385	0.683511	0.195952	0.000486366	0.0529711	OK
FGG	Fibrinogen gamma chain	107.249	1.19302	0.286842	3.19413e-05	0.0055282	OK
FILIP1	Filamin-A-interacting protein 1 (FILIP)	324.762	0.656602	0.173945	0.000160152	0.0207649	OK
FLCN	Folliculin (BHD skin lesion fibrofolliculoma protein) (Birt-Hogg-Dube syndrome protein)	939.04	-0.52966	0.151011	0.000452456	0.0504897	OK
GBP1	Guanylate-binding protein 1 (EC 3.6.5.-) (GTP-binding protein 1) (GBP-1) (HuGBP-1) (Guanine nucleotide-binding protein 1) (Interferon-induced guanylate-binding protein 1)	59.4268	1.07544	0.308873	0.000498048	0.0538129	OK
GBP3	Guanylate-binding protein 3 (EC 3.6.5.-) (GTP-binding protein 3) (GBP-3) (Guanine nucleotide-binding protein 3)	117.681	0.889719	0.226761	8.72325e-05	0.0126339	OK
HELZ2	Helicase with zinc finger domain 2 (ATP-dependent helicase PRIC285) (Helicase with zinc finger 2, transcriptional coactivator) (PPAR-alpha-interacting complex protein 285) (PPAR-gamma DNA-binding domain-interacting protein 1) (PDIP1) (PPAR-gamma DBD-interacting protein 1) (Peroxisomal proliferator-activated receptor A-interacting complex 285 kDa protein) (EC 3.6.4.-)	1059.75	1.37933	0.150191	4.15983e-20	3.77547e-17	OK
HERC5	E3 ISG15--protein ligase HERC5 (EC 2.3.2.-) (Cyclin-E-binding protein 1) (HECT domain and RCC1-like domain-containing protein 5)	262.121	0.94416	0.178479	1.22301e-07	3.70003e-05	OK
HERC6	Probable E3 ubiquitin-protein ligase HERC6 (EC 2.3.2.26) (HECT domain and RCC1-like domain-containing protein 6) (HECT-type E3 ubiquitin transferase HERC6)	287.982	1.52174	0.183736	1.20866e-16	9.14149e-14	OK
HIF1A	Hypoxia-inducible factor 1-alpha (HIF-1-alpha) (HIF1-alpha) (ARNT-interacting protein) (Basic-helix-loop-helix-PAS protein MOP1) (Class E basic helix-loop-helix protein 78) (bHLHe78) (Member of PAS protein 1) (PAS domain-containing protein 8)	5012.18	0.540797	0.150734	0.000333543	0.0381584	OK
HSP90B1	Endoplasmin (94 kDa glucose-regulated protein) (GRP-94) (Heat shock protein 90 kDa beta member 1) (Tumor rejection antigen 1) (gp96 homolog)	16180.1	0.476834	0.131768	0.000296044	0.0344473	OK
IFI16	Gamma-interferon-inducible protein 16 (Ifi-16) (Interferon-inducible myeloid differentiation transcriptional activator)	68.3617	1.34528	0.318718	2.43334e-05	0.00430228	OK
IFI27	Interferon alpha-inducible protein 27, mitochondrial (p27) (Interferon alpha-induced 11.5 kDa protein) (Interferon-stimulated gene 12a protein) (ISG12(a)) (ISG12A)	55.4202	3.54463	0.426882	1.0106e-16	8.09311e-14	OK
IFI35	Interferon-induced 35 kDa protein (IFP 35) (Ifi-35)	602.196	1.05781	0.158944	2.82803e-11	1.54003e-08	OK
IFI44	Interferon-induced protein 44 (p44) (Microtubule-associated protein 44)	14.6462	4.59044	0.979774	2.79682e-06	0.000679926	OK
IFI6	Interferon alpha-inducible protein 6 (Interferon-induced protein 6-16) (Ifi-6-16)	1191.85	4.26953	0.163754	7.4104e-150	1.00885e-145	OK
IFIH1	Interferon-induced helicase C domain-containing protein 1 (EC 3.6.4.13) (Clinically amyopathic dermatomyositis autoantigen 140 kDa) (CADM-140 autoantigen) (Helicase with 2 CARD domains) (Helicard) (Interferon-induced with helicase C domain protein 1) (Melanoma differentiation-associated protein 5) (MDA-5) (Murabutide down-regulated protein) (RIG-I-like receptor 2) (RLR-2) (RNA helicase-DEAD box p…	190.489	1.87844	0.216907	4.71336e-18	4.01048e-15	OK
IFIT1	Interferon-induced protein with tetratricopeptide repeats 1 (IFIT-1) (Interferon-induced 56 kDa protein) (IFI-56K) (P56)	611.57	4.43253	0.209058	9.07361e-100	6.1764e-96	OK
IFIT2	Interferon-induced protein with tetratricopeptide repeats 2 (IFIT-2) (ISG-54 K) (Interferon-induced 54 kDa protein) (IFI-54K) (P54)	59.0915	1.25165	0.326273	0.000124944	0.0168415	OK
IFIT3	Interferon-induced protein with tetratricopeptide repeats 3 (IFIT-3) (CIG49) (ISG-60) (Interferon-induced 60 kDa protein) (IFI-60K) (Interferon-induced protein with tetratricopeptide repeats 4) (IFIT-4) (Retinoic acid-induced gene G protein) (P60) (RIG-G)	209.813	2.0667	0.20243	1.79948e-24	1.88447e-21	OK
IFIT5	Interferon-induced protein with tetratricopeptide repeats 5 (IFIT-5) (Interferon-induced 58 kDa protein) (Retinoic acid- and interferon-inducible 58 kDa protein) (P58)	490.563	1.08726	0.17756	9.16331e-10	3.89842e-07	OK
IFITM1	Interferon-induced transmembrane protein 1 (Dispanin subfamily A member 2a) (DSPA2a) (Interferon-induced protein 17) (Interferon-inducible protein 9-27) (Leu-13 antigen) (CD antigen CD225)	19.0794	4.22312	0.793077	1.00964e-07	3.12391e-05	OK
IFITM3	Interferon-induced transmembrane protein 3 (Dispanin subfamily A member 2b) (DSPA2b) (Interferon-inducible protein 1-8U)	150.894	0.907546	0.203832	8.49064e-06	0.00175139	OK
IFT81	Intraflagellar transport protein 81 homolog (Carnitine deficiency-associated protein expressed in ventricle 1) (CDV-1)	880.759	0.564448	0.161577	0.000476946	0.052364	OK
IRF7	Interferon regulatory factor 7 (IRF-7)	315.638	3.12645	0.218778	2.50615e-46	5.68646e-43	OK
IRF9	Interferon regulatory factor 9 (IRF-9) (IFN-alpha-responsive transcription factor subunit) (ISGF3 p48 subunit) (Interferon-stimulated gene factor 3 gamma) (ISGF-3 gamma) (Transcriptional regulator ISGF3 subunit gamma)	695.771	2.111	0.149646	3.46033e-45	6.72984e-42	OK
ISG15	Ubiquitin-like protein ISG15 (Interferon-induced 15 kDa protein) (Interferon-induced 17 kDa protein) (IP17) (Ubiquitin cross-reactive protein) (hUCRP)	451.858	3.7963	0.190385	1.82524e-88	6.21221e-85	OK
KLHL21	Kelch-like protein 21	554.522	-0.612731	0.147537	3.28053e-05	0.00558265	OK
KRT4	Keratin, type II cytoskeletal 4 (Cytokeratin-4) (CK-4) (Keratin-4) (K4) (Type-II keratin Kb4)	109.071	-1.22531	0.246607	6.74082e-07	0.000183539	OK
KTN1	Kinectin (CG-1 antigen) (Kinesin receptor)	5927.99	0.586821	0.16168	0.000283938	0.0336133	OK
KYNU	Kynureninase (EC 3.7.1.3) (L-kynurenine hydrolase)	6212.43	0.571741	0.155908	0.000245239	0.0298097	OK
LAP3	Cytosol aminopeptidase (EC 3.4.11.1) (Leucine aminopeptidase 3) (LAP-3) (Leucyl aminopeptidase) (Peptidase S) (Proline aminopeptidase) (EC 3.4.11.5) (Prolyl aminopeptidase)	1113.4	1.03241	0.126821	3.92953e-16	2.81561e-13	OK
LGALS3BP	Galectin-3-binding protein (Basement membrane autoantigen p105) (Lectin galactoside-binding soluble 3-binding protein) (Mac-2-binding protein) (MAC2BP) (Mac-2 BP) (Tumor-associated antigen 90K)	1987.46	0.553883	0.140951	8.50822e-05	0.0124549	OK
LOC284454	NA	253.803	-0.643128	0.179729	0.000345821	0.0392334	OK
MAP3K14	Mitogen-activated protein kinase kinase kinase 14 (EC 2.7.11.25) (NF-kappa-beta-inducing kinase) (HsNIK) (Serine/threonine-protein kinase NIK)	1561.54	-0.592944	0.152663	0.000102746	0.0144204	OK
MAP3K8	Mitogen-activated protein kinase kinase kinase 8 (EC 2.7.11.25) (Cancer Osaka thyroid oncogene) (Proto-oncogene c-Cot) (Serine/threonine-protein kinase cot) (Tumor progression locus 2) (TPL-2)	800.312	0.488221	0.141472	0.000558492	0.058521	OK
MMD	Monocyte to macrophage differentiation factor (Progestin and adipoQ receptor family member 11) (Progestin and adipoQ receptor family member XI)	876.051	0.718316	0.190278	0.000159946	0.0207649	OK
MX1	Interferon-induced GTP-binding protein Mx1 (Interferon-induced protein p78) (IFI-78K) (Interferon-regulated resistance GTP-binding protein MxA) (Myxoma resistance protein 1) (Myxovirus resistance protein 1) [Cleaved into: Interferon-induced GTP-binding protein Mx1, N-terminally processed]	393.315	5.19836	0.248308	2.56429e-97	1.16368e-93	OK
NCOA7	Nuclear receptor coactivator 7 (140 kDa estrogen receptor-associated protein) (Estrogen nuclear receptor coactivator 1)	1838.18	0.625033	0.143603	1.34598e-05	0.00258086	OK
NECAB2	N-terminal EF-hand calcium-binding protein 2 (EF-hand calcium-binding protein 2) (Neuronal calcium-binding protein 2) (Synaptotagmin-interacting protein 2) (Stip-2)	60.3309	-1.11896	0.301076	0.000201977	0.0249913	OK
NEU1	Sialidase-1 (EC 3.2.1.18) (Acetylneuraminyl hydrolase) (G9 sialidase) (Lysosomal sialidase) (N-acetyl-alpha-neuraminidase 1)	791.44	-0.523704	0.133178	8.4111e-05	0.0124466	OK
NFYB	Nuclear transcription factor Y subunit beta (CAAT box DNA-binding protein subunit B) (Nuclear transcription factor Y subunit B) (NF-YB)	514.941	0.702924	0.200236	0.000447294	0.0503261	OK
NPIPB5	Nuclear pore complex-interacting protein family member B5	200.916	-0.833169	0.209065	6.74222e-05	0.0105504	OK
NPTX1	Neuronal pentraxin-1 (NP1) (Neuronal pentraxin I) (NP-I)	905.283	-0.510887	0.136223	0.000176575	0.0224922	OK
NT5DC2	5'-nucleotidase domain-containing protein 2 (EC 3.1.3.-)	1303.24	-0.592219	0.150375	8.20709e-05	0.0122782	OK
NUCB2	Nucleobindin-2 (DNA-binding protein NEFA) (Epididymis secretory protein Li 109) (Gastric cancer antigen Zg4) (Prepronesfatin) [Cleaved into: Nesfatin-1]	598.094	0.700155	0.194051	0.000308459	0.0355878	OK
NUPR1	Nuclear protein 1 (Candidate of metastasis 1) (Protein p8)	112.671	-0.986183	0.238811	3.63459e-05	0.0059616	OK
OAS1	2'-5'-oligoadenylate synthase 1 ((2-5')oligo(A) synthase 1) (2-5A synthase 1) (EC 2.7.7.84) (E18/E16) (p46/p42 OAS)	1683.52	1.51072	0.11968	1.57826e-36	2.68581e-33	OK
OAS2	2'-5'-oligoadenylate synthase 2 ((2-5')oligo(A) synthase 2) (2-5A synthase 2) (EC 2.7.7.84) (p69 OAS / p71 OAS) (p69OAS / p71OAS)	23.5966	4.25275	0.723526	4.15717e-09	1.48936e-06	OK
OAS3	2'-5'-oligoadenylate synthase 3 ((2-5')oligo(A) synthase 3) (2-5A synthase 3) (EC 2.7.7.84) (p100 OAS) (p100OAS)	4756.31	1.35027	0.120065	2.41887e-29	3.29305e-26	OK
OASL	2'-5'-oligoadenylate synthase-like protein (2'-5'-OAS-related protein) (2'-5'-OAS-RP) (59 kDa 2'-5'-oligoadenylate synthase-like protein) (Thyroid receptor-interacting protein 14) (TR-interacting protein 14) (TRIP-14) (p59 OASL) (p59OASL)	44.4447	2.52928	0.421927	2.03992e-09	8.16808e-07	OK
OSGIN1	Oxidative stress-induced growth inhibitor 1 (Bone marrow stromal cell-derived growth inhibitor) (BMSC-derived growth inhibitor) (Ovary, kidney and liver protein 38) (huOKL38) (Pregnancy-induced growth inhibitor OKL38)	675.608	-0.738345	0.157589	2.79598e-06	0.000679926	OK
PAPPA-AS1	Protein PAPPAS (DIPLA1 antisense RNA 1) (DIPLA1 antisense gene protein 1) (DIPLA1-antisense expressed) (PAPPAS antisense RNA 1) (PAPPAS antisense gene protein 1) (PAPPAS-antisense expressed)	580.256	0.688063	0.183479	0.000176779	0.0224922	OK
PARP10	Protein mono-ADP-ribosyltransferase PARP10 (EC 2.4.2.-) (ADP-ribosyltransferase diphtheria toxin-like 10) (ARTD10) (Poly [ADP-ribose] polymerase 10) (PARP-10)	73.1436	1.83109	0.306823	2.40309e-09	9.34732e-07	OK
PARP12	Protein mono-ADP-ribosyltransferase PARP12 (EC 2.4.2.-) (ADP-ribosyltransferase diphtheria toxin-like 12) (ARTD12) (Poly [ADP-ribose] polymerase 12) (PARP-12) (Zinc finger CCCH domain-containing protein 1)	474.283	0.820665	0.160694	3.27318e-07	9.48107e-05	OK
PARP14	Protein mono-ADP-ribosyltransferase PARP14 (EC 2.4.2.-) (ADP-ribosyltransferase diphtheria toxin-like 8) (ARTD8) (B aggressive lymphoma protein 2) (Poly [ADP-ribose] polymerase 14) (PARP-14)	1291.97	0.957168	0.147235	7.98199e-11	4.0247e-08	OK
PARP9	Protein mono-ADP-ribosyltransferase PARP9 (EC 2.4.2.-) (ADP-ribosyltransferase diphtheria toxin-like 9) (ARTD9) (B aggressive lymphoma protein) (Poly [ADP-ribose] polymerase 9) (PARP-9)	750.667	2.12871	0.148629	1.58806e-46	4.32398e-43	OK
PDK4	[Pyruvate dehydrogenase (acetyl-transferring)] kinase isozyme 4, mitochondrial (EC 2.7.11.2) (Pyruvate dehydrogenase kinase isoform 4)	674.222	0.745744	0.190461	9.02314e-05	0.0129306	OK
PHF11	PHD finger protein 11 (BRCA1 C-terminus-associated protein) (Renal carcinoma antigen NY-REN-34)	124.101	1.06534	0.245324	1.40813e-05	0.00262607	OK
PLA2G4A	Cytosolic phospholipase A2 (cPLA2) (Phospholipase A2 group IVA) [Includes: Phospholipase A2 (EC 3.1.1.4) (Phosphatidylcholine 2-acylhydrolase); Lysophospholipase (EC 3.1.1.5)]	1415.4	0.696285	0.183329	0.000145864	0.0192796	OK
PLSCR1	Phospholipid scramblase 1 (PL scramblase 1) (Ca(2+)-dependent phospholipid scramblase 1) (Erythrocyte phospholipid scramblase) (MmTRA1b)	1546.73	1.27171	0.157577	7.00768e-16	4.77013e-13	OK
PNPT1	Polyribonucleotide nucleotidyltransferase 1, mitochondrial (EC 2.7.7.8) (3'-5' RNA exonuclease OLD35) (PNPase old-35) (Polynucleotide phosphorylase 1) (PNPase 1) (Polynucleotide phosphorylase-like protein)	1176.44	0.740509	0.160811	4.12798e-06	0.000952514	OK
PSIP1	PC4 and SFRS1-interacting protein (CLL-associated antigen KW-7) (Dense fine speckles 70 kDa protein) (DFS 70) (Lens epithelium-derived growth factor) (Transcriptional coactivator p75/p52)	1852.37	0.598778	0.144829	3.55898e-05	0.0059616	OK
PSME2	Proteasome activator complex subunit 2 (11S regulator complex subunit beta) (REG-beta) (Activator of multicatalytic protease subunit 2) (Proteasome activator 28 subunit beta) (PA28b) (PA28beta)	2149.77	0.412823	0.118024	0.00046912	0.0519236	OK
PTGS2	Prostaglandin G/H synthase 2 (EC 1.14.99.1) (Cyclooxygenase-2) (COX-2) (PHS II) (Prostaglandin H2 synthase 2) (PGH synthase 2) (PGHS-2) (Prostaglandin-endoperoxide synthase 2)	1527.79	0.803537	0.178865	7.04164e-06	0.00147484	OK
PTPN12	Tyrosine-protein phosphatase non-receptor type 12 (EC 3.1.3.48) (PTP-PEST) (Protein-tyrosine phosphatase G1) (PTPG1)	1357.7	0.657185	0.170172	0.000112518	0.0156308	OK
PTPRE	Receptor-type tyrosine-protein phosphatase epsilon (Protein-tyrosine phosphatase epsilon) (R-PTP-epsilon) (EC 3.1.3.48)	37.9036	3.02473	0.419981	5.931e-13	3.36436e-10	OK
RAP1GAP	Rap1 GTPase-activating protein 1 (Rap1GAP) (Rap1GAP1)	998.563	-0.739317	0.142301	2.04222e-07	6.04407e-05	OK
REC8	Meiotic recombination protein REC8 homolog (Cohesin Rec8p)	62.3145	1.51415	0.304358	6.52869e-07	0.000181391	OK
SAMD9	Sterile alpha motif domain-containing protein 9 (SAM domain-containing protein 9)	189.739	1.78858	0.285989	4.00027e-10	1.75676e-07	OK
SAMD9L	Sterile alpha motif domain-containing protein 9-like (SAM domain-containing protein 9-like)	64.7663	1.97353	0.349663	1.66059e-08	5.51398e-06	OK
SAMHD1	Deoxynucleoside triphosphate triphosphohydrolase SAMHD1 (dNTPase) (EC 3.1.5.-) (Dendritic cell-derived IFNG-induced protein) (DCIP) (Monocyte protein 5) (MOP-5) (SAM domain and HD domain-containing protein 1) (hSAMHD1)	683.833	1.07642	0.138941	9.38304e-15	5.8064e-12	OK
SAT1	Diamine acetyltransferase 1 (EC 2.3.1.57) (Polyamine N-acetyltransferase 1) (Putrescine acetyltransferase) (Spermidine/spermine N(1)-acetyltransferase 1) (SSAT) (SSAT-1)	3697.44	0.776384	0.13309	5.42681e-09	1.89437e-06	OK
SMARCA1	Probable global transcription activator SNF2L1 (EC 3.6.4.-) (ATP-dependent helicase SMARCA1) (Nucleosome-remodeling factor subunit SNF2L) (SWI/SNF-related matrix-associated actin-dependent regulator of chromatin subfamily A member 1)	2235.48	0.546783	0.157986	0.000538275	0.0577013	OK
SNAP25	Synaptosomal-associated protein 25 (SNAP-25) (Super protein) (SUP) (Synaptosomal-associated 25 kDa protein)	307.104	0.760332	0.174945	1.38575e-05	0.00262022	OK
SP100	Nuclear autoantigen Sp-100 (Nuclear dot-associated Sp100 protein) (Speckled 100 kDa)	909.533	0.943217	0.149378	2.71368e-10	1.23147e-07	OK
SP110	Sp110 nuclear body protein (Interferon-induced protein 41/75) (Speckled 110 kDa) (Transcriptional coactivator Sp110)	200.536	1.23353	0.191928	1.30084e-10	6.32487e-08	OK
SQSTM1	Sequestosome-1 (EBI3-associated protein of 60 kDa) (EBIAP) (p60) (Phosphotyrosine-independent ligand for the Lck SH2 domain of 62 kDa) (Ubiquitin-binding protein p62)	27656.1	-0.458228	0.123322	0.000202641	0.0249913	OK
STAT1	Signal transducer and activator of transcription 1-alpha/beta (Transcription factor ISGF-3 components p91/p84)	5185.67	1.35497	0.115795	1.25314e-31	1.89558e-28	OK
STAT2	Signal transducer and activator of transcription 2 (p113)	695.709	0.549829	0.135223	4.78058e-05	0.0076568	OK
STEAP1	Metalloreductase STEAP1 (EC 1.16.1.-) (Six-transmembrane epithelial antigen of prostate 1)	343.265	0.812587	0.202411	5.95605e-05	0.00942857	OK
SYNE1	Nesprin-1 (Enaptin) (KASH domain-containing protein 1) (KASH1) (Myocyte nuclear envelope protein 1) (Myne-1) (Nuclear envelope spectrin repeat protein 1) (Synaptic nuclear envelope protein 1) (Syne-1)	1135.98	-0.677759	0.154859	1.20536e-05	0.00234426	OK
TCIM	Transcriptional and immune response regulator (Thyroid cancer protein 1) (TC-1)	6784.43	0.575517	0.138406	3.20793e-05	0.0055282	OK
TDRD7	Tudor domain-containing protein 7 (PCTAIRE2-binding protein) (Tudor repeat associator with PCTAIRE-2) (Trap)	730.751	0.609928	0.143697	2.19049e-05	0.00392386	OK
TM4SF20	Transmembrane 4 L6 family member 20	1160.61	0.608733	0.176507	0.000563116	0.058521	OK
TRIM14	Tripartite motif-containing protein 14	880.395	1.09093	0.145583	6.70423e-14	3.96832e-11	OK
TRIM25	E3 ubiquitin/ISG15 ligase TRIM25 (EC 6.3.2.n3) (Estrogen-responsive finger protein) (RING finger protein 147) (RING-type E3 ubiquitin transferase) (EC 2.3.2.27) (RING-type E3 ubiquitin transferase TRIM25) (Tripartite motif-containing protein 25) (Ubiquitin/ISG15-conjugating enzyme TRIM25) (Zinc finger protein 147)	2695.47	0.533649	0.114145	2.93691e-06	0.000701458	OK
TRIM34	Tripartite motif-containing protein 34 (Interferon-responsive finger protein 1) (RING finger protein 21)	83.0732	1.70699	0.345427	7.74529e-07	0.000206754	OK
TYMP	Thymidine phosphorylase (TP) (EC 2.4.2.4) (Gliostatin) (Platelet-derived endothelial cell growth factor) (PD-ECGF) (TdRPase)	553.643	0.66375	0.169935	9.38682e-05	0.0133117	OK
UAP1L1	UDP-N-acetylhexosamine pyrophosphorylase-like protein 1 (EC 2.7.7.-)	467.739	-0.844373	0.176867	1.8056e-06	0.000455211	OK
UBE2L6	Ubiquitin/ISG15-conjugating enzyme E2 L6 (EC 2.3.2.23) (E2 ubiquitin-conjugating enzyme L6) (Retinoic acid-induced gene B protein) (RIG-B) (UbcH8) (Ubiquitin carrier protein L6) (Ubiquitin-protein ligase L6)	555.361	0.705494	0.145277	1.19655e-06	0.000307356	OK
UQCRB	Cytochrome b-c1 complex subunit 7 (Complex III subunit 7) (Complex III subunit VII) (QP-C) (Ubiquinol-cytochrome c reductase complex 14 kDa protein)	2899.45	0.572255	0.165506	0.000545007	0.0579666	OK
USP18	Ubl carboxyl-terminal hydrolase 18 (EC 3.4.19.-) (43 kDa ISG15-specific protease) (hUBP43) (ISG15-specific-processing protease) (Ubl thioesterase 18)	288.565	0.863802	0.170814	4.25947e-07	0.000120809	OK
WDR81	WD repeat-containing protein 81	1133.52	-0.533964	0.14352	0.000198851	0.0249913	OK

## Sheet: NHBE_GSE147507 
Gene_name	Protein names	baseMean	log2FoldChange	lfcSE	pvalue	padj	status
ABLIM1	Actin-binding LIM protein 1 (abLIM-1) (Actin-binding LIM protein family member 1) (Actin-binding double zinc finger protein) (LIMAB1) (Limatin)	1912.6	-0.287829	0.0815987	0.000419705	0.0141808	OK
ACLY	ATP-citrate synthase (EC 2.3.3.8) (ATP-citrate (pro-S-)-lyase) (ACL) (Citrate cleavage enzyme)	7554.06	0.295211	0.0770236	0.000126723	0.00555254	OK
ACSL1	Long-chain-fatty-acid--CoA ligase 1 (EC 6.2.1.3) (Acyl-CoA synthetase 1) (ACS1) (Arachidonate--CoA ligase) (EC 6.2.1.15) (Long-chain acyl-CoA synthetase 1) (LACS 1) (Long-chain acyl-CoA synthetase 2) (LACS 2) (Long-chain fatty acid-CoA ligase 2) (Palmitoyl-CoA ligase 1) (Palmitoyl-CoA ligase 2) (Phytanate--CoA ligase) (EC 6.2.1.24)	1435.96	-0.319868	0.0727412	1.09587e-05	0.000672709	OK
ADAM19	Disintegrin and metalloproteinase domain-containing protein 19 (ADAM 19) (EC 3.4.24.-) (Meltrin-beta) (Metalloprotease and disintegrin dendritic antigen marker) (MADDAM)	1018.01	0.324804	0.0927053	0.00045899	0.0151369	OK
ADAM28	Disintegrin and metalloproteinase domain-containing protein 28 (ADAM 28) (EC 3.4.24.-) (Epididymal metalloproteinase-like, disintegrin-like, and cysteine-rich protein II) (eMDC II) (Metalloproteinase-like, disintegrin-like, and cysteine-rich protein L) (MDC-L)	521.777	0.406589	0.106498	0.000134642	0.00573731	OK
ADAM8	Disintegrin and metalloproteinase domain-containing protein 8 (ADAM 8) (EC 3.4.24.-) (Cell surface antigen MS2) (CD antigen CD156a)	198.2	0.911336	0.17459	1.79044e-07	1.66928e-05	OK
ADD3	Gamma-adducin (Adducin-like protein 70)	1506.9	-0.444878	0.0972871	4.81168e-06	0.000323346	OK
ADRB2	Beta-2 adrenergic receptor (Beta-2 adrenoreceptor) (Beta-2 adrenoceptor)	595.224	0.677577	0.103786	6.63753e-11	1.08297e-08	OK
AFAP1	Actin filament-associated protein 1 (110 kDa actin filament-associated protein) (AFAP-110)	1117.15	0.309949	0.0750471	3.62666e-05	0.00200761	OK
AFAP1L1	Actin filament-associated protein 1-like 1 (AFAP1-like protein 1)	380.735	0.374462	0.106772	0.000452999	0.0150192	OK
AKAP12	A-kinase anchor protein 12 (AKAP-12) (A-kinase anchor protein 250 kDa) (AKAP 250) (Gravin) (Myasthenia gravis autoantigen)	903.777	0.302733	0.0962771	0.00166434	0.0398413	OK
ALAS1	5-aminolevulinate synthase, nonspecific, mitochondrial (ALAS-H) (EC 2.3.1.37) (5-aminolevulinic acid synthase 1) (Delta-ALA synthase 1) (Delta-aminolevulinate synthase 1)	725.539	0.3355	0.101316	0.0009282	0.0258644	OK
ALDH1A3	Aldehyde dehydrogenase family 1 member A3 (EC 1.2.1.36) (Aldehyde dehydrogenase 6) (Retinaldehyde dehydrogenase 3) (RALDH-3) (RalDH3)	14553.6	0.399426	0.0810113	8.20202e-07	6.51956e-05	OK
ALDH3A1	Aldehyde dehydrogenase, dimeric NADP-preferring (EC 1.2.1.5) (ALDHIII) (Aldehyde dehydrogenase 3) (Aldehyde dehydrogenase family 3 member A1)	843.905	-0.582809	0.144648	5.59792e-05	0.00289357	OK
ALOX15B	Arachidonate 15-lipoxygenase B (15-LOX-B) (EC 1.13.11.33) (15-lipoxygenase 2) (15-LOX-2) (Arachidonate 15-lipoxygenase type II) (Linoleate 13-lipoxygenase 15-LOb) (EC 1.13.11.-)	1418.57	0.545063	0.0955715	1.1758e-08	1.48774e-06	OK
AMPD3	AMP deaminase 3 (EC 3.5.4.6) (AMP deaminase isoform E) (Erythrocyte AMP deaminase)	442.692	0.389937	0.109473	0.000368139	0.0130055	OK
ANGPTL4	Angiopoietin-related protein 4 (Angiopoietin-like protein 4) (Hepatic fibrinogen/angiopoietin-related protein) (HFARP) [Cleaved into: ANGPTL4 N-terminal chain; ANGPTL4 C-terminal chain]	4355.89	0.510477	0.113663	7.08449e-06	0.000459935	OK
ANK3	Ankyrin-3 (ANK-3) (Ankyrin-G)	519.781	-0.346099	0.113856	0.00236731	0.0521396	OK
ANKAR	Ankyrin and armadillo repeat-containing protein	12.0294	-0.864291	0.287164	0.00261463	0.0550448	OK
ANKH	Progressive ankylosis protein homolog (ANK)	333.748	-0.373547	0.118166	0.00157124	0.0382778	OK
ANXA1	Annexin A1 (Annexin I) (Annexin-1) (Calpactin II) (Calpactin-2) (Chromobindin-9) (Lipocortin I) (Phospholipase A2 inhibitory protein) (p35)	19091.9	0.34664	0.091	0.000139397	0.0058594	OK
ANXA3	Annexin A3 (35-alpha calcimedin) (Annexin III) (Annexin-3) (Inositol 1,2-cyclic phosphate 2-phosphohydrolase) (Lipocortin III) (Placental anticoagulant protein III) (PAP-III)	4778.17	0.43167	0.10528	4.12769e-05	0.00222536	OK
ANXA6	Annexin A6 (67 kDa calelectrin) (Annexin VI) (Annexin-6) (Calphobindin-II) (CPB-II) (Chromobindin-20) (Lipocortin VI) (Protein III) (p68) (p70)	1040.28	0.332038	0.104404	0.00147116	0.0365578	OK
ANXA8L2	Annexin A8-like protein 1	924.045	0.332026	0.102269	0.00116799	0.0307497	OK
APOBEC3C	DNA dC->dU-editing enzyme APOBEC-3C (A3C) (EC 3.5.4.38) (APOBEC1-like) (Phorbolin I)	1293.71	-0.253077	0.0835795	0.00246192	0.0529996	OK
AQP3	Aquaporin-3 (AQP-3) (Aquaglyceroporin-3)	2074.54	-0.47795	0.0956417	5.81398e-07	4.71198e-05	OK
ARF4	ADP-ribosylation factor 4	1836.36	0.293407	0.0919778	0.00142283	0.0357872	OK
ARHGAP25	Rho GTPase-activating protein 25 (Rho-type GTPase-activating protein 25)	109.835	0.506772	0.168712	0.00266649	0.0558522	OK
ARHGEF2	Rho guanine nucleotide exchange factor 2 (Guanine nucleotide exchange factor H1) (GEF-H1) (Microtubule-regulated Rho-GEF) (Proliferating cell nucleolar antigen p40)	1030.35	0.336343	0.0796614	2.41975e-05	0.00138911	OK
ASS1	Argininosuccinate synthase (EC 6.3.4.5) (Citrulline--aspartate ligase)	1468.39	0.501045	0.0860695	5.83564e-09	7.78085e-07	OK
ATF4	Cyclic AMP-dependent transcription factor ATF-4 (cAMP-dependent transcription factor ATF-4) (Activating transcription factor 4) (Cyclic AMP-responsive element-binding protein 2) (CREB-2) (cAMP-responsive element-binding protein 2) (DNA-binding protein TAXREB67) (Tax-responsive enhancer element-binding protein 67) (TaxREB67)	3621.63	0.29202	0.0951086	0.00213787	0.0484637	OK
ATG9B	Autophagy-related protein 9B (APG9-like 2) (Nitric oxide synthase 3-overlapping antisense gene protein) (Protein sONE)	66.0041	-0.950923	0.210753	6.42113e-06	0.000425786	OK
ATP1B1	Sodium/potassium-transporting ATPase subunit beta-1 (Sodium/potassium-dependent ATPase subunit beta-1)	1763.35	0.335738	0.0888339	0.000157214	0.00645515	OK
B4GALT1	Beta-1,4-galactosyltransferase 1 (Beta-1,4-GalTase 1) (Beta4Gal-T1) (b4Gal-T1) (EC 2.4.1.-) (Beta-N-acetylglucosaminyl-glycolipid beta-1,4-galactosyltransferase) (Beta-N-acetylglucosaminylglycopeptide beta-1,4-galactosyltransferase) (EC 2.4.1.38) (Lactose synthase A protein) (EC 2.4.1.22) (N-acetyllactosamine synthase) (EC 2.4.1.90) (Nal synthase) (UDP-Gal:beta-GlcNAc beta-1,4-galactosyltransfera…	10184.6	0.341979	0.0703054	1.14927e-06	8.74291e-05	OK
B4GALT2	Beta-1,4-galactosyltransferase 2 (Beta-1,4-GalTase 2) (Beta4Gal-T2) (b4Gal-T2) (EC 2.4.1.-) (Beta-N-acetylglucosaminyl-glycolipid beta-1,4-galactosyltransferase) (Beta-N-acetylglucosaminylglycopeptide beta-1,4-galactosyltransferase) (EC 2.4.1.38) (Lactose synthase A protein) (EC 2.4.1.22) (N-acetyllactosamine synthase) (EC 2.4.1.90) (Nal synthase) (UDP-Gal:beta-GlcNAc beta-1,4-galactosyltransfera…	920.85	0.370025	0.10531	0.000441929	0.0147707	OK
BACE1	Beta-secretase 1 (EC 3.4.23.46) (Aspartyl protease 2) (ASP2) (Asp 2) (Beta-site amyloid precursor protein cleaving enzyme 1) (Beta-site APP cleaving enzyme 1) (Memapsin-2) (Membrane-associated aspartic protease 2)	351.468	-0.398185	0.117739	0.000719819	0.0215079	OK
BBOX1	Gamma-butyrobetaine dioxygenase (EC 1.14.11.1) (Gamma-butyrobetaine hydroxylase) (Gamma-BBH) (Gamma-butyrobetaine,2-oxoglutarate dioxygenase)	31.2742	-0.750497	0.244036	0.00210251	0.0480948	OK
BCL3	B-cell lymphoma 3 protein (BCL-3) (Proto-oncogene BCL3)	362.667	0.675076	0.149907	6.6906e-06	0.00043896	OK
BHLHE40	Class E basic helix-loop-helix protein 40 (bHLHe40) (Class B basic helix-loop-helix protein 2) (bHLHb2) (Differentially expressed in chondrocytes protein 1) (DEC1) (Enhancer-of-split and hairy-related protein 2) (SHARP-2) (Stimulated by retinoic acid gene 13 protein)	8588.29	0.1945	0.0560325	0.000518145	0.0165593	OK
BID	BH3-interacting domain death agonist (p22 BID) (BID) [Cleaved into: BH3-interacting domain death agonist p15 (p15 BID); BH3-interacting domain death agonist p13 (p13 BID); BH3-interacting domain death agonist p11 (p11 BID)]	349.699	0.527293	0.113634	3.47918e-06	0.000243739	OK
BIK	Bcl-2-interacting killer (Apoptosis inducer NBK) (BIP1) (BP4)	96.5804	0.556453	0.181199	0.00213379	0.0484596	OK
BIRC3	Baculoviral IAP repeat-containing protein 3 (EC 2.3.2.27) (Apoptosis inhibitor 2) (API2) (Cellular inhibitor of apoptosis 2) (C-IAP2) (IAP homolog C) (Inhibitor of apoptosis protein 1) (hIAP-1) (hIAP1) (RING finger protein 49) (RING-type E3 ubiquitin transferase BIRC3) (TNFR2-TRAF-signaling complex protein 1)	269.947	1.53876	0.150266	1.30838e-24	5.40797e-22	OK
BLNK	B-cell linker protein (B-cell adapter containing a SH2 domain protein) (B-cell adapter containing a Src homology 2 domain protein) (Cytoplasmic adapter protein) (Src homology 2 domain-containing leukocyte protein of 65 kDa) (SLP-65)	181.472	-0.589966	0.134659	1.18042e-05	0.000721044	OK
BMP2	Bone morphogenetic protein 2 (BMP-2) (Bone morphogenetic protein 2A) (BMP-2A)	241.412	0.732662	0.143285	3.16547e-07	2.78382e-05	OK
BPGM	Bisphosphoglycerate mutase (BPGM) (EC 5.4.2.4) (2,3-bisphosphoglycerate mutase, erythrocyte) (2,3-bisphosphoglycerate synthase) (EC 5.4.2.11) (2,3-diphosphoglycerate mutase) (DPGM) (BPG-dependent PGAM)	821.596	0.918812	0.115067	1.4049e-15	3.62934e-13	OK
BST2	Bone marrow stromal antigen 2 (BST-2) (HM1.24 antigen) (Tetherin) (CD antigen CD317)	55.3377	1.02812	0.232267	9.57897e-06	0.00059688	OK
BTG1	Protein BTG1 (B-cell translocation gene 1 protein)	1426.69	0.287358	0.0797595	0.000314802	0.0115149	OK
BTG3	Protein BTG3 (Abundant in neuroepithelium area protein) (BTG family member 3) (Protein Tob5)	324.006	0.39061	0.124095	0.0016457	0.0396246	OK
C15orf48	Normal mucosa of esophagus-specific gene 1 protein (Protein FOAP-11)	897.137	1.21122	0.0852496	8.18177e-46	1.01454e-42	OK
C15orf52	Coiled-coil domain-containing protein 9B	1715.54	0.464788	0.0886892	1.60026e-07	1.53823e-05	OK
C1orf21	Uncharacterized protein C1orf21 (Cell proliferation-inducing gene 13 protein)	505.027	-0.353401	0.11718	0.00256231	0.0544052	OK
C1orf74	UPF0739 protein C1orf74	710.543	0.336856	0.0993289	0.000695575	0.0208841	OK
C1QTNF1	Complement C1q tumor necrosis factor-related protein 1 (G protein-coupled receptor-interacting protein) (GIP)	112.5	1.60897	0.198312	4.92527e-16	1.32768e-13	OK
C1R	Complement C1r subcomponent (EC 3.4.21.41) (Complement component 1 subcomponent r) [Cleaved into: Complement C1r subcomponent heavy chain; Complement C1r subcomponent light chain]	95.8298	0.686381	0.217751	0.0016208	0.0392537	OK
C1S	Complement C1s subcomponent (EC 3.4.21.42) (C1 esterase) (Complement component 1 subcomponent s) [Cleaved into: Complement C1s subcomponent heavy chain; Complement C1s subcomponent light chain]	162.143	0.681784	0.20282	0.000775153	0.022703	OK
C2orf54	Protein mab-21-like 4	111.888	0.702055	0.229751	0.00224521	0.0502537	OK
C3	Complement C3 (C3 and PZP-like alpha-2-macroglobulin domain-containing protein 1) [Cleaved into: Complement C3 beta chain; C3-beta-c (C3bc); Complement C3 alpha chain; C3a anaphylatoxin; Acylation stimulating protein (ASP) (C3adesArg); Complement C3b alpha' chain; Complement C3c alpha' chain fragment 1; Complement C3dg fragment; Complement C3g fragment; Complement C3d fragment; Complement C3f fra…	6337.63	1.45548	0.107832	1.61482e-41	1.33492e-38	OK
C6orf223	Uncharacterized protein C6orf223	45.1709	0.832485	0.256777	0.00118672	0.0311464	OK
C8orf4	Transcriptional and immune response regulator (Thyroid cancer protein 1) (TC-1)	52.9005	1.01402	0.264778	0.000128312	0.00558727	OK
CBR1	Carbonyl reductase [NADPH] 1 (EC 1.1.1.184) (15-hydroxyprostaglandin dehydrogenase [NADP(+)]) (EC 1.1.1.197) (NADPH-dependent carbonyl reductase 1) (Prostaglandin 9-ketoreductase) (Prostaglandin-E(2) 9-reductase) (EC 1.1.1.189) (Short chain dehydrogenase/reductase family 21C member 1)	1209.84	-0.306334	0.0904109	0.000703431	0.021069	OK
CCDC138	Coiled-coil domain-containing protein 138	29.2262	-0.790711	0.263468	0.00268945	0.0561434	OK
CCDC14	Coiled-coil domain-containing protein 14	577.894	-0.440603	0.0944152	3.06148e-06	0.000218174	OK
CCDC24	Coiled-coil domain-containing protein 24	184.231	0.552932	0.162264	0.00065536	0.0199178	OK
CCL20	C-C motif chemokine 20 (Beta-chemokine exodus-1) (CC chemokine LARC) (Liver and activation-regulated chemokine) (Macrophage inflammatory protein 3 alpha) (MIP-3-alpha) (Small-inducible cytokine A20) [Cleaved into: CCL20(1-67); CCL20(1-64); CCL20(2-70)]	412.335	2.91419	0.148514	9.97422e-86	4.12268e-82	OK
CCNA2	Cyclin-A2 (Cyclin-A) (Cyclin A)	195.676	-0.460193	0.145546	0.00156783	0.0382778	OK
CCND2	G1/S-specific cyclin-D2	5349.78	-0.216741	0.0704885	0.00210609	0.0480948	OK
CCT5	T-complex protein 1 subunit epsilon (TCP-1-epsilon) (CCT-epsilon)	6843.47	0.338153	0.0946476	0.000353243	0.0125868	OK
CCT7	T-complex protein 1 subunit eta (TCP-1-eta) (CCT-eta) (HIV-1 Nef-interacting protein) [Cleaved into: T-complex protein 1 subunit eta, N-terminally processed]	5780.36	0.276017	0.0906711	0.00233336	0.0518524	OK
CD109	CD109 antigen (150 kDa TGF-beta-1-binding protein) (C3 and PZP-like alpha-2-macroglobulin domain-containing protein 7) (Platelet-specific Gov antigen) (p180) (r150) (CD antigen CD109)	6247.43	-0.437262	0.078094	2.15366e-08	2.61817e-06	OK
CD74	HLA class II histocompatibility antigen gamma chain (HLA-DR antigens-associated invariant chain) (Ia antigen-associated invariant chain) (Ii) (p33) (CD antigen CD74) [Cleaved into: Class-II-associated invariant chain peptide (CLIP)]	325.623	0.442283	0.141783	0.00181199	0.0428791	OK
CD82	CD82 antigen (C33 antigen) (IA4) (Inducible membrane protein R2) (Metastasis suppressor Kangai-1) (Suppressor of tumorigenicity 6 protein) (Tetraspanin-27) (Tspan-27) (CD antigen CD82)	1818.06	0.434381	0.118042	0.000233333	0.00901349	OK
CD86	T-lymphocyte activation antigen CD86 (Activation B7-2 antigen) (B70) (BU63) (CTLA-4 counter-receptor B7.2) (FUN-1) (CD antigen CD86)	41.1601	-0.77391	0.23019	0.000773675	0.022703	OK
CDA	Cytidine deaminase (EC 3.5.4.5) (Cytidine aminohydrolase)	939.91	0.468405	0.124903	0.000176733	0.00713841	OK
CDC25B	M-phase inducer phosphatase 2 (EC 3.1.3.48) (Dual specificity phosphatase Cdc25B)	375.988	0.458958	0.111776	4.02458e-05	0.00219845	OK
CDC42EP2	Cdc42 effector protein 2 (Binder of Rho GTPases 1)	354.22	0.693364	0.136163	3.54044e-07	3.04871e-05	OK
CDCP1	CUB domain-containing protein 1 (Membrane glycoprotein gp140) (Subtractive immunization M plus HEp3-associated 135 kDa protein) (SIMA135) (Transmembrane and associated with src kinases) (CD antigen CD318)	4169.36	0.371541	0.0686662	6.27327e-08	6.82356e-06	OK
CDH10	Cadherin-10 (T2-cadherin)	56.5925	-0.808557	0.213714	0.000154726	0.00639535	OK
CENPA	Histone H3-like centromeric protein A (Centromere autoantigen A) (Centromere protein A) (CENP-A)	38.1504	-0.738334	0.234666	0.00165344	0.0396569	OK
CENPF	Centromere protein F (CENP-F) (AH antigen) (Kinetochore protein CENPF) (Mitosin)	654.127	-0.46688	0.138758	0.000766265	0.0225693	OK
CEP55	Centrosomal protein of 55 kDa (Cep55) (Up-regulated in colon cancer 6)	356.761	-0.354263	0.106076	0.000838648	0.0239614	OK
CETN3	Centrin-3	425.034	-0.377945	0.117415	0.00128696	0.0329718	OK
CFB	Complement factor B (EC 3.4.21.47) (C3/C5 convertase) (Glycine-rich beta glycoprotein) (GBG) (PBF2) (Properdin factor B) [Cleaved into: Complement factor B Ba fragment; Complement factor B Bb fragment]	789.505	1.75798	0.128666	1.68715e-42	1.49433e-39	OK
CHKA	Choline kinase alpha (CK) (EC 2.7.1.32) (CHETK-alpha) (Ethanolamine kinase) (EK) (EC 2.7.1.82)	164.446	-0.485599	0.151907	0.00139013	0.0351071	OK
CHST2	Carbohydrate sulfotransferase 2 (EC 2.8.2.-) (Galactose/N-acetylglucosamine/N-acetylglucosamine 6-O-sulfotransferase 2) (GST-2) (N-acetylglucosamine 6-O-sulfotransferase 1) (GlcNAc6ST-1) (Gn6ST-1)	52.3892	0.718277	0.218505	0.00101176	0.027634	OK
CHURC1	Protein Churchill	921.302	-0.370172	0.122198	0.0024514	0.0529367	OK
CKAP2	Cytoskeleton-associated protein 2 (CTCL tumor antigen se20-10) (Tumor- and microtubule-associated protein)	1250.94	-0.387167	0.105154	0.000231503	0.00897072	OK
CLCA2	Calcium-activated chloride channel regulator 2 (EC 3.4.-.-) (Calcium-activated chloride channel family member 2) (hCLCA2) (Calcium-activated chloride channel protein 3) (CaCC-3) (hCaCC-3) [Cleaved into: Calcium-activated chloride channel regulator 2, 109 kDa form; Calcium-activated chloride channel regulator 2, 35 kDa form]	3968.58	-0.53276	0.0744335	8.21458e-13	1.78703e-10	OK
COL12A1	Collagen alpha-1(XII) chain	2381.5	0.352037	0.0966883	0.000271633	0.0102378	OK
COL8A1	Collagen alpha-1(VIII) chain (Endothelial collagen) [Cleaved into: Vastatin]	687.297	0.646657	0.0930144	3.5957e-12	7.1914e-10	OK
COPG1	Coatomer subunit gamma-1 (Gamma-1-coat protein) (Gamma-1-COP)	2232.58	0.290031	0.0868094	0.000834731	0.0239395	OK
CORO1A	Coronin-1A (Coronin-like protein A) (Clipin-A) (Coronin-like protein p57) (Tryptophan aspartate-containing coat protein) (TACO)	100.634	0.633959	0.206652	0.00215675	0.0487134	OK
CORO2A	Coronin-2A (IR10) (WD repeat-containing protein 2)	1068.35	0.25271	0.0842621	0.00270784	0.0564324	OK
CPA4	Carboxypeptidase A4 (EC 3.4.17.-) (Carboxypeptidase A3)	2735.98	-0.483958	0.0872236	2.88163e-08	3.37096e-06	OK
CPT1A	Carnitine O-palmitoyltransferase 1, liver isoform (CPT1-L) (EC 2.3.1.21) (Carnitine O-palmitoyltransferase I, liver isoform) (CPT I) (CPTI-L) (Carnitine palmitoyltransferase 1A)	523.139	-0.294175	0.0988019	0.00290687	0.0594804	OK
CRCT1	Cysteine-rich C-terminal protein 1 (Protein NICE-1)	110.011	0.827817	0.208719	7.30338e-05	0.00356543	OK
CREG1	Protein CREG1 (Cellular repressor of E1A-stimulated genes 1)	635.104	-0.356273	0.104146	0.000624113	0.019156	OK
CREG2	Protein CREG2 (Cellular repressor of E1A-stimulated genes 2)	82.5632	-0.735811	0.211887	0.000515325	0.0165117	OK
CSF2	Granulocyte-macrophage colony-stimulating factor (GM-CSF) (Colony-stimulating factor) (CSF) (Molgramostin) (Sargramostim)	45.5589	2.04296	0.260774	4.71758e-15	1.19384e-12	OK
CSF3	Granulocyte colony-stimulating factor (G-CSF) (Pluripoietin) (Filgrastim) (Lenograstim)	68.0741	2.94921	0.268391	4.34052e-28	2.07009e-25	OK
CSGALNACT1	Chondroitin sulfate N-acetylgalactosaminyltransferase 1 (CsGalNAcT-1) (EC 2.4.1.174) (Chondroitin beta-1,4-N-acetylgalactosaminyltransferase 1) (Beta4GalNAcT-1)	49.8962	0.778096	0.238003	0.00107823	0.0288785	OK
CSNK1E	Casein kinase I isoform epsilon (CKI-epsilon) (CKIe) (EC 2.7.11.1)	1942.43	0.344084	0.0845595	4.71879e-05	0.00252211	OK
CSRP1	Cysteine and glycine-rich protein 1 (Cysteine-rich protein 1) (CRP) (CRP1) (Epididymis luminal protein 141) (HEL-141)	1375.81	0.350862	0.0889923	8.06005e-05	0.00381468	OK
CTDSPL	CTD small phosphatase-like protein (CTDSP-like) (EC 3.1.3.16) (Carboxy-terminal domain RNA polymerase II polypeptide A small phosphatase 3) (NIF-like protein) (Nuclear LIM interactor-interacting factor 1) (NLI-interacting factor 1) (Protein YA22) (hYA22) (RBSP3) (Small C-terminal domain phosphatase 3) (SCP3) (Small CTD phosphatase 3)	1183.67	-0.359499	0.0938768	0.000128417	0.00558727	OK
CTGF	CCN family member 2 (Cellular communication network factor 2) (Connective tissue growth factor) (Hypertrophic chondrocyte-specific protein 24) (Insulin-like growth factor-binding protein 8) (IBP-8) (IGF-binding protein 8) (IGFBP-8)	703.495	-0.298348	0.0946913	0.00162854	0.0393644	OK
CTPS1	CTP synthase 1 (EC 6.3.4.2) (CTP synthetase 1) (UTP--ammonia ligase 1)	1289.31	0.334903	0.084505	7.39761e-05	0.00359727	OK
CTSC	Dipeptidyl peptidase 1 (EC 3.4.14.1) (Cathepsin C) (Cathepsin J) (Dipeptidyl peptidase I) (DPP-I) (DPPI) (Dipeptidyl transferase) [Cleaved into: Dipeptidyl peptidase 1 exclusion domain chain (Dipeptidyl peptidase I exclusion domain chain); Dipeptidyl peptidase 1 heavy chain (Dipeptidyl peptidase I heavy chain); Dipeptidyl peptidase 1 light chain (Dipeptidyl peptidase I light chain)]	3039.75	0.296737	0.0711728	3.05603e-05	0.00173035	OK
CTSH	Pro-cathepsin H [Cleaved into: Cathepsin H mini chain; Cathepsin H (EC 3.4.22.16); Cathepsin H heavy chain; Cathepsin H light chain]	1328.19	-0.509399	0.11377	7.5535e-06	0.00048783	OK
CWH43	PGAP2-interacting protein (Cell wall biogenesis protein 43 C-terminal homolog)	48.1485	0.76321	0.251046	0.00236479	0.0521396	OK
CXCL1	Growth-regulated alpha protein (C-X-C motif chemokine 1) (GRO-alpha(1-73)) (Melanoma growth stimulatory activity) (MGSA) (Neutrophil-activating protein 3) (NAP-3) [Cleaved into: GRO-alpha(4-73); GRO-alpha(5-73); GRO-alpha(6-73)]	1802.08	1.37895	0.0955739	3.44213e-47	5.3353e-44	OK
CXCL14	C-X-C motif chemokine 14 (Chemokine BRAK) (MIP-2G) (Small-inducible cytokine B14)	100.66	-1.17452	0.223144	1.41334e-07	1.37995e-05	OK
CXCL16	C-X-C motif chemokine 16 (Scavenger receptor for phosphatidylserine and oxidized low density lipoprotein) (SR-PSOX) (Small-inducible cytokine B16) (Transmembrane chemokine CXCL16)	1009.97	0.50147	0.098199	3.27878e-07	2.86316e-05	OK
CXCL2	C-X-C motif chemokine 2 (Growth-regulated protein beta) (Gro-beta) (Macrophage inflammatory protein 2-alpha) (MIP2-alpha) [Cleaved into: GRO-beta(5-73) (GRO-beta-T) (Hematopoietic synergistic factor) (HSF) (SB-251353)]	592.684	1.27719	0.157741	5.64471e-16	1.48924e-13	OK
CXCL5	C-X-C motif chemokine 5 (ENA-78(1-78)) (Epithelial-derived neutrophil-activating protein 78) (Neutrophil-activating peptide ENA-78) (Small-inducible cytokine B5) [Cleaved into: ENA-78(8-78); ENA-78(9-78)]	104.704	2.79832	0.222413	2.6641e-36	1.83527e-33	OK
CXCL6	C-X-C motif chemokine 6 (Chemokine alpha 3) (CKA-3) (Granulocyte chemotactic protein 2) (GCP-2) (Small-inducible cytokine B6) [Cleaved into: Small-inducible cytokine B6, N-processed variant 1; Small-inducible cytokine B6, N-processed variant 2; Small-inducible cytokine B6, N-processed variant 3]	28.9712	1.12163	0.273347	4.07279e-05	0.00221055	OK
CYBRD1	Cytochrome b reductase 1 (EC 1.-.-.-) (Duodenal cytochrome b) (Ferric-chelate reductase 3)	712.799	-0.397916	0.122198	0.00112867	0.0299689	OK
CYP27B1	25-hydroxyvitamin D-1 alpha hydroxylase, mitochondrial (EC 1.14.15.18) (25-OHD-1 alpha-hydroxylase) (25-hydroxyvitamin D(3) 1-alpha-hydroxylase) (VD3 1A hydroxylase) (Calcidiol 1-monooxygenase) (Cytochrome P450 subfamily XXVIIB polypeptide 1) (Cytochrome P450C1 alpha) (Cytochrome P450VD1-alpha) (Cytochrome p450 27B1)	92.5715	1.04339	0.195647	9.66106e-08	1.0067e-05	OK
CYP2B7P1	Cytochrome P450 4F3 (EC 1.14.14.1) (20-hydroxyeicosatetraenoic acid synthase) (20-HETE synthase) (CYPIVF3) (Cytochrome P450-LTB-omega) (Docosahexaenoic acid omega-hydroxylase CYP4F3) (EC 1.14.14.79) (Leukotriene-B(4) 20-monooxygenase 2) (Leukotriene-B(4) omega-hydroxylase 2) (EC 1.14.14.94)	152.192	-0.707516	0.19023	0.000199802	0.00791546	OK
CYP4F3	Dual adapter for phosphotyrosine and 3-phosphotyrosine and 3-phosphoinositide (hDAPP1) (B lymphocyte adapter protein Bam32) (B-cell adapter molecule of 32 kDa)	66.7609	-0.841232	0.234666	0.000337333	0.0120894	OK
DAPP1	D site-binding protein (Albumin D box-binding protein) (Albumin D-element-binding protein) (Tax-responsive enhancer element-binding protein 302) (TaxREB302)	1005.51	0.306192	0.0830675	0.000227751	0.00888087	OK
DBP	Epithelial discoidin domain-containing receptor 1 (Epithelial discoidin domain receptor 1) (EC 2.7.10.1) (CD167 antigen-like family member A) (Cell adhesion kinase) (Discoidin receptor tyrosine kinase) (HGK2) (Mammary carcinoma kinase 10) (MCK-10) (Protein-tyrosine kinase 3A) (Protein-tyrosine kinase RTK-6) (TRK E) (Tyrosine kinase DDR) (Tyrosine-protein kinase CAK) (CD antigen CD167a)	95.3837	-0.644615	0.173227	0.000198271	0.00787999	OK
DDR1	Probable ATP-dependent RNA helicase DDX23 (EC 3.6.4.13) (100 kDa U5 snRNP-specific protein) (DEAD box protein 23) (PRP28 homolog) (U5-100kD)	12117.6	0.265263	0.08884	0.00282792	0.0581529	OK
DDX23	Antiviral innate immune response receptor RIG-I (DEAD box protein 58) (Probable ATP-dependent RNA helicase DDX58) (EC 3.6.4.13) (RIG-I-like receptor 1) (RLR-1) (Retinoic acid-inducible gene 1 protein) (RIG-1) (Retinoic acid-inducible gene I protein) (RIG-I)	2086.86	0.237456	0.0750293	0.00155166	0.0381757	OK
DDX58	Protein DEK	398.508	0.492012	0.144156	0.000642405	0.0196203	OK
DEK	DNA damage-regulated autophagy modulator protein 1 (Damage-regulated autophagy modulator)	1216.26	-0.415621	0.0766035	5.77569e-08	6.33793e-06	OK
DRAM1	Desmocollin-2 (Cadherin family member 2) (Desmocollin-3) (Desmosomal glycoprotein II) (Desmosomal glycoprotein III)	569.061	0.6746	0.110858	1.1628e-09	1.6766e-07	OK
DSC2	Desmocollin-3 (Cadherin family member 3) (Desmocollin-4) (HT-CP)	3552.89	-0.223295	0.0628926	0.000384628	0.0133596	OK
DSC3	Desmoglein-3 (130 kDa pemphigus vulgaris antigen) (PVA) (Cadherin family member 6)	3439.41	-0.274433	0.0828433	0.000924079	0.0258076	OK
DSG3	Dystonin (230 kDa bullous pemphigoid antigen) (230/240 kDa bullous pemphigoid antigen) (Bullous pemphigoid antigen 1) (BPA) (Bullous pemphigoid antigen) (Dystonia musculorum protein) (Hemidesmosomal plaque protein)	6165.17	-0.280456	0.0744959	0.000166738	0.00680114	OK
DST	D-aminoacyl-tRNA deacylase 2 (EC 3.1.1.96) (Animalia-specific tRNA deacylase) (ATD) (D-tyrosyl-tRNA(Tyr) deacylase 2) (L-alanyl-tRNA deacylase)	18868.2	-0.379901	0.0994575	0.000133597	0.00571243	OK
DTD2	E3 ubiquitin-protein ligase DTX3L (EC 2.3.2.27) (B-lymphoma- and BAL-associated protein) (Protein deltex-3-like) (RING-type E3 ubiquitin transferase DTX3L) (Rhysin-2) (Rhysin2)	157.74	-0.547524	0.158269	0.000541291	0.0171663	OK
DTX3L	Dual oxidase 2 (EC 1.11.1.-) (EC 1.6.3.1) (Large NOX 2) (Long NOX 2) (NADH/NADPH thyroid oxidase p138-tox) (NADPH oxidase/peroxidase DUOX2) (NADPH thyroid oxidase 2) (Thyroid oxidase 2) (p138 thyroid oxidase)	834.691	0.4226	0.0812981	2.01272e-07	1.82173e-05	OK
DUOX2	Dual specificity protein phosphatase 1 (EC 3.1.3.16) (EC 3.1.3.48) (Dual specificity protein phosphatase hVH1) (Mitogen-activated protein kinase phosphatase 1) (MAP kinase phosphatase 1) (MKP-1) (Protein-tyrosine phosphatase CL100)	173.694	0.500526	0.159907	0.00174746	0.0415105	OK
DUSP1	Dual specificity protein phosphatase 10 (EC 3.1.3.16) (EC 3.1.3.48) (Mitogen-activated protein kinase phosphatase 5) (MAP kinase phosphatase 5) (MKP-5)	1605.52	0.378924	0.110585	0.000611319	0.0189481	OK
DUSP10	Dual specificity protein phosphatase 4 (EC 3.1.3.16) (EC 3.1.3.48) (Dual specificity protein phosphatase hVH2) (Mitogen-activated protein kinase phosphatase 2) (MAP kinase phosphatase 2) (MKP-2)	885.44	-0.539955	0.0998357	6.35767e-08	6.85523e-06	OK
DUSP4	Transcription factor E2F4 (E2F-4)	1397.53	0.620776	0.108556	1.07468e-08	1.38812e-06	OK
E2F4	Endothelin-1 (Preproendothelin-1) (PPET1) [Cleaved into: Endothelin-1 (ET-1); Big endothelin-1]	817.932	0.352799	0.0995198	0.000392594	0.0135227	OK
EDN1	EF-hand calcium-binding domain-containing protein 7	254.527	0.98581	0.148417	3.0914e-11	5.7214e-09	OK
EFCAB7	Ephrin-A1 (EPH-related receptor tyrosine kinase ligand 1) (LERK-1) (Immediate early response protein B61) (Tumor necrosis factor alpha-induced protein 4) (TNF alpha-induced protein 4) [Cleaved into: Ephrin-A1, secreted form]	161.561	-0.679118	0.157415	1.60183e-05	0.000945844	OK
EFNA1	Epidermal growth factor-like protein 6 (EGF-like protein 6) (MAM and EGF domains-containing gene protein)	1304.94	0.708794	0.0948146	7.68629e-14	1.7983e-11	OK
EGFL6	EH domain-containing protein 1 (PAST homolog 1) (hPAST1) (Testilin)	159.637	-0.547891	0.152701	0.000333238	0.012018	OK
EHD1	Elongation of very long chain fatty acids protein 1 (EC 2.3.1.199) (3-keto acyl-CoA synthase ELOVL1) (ELOVL fatty acid elongase 1) (ELOVL FA elongase 1) (Very long chain 3-ketoacyl-CoA synthase 1) (Very long chain 3-oxoacyl-CoA synthase 1)	936.373	0.612068	0.120425	3.72339e-07	3.16233e-05	OK
ELOVL1	Elongation of very long chain fatty acids protein 4 (EC 2.3.1.199) (3-keto acyl-CoA synthase ELOVL4) (ELOVL fatty acid elongase 4) (ELOVL FA elongase 4) (Very long chain 3-ketoacyl-CoA synthase 4) (Very long chain 3-oxoacyl-CoA synthase 4)	1669.37	0.320769	0.0846512	0.000151067	0.00626498	OK
ELOVL4	Endonuclease domain-containing 1 protein (EC 3.1.30.-)	291.5	-0.397998	0.123988	0.0013275	0.0338704	OK
ENDOD1	Gamma-enolase (EC 4.2.1.11) (2-phospho-D-glycerate hydro-lyase) (Enolase 2) (Neural enolase) (Neuron-specific enolase) (NSE)	1565.86	-0.458805	0.0813781	1.72093e-08	2.1555e-06	OK
ENO2	Ectonucleoside triphosphate diphosphohydrolase 3 (NTPDase 3) (EC 3.6.1.5) (CD39 antigen-like 3) (Ecto-ATP diphosphohydrolase 3) (Ecto-ATPDase 3) (Ecto-ATPase 3) (Ecto-apyrase 3) (HB6)	376.041	0.377762	0.121697	0.00190848	0.0443998	OK
ENTPD3	Ephrin type-A receptor 2 (EC 2.7.10.1) (Epithelial cell kinase) (Tyrosine-protein kinase receptor ECK)	1011.32	0.291393	0.0819718	0.00037828	0.0132132	OK
EPHA2	Ephrin type-A receptor 4 (EC 2.7.10.1) (EPH-like kinase 8) (EK8) (hEK8) (Tyrosine-protein kinase TYRO1) (Tyrosine-protein kinase receptor SEK)	2653.9	0.468668	0.122837	0.000135989	0.00575518	OK
EPHA4	Epithelial-stromal interaction protein 1	165.415	-0.767659	0.14755	1.96393e-07	1.79436e-05	OK
EPSTI1	ETS domain-containing transcription factor ERF (Ets2 repressor factor) (PE-2)	98.1129	0.868378	0.215261	5.48177e-05	0.00285615	OK
ERF	ERBB receptor feedback inhibitor 1 (Mitogen-inducible gene 6 protein) (MIG-6)	1450.46	-0.349686	0.105636	0.000932016	0.0259015	OK
ERRFI1	Protein C-ets-1 (p54)	2327.31	0.374384	0.0976138	0.000125381	0.00554523	OK
ETS1	Exophilin-5 (Synaptotagmin-like protein homolog lacking C2 domains b) (SlaC2-b) (Slp homolog lacking C2 domains b)	1361.89	0.477741	0.12091	7.77549e-05	0.00372263	OK
EXPH5	Exostosin-like 2 (EC 2.4.1.223) (Alpha-1,4-N-acetylhexosaminyltransferase EXTL2) (Alpha-GalNAcT EXTL2) (EXT-related protein 2) (Glucuronyl-galactosyl-proteoglycan 4-alpha-N-acetylglucosaminyltransferase) [Cleaved into: Processed exostosin-like 2]	181.521	-0.481528	0.151553	0.00148661	0.0367715	OK
EXTL2	Tissue factor (TF) (Coagulation factor III) (Thromboplastin) (CD antigen CD142)	81.8498	-0.669266	0.191404	0.000471194	0.0154572	OK
F3	Protein FAM110C	12707.5	0.408799	0.0735876	2.77185e-08	3.27343e-06	OK
FAM110C	Protein Niban 1 (Cell growth-inhibiting gene 39 protein) (Protein FAM129A)	623.857	-0.398203	0.128168	0.00189077	0.0441901	OK
FAM129A	Protein FAM167A	505.771	-0.422615	0.111737	0.000155425	0.0064029	OK
FAM167A	SMC5-SMC6 complex localization factor protein 2 (Smc5/6 localization factor 1)	47.4124	0.882627	0.230245	0.000126373	0.00555254	OK
FAM178A	Protein FAM49A	342.306	-0.538083	0.15827	0.000674412	0.0202978	OK
FAM49A	Protein FAM50A (Protein HXC-26) (Protein XAP-5)	225.065	-0.52111	0.160235	0.00114531	0.0302811	OK
FAM50A	TLC domain-containing protein 3A (Protein CT120) (Protein FAM57A)	1461.52	0.275153	0.0760345	0.000295987	0.0108909	OK
FAM57A	Protein FAM83A (Tumor antigen BJ-TSA-9) (Tumor-specific gene expressed in prostate protein)	585.596	0.385978	0.109305	0.00041366	0.0140531	OK
FAM83A	Protein LRATD1 (LRAT domain-containing 1) (Neurologic sensory protein 1) (NSE1) (Protein FAM84A)	7488.01	0.378911	0.0661551	1.01854e-08	1.32947e-06	OK
FAM84A	Protocadherin Fat 2 (hFat2) (Cadherin family member 8) (Multiple epidermal growth factor-like domains protein 1) (Multiple EGF-like domains protein 1)	759.083	-0.396157	0.130784	0.00245286	0.0529367	OK
FAT2	Protocadherin Fat 4 (hFat4) (Cadherin family member 14) (FAT tumor suppressor homolog 4) (Fat-like cadherin protein FAT-J)	6527.99	-0.359168	0.0774311	3.50849e-06	0.000244412	OK
FAT4	Farnesyl pyrophosphate synthase (FPP synthase) (FPS) (EC 2.5.1.10) ((2E,6E)-farnesyl diphosphate synthase) (Dimethylallyltranstransferase) (EC 2.5.1.1) (Farnesyl diphosphate synthase) (Geranyltranstransferase)	268.304	-0.488793	0.126765	0.000115309	0.00516184	OK
FDPS	Fasciculation and elongation protein zeta-1 (Zygin I) (Zygin-1)	4851.1	0.472103	0.0983089	1.56902e-06	0.000117204	OK
FEZ1	Leucine zipper putative tumor suppressor 1 (F37/esophageal cancer-related gene-coding leucine-zipper motif) (Fez1)	1017	0.60645	0.114815	1.27782e-07	1.27782e-05	OK
FGF1	Fibroblast growth factor 1 (FGF-1) (Acidic fibroblast growth factor) (aFGF) (Endothelial cell growth factor) (ECGF) (Heparin-binding growth factor 1) (HBGF-1)	161.776	-0.725754	0.168205	1.59819e-05	0.000945844	OK
FGFR2	Fibroblast growth factor receptor 2 (FGFR-2) (EC 2.7.10.1) (K-sam) (KGFR) (Keratinocyte growth factor receptor) (CD antigen CD332)	322.243	-0.36579	0.115141	0.00148865	0.0367715	OK
FKBP5	Peptidyl-prolyl cis-trans isomerase FKBP5 (PPIase FKBP5) (EC 5.2.1.8) (51 kDa FK506-binding protein) (51 kDa FKBP) (FKBP-51) (54 kDa progesterone receptor-associated immunophilin) (Androgen-regulated protein 6) (FF1 antigen) (FK506-binding protein 5) (FKBP-5) (FKBP54) (p54) (HSP90-binding immunophilin) (Rotamase)	2322.41	-0.417638	0.104185	6.10695e-05	0.00313342	OK
FLII	Protein flightless-1 homolog	3557.3	0.301358	0.0879644	0.000612758	0.0189481	OK
FLNB	Filamin-B (FLN-B) (ABP-278) (ABP-280 homolog) (Actin-binding-like protein) (Beta-filamin) (Filamin homolog 1) (Fh1) (Filamin-3) (Thyroid autoantigen) (Truncated actin-binding protein) (Truncated ABP)	20282	0.374816	0.0778033	1.4538e-06	0.000109255	OK
FLRT2	Leucine-rich repeat transmembrane protein FLRT2 (Fibronectin-like domain-containing leucine-rich transmembrane protein 2)	1780.03	-0.26414	0.084804	0.00184127	0.043324	OK
FLRT3	Leucine-rich repeat transmembrane protein FLRT3 (Fibronectin-like domain-containing leucine-rich transmembrane protein 3)	653.975	-0.440338	0.124774	0.000416976	0.014127	OK
FN1	Fibronectin (FN) (Cold-insoluble globulin) (CIG) [Cleaved into: Anastellin; Ugl-Y1; Ugl-Y2; Ugl-Y3]	135163	0.281344	0.0938599	0.00272218	0.0566359	OK
FNDC3B	Fibronectin type III domain-containing protein 3B (Factor for adipocyte differentiation 104) (HCV NS5A-binding protein 37)	3123.81	0.313294	0.0932682	0.000782057	0.0227641	OK
FNIP1	Folliculin-interacting protein 1	379.652	-0.376462	0.126322	0.00288091	0.0591446	OK
FOSL1	Fos-related antigen 1 (FRA-1)	1187.67	0.575794	0.096675	2.58529e-09	3.52281e-07	OK
FOXO1	Forkhead box protein O1 (Forkhead box protein O1A) (Forkhead in rhabdomyosarcoma)	345.225	-0.501244	0.125203	6.24247e-05	0.0031724	OK
FST	Follistatin (FS) (Activin-binding protein)	821.938	0.385142	0.101094	0.000139118	0.0058594	OK
FUT2	Galactoside 2-alpha-L-fucosyltransferase 2 (EC 2.4.1.344) (EC 2.4.1.69) (Alpha(1,2)FT 2) (Fucosyltransferase 2) (GDP-L-fucose:beta-D-galactoside 2-alpha-L-fucosyltransferase 2) (SE2) (Secretor blood group alpha-2-fucosyltransferase) (Secretor factor) (Se)	346.715	0.376494	0.119032	0.00156172	0.0382778	OK
FXYD5	FXYD domain-containing ion transport regulator 5 (Dysadherin)	8238.04	0.408929	0.0887433	4.06575e-06	0.000278537	OK
FYB	FYN-binding protein 1 (Adhesion and degranulation promoting adaptor protein) (ADAP) (FYB-120/130) (p120/p130) (FYN-T-binding protein) (SLAP-130) (SLP-76-associated phosphoprotein)	2328.65	-0.378572	0.0997365	0.000147212	0.00614251	OK
G0S2	G0/G1 switch protein 2 (G0/G1 switch regulatory protein 2) (Putative lymphocyte G0/G1 switch gene)	2428.08	0.804878	0.115141	2.74212e-12	5.66704e-10	OK
GABRP	Gamma-aminobutyric acid receptor subunit pi (GABA(A) receptor subunit pi)	257.564	0.452191	0.1183	0.00013216	0.00568922	OK
GBP5	Guanylate-binding protein 5 (EC 3.6.5.-) (GBP-TA antigen) (GTP-binding protein 5) (GBP-5) (Guanine nucleotide-binding protein 5)	28.6362	1.09052	0.280235	9.9644e-05	0.00455936	OK
GBP6	Guanylate-binding protein 6 (GTP-binding protein 6) (GBP-6) (Guanine nucleotide-binding protein 6)	1725.18	-0.361493	0.0933376	0.000107522	0.00486594	OK
GCLC	Glutamate--cysteine ligase catalytic subunit (EC 6.3.2.2) (GCS heavy chain) (Gamma-ECS) (Gamma-glutamylcysteine synthetase)	2087.48	-0.345661	0.0883722	9.17535e-05	0.00426121	OK
GCN1L1	eIF-2-alpha kinase activator GCN1 (GCN1 eIF-2-alpha kinase activator homolog) (GCN1-like protein 1) (General control of amino-acid synthesis 1-like protein 1) (Translational activator GCN1) (HsGCN1)	2660.24	0.229316	0.0744101	0.00205767	0.0471628	OK
GJB2	Gap junction beta-2 protein (Connexin-26) (Cx26)	2479.01	0.480801	0.0736119	6.50847e-11	1.07607e-08	OK
GJB3	Gap junction beta-3 protein (Connexin-31) (Cx31)	1422.99	0.364793	0.0938311	0.000101172	0.00459534	OK
GJB4	Gap junction beta-4 protein (Connexin-30.3) (Cx30.3)	332.43	0.381073	0.113377	0.000776296	0.022703	OK
GLRX	Glutaredoxin-1 (Thioltransferase-1) (TTase-1)	554.272	0.425181	0.140171	0.00241889	0.0525639	OK
GNA15	Guanine nucleotide-binding protein subunit alpha-15 (G alpha-15) (G-protein subunit alpha-15) (Epididymis tissue protein Li 17E) (Guanine nucleotide-binding protein subunit alpha-16) (G alpha-16) (G-protein subunit alpha-16)	1020.97	0.370193	0.118074	0.00171695	0.0409426	OK
GNS	N-acetylglucosamine-6-sulfatase (EC 3.1.6.14) (Glucosamine-6-sulfatase) (G6S)	1537.21	-0.225207	0.0744781	0.00249621	0.053552	OK
GOT2	Aspartate aminotransferase, mitochondrial (mAspAT) (EC 2.6.1.1) (EC 2.6.1.7) (Fatty acid-binding protein) (FABP-1) (Glutamate oxaloacetate transaminase 2) (Kynurenine aminotransferase 4) (Kynurenine aminotransferase IV) (Kynurenine--oxoglutarate transaminase 4) (Kynurenine--oxoglutarate transaminase IV) (Plasma membrane-associated fatty acid-binding protein) (FABPpm) (Transaminase A)	2362.22	0.228426	0.0757168	0.00255418	0.0543257	OK
GPNMB	Transmembrane glycoprotein NMB (Hematopoietic growth factor inducible neurokinin-1 type)	2057.72	-0.755012	0.124793	1.44737e-09	2.06292e-07	OK
GPSM2	G-protein-signaling modulator 2 (Mosaic protein LGN)	411.746	-0.46624	0.139395	0.000823607	0.0237139	OK
GTPBP2	GTP-binding protein 2	1605.28	0.317817	0.0795696	6.49114e-05	0.00327196	OK
GULP1	PTB domain-containing engulfment adapter protein 1 (Cell death protein 6 homolog) (PTB domain adapter protein CED-6) (Protein GULP)	159.292	-0.766875	0.175096	1.18822e-05	0.000722254	OK
HAS3	Hyaluronan synthase 3 (EC 2.4.1.212) (Hyaluronate synthase 3) (Hyaluronic acid synthase 3) (HA synthase 3)	2097.03	0.374476	0.0752836	6.55158e-07	5.27529e-05	OK
HBEGF	Proheparin-binding EGF-like growth factor [Cleaved into: Heparin-binding EGF-like growth factor (HB-EGF) (HBEGF) (Diphtheria toxin receptor) (DT-R)]	989.29	1.25338	0.100448	9.85119e-36	6.10774e-33	OK
HCAR3	Hydroxycarboxylic acid receptor 3 (G-protein coupled receptor 109B) (G-protein coupled receptor HM74) (G-protein coupled receptor HM74B) (Niacin receptor 2) (Nicotinic acid receptor 2)	474.311	0.595441	0.118621	5.17574e-07	4.25027e-05	OK
HDAC7	Histone deacetylase 7 (HD7) (EC 3.5.1.98) (Histone deacetylase 7A) (HD7a)	886.072	0.283375	0.0877441	0.0012398	0.032095	OK
HDGF	Hepatoma-derived growth factor (HDGF) (High mobility group protein 1-like 2) (HMG-1L2)	9220.15	0.404929	0.0647914	4.11169e-10	6.14276e-08	OK
HEG1	Protein HEG homolog 1	2301.44	-0.248592	0.0712793	0.00048743	0.0158493	OK
HELZ2	Helicase with zinc finger domain 2 (ATP-dependent helicase PRIC285) (Helicase with zinc finger 2, transcriptional coactivator) (PPAR-alpha-interacting complex protein 285) (PPAR-gamma DNA-binding domain-interacting protein 1) (PDIP1) (PPAR-gamma DBD-interacting protein 1) (Peroxisomal proliferator-activated receptor A-interacting complex 285 kDa protein) (EC 3.6.4.-)	195.708	0.823828	0.223099	0.000221917	0.00870749	OK
HEPHL1	Ferroxidase HEPHL1 (EC 1.16.3.1) (Hephaestin-like protein 1)	230.415	1.23791	0.131859	6.10835e-21	1.94214e-18	OK
HERC6	Probable E3 ubiquitin-protein ligase HERC6 (EC 2.3.2.26) (HECT domain and RCC1-like domain-containing protein 6) (HECT-type E3 ubiquitin transferase HERC6)	323.818	0.438779	0.11442	0.000125662	0.00554523	OK
HIVEP2	Transcription factor HIVEP2 (Human immunodeficiency virus type I enhancer-binding protein 2) (HIV-EP2) (MHC-binding protein 2) (MBP-2)	1082.89	0.310865	0.0809755	0.000123534	0.00549041	OK
HK2	Hexokinase-2 (EC 2.7.1.1) (Hexokinase type II) (HK II) (Hexokinase-B) (Muscle form hexokinase)	1854.79	0.35062	0.0766837	4.82412e-06	0.000323346	OK
HMGB3	High mobility group protein B3 (High mobility group protein 2a) (HMG-2a) (High mobility group protein 4) (HMG-4)	4892.87	0.272124	0.079779	0.000647306	0.0197214	OK
HMGCS1	Hydroxymethylglutaryl-CoA synthase, cytoplasmic (HMG-CoA synthase) (EC 2.3.3.10) (3-hydroxy-3-methylglutaryl coenzyme A synthase)	3728.37	0.334808	0.108423	0.00201524	0.0464767	OK
HMOX2	Heme oxygenase 2 (HO-2) (EC 1.14.14.18)	2169.64	0.345864	0.0868243	6.79103e-05	0.00335493	OK
HSD11B1	Corticosteroid 11-beta-dehydrogenase isozyme 1 (EC 1.1.1.146) (11-beta-hydroxysteroid dehydrogenase 1) (11-DH) (11-beta-HSD1) (Short chain dehydrogenase/reductase family 26C member 1)	1181.51	0.49258	0.118748	3.35238e-05	0.0018725	OK
HSD17B3	Testosterone 17-beta-dehydrogenase 3 (EC 1.1.1.64) (17-beta-hydroxysteroid dehydrogenase type 3) (17-beta-HSD 3) (Short chain dehydrogenase/reductase family 12C member 2) (Testicular 17-beta-hydroxysteroid dehydrogenase)	54.232	-0.796047	0.22511	0.000405845	0.0138636	OK
HYI	Putative hydroxypyruvate isomerase (EC 5.3.1.22) (Endothelial cell apoptosis protein E-CE1)	373.422	0.496228	0.113789	1.29504e-05	0.000783341	OK
HYOU1	Hypoxia up-regulated protein 1 (150 kDa oxygen-regulated protein) (ORP-150) (170 kDa glucose-regulated protein) (GRP-170)	4097.92	0.244723	0.071511	0.000621235	0.0191149	OK
ICAM1	Intercellular adhesion molecule 1 (ICAM-1) (Major group rhinovirus receptor) (CD antigen CD54)	1885.25	1.74707	0.138718	2.26832e-36	1.65454e-33	OK
IDI1	Isopentenyl-diphosphate Delta-isomerase 1 (EC 5.3.3.2) (Isopentenyl pyrophosphate isomerase 1) (IPP isomerase 1) (IPPI1)	2301.24	0.406277	0.0811039	5.46165e-07	4.45555e-05	OK
IER3	Radiation-inducible immediate-early gene IEX-1 (Differentiation-dependent gene 2 protein) (Protein DIF-2) (Immediate early protein GLY96) (Immediate early response 3 protein) (PACAP-responsive gene 1 protein) (Protein PRG1)	5053.6	0.922875	0.102471	2.13377e-19	6.15318e-17	OK
IFI35	Interferon-induced 35 kDa protein (IFP 35) (Ifi-35)	42.8228	0.747124	0.236283	0.00156694	0.0382778	OK
IFI44	Interferon-induced protein 44 (p44) (Microtubule-associated protein 44)	280.864	0.845419	0.12119	3.03714e-12	6.17385e-10	OK
IFIH1	Interferon-induced helicase C domain-containing protein 1 (EC 3.6.4.13) (Clinically amyopathic dermatomyositis autoantigen 140 kDa) (CADM-140 autoantigen) (Helicase with 2 CARD domains) (Helicard) (Interferon-induced with helicase C domain protein 1) (Melanoma differentiation-associated protein 5) (MDA-5) (Murabutide down-regulated protein) (RIG-I-like receptor 2) (RLR-2) (RNA helicase-DEAD box p…	298.72	0.646252	0.116258	2.71655e-08	3.23897e-06	OK
IFITM1	Interferon-induced transmembrane protein 1 (Dispanin subfamily A member 2a) (DSPA2a) (Interferon-induced protein 17) (Interferon-inducible protein 9-27) (Leu-13 antigen) (CD antigen CD225)	113.599	1.40409	0.194189	4.81133e-13	1.06537e-10	OK
IFITM10	Interferon-induced transmembrane protein 10 (Dispanin subfamily A member 3) (DSPA3)	194.443	-1.33347	0.204593	7.14051e-11	1.1499e-08	OK
IFITM3	Interferon-induced transmembrane protein 3 (Dispanin subfamily A member 2b) (DSPA2b) (Interferon-inducible protein 1-8U)	2124.17	0.732501	0.135905	7.0536e-08	7.54006e-06	OK
IFNGR1	Interferon gamma receptor 1 (IFN-gamma receptor 1) (IFN-gamma-R1) (CDw119) (Interferon gamma receptor alpha-chain) (IFN-gamma-R-alpha) (CD antigen CD119)	1238.13	0.400177	0.11054	0.000294363	0.0108634	OK
IGFBP3	Insulin-like growth factor-binding protein 3 (IBP-3) (IGF-binding protein 3) (IGFBP-3)	2005.92	0.430412	0.132772	0.00118808	0.0311464	OK
IKBKE	Inhibitor of nuclear factor kappa-B kinase subunit epsilon (I-kappa-B kinase epsilon) (IKK-E) (IKK-epsilon) (IkBKE) (EC 2.7.11.10) (Inducible I kappa-B kinase) (IKK-i)	341.78	0.669458	0.130477	2.88423e-07	2.55461e-05	OK
IL1B	Interleukin-1 beta (IL-1 beta) (Catabolin)	4401.2	1.03684	0.0915872	1.0357e-29	5.13708e-27	OK
IL1RN	Interleukin-1 receptor antagonist protein (IL-1RN) (IL-1ra) (IRAP) (ICIL-1RA) (IL1 inhibitor) (Anakinra)	7083.93	0.319923	0.101454	0.00161397	0.0391647	OK
IL32	Interleukin-32 (IL-32) (Natural killer cells protein 4) (Tumor necrosis factor alpha-inducing factor)	858.468	1.17625	0.110205	1.35725e-26	6.01068e-24	OK
IL36G	Interleukin-36 gamma (IL-1-related protein 2) (IL-1RP2) (Interleukin-1 epsilon) (IL-1 epsilon) (Interleukin-1 family member 9) (IL-1F9) (Interleukin-1 homolog 1) (IL-1H1)	271.448	2.53125	0.149633	3.40548e-64	1.0557e-60	OK
IL6	Interleukin-6 (IL-6) (B-cell stimulatory factor 2) (BSF-2) (CTL differentiation factor) (CDF) (Hybridoma growth factor) (Interferon beta-2) (IFN-beta-2)	114.424	2.39044	0.217614	4.5251e-28	2.07819e-25	OK
IL6R	Interleukin-6 receptor subunit alpha (IL-6 receptor subunit alpha) (IL-6R subunit alpha) (IL-6R-alpha) (IL-6RA) (IL-6R 1) (Membrane glycoprotein 80) (gp80) (CD antigen CD126)	665.056	-0.558592	0.12414	6.80483e-06	0.000444105	OK
IL7R	Interleukin-7 receptor subunit alpha (IL-7 receptor subunit alpha) (IL-7R subunit alpha) (IL-7R-alpha) (IL-7RA) (CDw127) (CD antigen CD127)	111.022	0.774118	0.189712	4.49396e-05	0.00241234	OK
IL8	Interleukin-8 (IL-8) (C-X-C motif chemokine 8) (Chemokine (C-X-C motif) ligand 8) (Emoctakin) (Granulocyte chemotactic protein 1) (GCP-1) (Monocyte-derived neutrophil chemotactic factor) (MDNCF) (Monocyte-derived neutrophil-activating peptide) (MONAP) (Neutrophil-activating protein 1) (NAP-1) (Protein 3-10C) (T-cell chemotactic factor) [Cleaved into: MDNCF-a (GCP/IL-8 protein IV) (IL8/NAP1 form I…	2374.64	2.26165	0.100217	9.03138e-113	1.11989e-108	OK
INHBA	Inhibin beta A chain (Activin beta-A chain) (Erythroid differentiation protein) (EDF)	1217.27	1.7398	0.118901	1.74809e-48	3.09662e-45	OK
IRAK2	Interleukin-1 receptor-associated kinase-like 2 (IRAK-2)	190.416	1.48855	0.148426	1.13743e-23	4.14826e-21	OK
IRAK3	Interleukin-1 receptor-associated kinase 3 (IRAK-3) (EC 2.7.11.1) (IL-1 receptor-associated kinase M) (IRAK-M)	134.217	0.657934	0.185581	0.000392213	0.0135227	OK
IRF2BPL	Probable E3 ubiquitin-protein ligase IRF2BPL (EC 2.3.2.27) (Enhanced at puberty protein 1) (Interferon regulatory factor 2-binding protein-like)	171.466	-0.694787	0.148699	2.97625e-06	0.000213326	OK
IRF7	Interferon regulatory factor 7 (IRF-7)	54.9047	1.19436	0.244317	1.01561e-06	7.82208e-05	OK
IRF9	Interferon regulatory factor 9 (IRF-9) (IFN-alpha-responsive transcription factor subunit) (ISGF3 p48 subunit) (Interferon-stimulated gene factor 3 gamma) (ISGF-3 gamma) (Transcriptional regulator ISGF3 subunit gamma)	677.301	1.22262	0.0889197	5.11032e-43	5.28066e-40	OK
ISG20L2	Interferon-stimulated 20 kDa exonuclease-like 2 (EC 3.1.-.-)	862.781	0.36267	0.0968139	0.000179638	0.00723013	OK
ITGA5	Integrin alpha-5 (CD49 antigen-like family member E) (Fibronectin receptor subunit alpha) (Integrin alpha-F) (VLA-5) (CD antigen CD49e) [Cleaved into: Integrin alpha-5 heavy chain; Integrin alpha-5 light chain]	5034.53	0.506859	0.0764608	3.3797e-11	5.94768e-09	OK
ITGB3	Integrin beta-3 (Platelet membrane glycoprotein IIIa) (GPIIIa) (CD antigen CD61)	91.4677	1.05225	0.188106	2.2203e-08	2.67298e-06	OK
KCNMA1	Calcium-activated potassium channel subunit alpha-1 (BK channel) (BKCA alpha) (Calcium-activated potassium channel, subfamily M subunit alpha-1) (K(VCA)alpha) (KCa1.1) (Maxi K channel) (MaxiK) (Slo-alpha) (Slo1) (Slowpoke homolog) (Slo homolog) (hSlo)	442.115	-0.444467	0.106595	3.05055e-05	0.00173035	OK
KCTD11	BTB/POZ domain-containing protein KCTD11 (KCASH1 protein) (Potassium channel tetramerization domain-containing protein 11) (RING-type E3 ubiquitin transferase subunit KCTD11)	4014.06	0.449903	0.0657185	7.59892e-12	1.49566e-09	OK
KIAA0100	Protein KIAA0100 (Antigen MLAA-22) (Breast cancer-overexpressed gene 1 protein)	4012.25	0.289387	0.0889137	0.00113512	0.0300759	OK
KIAA0247	Sushi domain-containing protein 6 (Drug-activated gene overexpressed protein)	1061.69	0.43882	0.0832668	1.36385e-07	1.35294e-05	OK
KIF3C	Kinesin-like protein KIF3C	1190.72	0.289439	0.0943354	0.00215356	0.0487134	OK
KIRREL	Kin of IRRE-like protein 1 (Kin of irregular chiasm-like protein 1) (Nephrin-like protein 1)	615.824	0.297242	0.0909201	0.00107829	0.0288785	OK
KLHDC8B	Kelch domain-containing protein 8B	433.741	-0.405125	0.112916	0.000333403	0.012018	OK
KRT15	Keratin, type I cytoskeletal 15 (Cytokeratin-15) (CK-15) (Keratin-15) (K15)	10589.3	-0.888978	0.121689	2.76635e-13	6.35237e-11	OK
KRT16	Keratin, type I cytoskeletal 16 (Cytokeratin-16) (CK-16) (Keratin-16) (K16)	1836.72	0.409148	0.136619	0.00274622	0.0568499	OK
KRT17	Keratin, type I cytoskeletal 17 (39.1) (Cytokeratin-17) (CK-17) (Keratin-17) (K17)	40544.9	0.463905	0.0863328	7.72436e-08	8.1865e-06	OK
KRT23	Keratin, type I cytoskeletal 23 (Cytokeratin-23) (CK-23) (Keratin-23) (K23)	907.427	0.568464	0.108062	1.4365e-07	1.39161e-05	OK
KRT24	Keratin, type I cytoskeletal 24 (Cytokeratin-24) (CK-24) (Keratin-24) (K24) (Type I keratin-24)	33.5844	1.29156	0.256888	4.96336e-07	4.10304e-05	OK
KRT6B	Keratin, type II cytoskeletal 6B (Cytokeratin-6B) (CK-6B) (Keratin-6B) (K6B) (Type-II keratin Kb10)	2804.14	1.4925	0.108978	1.08034e-42	1.03047e-39	OK
KRT75	Keratin, type II cytoskeletal 75 (Cytokeratin-75) (CK-75) (Keratin-6 hair follicle) (hK6hf) (Keratin-75) (K75) (Type II keratin-K6hf) (Type-II keratin Kb18)	32.8583	0.860428	0.256104	0.000780309	0.0227641	OK
LAMB3	Laminin subunit beta-3 (Epiligrin subunit bata) (Kalinin B1 chain) (Kalinin subunit beta) (Laminin B1k chain) (Laminin-5 subunit beta) (Nicein subunit beta)	29136.4	0.369982	0.0888399	3.11905e-05	0.00175801	OK
LAMC2	Laminin subunit gamma-2 (Cell-scattering factor 140 kDa subunit) (CSF 140 kDa subunit) (Epiligrin subunit gamma) (Kalinin subunit gamma) (Kalinin/nicein/epiligrin 100 kDa subunit) (Ladsin 140 kDa subunit) (Laminin B2t chain) (Laminin-5 subunit gamma) (Large adhesive scatter factor 140 kDa subunit) (Nicein subunit gamma)	103845	0.307428	0.0774601	7.222e-05	0.00353964	OK
LAP3	Cytosol aminopeptidase (EC 3.4.11.1) (Leucine aminopeptidase 3) (LAP-3) (Leucyl aminopeptidase) (Peptidase S) (Proline aminopeptidase) (EC 3.4.11.5) (Prolyl aminopeptidase)	807.083	0.352561	0.105598	0.000841699	0.0239933	OK
LCA5	Lebercilin (Leber congenital amaurosis 5 protein)	189.078	-0.527439	0.145411	0.000286472	0.0106796	OK
LDLR	Low-density lipoprotein receptor (LDL receptor)	6680.43	0.391748	0.0768342	3.42152e-07	2.96691e-05	OK
LETM1	Mitochondrial proton/calcium exchanger protein (Leucine zipper-EF-hand-containing transmembrane protein 1)	1136.96	0.316571	0.0894129	0.000399293	0.0137153	OK
LGALS8	Galectin-8 (Gal-8) (Po66 carbohydrate-binding protein) (Po66-CBP) (Prostate carcinoma tumor antigen 1) (PCTA-1)	2533.64	-0.265877	0.0708501	0.000174962	0.00708998	OK
LGALS9	Galectin-9 (Gal-9) (Ecalectin) (Tumor antigen HOM-HD-21)	67.2465	0.733558	0.222369	0.000970875	0.0266937	OK
LIF	Leukemia inhibitory factor (LIF) (Differentiation-stimulating factor) (D factor) (Melanoma-derived LPL inhibitor) (MLPLI) (Emfilermin)	972.559	1.26751	0.101103	4.69402e-36	3.06347e-33	OK
LOC100294145	Lysophospholipid acyltransferase 5 (LPLAT 5) (EC 2.3.1.-) (1-acylglycerophosphocholine O-acyltransferase) (EC 2.3.1.23) (1-acylglycerophosphoserine O-acyltransferase) (EC 2.3.1.n6) (Lysophosphatidylcholine acyltransferase) (LPCAT) (Lyso-PC acyltransferase) (Lysophosphatidylcholine acyltransferase 3) (Lyso-PC acyltransferase 3) (Lysophosphatidylserine acyltransferase) (LPSAT) (Lyso-PS acyltransfer…	99.5534	-0.587922	0.181941	0.00123188	0.0319603	OK
LOC100862671	NA	419.662	0.405542	0.102797	7.97784e-05	0.00380273	OK
LOC645638	NA	26.9837	0.884505	0.283598	0.00181546	0.0428795	OK
LPCAT3	NA	687.289	-0.341522	0.0961761	0.000383755	0.0133596	OK
LRMP	Lymphoid-restricted membrane protein (Protein Jaw1) [Cleaved into: Processed lymphoid-restricted membrane protein]	96.2947	-0.762621	0.184946	3.73185e-05	0.00204756	OK
LRRC16A	F-actin-uncapping protein LRRC16A (CARMIL homolog) (Capping protein regulator and myosin 1 linker protein 1) (Capping protein, Arp2/3 and myosin-I linker homolog 1) (Capping protein, Arp2/3 and myosin-I linker protein 1) (Leucine-rich repeat-containing protein 16A)	1294.18	-0.24723	0.0813028	0.00235904	0.0521396	OK
LSS	Lanosterol synthase (EC 5.4.99.7) (2,3-epoxysqualene--lanosterol cyclase) (Oxidosqualene--lanosterol cyclase) (OSC) (hOSC)	2250.1	0.293169	0.0830102	0.000412864	0.0140531	OK
LTB	Lymphotoxin-beta (LT-beta) (Tumor necrosis factor C) (TNF-C) (Tumor necrosis factor ligand superfamily member 3)	27.1111	1.12114	0.264139	2.19052e-05	0.00126337	OK
LTBP2	Latent-transforming growth factor beta-binding protein 2 (LTBP-2)	2585.83	0.30941	0.085387	0.000290509	0.0107854	OK
LXN	Latexin (Endogenous carboxypeptidase inhibitor) (ECI) (Protein MUM) (Tissue carboxypeptidase inhibitor) (TCI)	253.236	-0.453765	0.137831	0.000994155	0.0272733	OK
LY6D	Lymphocyte antigen 6D (Ly-6D) (E48 antigen)	256.134	-0.62079	0.160512	0.000109931	0.00493895	OK
LYN	Tyrosine-protein kinase Lyn (EC 2.7.10.2) (Lck/Yes-related novel protein tyrosine kinase) (V-yes-1 Yamaguchi sarcoma viral related oncogene homolog) (p53Lyn) (p56Lyn)	646.635	0.37328	0.108254	0.000564338	0.0177159	OK
MAF	Transcription factor Maf (Proto-oncogene c-Maf) (V-maf musculoaponeurotic fibrosarcoma oncogene homolog)	745.234	-0.775668	0.147262	1.38472e-07	1.36274e-05	OK
MAFF	Transcription factor MafF (U-Maf) (V-maf musculoaponeurotic fibrosarcoma oncogene homolog F)	447.502	1.08504	0.117655	2.90977e-20	8.59075e-18	OK
MAOA	Amine oxidase [flavin-containing] A (EC 1.4.3.4) (Monoamine oxidase type A) (MAO-A)	2307.35	0.304902	0.0924015	0.000967714	0.0266659	OK
MAP2K1	Dual specificity mitogen-activated protein kinase kinase 1 (MAP kinase kinase 1) (MAPKK 1) (MKK1) (EC 2.7.12.2) (ERK activator kinase 1) (MAPK/ERK kinase 1) (MEK 1)	1008.94	0.257075	0.0851532	0.00253634	0.0541319	OK
MAP3K8	Mitogen-activated protein kinase kinase kinase 8 (EC 2.7.11.25) (Cancer Osaka thyroid oncogene) (Proto-oncogene c-Cot) (Serine/threonine-protein kinase cot) (Tumor progression locus 2) (TPL-2)	70.3343	0.920188	0.193485	1.9761e-06	0.000143296	OK
MAP7D2	MAP7 domain-containing protein 2	54.2747	-1.12964	0.224479	4.84695e-07	4.03371e-05	OK
MARCKSL1	MARCKS-related protein (MARCKS-like protein 1) (Macrophage myristoylated alanine-rich C kinase substrate) (Mac-MARCKS) (MacMARCKS)	1191.99	0.296463	0.0862727	0.000589609	0.0184625	OK
MAST4	Microtubule-associated serine/threonine-protein kinase 4 (EC 2.7.11.1)	1520.52	0.283508	0.0891953	0.00148036	0.036713	OK
MCOLN3	Mucolipin-3 (Transient receptor potential channel mucolipin 3) (TRPML3)	211.524	-0.555233	0.141624	8.83725e-05	0.00411962	OK
MEF2A	Myocyte-specific enhancer factor 2A (Serum response factor-like protein 1)	443.345	-0.310069	0.0993973	0.00181162	0.0428791	OK
METTL7A	Methyltransferase-like protein 7A	149.499	-0.947713	0.159564	2.86093e-09	3.85603e-07	OK
MFSD2A	(Major facilitator superfamily domain-containing protein 2A)	489.806	0.467008	0.124691	0.00018017	0.00723013	OK
MGC12916	NA	20.3101	0.941767	0.274989	0.000615377	0.0189818	OK
MICA	MHC class I polypeptide-related sequence A (MIC-A)	1173.83	0.282748	0.0910145	0.00189234	0.0441901	OK
MICAL2	[F-actin]-monooxygenase MICAL2 (EC 1.14.13.225) (Molecule interacting with CasL protein 2) (MICAL-2)	748.164	0.405117	0.109463	0.000214795	0.00845541	OK
MICALCL	MICAL C-terminal-like protein (Mical-cL) (ERK2-binding testicular protein 1) (Ebitein-1)	290.374	0.419258	0.124423	0.000752689	0.0222753	OK
MIR221		49.0725	-0.806609	0.242954	0.00090017	0.0252536	OK
MLKL	Mixed lineage kinase domain-like protein (hMLKL)	188.865	0.46328	0.143209	0.00121643	0.0317553	OK
MLLT11		1237.23	0.304508	0.0982	0.00192939	0.0446352	OK
MMP1	Interstitial collagenase (EC 3.4.24.7) (Fibroblast collagenase) (Matrix metalloproteinase-1) (MMP-1) [Cleaved into: 22 kDa interstitial collagenase; 27 kDa interstitial collagenase]	512.537	0.732265	0.122601	2.33305e-09	3.21442e-07	OK
MMP10	Stromelysin-2 (SL-2) (EC 3.4.24.22) (Matrix metalloproteinase-10) (MMP-10) (Transin-2)	199.79	0.509281	0.145875	0.000480834	0.0156904	OK
MMP13	Collagenase 3 (EC 3.4.24.-) (Matrix metalloproteinase-13) (MMP-13)	70.5125	0.856918	0.236197	0.000285647	0.0106796	OK
MN1	Transcriptional activator MN1 (Probable tumor suppressor protein MN1)	274.485	-0.583342	0.122169	1.79819e-06	0.000131938	OK
MOGS	Mannosyl-oligosaccharide glucosidase (EC 3.2.1.106) (Processing A-glucosidase I)	1057.69	0.312807	0.091566	0.000635043	0.0194433	OK
MRGPRX3	Mas-related G-protein coupled receptor member X3 (Sensory neuron-specific G-protein coupled receptor 1/2)	26.4557	1.25514	0.272605	4.13996e-06	0.000282063	OK
MSN	Moesin (Membrane-organizing extension spike protein)	19989.5	0.249672	0.0793373	0.00164972	0.0396444	OK
MTSS1	Protein MTSS 1 (Metastasis suppressor YGL-1) (Metastasis suppressor protein 1) (Missing in metastasis protein)	1851.75	0.316299	0.066074	1.6926e-06	0.00012493	OK
MTUS1	Microtubule-associated tumor suppressor 1 (AT2 receptor-binding protein) (Angiotensin-II type 2 receptor-interacting protein) (Mitochondrial tumor suppressor 1)	1285.25	-0.375913	0.10592	0.000386658	0.0133926	OK
MUC21	Mucin-21 (MUC-21) (Epiglycanin)	25.5097	0.799115	0.260039	0.00211874	0.0482062	OK
MXRA5	Matrix-remodeling-associated protein 5 (Adhesion protein with leucine-rich repeats and immunoglobulin domains related to perlecan) (Adlican)	721.623	-0.855394	0.12906	3.40553e-11	5.94768e-09	OK
MYC	Myc proto-oncogene protein (Class E basic helix-loop-helix protein 39) (bHLHe39) (Proto-oncogene c-Myc) (Transcription factor p64)	4069.38	0.311302	0.0850894	0.000253673	0.00964891	OK
MYCL1	Protein L-Myc (Class E basic helix-loop-helix protein 38) (bHLHe38) (Protein L-Myc-1) (V-myc myelocytomatosis viral oncogene homolog)	242.487	-0.446104	0.132891	0.000788171	0.0228883	OK
MYEOV	Myeloma-overexpressed gene protein (Oncogene in multiple myeloma)	68.7862	1.08357	0.210087	2.4996e-07	2.22986e-05	OK
MYLK	Myosin light chain kinase, smooth muscle (MLCK) (smMLCK) (EC 2.7.11.18) (Kinase-related protein) (KRP) (Telokin) [Cleaved into: Myosin light chain kinase, smooth muscle, deglutamylated form]	90.6803	-1.19126	0.212521	2.07842e-08	2.55172e-06	OK
MYO10	Unconventional myosin-X (Unconventional myosin-10)	4232.94	0.290799	0.0825821	0.000429378	0.0144682	OK
MYO1B	Unconventional myosin-Ib (MYH-1c) (Myosin I alpha) (MMI-alpha) (MMIa)	11523.7	0.251253	0.0760087	0.000947804	0.0261754	OK
MYO1C	Unconventional myosin-Ic (Myosin I beta) (MMI-beta) (MMIb)	3800.8	0.272597	0.0897606	0.00238998	0.0522055	OK
N4BP1	Unconventional myosin-Ie (Myosin-Ic) (Unconventional myosin 1E)	1552.97	0.275134	0.0904393	0.00234857	0.0520971	OK
NAA10	NEDD4-binding protein 1 (N4BP1)	859.155	0.293709	0.0922749	0.00145768	0.0363687	OK
NAMPT	N-alpha-acetyltransferase 10 (EC 2.3.1.255) (N-terminal acetyltransferase complex ARD1 subunit homolog A) (hARD1) (NatA catalytic subunit Naa10)	3019.86	0.400025	0.114715	0.00048826	0.0158493	OK
NANOS1	Nicotinamide phosphoribosyltransferase (NAmPRTase) (Nampt) (EC 2.4.2.12) (Pre-B-cell colony-enhancing factor 1) (Pre-B cell-enhancing factor) (Visfatin)	33.9716	-1.09955	0.255289	1.65413e-05	0.000967508	OK
NCCRP1	Nanos homolog 1 (NOS-1) (EC_Rep1a)	592.716	0.535381	0.114995	3.22881e-06	0.000228784	OK
NCF2	Neutrophil cytosol factor 2 (NCF-2) (67 kDa neutrophil oxidase factor) (NADPH oxidase activator 2) (Neutrophil NADPH oxidase factor 2) (p67-phox)	426.72	0.478687	0.12203	8.75608e-05	0.00409718	OK
NCOA7	Nuclear receptor coactivator 7 (140 kDa estrogen receptor-associated protein) (Estrogen nuclear receptor coactivator 1)	556.598	0.340153	0.106606	0.00141911	0.0357663	OK
NDRG2	Protein NDRG2 (N-myc downstream-regulated gene 2 protein) (Protein Syld709613)	668.478	0.333906	0.103333	0.00123202	0.0319603	OK
NECAP2	Adaptin ear-binding coat-associated protein 2 (NECAP endocytosis-associated protein 2) (NECAP-2)	1074.56	0.313497	0.0907046	0.000547765	0.0173273	OK
NEDD9	Enhancer of filamentation 1 (hEF1) (CRK-associated substrate-related protein) (CAS-L) (CasL) (Cas scaffolding protein family member 2) (Neural precursor cell expressed developmentally down-regulated protein 9) (NEDD-9) (Renal carcinoma antigen NY-REN-12) (p105) [Cleaved into: Enhancer of filamentation 1 p55]	903.386	0.622153	0.0939022	3.45977e-11	5.95849e-09	OK
NEURL1B	E3 ubiquitin-protein ligase NEURL1B (EC 2.3.2.27) (Neuralized-2) (NEUR2) (Neuralized-like protein 1B) (Neuralized-like protein 3) (RING-type E3 ubiquitin transferase NEURL1B)	700.273	0.474552	0.0912191	1.968e-07	1.79436e-05	OK
NFIL3	Nuclear factor interleukin-3-regulated protein (E4 promoter-binding protein 4) (Interleukin-3 promoter transcriptional activator) (Interleukin-3-binding protein 1) (Transcriptional activator NF-IL3A)	533.942	-0.352615	0.113644	0.00191703	0.0444322	OK
NFKB1	Nuclear factor NF-kappa-B p105 subunit (DNA-binding factor KBF1) (EBP-1) (Nuclear factor of kappa light polypeptide gene enhancer in B-cells 1) [Cleaved into: Nuclear factor NF-kappa-B p50 subunit]	1053.58	0.49845	0.0830727	1.97114e-09	2.74631e-07	OK
NFKB2	Nuclear factor NF-kappa-B p100 subunit (DNA-binding factor KBF2) (H2TF1) (Lymphocyte translocation chromosome 10 protein) (Nuclear factor of kappa light polypeptide gene enhancer in B-cells 2) (Oncogene Lyt-10) (Lyt10) [Cleaved into: Nuclear factor NF-kappa-B p52 subunit]	1182.22	0.940857	0.0998113	4.24581e-21	1.38547e-18	OK
NFKBIA	NF-kappa-B inhibitor alpha (I-kappa-B-alpha) (IkB-alpha) (IkappaBalpha) (Major histocompatibility complex enhancer-binding protein MAD3)	2307.04	0.87022	0.0975917	4.79342e-19	1.35087e-16	OK
NFKBIE	NF-kappa-B inhibitor epsilon (NF-kappa-BIE) (I-kappa-B-epsilon) (IkB-E) (IkB-epsilon) (IkappaBepsilon)	144.992	0.490762	0.149273	0.00101015	0.027634	OK
NFKBIZ	NF-kappa-B inhibitor zeta (I-kappa-B-zeta) (IkB-zeta) (IkappaBzeta) (IL-1 inducible nuclear ankyrin-repeat protein) (INAP) (Molecule possessing ankyrin repeats induced by lipopolysaccharide) (MAIL)	1147.17	0.881612	0.101882	5.00608e-18	1.37945e-15	OK
NID1	Nidogen-1 (NID-1) (Entactin)	77.588	-1.01242	0.217875	3.37184e-06	0.000237561	OK
NLRP1	NACHT, LRR and PYD domains-containing protein 1 (Caspase recruitment domain-containing protein 7) (Death effector filament-forming ced-4-like apoptosis protein) (Nucleotide-binding domain and caspase recruitment domain)	1578.66	0.326244	0.0814114	6.14049e-05	0.00313342	OK
NMRK1	Nicotinamide riboside kinase 1 (NRK 1) (NmR-K 1) (EC 2.7.1.22) (Nicotinic acid riboside kinase 1) (EC 2.7.1.173) (Ribosylnicotinamide kinase 1) (RNK 1) (Ribosylnicotinic acid kinase 1)	272.349	-0.472276	0.134511	0.000446326	0.0148775	OK
NOP2	Probable 28S rRNA (cytosine(4447)-C(5))-methyltransferase (EC 2.1.1.-) (Nucleolar protein 1) (Nucleolar protein 2 homolog) (Proliferating-cell nucleolar antigen p120) (Proliferation-associated nucleolar protein p120)	966.1	0.300976	0.0818843	0.000237274	0.00908085	OK
NPNT	Nephronectin (Preosteoblast EGF-like repeat protein with MAM domain) (Protein EGFL6-like)	381.376	-0.482711	0.147765	0.0010879	0.0290107	OK
NR1D2	Nuclear receptor subfamily 1 group D member 2 (Orphan nuclear hormone receptor BD73) (Rev-erb alpha-related receptor) (RVR) (Rev-erb-beta) (V-erbA-related protein 1-related) (EAR-1R)	311.365	-0.501086	0.136024	0.000229769	0.00893144	OK
NR2F2	COUP transcription factor 2 (COUP-TF2) (Apolipoprotein A-I regulatory protein 1) (ARP-1) (COUP transcription factor II) (COUP-TF II) (Nuclear receptor subfamily 2 group F member 2)	2310.17	-0.401584	0.104895	0.00012895	0.00559085	OK
NRCAM	Neuronal cell adhesion molecule (Nr-CAM) (Neuronal surface protein Bravo) (hBravo) (NgCAM-related cell adhesion molecule) (Ng-CAM-related)	56.8439	0.810447	0.217053	0.000188564	0.00754257	OK
NRP1	Neuropilin-1 (Vascular endothelial cell growth factor 165 receptor) (CD antigen CD304)	1110.73	-0.362953	0.0917209	7.58507e-05	0.00365484	OK
NSFL1C	NSFL1 cofactor p47 (UBX domain-containing protein 2C) (p97 cofactor p47)	1632.04	0.224727	0.0706585	0.0014704	0.0365578	OK
NT5DC3	5'-nucleotidase domain-containing protein 3 (EC 3.1.3.-) (GRP94-neighboring nucleotidase)	429.878	-0.454016	0.116321	9.49594e-05	0.00437731	OK
OAS1	2'-5'-oligoadenylate synthase 1 ((2-5')oligo(A) synthase 1) (2-5A synthase 1) (EC 2.7.7.84) (E18/E16) (p46/p42 OAS)	197.543	1.5528	0.160943	5.00359e-22	1.67688e-19	OK
OAS2	2'-5'-oligoadenylate synthase 2 ((2-5')oligo(A) synthase 2) (2-5A synthase 2) (EC 2.7.7.84) (p69 OAS / p71 OAS) (p69OAS / p71OAS)	662.478	1.20834	0.122181	4.6132e-23	1.63439e-20	OK
OAS3	2'-5'-oligoadenylate synthase 3 ((2-5')oligo(A) synthase 3) (2-5A synthase 3) (EC 2.7.7.84) (p100 OAS) (p100OAS)	976.391	1.24371	0.133152	9.58393e-21	2.89855e-18	OK
OGDH	2-oxoglutarate dehydrogenase, mitochondrial (EC 1.2.4.2) (2-oxoglutarate dehydrogenase complex component E1) (OGDC-E1) (Alpha-ketoglutarate dehydrogenase)	3147	0.272753	0.0801261	0.000663955	0.0200728	OK
OLFML2A	Olfactomedin-like protein 2A (Photomedin-1)	413.256	-0.910278	0.121111	5.64579e-14	1.3463e-11	OK
OSBP2	Oxysterol-binding protein 2 (Oxysterol-binding protein-related protein 4) (ORP-4) (OSBP-related protein 4)	123.996	0.603296	0.163412	0.000222603	0.00870749	OK
OSMR	Oncostatin-M-specific receptor subunit beta (Interleukin-31 receptor subunit beta) (IL-31 receptor subunit beta) (IL-31R subunit beta) (IL-31R-beta) (IL-31RB)	2080.62	0.276422	0.0874303	0.00156888	0.0382778	OK
OTUB2	Ubiquitin thioesterase OTUB2 (EC 3.4.19.12) (Deubiquitinating enzyme OTUB2) (OTU domain-containing ubiquitin aldehyde-binding protein 2) (Otubain-2) (Ubiquitin-specific-processing protease OTUB2)	522.866	0.599056	0.122127	9.3344e-07	7.32573e-05	OK
P2RY6	P2Y purinoceptor 6 (P2Y6)	44.5518	0.883093	0.240114	0.000235256	0.00903859	OK
PA2G4	Proliferation-associated protein 2G4 (Cell cycle protein p38-2G4 homolog) (hG4-1) (ErbB3-binding protein 1)	4498.94	0.218833	0.0678685	0.00126251	0.0326148	OK
PADI3	Protein-arginine deiminase type-3 (EC 3.5.3.15) (Peptidylarginine deiminase III) (Protein-arginine deiminase type III)	433.509	-0.601508	0.135167	8.58219e-06	0.000540199	OK
PAF1	RNA polymerase II-associated factor 1 homolog (hPAF1) (Pancreatic differentiation protein 2)	1816.94	0.249829	0.0827852	0.00254618	0.0542485	OK
PALMD	Palmdelphin (Paralemmin-like protein)	284.83	-0.479036	0.139713	0.000606426	0.0188463	OK
PARD6G	Partitioning defective 6 homolog gamma (PAR-6 gamma) (PAR6D)	313.282	-0.344168	0.108065	0.00144847	0.0363583	OK
PARP12	Protein mono-ADP-ribosyltransferase PARP12 (EC 2.4.2.-) (ADP-ribosyltransferase diphtheria toxin-like 12) (ARTD12) (Poly [ADP-ribose] polymerase 12) (PARP-12) (Zinc finger CCCH domain-containing protein 1)	353.583	0.751927	0.113304	3.21481e-11	5.8623e-09	OK
PARP14	Protein mono-ADP-ribosyltransferase PARP14 (EC 2.4.2.-) (ADP-ribosyltransferase diphtheria toxin-like 8) (ARTD8) (B aggressive lymphoma protein 2) (Poly [ADP-ribose] polymerase 14) (PARP-14)	1054.1	0.306388	0.0848182	0.000303498	0.0111342	OK
PARP9	Protein mono-ADP-ribosyltransferase PARP9 (EC 2.4.2.-) (ADP-ribosyltransferase diphtheria toxin-like 9) (ARTD9) (B aggressive lymphoma protein) (Poly [ADP-ribose] polymerase 9) (PARP-9)	863.553	0.648008	0.0998275	8.51138e-11	1.35309e-08	OK
PBX1	Pre-B-cell leukemia transcription factor 1 (Homeobox protein PBX1) (Homeobox protein PRL)	333.41	-0.628763	0.114372	3.85164e-08	4.34185e-06	OK
PCDH7	Protocadherin-7 (Brain-heart protocadherin) (BH-Pcdh)	473.369	-0.596225	0.112419	1.13552e-07	1.15414e-05	OK
PCSK9	Proprotein convertase subtilisin/kexin type 9 (EC 3.4.21.-) (Neural apoptosis-regulated convertase 1) (NARC-1) (Proprotein convertase 9) (PC9) (Subtilisin/kexin-like protease PC9)	438.447	0.355273	0.115233	0.00204868	0.0470438	OK
PCYOX1	Prenylcysteine oxidase 1 (EC 1.8.3.5) (Prenylcysteine lyase)	1925.49	-0.271322	0.0900798	0.00259519	0.0548217	OK
PDCD4	Programmed cell death protein 4 (Neoplastic transformation inhibitor protein) (Nuclear antigen H731-like) (Protein 197/15a)	4541.11	-0.38947	0.0863496	6.47081e-06	0.000426798	OK
PDE5A	cGMP-specific 3',5'-cyclic phosphodiesterase (EC 3.1.4.35) (cGMP-binding cGMP-specific phosphodiesterase) (CGB-PDE)	117.805	-0.580809	0.187059	0.00190317	0.0443596	OK
PDGFB	Platelet-derived growth factor subunit B (PDGF subunit B) (PDGF-2) (Platelet-derived growth factor B chain) (Platelet-derived growth factor beta polypeptide) (Proto-oncogene c-Sis) (Becaplermin)	226.145	0.95219	0.141371	1.63496e-11	3.07175e-09	OK
PDIA5	Protein disulfide-isomerase A5 (EC 5.3.4.1) (Protein disulfide isomerase-related protein)	465.067	0.341137	0.0969231	0.00043209	0.0145201	OK
PDK4	[Pyruvate dehydrogenase (acetyl-transferring)] kinase isozyme 4, mitochondrial (EC 2.7.11.2) (Pyruvate dehydrogenase kinase isoform 4)	28.6513	-0.855396	0.279305	0.00219428	0.0492917	OK
PDPN	Podoplanin (Aggrus) (Glycoprotein 36) (Gp36) (PA2.26 antigen) (T1-alpha) (T1A) [Cleaved into: 29kDa cytosolic podoplanin intracellular domain (PICD)]	1393.94	0.306253	0.0765389	6.30043e-05	0.00318879	OK
PDZK1IP1	PDZK1-interacting protein 1 (17 kDa membrane-associated protein) (Protein DD96)	133.049	2.06568	0.202376	1.84221e-24	7.36883e-22	OK
PER3	Period circadian protein homolog 3 (hPER3) (Cell growth-inhibiting gene 13 protein) (Circadian clock protein PERIOD 3)	138.588	-0.468009	0.154651	0.00247624	0.0532156	OK
PGLYRP4	Peptidoglycan recognition protein 4 (Peptidoglycan recognition protein I-beta) (PGLYRPIbeta) (PGRP-I-beta) (Peptidoglycan recognition protein intermediate beta)	104.22	1.81085	0.17904	4.77666e-24	1.79487e-21	OK
PGRMC2	Membrane-associated progesterone receptor component 2 (Progesterone membrane-binding protein) (Steroid receptor protein DG6)	914.801	-0.364191	0.104268	0.000477904	0.0156359	OK
PHTF2	Putative homeodomain transcription factor 2	165.493	-0.537346	0.170621	0.0016363	0.0394749	OK
PI3	Elafin (Elastase-specific inhibitor) (ESI) (Peptidase inhibitor 3) (PI-3) (Protease inhibitor WAP3) (Skin-derived antileukoproteinase) (SKALP) (WAP four-disulfide core domain protein 14)	71.2253	1.45136	0.226118	1.37531e-10	2.15871e-08	OK
PIK3R3	Phosphatidylinositol 3-kinase regulatory subunit gamma (PI3-kinase regulatory subunit gamma) (PI3K regulatory subunit gamma) (PtdIns-3-kinase regulatory subunit gamma) (Phosphatidylinositol 3-kinase 55 kDa regulatory subunit gamma) (PI3-kinase subunit p55-gamma) (PtdIns-3-kinase regulatory subunit p55-gamma) (p55PIK)	555.623	-0.373767	0.122773	0.00233155	0.0518524	OK
PKM	Pyruvate kinase PKM (EC 2.7.1.40) (Cytosolic thyroid hormone-binding protein) (CTHBP) (Opa-interacting protein 3) (OIP-3) (Pyruvate kinase 2/3) (Pyruvate kinase muscle isozyme) (Thyroid hormone-binding protein 1) (THBP1) (Tumor M2-PK) (p58)	69278.7	0.196323	0.0641282	0.00220297	0.0493976	OK
PLAT	Tissue-type plasminogen activator (t-PA) (t-plasminogen activator) (tPA) (EC 3.4.21.68) (Alteplase) (Reteplase) [Cleaved into: Tissue-type plasminogen activator chain A; Tissue-type plasminogen activator chain B]	444.158	1.32342	0.128805	9.17319e-25	3.92233e-22	OK
PLAU	Urokinase-type plasminogen activator (U-plasminogen activator) (uPA) (EC 3.4.21.73) [Cleaved into: Urokinase-type plasminogen activator long chain A; Urokinase-type plasminogen activator short chain A; Urokinase-type plasminogen activator chain B]	10480.2	0.53818	0.0795567	1.33558e-11	2.54787e-09	OK
PLAUR	Urokinase plasminogen activator surface receptor (U-PAR) (uPAR) (Monocyte activation antigen Mo3) (CD antigen CD87)	614.513	0.65339	0.119239	4.26149e-08	4.7384e-06	OK
PLEK2	Pleckstrin-2	1204.87	0.329853	0.0985906	0.000820794	0.0237139	OK
PLEKHA5	Pleckstrin homology domain-containing family A member 5 (PH domain-containing family A member 5) (Phosphoinositol 3-phosphate-binding protein 2) (PEPP-2)	1006.43	-0.32123	0.106594	0.00258183	0.0546326	OK
PLK3	Serine/threonine-protein kinase PLK3 (EC 2.7.11.21) (Cytokine-inducible serine/threonine-protein kinase) (FGF-inducible kinase) (Polo-like kinase 3) (PLK-3) (Proliferation-related kinase)	426.657	0.395041	0.12408	0.0014537	0.0363687	OK
PLSCR1	Phospholipid scramblase 1 (PL scramblase 1) (Ca(2+)-dependent phospholipid scramblase 1) (Erythrocyte phospholipid scramblase) (MmTRA1b)	440.481	0.806604	0.126155	1.61891e-10	2.47833e-08	OK
PML	Protein PML (Promyelocytic leukemia protein) (RING finger protein 71) (Tripartite motif-containing protein 19)	1099.2	0.420714	0.126648	0.000894037	0.0251956	OK
PNP	Purine nucleoside phosphorylase (PNP) (EC 2.4.2.1) (Inosine phosphorylase) (Inosine-guanosine phosphorylase)	1835.91	0.270116	0.0881966	0.00219384	0.0492917	OK
POLR3E	NA	393.351	0.355541	0.114571	0.00191417	0.0444322	OK
POU2F2	POU domain, class 2, transcription factor 2 (Lymphoid-restricted immunoglobulin octamer-binding protein NF-A2) (Octamer-binding protein 2) (Oct-2) (Octamer-binding transcription factor 2) (OTF-2)	162.603	0.671671	0.150611	8.21025e-06	0.000519424	OK
PPARGC1A	Peroxisome proliferator-activated receptor gamma coactivator 1-alpha (PGC-1-alpha) (PPAR-gamma coactivator 1-alpha) (PPARGC-1-alpha) (Ligand effect modulator 6)	76.4114	-0.912489	0.188171	1.2392e-06	9.36958e-05	OK
PPDPF	Pancreatic progenitor cell differentiation and proliferation factor (Exocrine differentiation and proliferation factor)	1851.16	-0.425529	0.124049	0.000602844	0.0187821	OK
PPIF	Peptidyl-prolyl cis-trans isomerase F, mitochondrial (PPIase F) (EC 5.2.1.8) (Cyclophilin D) (CyP-D) (CypD) (Cyclophilin F) (Mitochondrial cyclophilin) (CyP-M) (Rotamase F)	625.113	0.333909	0.0990272	0.00074653	0.0222387	OK
PPP1R15A	Protein phosphatase 1 regulatory subunit 15A (Growth arrest and DNA damage-inducible protein GADD34) (Myeloid differentiation primary response protein MyD116 homolog)	2295.64	0.368793	0.0898889	4.08239e-05	0.00221055	OK
PPP2R1A	Serine/threonine-protein phosphatase 2A 65 kDa regulatory subunit A alpha isoform (Medium tumor antigen-associated 61 kDa protein) (PP2A subunit A isoform PR65-alpha) (PP2A subunit A isoform R1-alpha)	2192.23	0.269535	0.0888644	0.00242048	0.0525639	OK
PRCP	Lysosomal Pro-X carboxypeptidase (EC 3.4.16.2) (Angiotensinase C) (Lysosomal carboxypeptidase C) (Proline carboxypeptidase) (Prolylcarboxypeptidase) (PRCP)	712.636	-0.339948	0.106328	0.00138783	0.0351071	OK
PRDM1	PR domain zinc finger protein 1 (EC 2.1.1.-) (BLIMP-1) (Beta-interferon gene positive regulatory domain I-binding factor) (PR domain-containing protein 1) (Positive regulatory domain I-binding factor 1) (PRDI-BF1) (PRDI-binding factor 1)	239.948	0.671508	0.128205	1.6255e-07	1.55048e-05	OK
PRELID1	PRELI domain-containing protein 1, mitochondrial (25 kDa protein of relevant evolutionary and lymphoid interest) (Px19-like protein)	1880.55	0.433939	0.120921	0.000332446	0.012018	OK
PRELID2	PRELI domain-containing protein 2	116.148	0.574865	0.175491	0.00105379	0.0284683	OK
PRKACB	cAMP-dependent protein kinase catalytic subunit beta (PKA C-beta) (EC 2.7.11.11)	150.294	-0.57246	0.153368	0.000189514	0.00755619	OK
PRODH	Proline dehydrogenase 1, mitochondrial (EC 1.5.5.2) (Proline oxidase) (Proline oxidase 2) (p53-induced gene 6 protein)	28.9678	-0.833583	0.275785	0.00250626	0.0536747	OK
PROS1	Vitamin K-dependent protein S	330.669	-0.629861	0.118705	1.11981e-07	1.14757e-05	OK
PRSS23	Serine protease 23 (EC 3.4.21.-) (Putative secreted protein Zsig13)	4901.51	-0.443523	0.0829701	9.01316e-08	9.47146e-06	OK
PRSS3	Trypsin-3 (EC 3.4.21.4) (Brain trypsinogen) (Mesotrypsin) (Mesotrypsinogen) (Serine protease 3) (Serine protease 4) (Trypsin III) (Trypsin IV)	114.395	0.64749	0.184099	0.000436345	0.0146235	OK
PSMB8	Proteasome subunit beta type-8 (EC 3.4.25.1) (Low molecular mass protein 7) (Macropain subunit C13) (Multicatalytic endopeptidase complex subunit C13) (Proteasome component C13) (Proteasome subunit beta-5i) (Really interesting new gene 10 protein)	221.976	0.481077	0.134796	0.000358459	0.0127361	OK
PSMB9	Proteasome subunit beta type-9 (EC 3.4.25.1) (Low molecular mass protein 2) (Macropain chain 7) (Multicatalytic endopeptidase complex chain 7) (Proteasome chain 7) (Proteasome subunit beta-1i) (Really interesting new gene 12 protein)	70.7159	0.754252	0.250176	0.00257083	0.0544927	OK
PSMC3	26S proteasome regulatory subunit 6A (26S proteasome AAA-ATPase subunit RPT5) (Proteasome 26S subunit ATPase 3) (Proteasome subunit P50) (Tat-binding protein 1) (TBP-1)	1099.47	0.27661	0.0887176	0.00182165	0.0429438	OK
PSME2	Proteasome activator complex subunit 2 (11S regulator complex subunit beta) (REG-beta) (Activator of multicatalytic protease subunit 2) (Proteasome activator 28 subunit beta) (PA28b) (PA28beta)	1018.56	0.379977	0.111614	0.000663124	0.0200728	OK
PSTPIP2	Proline-serine-threonine phosphatase-interacting protein 2 (PEST phosphatase-interacting protein 2)	710.297	0.296324	0.0896046	0.000942971	0.0261001	OK
PTAFR	Platelet-activating factor receptor (PAF-R) (PAFr)	1840.22	0.398471	0.0783281	3.63375e-07	3.10748e-05	OK
PTGS2	Prostaglandin G/H synthase 2 (EC 1.14.99.1) (Cyclooxygenase-2) (COX-2) (PHS II) (Prostaglandin H2 synthase 2) (PGH synthase 2) (PGHS-2) (Prostaglandin-endoperoxide synthase 2)	401.161	0.511871	0.130459	8.72284e-05	0.00409709	OK
PTPRZ1	Receptor-type tyrosine-protein phosphatase zeta (R-PTP-zeta) (EC 3.1.3.48) (Protein-tyrosine phosphatase receptor type Z polypeptide 1) (Protein-tyrosine phosphatase receptor type Z polypeptide 2) (R-PTP-zeta-2)	139.978	-0.649461	0.150591	1.61247e-05	0.000947612	OK
PUM2	Pumilio homolog 2 (Pumilio-2)	1163.89	-0.285151	0.0909422	0.0017155	0.0409426	OK
PWP2	Periodic tryptophan protein 2 homolog	521.547	0.341786	0.104018	0.00101682	0.0277111	OK
PXDN	Peroxidasin homolog (EC 1.11.1.7) (Melanoma-associated antigen MG50) (Vascular peroxidase 1) (p53-responsive gene 2 protein)	5063.02	0.25727	0.078584	0.00106103	0.0286017	OK
RAB11FIP1	Rab11 family-interacting protein 1 (Rab11-FIP1) (Rab-coupling protein)	2624.23	0.354144	0.0926694	0.000132596	0.00568922	OK
RAB15	Ras-related protein Rab-15	175.544	-0.678713	0.142675	1.96424e-06	0.000143274	OK
RAB30	Ras-related protein Rab-30	127.939	-0.64622	0.165268	9.22435e-05	0.00426798	OK
RANGAP1	Ran GTPase-activating protein 1 (RanGAP1)	1782.67	0.392528	0.113457	0.000540785	0.0171663	OK
RBM20	RNA-binding protein 20 (RNA-binding motif protein 20)	21.2826	-1.00073	0.275652	0.000282974	0.010633	OK
RELB	Transcription factor RelB (I-Rel)	124.431	0.76097	0.20028	0.000144969	0.00607301	OK
RFTN1	Raftlin (Cell migration-inducing gene 2 protein) (Raft-linking protein)	462.759	0.465697	0.105467	1.00744e-05	0.000621508	OK
RHCG	Ammonium transporter Rh type C (Rh glycoprotein kidney) (Rhesus blood group family type C glycoprotein) (Rh family type C glycoprotein) (Rh type C glycoprotein) (Tumor-related protein DRC2)	1094.76	1.29883	0.110564	7.28968e-32	4.10873e-29	OK
RHOC	Rho-related GTP-binding protein RhoC (Rho cDNA clone 9) (h9)	5440.7	0.25457	0.0790584	0.00128178	0.0329171	OK
RHOF	Rho-related GTP-binding protein RhoF (Rho family GTPase Rif) (Rho in filopodia)	432.732	0.728821	0.144369	4.4571e-07	3.73433e-05	OK
RHOV	Rho-related GTP-binding protein RhoV (CDC42-like GTPase 2) (GTP-binding protein-like 2) (Rho GTPase-like protein ARHV) (Wnt-1 responsive Cdc42 homolog 2) (WRCH-2)	518.952	0.652789	0.0989279	4.14961e-11	6.95341e-09	OK
RND1	Rho-related GTP-binding protein Rho6 (Rho family GTPase 1) (Rnd1)	55.3823	1.2072	0.230544	1.6383e-07	1.55076e-05	OK
RNF128	E3 ubiquitin-protein ligase RNF128 (EC 2.3.2.27) (Gene related to anergy in lymphocytes protein) (GRAIL) (RING finger protein 128) (RING-type E3 ubiquitin transferase RNF128)	266.293	-0.421173	0.116331	0.000294055	0.0108634	OK
RPL17	60S ribosomal protein L17 (60S ribosomal protein L23) (Large ribosomal subunit protein uL22) (PD-1)	419.687	-0.372171	0.117935	0.00160104	0.0389272	OK
RPL9	60S ribosomal protein L9 (Large ribosomal subunit protein uL6)	12588	-0.41617	0.0964496	1.59677e-05	0.000945844	OK
RRP1	Ribosomal RNA processing protein 1 homolog A (Novel nuclear protein 1) (NNP-1) (Nucleolar protein Nop52) (RRP1-like protein)	341.082	0.380442	0.110876	0.000600849	0.0187671	OK
S100A12	Protein S100-A12 (CGRP) (Calcium-binding protein in amniotic fluid 1) (CAAF1) (Calgranulin-C) (CAGC) (Extracellular newly identified RAGE-binding protein) (EN-RAGE) (Migration inhibitory factor-related protein 6) (MRP-6) (p6) (Neutrophil S100 protein) (S100 calcium-binding protein A12) [Cleaved into: Calcitermin]	53.0447	0.959368	0.237504	5.35939e-05	0.00281595	OK
S100A7	Protein S100-A7 (Psoriasin) (S100 calcium-binding protein A7)	10.7321	1.48753	0.285907	1.96263e-07	1.79436e-05	OK
S100A8	Protein S100-A8 (Calgranulin-A) (Calprotectin L1L subunit) (Cystic fibrosis antigen) (CFAG) (Leukocyte L1 complex light chain) (Migration inhibitory factor-related protein 8) (MRP-8) (p8) (S100 calcium-binding protein A8) (Urinary stone protein band A)	1707.56	1.7791	0.12392	9.6412e-47	1.32834e-43	OK
S100A9	Protein S100-A9 (Calgranulin-B) (Calprotectin L1H subunit) (Leukocyte L1 complex heavy chain) (Migration inhibitory factor-related protein 14) (MRP-14) (p14) (S100 calcium-binding protein A9)	12315.2	1.08721	0.0805921	1.78342e-41	1.38215e-38	OK
S100P	Protein S100-P (Migration-inducing gene 9 protein) (MIG9) (Protein S100-E) (S100 calcium-binding protein P)	685.766	0.678904	0.0867842	5.16197e-15	1.28017e-12	OK
SAA2	Serum amyloid A-2 protein (SAA2)	576.024	2.33353	0.107629	3.09164e-104	1.91682e-100	OK
SAMD4A	Protein Smaug homolog 1 (Smaug 1) (hSmaug1) (Sterile alpha motif domain-containing protein 4A) (SAM domain-containing protein 4A)	721.078	0.48181	0.0930885	2.26907e-07	2.03888e-05	OK
SAMD9L	Sterile alpha motif domain-containing protein 9-like (SAM domain-containing protein 9-like)	239.186	0.555512	0.173646	0.0013785	0.0349557	OK
SAMHD1	Deoxynucleoside triphosphate triphosphohydrolase SAMHD1 (dNTPase) (EC 3.1.5.-) (Dendritic cell-derived IFNG-induced protein) (DCIP) (Monocyte protein 5) (MOP-5) (SAM domain and HD domain-containing protein 1) (hSAMHD1)	198.963	0.73114	0.160246	5.05204e-06	0.000336803	OK
SAT1	Diamine acetyltransferase 1 (EC 2.3.1.57) (Polyamine N-acetyltransferase 1) (Putrescine acetyltransferase) (Spermidine/spermine N(1)-acetyltransferase 1) (SSAT) (SSAT-1)	16712.7	0.293698	0.0742311	7.60443e-05	0.00365484	OK
SBNO2	Protein strawberry notch homolog 2	645.513	0.513937	0.152551	0.00075457	0.0222778	OK
SCP2	NA	2048.35	-0.362635	0.109194	0.000896932	0.0252199	OK
SDC4	Syndecan-4 (SYND4) (Amphiglycan) (Ryudocan core protein)	6317.12	0.349082	0.0973699	0.000336935	0.0120894	OK
SEMA3E	Carboxy-terminal domain RNA polymerase II polypeptide A small phosphatase 2 (EC 3.1.3.16) (Nuclear LIM interactor-interacting factor 2) (NLI-interacting factor 2) (Protein OS-4) (Small C-terminal domain phosphatase 2) (Small CTD phosphatase 2) (SCP2)	70.0823	-0.665168	0.207757	0.00136637	0.0347191	OK
SEMA4B	Semaphorin-4B (Semaphorin-C)	3633.21	0.360193	0.118611	0.00239135	0.0522055	OK
SEMA6A	Semaphorin-6A (Semaphorin VIA) (Sema VIA) (Semaphorin-6A-1) (SEMA6A-1)	186.449	0.407465	0.13546	0.00262972	0.0552687	OK
SEMA7A	Semaphorin-7A (CDw108) (JMH blood group antigen) (John-Milton-Hargen human blood group Ag) (Semaphorin-K1) (Sema K1) (Semaphorin-L) (Sema L) (CD antigen CD108)	632.051	0.478453	0.125366	0.000135388	0.00574937	OK
SEPP1	Selenoprotein P (SeP)	213.442	-0.826208	0.157828	1.65117e-07	1.5511e-05	OK
SERPINB1	Serine protease inhibitor EIA	1810.39	0.71095	0.0977075	3.43071e-13	7.73468e-11	OK
SERPINB4	Squamous cell carcinoma antigen 2, SCCA-2	42.2782	0.814345	0.267232	0.00230883	0.0514918	OK
SERPINB8	Serpin B8 (Cytoplasmic antiproteinase 2) (CAP-2) (CAP2) (Peptidase inhibitor 8) (PI-8)	608.403	0.387975	0.0968055	6.12915e-05	0.00313342	OK
SFRP1	Secreted frizzled-related protein 1 (FRP-1) (sFRP-1) (Secreted apoptosis-related protein 2) (SARP-2)	932.235	-0.301634	0.0995863	0.00245473	0.0529367	OK
SGPP2	Sphingosine-1-phosphate phosphatase 2 (SPPase2) (Spp2) (hSPP2) (EC 3.1.3.-) (Sphingosine-1-phosphatase 2)	94.9114	0.720845	0.180548	6.53723e-05	0.00328185	OK
SH3KBP1	Serpin B4 (Leupin) (Peptidase inhibitor 11) (PI-11) (Squamous cell carcinoma antigen 2) (SCCA-2)	1559.84	0.356722	0.097657	0.000259397	0.00983647	OK
SH3PXD2B	SH3 and PX domain-containing protein 2B	2177.41	0.297588	0.0736428	5.32313e-05	0.0028088	OK
SH3RF2	E3 ubiquitin-protein ligase SH3RF2 (EC 2.3.2.27) (Heart protein phosphatase 1-binding protein) (HEPP1) (POSH-eliminating RING protein) (Protein phosphatase 1 regulatory subunit 39) (RING finger protein 158) (RING-type E3 ubiquitin transferase SH3RF2) (SH3 domain-containing RING finger protein 2)	702.189	0.427058	0.0871415	9.54752e-07	7.39932e-05	OK
SHB	SH2 domain-containing adapter protein B	596.328	0.350097	0.101181	0.000539996	0.0171663	OK
SHMT2	Serine hydroxymethyltransferase, mitochondrial (SHMT) (EC 2.1.2.1) (Glycine hydroxymethyltransferase) (Serine methylase)	1371.27	0.257818	0.0863246	0.00282093	0.0581055	OK
SIPA1L1	Signal-induced proliferation-associated 1-like protein 1 (SIPA1-like protein 1) (High-risk human papilloma viruses E6 oncoproteins targeted protein 1) (E6-targeted protein 1)	2335.72	0.274583	0.0814716	0.000750874	0.0222747	OK
SLAMF7	SLAM family member 7 (CD2 subset 1) (CD2-like receptor-activating cytotoxic cells) (CRACC) (Membrane protein FOAP-12) (Novel Ly9) (Protein 19A) (CD antigen CD319)	269.556	-0.529282	0.14841	0.000361983	0.0128246	OK
SLAMF9	SLAM family member 9 (CD2 family member 10) (CD2F-10) (CD84 homolog 1) (CD84-H1)	166.927	0.567574	0.15793	0.00032584	0.0118836	OK
SLC11A2	Solute carrier family 15 member 2 (Kidney H(+)/peptide cotransporter) (Oligopeptide transporter, kidney isoform) (Peptide transporter 2)	691.104	0.417878	0.105581	7.56171e-05	0.00365484	OK
SLC15A2	Solute carrier family 15 member 2	217.9	-0.388032	0.128006	0.00243463	0.0527788	OK
SLC25A28	Solute carrier family 25 member 28	463.608	0.400032	0.101421	8.00414e-05	0.00380273	OK
SLC25A37	Solute carrier family 25 member 37	428.238	0.603866	0.10939	3.38433e-08	3.92202e-06	OK
SLC26A2	Sulfate transporter	358.221	-0.460552	0.115403	6.58447e-05	0.00329224	OK
SLC35D1	UDP-glucuronic acid/UDP-N-acetylgalactosamine transporter (UDP-GlcA/UDP-GalNAc transporter) (Solute carrier family 35 member D1) (UDP-galactose transporter-related protein 7) (UGTrel7)	511.648	-0.380822	0.126064	0.00252065	0.0538898	OK
SLC43A3	Solute carrier family 43 member 3 (Protein FOAP-13)	359.599	0.473524	0.110531	1.83481e-05	0.00106815	OK
SLC6A14	Sodium- and chloride-dependent neutral and basic amino acid transporter B(0+) (Amino acid transporter ATB0+) (Solute carrier family 6 member 14)	1660.17	1.17938	0.103253	3.23857e-30	1.67326e-27	OK
SLC7A1	High affinity cationic amino acid transporter 1 (CAT-1) (CAT1) (Ecotropic retroviral leukemia receptor homolog) (Ecotropic retrovirus receptor homolog) (Solute carrier family 7 member 1) (System Y+ basic amino acid transporter)	1473.4	0.227931	0.075904	0.00267434	0.0559221	OK
SLC7A8	Large neutral amino acids transporter small subunit 2	394.757	-0.401413	0.128926	0.00184868	0.0434161	OK
SLFN5	Schlafen family member 5	1933.09	0.271211	0.0705599	0.000121191	0.00540564	OK
SLITRK6	SLIT and NTRK-like protein 6	720.188	-0.575979	0.11655	7.73694e-07	6.18956e-05	OK
SLK	STE20-like serine	3048.63	-0.275094	0.0918351	0.00273976	0.0568111	OK
SLPI	Antileukoproteinase (ALP) (BLPI) (HUSI-1) (Mucus proteinase inhibitor) (MPI) (Protease inhibitor WAP4) (Secretory leukocyte protease inhibitor) (Seminal proteinase inhibitor) (WAP four-disulfide core domain protein 4)	1668.26	0.56842	0.0901182	2.83593e-10	4.28848e-08	OK
SMAD3	Mothers against decapentaplegic homolog 3 (MAD homolog 3) (Mad3) (Mothers against DPP homolog 3) (hMAD-3) (JV15-2) (SMAD family member 3) (SMAD 3) (Smad3) (hSMAD3)	3876.61	0.351967	0.0792336	8.90676e-06	0.000557797	OK
SMAD5	Mothers against decapentaplegic homolog 5 (MAD homolog 5) (Mothers against DPP homolog 5) (JV5-1) (SMAD family member 5) (SMAD 5) (Smad5) (hSmad5)	1255.55	-0.285573	0.0802976	0.00037592	0.0132051	OK
SMEK2	Serine/threonine-protein phosphatase 4 regulatory subunit 3B (SMEK homolog 2)	904.931	-0.456771	0.137403	0.000886369	0.0250364	OK
SNHG8	NA	769.329	-0.332471	0.0911871	0.000266322	0.0100683	OK
SOCS3	Suppressor of cytokine signaling 3 (SOCS-3) (Cytokine-inducible SH2 protein 3) (CIS-3) (STAT-induced STAT inhibitor 3) (SSI-3)	189.944	0.953118	0.157826	1.55046e-09	2.18473e-07	OK
SOD2	Superoxide dismutase [Mn], mitochondrial (EC 1.15.1.1)	2001.88	1.45256	0.119385	4.65904e-34	2.75105e-31	OK
SORL1	Sortilin-related receptor (Low-density lipoprotein receptor relative with 11 ligand-binding repeats) (LDLR relative with 11 ligand-binding repeats) (LR11) (SorLA-1) (Sorting protein-related receptor containing LDLR class A repeats) (SorLA)	537.022	-0.335421	0.108781	0.00204623	0.0470438	OK
SOX6	Transcription factor SOX-6	81.0937	-0.775224	0.197441	8.62419e-05	0.00406616	OK
SP100	Nuclear autoantigen Sp-100 (Nuclear dot-associated Sp100 protein) (Speckled 100 kDa)	1302.46	0.232595	0.074827	0.00188083	0.0440875	OK
SPARC	SPARC (Basement-membrane protein 40) (BM-40) (Osteonectin) (ON) (Secreted protein acidic and rich in cysteine)	1084.05	-0.400446	0.0970978	3.72106e-05	0.00204756	OK
SPRR1A	Cornifin-A (19 kDa pancornulin) (SPRK) (Small proline-rich protein IA) (SPR-IA)	225.347	0.682892	0.15785	1.51694e-05	0.000908701	OK
SPRR2A	Small proline-rich protein 2A (SPR-2A) (2-1)	506.664	1.55832	0.153045	2.38424e-24	9.23894e-22	OK
SPRR2D	Small proline-rich protein 2D (SPR-2D) (Small proline-rich protein II) (SPR-II)	365.376	2.60728	0.188444	1.54908e-43	1.74623e-40	OK
SPRR2E	Small proline-rich protein 2E (SPR-2E) (Small proline-rich protein II) (SPR-II)	47.1477	2.43674	0.25966	6.3304e-21	1.96243e-18	OK
SPRY4	Protein sprouty homolog 4 (Spry-4)	221.021	0.581069	0.175315	0.000918298	0.0257041	OK
SPTLC3	Serine palmitoyltransferase 3 (EC 2.3.1.50) (Long chain base biosynthesis protein 2b) (LCB2b) (Long chain base biosynthesis protein 3) (LCB 3) (Serine-palmitoyl-CoA transferase 3) (SPT 3)	199.983	-0.582688	0.136483	1.96067e-05	0.00113609	OK
SQLE	Squalene monooxygenase (EC 1.14.14.17) (Squalene epoxidase) (SE)	1890.32	0.322455	0.101303	0.00145717	0.0363687	OK
SQRDL	Sulfide:quinone oxidoreductase, mitochondrial (SQOR) (EC 1.8.5.-) (Sulfide dehydrogenase-like) (Sulfide quinone oxidoreductase)	2038.05	0.421936	0.11749	0.00032909	0.0119669	OK
SRGAP3	SLIT-ROBO Rho GTPase-activating protein 3 (srGAP3) (Mental disorder-associated GAP) (Rho GTPase-activating protein 14) (WAVE-associated Rac GTPase-activating protein) (WRP)	531.986	-0.314292	0.099278	0.00154671	0.0381296	OK
SRM	Spermidine synthase (SPDSY) (EC 2.5.1.16) (Putrescine aminopropyltransferase)	445.864	0.378659	0.117587	0.00128079	0.0329171	OK
SRSF9	Serine/arginine-rich splicing factor 9 (Pre-mRNA-splicing factor SRp30C) (Splicing factor, arginine/serine-rich 9)	1358.24	0.256246	0.0851022	0.00260359	0.0549057	OK
STAP2	Signal-transducing adaptor protein 2 (STAP-2) (Breast tumor kinase substrate) (BRK substrate)	478.239	0.411163	0.1057	0.000100276	0.0045714	OK
STARD5	StAR-related lipid transfer protein 5 (START domain-containing protein 5) (StARD5)	228.554	0.461989	0.126064	0.000247602	0.00944698	OK
STAT1	Signal transducer and activator of transcription 1-alpha/beta (Transcription factor ISGF-3 components p91/p84)	1739.98	0.511995	0.0895993	1.10171e-08	1.40838e-06	OK
STAT2	Signal transducer and activator of transcription 2 (p113)	1842.19	0.27316	0.0843089	0.00119534	0.0312705	OK
STAT5A	Signal transducer and activator of transcription 5A	62.556	0.909647	0.224023	4.89652e-05	0.00260588	OK
STC1	Stanniocalcin-1 (STC-1)	712.01	0.711131	0.113881	4.25068e-10	6.27481e-08	OK
STK10	Serine/threonine-protein kinase 10 (EC 2.7.11.1) (Lymphocyte-oriented kinase)	1174.62	0.30656	0.100878	0.0023742	0.0521499	OK
STK25	Serine/threonine-protein kinase 25 (EC 2.7.11.1) (Ste20-like kinase) (Sterile 20/oxidant stress-response kinase 1) (SOK-1) (Ste20/oxidant stress response kinase 1)	1210.03	0.429429	0.122533	0.000457298	0.0151213	OK
STON1	Stonin-1 (Stoned B-like factor)	30.6102	-1.10081	0.253685	1.42946e-05	0.000860452	OK
STRBP	Spermatid perinuclear RNA-binding protein	380.216	-0.372256	0.107804	0.000554209	0.0174865	OK
SULF2	Extracellular sulfatase Sulf-2 (hSulf-2) (EC 3.1.6.-)	3378.78	-0.281561	0.0857107	0.00101976	0.0277303	OK
SYTL5	Synaptotagmin-like protein 5	82.0958	-0.637006	0.182143	0.000470019	0.0154572	OK
TAGLN2	Transgelin-2 (Epididymis tissue protein Li 7e) (SM22-alpha homolog)	14636.1	0.220971	0.0738123	0.00275622	0.0569619	OK
TAP1	Antigen peptide transporter 1 (APT1) (ATP-binding cassette sub-family B member 2) (Peptide supply factor 1) (Peptide transporter PSF1) (PSF-1) (Peptide transporter TAP1) (Peptide transporter involved in antigen processing 1) (Really interesting new gene 4 protein)	649.487	0.411662	0.0879141	2.83323e-06	0.000204256	OK
TAP2	Antigen peptide transporter 2 (APT2) (ATP-binding cassette sub-family B member 3) (Peptide supply factor 2) (Peptide transporter PSF2) (PSF-2) (Peptide transporter TAP2) (Peptide transporter involved in antigen processing 2) (Really interesting new gene 11 protein)	863.122	0.278048	0.085999	0.00122432	0.0318939	OK
TBC1D5	TBC1 domain family member 5	1078.81	-0.250422	0.0824116	0.00237618	0.0521499	OK
TBC1D8	TBC1 domain family member 8 (AD 3) (Vascular Rab-GAP/TBC-containing protein)	507.077	-0.346552	0.115674	0.0027359	0.0568111	OK
TCEB3	Elongin-A (EloA) (Elongin 110 kDa subunit) (RNA polymerase II transcription factor SIII subunit A1) (SIII p110) (Transcription elongation factor B polypeptide 3)	1587.55	0.259246	0.080809	0.00133598	0.0340168	OK
TCF4	Transcription factor 4 (TCF-4) (Class B basic helix-loop-helix protein 19) (bHLHb19) (Immunoglobulin transcription factor 2) (ITF-2) (SL3-3 enhancer factor 2) (SEF-2)	375.956	-0.542038	0.11735	3.85605e-06	0.000265639	OK
TCN1	NA	203.64	-0.646911	0.144906	8.03078e-06	0.000510676	OK
TENM2	Teneurin-2 (Ten-2) (Protein Odd Oz/ten-m homolog 2) (Tenascin-M2) (Ten-m2) (Teneurin transmembrane protein 2) [Cleaved into: Ten-2, soluble form; Ten-2 intracellular domain (Ten-2 ICD)]	3171.43	0.214316	0.0697122	0.00211003	0.0480963	OK
TFCP2L1	Transcription factor CP2-like protein 1 (CP2-related transcriptional repressor 1) (CRTR-1) (Transcription factor LBP-9)	1332.61	-0.616732	0.0791694	6.69968e-15	1.62894e-12	OK
TFPI2	Tissue factor pathway inhibitor 2 (TFPI-2) (Placental protein 5) (PP5)	1304.6	0.342582	0.081229	2.47047e-05	0.0014117	OK
TGFA	Protransforming growth factor alpha [Cleaved into: Transforming growth factor alpha (TGF-alpha) (EGF-like TGF) (ETGF) (TGF type 1)]	1634.43	0.366589	0.101074	0.000286799	0.0106796	OK
TGFB3	Transforming growth factor beta-3 proprotein [Cleaved into: Latency-associated peptide (LAP); Transforming growth factor beta-3 (TGF-beta-3)]	59.2137	-0.693981	0.22869	0.00240856	0.0524888	OK
TGM1	Protein-glutamine gamma-glutamyltransferase K (EC 2.3.2.13) (Epidermal TGase) (Transglutaminase K) (TG(K)) (TGK) (TGase K) (Transglutaminase-1) (TGase-1)	824.477	0.766918	0.108277	1.41121e-12	2.96593e-10	OK
TGM2	Protein-glutamine gamma-glutamyltransferase 2 (EC 2.3.2.13) (Tissue transglutaminase) (Transglutaminase C) (TG(C)) (TGC) (TGase C) (Transglutaminase H) (TGase H) (Transglutaminase-2) (TGase-2)	3354.61	0.684959	0.124441	3.7065e-08	4.24334e-06	OK
THBD	Thrombomodulin (TM) (Fetomodulin) (CD antigen CD141)	404.687	-0.916581	0.143163	1.52972e-10	2.37106e-08	OK
THSD1	Thrombospondin type-1 domain-containing protein 1 (Transmembrane molecule with thrombospondin module)	495.697	0.385645	0.126957	0.0023847	0.0522055	OK
TICAM1	TIR domain-containing adapter molecule 1 (TICAM-1) (Proline-rich, vinculin and TIR domain-containing protein B) (Putative NF-kappa-B-activating protein 502H) (Toll-interleukin-1 receptor domain-containing adapter protein inducing interferon beta) (MyD88-3) (TIR domain-containing adapter protein inducing IFN-beta)	979.548	0.34218	0.10243	0.000835952	0.0239395	OK
TIMP3	Metalloproteinase inhibitor 3 (Protein MIG-5) (Tissue inhibitor of metalloproteinases 3) (TIMP-3)	3005.12	-0.328469	0.0848828	0.000108979	0.00491398	OK
TINF2	TERF1-interacting nuclear factor 2 (TRF1-interacting nuclear protein 2)	1339.42	0.359266	0.102389	0.000450077	0.0149623	OK
TLCD1	TLC domain-containing protein 1 (Calfacilitin)	185.189	0.585112	0.168284	0.000507208	0.0162937	OK
TMEM131	Transmembrane protein 131 (Protein RW1)	1786.73	-0.273173	0.0677166	5.48197e-05	0.00285615	OK
TMEM171	Transmembrane protein 171	84.507	0.62271	0.191544	0.00115	0.0303405	OK
TMEM189	Plasmanylethanolamine desaturase (EC 1.14.99.19) (Transmembrane protein 189)	2222.43	0.245666	0.0824557	0.00288839	0.0592001	OK
TMEM194A	Nuclear envelope integral membrane protein 1	351.655	-0.371256	0.106575	0.000494895	0.015981	OK
TMEM50B	Transmembrane protein 50B (HCV p7-trans-regulated protein 3)	356.803	-0.378887	0.11357	0.000849469	0.0241336	OK
TMEM60	Transmembrane protein 60	113.003	-0.642575	0.211294	0.00235679	0.0521396	OK
TMEM99	Transmembrane protein 99	143.18	-0.456331	0.1489	0.00217902	0.049127	OK
TNC	Tenascin (TN) (Cytotactin) (GMEM) (GP 150-225) (Glioma-associated-extracellular matrix antigen) (Hexabrachion) (JI) (Myotendinous antigen) (Neuronectin) (Tenascin-C) (TN-C)	2957.95	0.536427	0.109247	9.09651e-07	7.18451e-05	OK
TNF	Tumor necrosis factor (Cachectin) (TNF-alpha) (Tumor necrosis factor ligand superfamily member 2) (TNF-a) [Cleaved into: Tumor necrosis factor, membrane form (N-terminal fragment) (NTF); Intracellular domain 1 (ICD1); Intracellular domain 2 (ICD2); C-domain 1; C-domain 2; Tumor necrosis factor, soluble form]	35.1253	1.33353	0.250334	9.98563e-08	1.03185e-05	OK
TNFAIP1	BTB/POZ domain-containing adapter for CUL3-mediated RhoA degradation protein 2 (hBACURD2) (BTB/POZ domain-containing protein TNFAIP1) (Protein B12) (Tumor necrosis factor, alpha-induced protein 1, endothelial)	1980.18	0.280068	0.0761551	0.000235441	0.00903859	OK
TNFAIP2	Tumor necrosis factor alpha-induced protein 2 (TNF alpha-induced protein 2) (Primary response gene B94 protein)	736.292	1.44284	0.146471	6.81187e-23	2.34631e-20	OK
TNFAIP3	Tumor necrosis factor alpha-induced protein 3 (TNF alpha-induced protein 3) (EC 2.3.2.-) (EC 3.4.19.12) (OTU domain-containing protein 7C) (Putative DNA-binding protein A20) (Zinc finger protein A20) [Cleaved into: A20p50; A20p37]	2289.43	1.56123	0.1018	4.38058e-53	9.05319e-50	OK
TNFRSF10A	Tumor necrosis factor receptor superfamily member 10A (Death receptor 4) (TNF-related apoptosis-inducing ligand receptor 1) (TRAIL receptor 1) (TRAIL-R1) (CD antigen CD261)	516.327	0.478556	0.09425	3.82393e-07	3.22563e-05	OK
TNFRSF10B	Tumor necrosis factor receptor superfamily member 10B (Death receptor 5) (TNF-related apoptosis-inducing ligand receptor 2) (TRAIL receptor 2) (TRAIL-R2) (CD antigen CD262)	4315.04	0.226716	0.0679642	0.000850514	0.0241336	OK
TNFSF14	Tumor necrosis factor ligand superfamily member 14 (Herpes virus entry mediator ligand) (HVEM-L) (Herpesvirus entry mediator ligand) (CD antigen CD258) [Cleaved into: Tumor necrosis factor ligand superfamily member 14, membrane form; Tumor necrosis factor ligand superfamily member 14, soluble form]	33.0443	1.41526	0.257172	3.73003e-08	4.24334e-06	OK
TNIP1	TNFAIP3-interacting protein 1 (A20-binding inhibitor of NF-kappa-B activation 1) (ABIN-1) (HIV-1 Nef-interacting protein) (Nef-associated factor 1) (Naf1) (Nip40-1) (Virion-associated nuclear shuttling protein) (VAN) (hVAN)	4660.22	1.24247	0.0780146	4.17521e-57	1.03545e-53	OK
TNKS2	Poly [ADP-ribose] polymerase tankyrase-2 (EC 2.4.2.30) (ADP-ribosyltransferase diphtheria toxin-like 6) (ARTD6) (Poly [ADP-ribose] polymerase 5B) (Protein poly-ADP-ribosyltransferase tankyrase-2) (EC 2.4.2.-) (TNKS-2) (TRF1-interacting ankyrin-related ADP-ribose polymerase 2) (Tankyrase II) (Tankyrase-2) (TANK2) (Tankyrase-like protein) (Tankyrase-related protein)	799.462	-0.344481	0.0967876	0.00037207	0.013107	OK
TOP2A	DNA topoisomerase 2-alpha (EC 5.6.2.2) (DNA topoisomerase II, alpha isozyme)	802.975	-0.378326	0.115757	0.00108208	0.0289177	OK
TOR1B	Torsin-1B (Torsin ATPase-1B) (EC 3.6.4.-) (Torsin family 1 member B)	574.375	0.313905	0.0935969	0.000797119	0.0230941	OK
TP53INP1	Tumor protein p53-inducible nuclear protein 1 (Stress-induced protein) (p53-dependent damage-inducible nuclear protein 1) (p53DINP1)	826.749	-0.522103	0.129585	5.60045e-05	0.00289357	OK
TPCN1	Two pore calcium channel protein 1 (Voltage-dependent calcium channel protein TPC1)	688.898	0.367923	0.104018	0.000404545	0.0138573	OK
TRAF3	TNF receptor-associated factor 3 (EC 2.3.2.27) (CAP-1) (CD40 receptor-associated factor 1) (CRAF1) (CD40-binding protein) (CD40BP) (LMP1-associated protein 1) (LAP1) (RING-type E3 ubiquitin transferase TRAF3)	578.698	0.486279	0.110034	9.89899e-06	0.000613737	OK
TRIB2	Tribbles homolog 2 (TRB-2)	176.014	0.485695	0.148451	0.00106884	0.0287498	OK
TRIM14	Tripartite motif-containing protein 14	754.634	0.366038	0.0918143	6.69926e-05	0.00332283	OK
TRIM16	Tripartite motif-containing protein 16 (EC 2.3.2.27) (E3 ubiquitin-protein ligase TRIM16) (Estrogen-responsive B box protein)	1768.1	0.32966	0.087544	0.000166115	0.00679811	OK
TRIM25	E3 ubiquitin/ISG15 ligase TRIM25 (EC 6.3.2.n3) (Estrogen-responsive finger protein) (RING finger protein 147) (RING-type E3 ubiquitin transferase) (EC 2.3.2.27) (RING-type E3 ubiquitin transferase TRIM25) (Tripartite motif-containing protein 25) (Ubiquitin/ISG15-conjugating enzyme TRIM25) (Zinc finger protein 147)	1352.18	0.333129	0.0885379	0.000168184	0.00683763	OK
TRIM47	E3 ubiquitin-protein ligase TRIM47 (EC 2.3.2.27) (Gene overexpressed in astrocytoma protein) (RING finger protein 100) (Tripartite motif-containing protein 47)	125.461	0.664107	0.206248	0.00128217	0.0329171	OK
TRIML2	Probable E3 ubiquitin-protein ligase TRIML2 (EC 2.3.2.27) (RING-type E3 ubiquitin transferase TRIML2) (SPRY domain-containing protein 6) (Tripartite motif family-like protein 2)	46.9714	1.07913	0.241594	7.94319e-06	0.000507709	OK
TSC22D3	TSC22 domain family protein 3 (DSIP-immunoreactive peptide) (Protein DIP) (hDIP) (Delta sleep-inducing peptide immunoreactor) (Glucocorticoid-induced leucine zipper protein) (GILZ) (TSC-22-like protein) (TSC-22-related protein) (TSC-22R)	663.01	-0.693436	0.0970334	8.9107e-13	1.90505e-10	OK
TTC9	Tetratricopeptide repeat protein 9A (TPR repeat protein 9A)	1416.98	0.302778	0.0815667	0.000205603	0.00811936	OK
TUBA1A	Tubulin alpha-1A chain (Alpha-tubulin 3) (Tubulin B-alpha-1) (Tubulin alpha-3 chain) [Cleaved into: Detyrosinated tubulin alpha-1A chain]	6456.87	0.545505	0.0950744	9.59885e-09	1.26623e-06	OK
TUBA1B	Tubulin alpha-1B chain (Alpha-tubulin ubiquitous) (Tubulin K-alpha-1) (Tubulin alpha-ubiquitous chain) [Cleaved into: Detyrosinated tubulin alpha-1B chain]	6545.55	0.44375	0.106855	3.28371e-05	0.00184245	OK
TUBA1C	Tubulin alpha-1C chain (Alpha-tubulin 6) (Tubulin alpha-6 chain) [Cleaved into: Detyrosinated tubulin alpha-1C chain]	3536.35	0.646564	0.0978166	3.8442e-11	6.52987e-09	OK
TUBA4A	Tubulin alpha-4A chain (Alpha-tubulin 1) (Testis-specific alpha-tubulin) (Tubulin H2-alpha) (Tubulin alpha-1 chain)	7604.17	0.421682	0.0942708	7.70955e-06	0.000495328	OK
TUBB	Tubulin beta chain (Tubulin beta-5 chain)	13032.6	0.371317	0.0978426	0.000147618	0.00614251	OK
TUBB2A	Tubulin beta-2A chain (Tubulin beta class IIa)	240.539	0.393401	0.127405	0.00201649	0.0464767	OK
TUBB3	Tubulin beta-3 chain (Tubulin beta-4 chain) (Tubulin beta-III)	2956.01	0.625853	0.130482	1.6148e-06	0.000119902	OK
TUBB4B	Tubulin beta-4B chain (Tubulin beta-2 chain) (Tubulin beta-2C chain)	5677.84	0.41728	0.0907088	4.22061e-06	0.000285987	OK
TUBG1	Tubulin gamma-1 chain (Gamma-1-tubulin) (Gamma-tubulin complex component 1) (GCP-1)	1128.79	0.355026	0.108376	0.00105339	0.0284683	OK
TUFM	Elongation factor Tu, mitochondrial (EF-Tu) (P43)	2721.79	0.296033	0.0759497	9.70895e-05	0.00445893	OK
UBE2L6	Ubiquitin/ISG15-conjugating enzyme E2 L6 (EC 2.3.2.23) (E2 ubiquitin-conjugating enzyme L6) (Retinoic acid-induced gene B protein) (RIG-B) (UbcH8) (Ubiquitin carrier protein L6) (Ubiquitin-protein ligase L6)	760.387	0.398875	0.100364	7.05863e-05	0.00347329	OK
UCK2	Uridine-cytidine kinase 2 (UCK 2) (EC 2.7.1.48) (Cytidine monophosphokinase 2) (Testis-specific protein TSA903) (Uridine monophosphokinase 2)	746.308	0.321732	0.0972066	0.000933706	0.0259015	OK
UFD1L	Ubiquitin recognition factor in ER-associated degradation protein 1 (Ubiquitin fusion degradation protein 1) (UB fusion protein 1)	1456.47	0.349349	0.102644	0.000665318	0.0200728	OK
UPP1	Uridine phosphorylase 1 (UPase 1) (UrdPase 1) (EC 2.4.2.3)	1247.63	0.303125	0.0906332	0.000824248	0.0237139	OK
USB1	U6 snRNA phosphodiesterase (hUsb1) (EC 3.1.4.-)	1334.62	0.406131	0.0877531	3.6902e-06	0.000255634	OK
USP54	Inactive ubiquitin carboxyl-terminal hydrolase 54 (Inactive ubiquitin-specific peptidase 54)	492.591	0.408347	0.106777	0.000131136	0.00566579	OK
UST	Uronyl 2-sulfotransferase (EC 2.8.2.-)	224.091	-0.425695	0.132545	0.0013195	0.0337357	OK
VARS	Valine--tRNA ligase (EC 6.1.1.9) (Protein G7a) (Valyl-tRNA synthetase) (ValRS)	1118.36	0.346851	0.100537	0.000560636	0.0176444	OK
VAV3	Guanine nucleotide exchange factor VAV3 (VAV-3)	412.376	-0.608805	0.124738	1.05718e-06	8.09201e-05	OK
VEGFA	Vascular endothelial growth factor A (VEGF-A) (Vascular permeability factor) (VPF)	3239.59	0.440945	0.0664654	3.26267e-11	5.86335e-09	OK
VNN1	Pantetheinase (EC 3.5.1.92) (Pantetheine hydrolase) (Tiff66) (Vascular non-inflammatory molecule 1) (Vanin-1)	49.192	1.4697	0.235646	4.46326e-10	6.51111e-08	OK
VNN3	Vascular non-inflammatory molecule 3 (Vanin-3) (EC 3.5.1.92)	14.9177	1.39983	0.285568	9.49055e-07	7.39932e-05	OK
VSNL1	Visinin-like protein 1 (VILIP) (VLP-1) (Hippocalcin-like protein 3) (HLP3)	278.762	-0.439553	0.132108	0.000877109	0.0248314	OK
VTCN1	V-set domain-containing T-cell activation inhibitor 1 (B7 homolog 4) (B7-H4) (B7h.5) (Immune costimulatory protein B7-H4) (Protein B7S1) (T-cell costimulatory molecule B7x)	182.199	-0.960343	0.17528	4.27985e-08	4.7384e-06	OK
VWA8	von Willebrand factor A domain-containing protein 8 (PEX7-binding protein 2) (P7BP2)	1021.14	-0.270314	0.0828033	0.00109645	0.029176	OK
WDHD1	WD repeat and HMG-box DNA-binding protein 1 (Acidic nucleoplasmic DNA-binding protein 1) (And-1)	195.058	-0.41381	0.137728	0.00265978	0.0558058	OK
WLS	Protein wntless homolog (Integral membrane protein GPR177) (Protein evenness interrupted homolog) (EVI) (Putative NF-kappa-B-activating protein 373)	967.837	-0.308844	0.086862	0.000377155	0.0132111	OK
WNT7A	Protein Wnt-7a	520.573	0.51138	0.128193	6.63114e-05	0.00330225	OK
WWC1	Protein KIBRA (HBeAg-binding protein 3) (Kidney and brain protein) (KIBRA) (WW domain-containing protein 1)	973.307	0.489115	0.0870466	1.92065e-08	2.38161e-06	OK
XDH	Xanthine dehydrogenase/oxidase [Includes: Xanthine dehydrogenase (XD) (EC 1.17.1.4); Xanthine oxidase (XO) (EC 1.17.3.2) (Xanthine oxidoreductase) (XOR)]	692.475	0.707719	0.104299	1.15674e-11	2.24118e-09	OK
ZBED2	Zinc finger BED domain-containing protein 2	1000.58	0.591122	0.111727	1.21794e-07	1.22784e-05	OK
ZC3H12A	Endoribonuclease ZC3H12A (EC 3.1.-.-) (Monocyte chemotactic protein-induced protein 1) (MCP-induced protein 1) (MCPIP-1) (Regnase-1) (Reg1) (Zinc finger CCCH domain-containing protein 12A)	870.927	1.5753	0.136267	6.54011e-31	3.52597e-28	OK
ZC3H12C	Probable ribonuclease ZC3H12C (EC 3.1.-.-) (MCP-induced protein 3) (Zinc finger CCCH domain-containing protein 12C)	255.947	0.511023	0.146687	0.000494395	0.015981	OK
ZCCHC10	Zinc finger CCHC domain-containing protein 10	226.603	-0.479521	0.13404	0.000346986	0.0123995	OK
ZNF319	Zinc finger protein 319	328.377	0.420241	0.137637	0.00226379	0.0505785	OK
ZNF395	Zinc finger protein 395 (HD-regulating factor 2) (HDRF-2) (Huntington disease gene regulatory region-binding protein 2) (HD gene regulatory region-binding protein 2) (HDBP-2) (Papillomavirus regulatory factor 1) (PRF-1) (Papillomavirus-binding factor)	1048.72	-0.325641	0.0965893	0.000747864	0.0222387	OK
ZNF488	Zinc finger protein 488	47.3414	-0.925233	0.223797	3.56121e-05	0.00198022	OK
ZNF507	Zinc finger protein 507	340.884	-0.335304	0.107094	0.00174244	0.0414708	OK
ZNF704	Zinc finger protein 704	277.643	-0.407293	0.117114	0.000505628	0.0162852	OK
ZNFX1	NFX1-type zinc finger-containing protein 1	2271.75	0.229372	0.0767559	0.00280501	0.0578737	OK
ZP3	Zona pellucida sperm-binding protein 3 (Sperm receptor) (ZP3A/ZP3B) (Zona pellucida glycoprotein 3) (Zp-3) (Zona pellucida protein C) [Cleaved into: Processed zona pellucida sperm-binding protein 3]	71.7051	0.696592	0.212642	0.00105328	0.0284683	OK
ZSWIM4	Zinc finger SWIM domain-containing protein 4	449.972	0.518343	0.128071	5.18056e-05	0.00274525	OK
